# Supplementary material for: Comparative Transcriptome Analysis of Primary Roots of Brassica napus Seedlings with Extremely Different Primary Root Lengths Using RNA Sequencing
Source: PubMed Central journal article supplement (PMC4990598; doi:10.3389/fpls.2016.01238), 2016-08-19
Supplement: Presentation1.pdf [file Presentation1.pdf]

### **The self-written Perl script in NGS QC Toolkit v2.3.3 software used to clean the raw data**

First, low-quality sequences (reads has more than 70% of low-quality bases with a quality value  $\leq 20$ ) were removing from the raw data:

```
perl $NGSQCToolkit/QC/IlluQC_PRL.pl -pe R1.fastq R2.fastq N 5 -l 70 -s 20 -c 15  
-o, rawdata_stat  
-pe, Paired-end read files  
N, Do not filter for Primer/Adaptor  
5, Illumina (1.8+) (Phred+33, 33 to 74)  
-c, Number of CPUs to be used  
R1.fastq R2.fastq, input data
```

Second, the low-quality bases from the 3' terminus with a quality value  $\leq 20$  were removing:

```
perl $NGSQCToolkit/QC/IlluQC_PRL.pl -pe R1.fastq R2.fastq N 5 -l 70 -s 20 -c 15  
-o rawdata_stat  
-i, Forward read/sequence file  
-irev, Reverse read/sequence file of paired-end data  
-q, qual CutOff  
R1.fastq_filtered -irev R2.fq_filtered, input fastq data obtaining from the first step
```

Third, the uncertain bases (N) in all of the read with a length threshold  $\leq 35$ bp were removing:

```
perl $NGSQCToolkit/Trimming/AmbiguityFiltering.pl -i R1.fastq_filtered_trimmed  
-irev R2.fastq_filtered_trimmed -t5 -n 35  
-i, Forward read/sequence file  
-irev, Reverse read/sequence file of paired-end data  
-t5, Trim ambiguous bases from 5' end of the sequence  
-n, Sequence length cut-off  
R1.fastq_filtered_trimmed、 R2.fastq_filtered_trimmed, input fastq data obtaining  
from the second step
```

Then, the clean data was obtained as the final output data from the third step.

### **The self-written Perl script used for the mapping of the clean reads to the *B. napus* reference genome**

```
tophat -r 50 -o tophat --library-type fr-firststrand -p 15 genome R1.fq R2.fq  
-r, --mate-inner-dist  
--library-type, the type for the sequencing of the library  
-p, Number of CPUs to be used  
genome, name of the reference genome (The reference genome has been indexed first  
used the bowtie2-build)  
R1.fq、 R2.fq, input clean data
```
