# Supplementary material for: Comparative Transcriptome Analysis of Primary Roots of Brassica napus Seedlings with Extremely Different Primary Root Lengths Using RNA Sequencing
Source: Front Plant Sci. 2016 Aug 19;7:1238. doi: 10.3389/fpls.2016.01238 (PMC4990598; doi:10.3389/fpls.2016.01238)
Supplement: Table S1 — Detailed information on 40 natural B. napus accessions, including their accession number, and genetic distances. [file Table1.XLS]

## Sheet: Sheet1
Supplementary Table S1: Detailed information on forty natural B. napus accessions, including their accession number and genetic distances in the association population (Li et al., 2014).
Line	Accession number	3S1101	3S1103	3S1110	3S1119	3S1125	3S1129	3S1134	3S1137	3S1147	3S1157	3S1158	3S1165	3S1188	3S1189	3S1193	3S1201	3S1219	3S1228	3S1234	3S1265	3S1268	3S1285	3S1289	3S1291	3S1292	3S1295	3S1315	3S1325	3S1334	3S1337	3S1339	3S1341	3S1350	3S1355	3S1357	3S1363	3S1365	3S1370	3S1371	3S1374
D9	3S1101		0.404977	0.457599	0.378829	0.43024	0.454535	0.478836	0.410155	0.395645	0.416796	0.380267	0.492726	0.40359	0.392385	0.395864	0.473658	0.457484	0.511734	0.437556	0.499418	0.365038	0.414289	0.438469	0.464489	0.384806	0.46934	0.514771	0.410455	0.481935	0.429464	0.422577	0.372342	0.444259	0.406938	0.397761	0.456223	0.488681	0.465781	0.462946	0.524706
D59	3S1103	0.404977		0.361689	0.374912	0.365403	0.339174	0.361578	0.399584	0.44352	0.326711	0.376119	0.388796	0.399956	0.388901	0.324776	0.320357	0.417843	0.323219	0.372149	0.299973	0.376669	0.374994	0.266108	0.356028	0.344741	0.333111	0.327772	0.376884	0.352451	0.414881	0.368397	0.354411	0.351627	0.424777	0.343747	0.334988	0.338851	0.335727	0.297684	0.437349
D40	3S1110	0.457599	0.361689		0.402081	0.422187	0.422747	0.45245	0.355539	0.449745	0.386823	0.409071	0.36454	0.428949	0.438063	0.386922	0.422707	0.438792	0.34986	0.338059	0.354871	0.435828	0.383424	0.368026	0.421259	0.408089	0.386266	0.313707	0.466108	0.393363	0.390776	0.422089	0.422141	0.371227	0.393535	0.390152	0.415331	0.461588	0.347883	0.38075	0.382176
D36	3S1119	0.378829	0.374912	0.402081		0.414569	0.428701	0.417943	0.369837	0.435391	0.357231	0.361644	0.445731	0.407132	0.284438	0.320209	0.414448	0.412472	0.405051	0.394383	0.418448	0.292642	0.359346	0.378821	0.368713	0.343357	0.443048	0.408674	0.344525	0.471815	0.389242	0.43703	0.372803	0.416034	0.430665	0.381948	0.41416	0.426444	0.33373	0.411271	0.466721
D75	3S1125	0.43024	0.365403	0.422187	0.414569		0.369931	0.379762	0.410761	0.351598	0.404406	0.432422	0.419089	0.434336	0.432472	0.407072	0.381234	0.471467	0.42688	0.443807	0.416265	0.42082	0.456447	0.407245	0.415247	0.383513	0.425027	0.42951	0.387475	0.439752	0.450292	0.441509	0.37962	0.405558	0.453684	0.431937	0.418075	0.408703	0.448627	0.390284	0.432296
D63	3S1129	0.454535	0.339174	0.422747	0.428701	0.369931		0.367173	0.458509	0.427862	0.382997	0.417475	0.350199	0.427157	0.392138	0.398616	0.406132	0.391014	0.41315	0.440395	0.362979	0.404672	0.430523	0.339885	0.365013	0.379518	0.394057	0.405212	0.390867	0.379394	0.439303	0.405597	0.371346	0.361697	0.501484	0.425064	0.378992	0.343086	0.378407	0.363145	0.415835
D77	3S1134	0.478836	0.361578	0.45245	0.417943	0.379762	0.367173		0.458958	0.450201	0.409529	0.412673	0.386401	0.457025	0.396574	0.393277	0.387702	0.425602	0.430143	0.421368	0.397227	0.393423	0.42082	0.371854	0.386557	0.382852	0.396134	0.418098	0.370822	0.41734	0.429979	0.430173	0.412182	0.439389	0.515075	0.445314	0.393693	0.388697	0.402904	0.354925	0.434952
D26	3S1137	0.410155	0.399584	0.355539	0.369837	0.410761	0.458509	0.458958		0.502657	0.403369	0.410615	0.338599	0.387916	0.41334	0.376957	0.414474	0.396023	0.395988	0.346104	0.412898	0.41471	0.371662	0.414836	0.461745	0.371011	0.370327	0.366646	0.399951	0.40976	0.373718	0.491984	0.408073	0.420681	0.390495	0.334839	0.4755	0.462155	0.377234	0.439568	0.442333
D38	3S1147	0.395645	0.44352	0.449745	0.435391	0.351598	0.427862	0.450201	0.502657		0.455806	0.46061	0.523918	0.453193	0.492518	0.478313	0.413452	0.533804	0.471895	0.513958	0.462516	0.45795	0.501988	0.44105	0.423877	0.474787	0.477959	0.434652	0.461782	0.453507	0.506417	0.387255	0.474501	0.425714	0.443252	0.525727	0.411939	0.498078	0.484558	0.446516	0.395331
D37	3S1157	0.416796	0.326711	0.386823	0.357231	0.404406	0.382997	0.409529	0.403369	0.455806		0.291788	0.397147	0.394474	0.348629	0.323028	0.37438	0.379451	0.357781	0.326994	0.350291	0.340751	0.334382	0.341908	0.384684	0.345226	0.397419	0.407929	0.338946	0.389629	0.374357	0.392467	0.324523	0.393854	0.360302	0.377245	0.362988	0.385815	0.346927	0.288338	0.451141
D35	3S1158	0.380267	0.376119	0.409071	0.361644	0.432422	0.417475	0.412673	0.410615	0.46061	0.291788		0.42864	0.411806	0.329115	0.310914	0.443782	0.396491	0.422983	0.321796	0.376479	0.331642	0.287625	0.386149	0.409494	0.327377	0.419613	0.428333	0.336807	0.403617	0.353059	0.38717	0.337161	0.415706	0.378346	0.359824	0.382401	0.411325	0.406924	0.322644	0.492681
D13	3S1165	0.492726	0.388796	0.36454	0.445731	0.419089	0.350199	0.386401	0.338599	0.523918	0.397147	0.42864		0.446713	0.375702	0.419403	0.465172	0.352154	0.357374	0.359248	0.359706	0.422507	0.374666	0.383336	0.392719	0.413761	0.354776	0.359826	0.376925	0.3467	0.365143	0.454261	0.380718	0.407875	0.434116	0.412191	0.421454	0.375979	0.327983	0.38442	0.418499
D49	3S1188	0.40359	0.399956	0.428949	0.407132	0.434336	0.427157	0.457025	0.387916	0.453193	0.394474	0.411806	0.446713		0.403621	0.382828	0.43188	0.415794	0.443761	0.396077	0.420338	0.396709	0.348381	0.416186	0.417965	0.375648	0.432215	0.456581	0.413638	0.42523	0.417222	0.482496	0.404909	0.450528	0.454791	0.201081	0.461152	0.482306	0.446331	0.468032	0.451213
D55	3S1189	0.392385	0.388901	0.438063	0.284438	0.432472	0.392138	0.396574	0.41334	0.492518	0.348629	0.329115	0.375702	0.403621		0.328963	0.438643	0.340539	0.407004	0.364245	0.441773	0.331516	0.31024	0.372619	0.377079	0.350389	0.399596	0.420024	0.325916	0.441205	0.370377	0.429361	0.313127	0.413384	0.438488	0.371405	0.380986	0.358714	0.416549	0.36864	0.481774
D27	3S1193	0.395864	0.324776	0.386922	0.320209	0.407072	0.398616	0.393277	0.376957	0.478313	0.323028	0.310914	0.419403	0.382828	0.328963		0.380198	0.384467	0.387107	0.338183	0.367193	0.349322	0.335263	0.313386	0.392963	0.313597	0.43647	0.35477	0.352905	0.402704	0.377103	0.413785	0.353124	0.369568	0.431234	0.338641	0.364346	0.412572	0.385229	0.35457	0.47394
D3	3S1201	0.473658	0.320357	0.422707	0.414448	0.381234	0.406132	0.387702	0.414474	0.413452	0.37438	0.443782	0.465172	0.43188	0.438643	0.380198		0.46277	0.385319	0.440215	0.384208	0.438898	0.444799	0.35391	0.398263	0.423859	0.402272	0.384143	0.412745	0.41656	0.471508	0.385068	0.423704	0.408121	0.471333	0.418707	0.349146	0.41482	0.404856	0.345873	0.366902
D32	3S1219	0.457484	0.417843	0.438792	0.412472	0.471467	0.391014	0.425602	0.396023	0.533804	0.379451	0.396491	0.352154	0.415794	0.340539	0.384467	0.46277		0.402866	0.376016	0.415924	0.378281	0.373628	0.3987	0.414139	0.377891	0.385924	0.443128	0.367	0.405469	0.376605	0.431799	0.351049	0.437956	0.463818	0.387672	0.402403	0.386732	0.402482	0.380293	0.445147
D43	3S1228	0.511734	0.323219	0.34986	0.405051	0.42688	0.41315	0.430143	0.395988	0.471895	0.357781	0.422983	0.357374	0.443761	0.407004	0.387107	0.385319	0.402866		0.333629	0.281679	0.427315	0.358266	0.338549	0.370456	0.439027	0.315974	0.278533	0.401851	0.334441	0.411582	0.405658	0.397409	0.36342	0.405362	0.400403	0.384337	0.386974	0.312638	0.33062	0.386219
D32	3S1234	0.437556	0.372149	0.338059	0.394383	0.443807	0.440395	0.421368	0.346104	0.513958	0.326994	0.321796	0.359248	0.396077	0.364245	0.338183	0.440215	0.376016	0.333629		0.327389	0.354814	0.302203	0.378641	0.434053	0.361539	0.338412	0.357958	0.361524	0.344735	0.319881	0.454723	0.361978	0.401271	0.373542	0.348215	0.404068	0.449799	0.347416	0.362052	0.43409
D39	3S1265	0.499418	0.299973	0.354871	0.418448	0.416265	0.362979	0.397227	0.412898	0.462516	0.350291	0.376479	0.359706	0.420338	0.441773	0.367193	0.384208	0.415924	0.281679	0.327389		0.414837	0.368849	0.309217	0.388722	0.397159	0.340437	0.273956	0.40804	0.300228	0.380115	0.397563	0.406136	0.341602	0.382661	0.396843	0.369633	0.393456	0.285122	0.313174	0.399341
D67	3S1268	0.365038	0.376669	0.435828	0.292642	0.42082	0.404672	0.393423	0.41471	0.45795	0.340751	0.331642	0.422507	0.396709	0.331516	0.349322	0.438898	0.378281	0.427315	0.354814	0.414837		0.354571	0.375777	0.282343	0.336457	0.424238	0.455839	0.316063	0.420961	0.361045	0.429572	0.335896	0.448677	0.414274	0.400168	0.388487	0.425928	0.340732	0.366329	0.496353
D78	3S1285	0.414289	0.374994	0.383424	0.359346	0.456447	0.430523	0.42082	0.371662	0.501988	0.334382	0.287625	0.374666	0.348381	0.31024	0.335263	0.444799	0.373628	0.358266	0.302203	0.368849	0.354571		0.385773	0.393859	0.34959	0.368133	0.384455	0.358414	0.39512	0.33752	0.427571	0.344519	0.424555	0.398443	0.231206	0.390156	0.423643	0.359647	0.339322	0.452681
D5	3S1289	0.438469	0.266108	0.368026	0.378821	0.407245	0.339885	0.371854	0.414836	0.44105	0.341908	0.386149	0.383336	0.416186	0.372619	0.313386	0.35391	0.3987	0.338549	0.378641	0.309217	0.375777	0.385773		0.348229	0.357038	0.400098	0.326627	0.377168	0.341441	0.38347	0.358787	0.367239	0.328801	0.442936	0.382984	0.337586	0.377904	0.340534	0.338068	0.434473
D72	3S1291	0.464489	0.356028	0.421259	0.368713	0.415247	0.365013	0.386557	0.461745	0.423877	0.384684	0.409494	0.392719	0.417965	0.377079	0.392963	0.398263	0.414139	0.370456	0.434053	0.388722	0.282343	0.393859	0.348229		0.402018	0.395099	0.401649	0.378042	0.390544	0.420169	0.397648	0.392893	0.38936	0.472299	0.418699	0.357773	0.400213	0.348543	0.33621	0.427174
D7	3S1292	0.384806	0.344741	0.408089	0.343357	0.383513	0.379518	0.382852	0.371011	0.474787	0.345226	0.327377	0.413761	0.375648	0.350389	0.313597	0.423859	0.377891	0.439027	0.361539	0.397159	0.336457	0.34959	0.357038	0.402018		0.418517	0.439272	0.337447	0.420487	0.350393	0.427269	0.370002	0.389547	0.439927	0.339671	0.406149	0.422987	0.398701	0.382831	0.471167
D53	3S1295	0.46934	0.333111	0.386266	0.443048	0.425027	0.394057	0.396134	0.370327	0.477959	0.397419	0.419613	0.354776	0.432215	0.399596	0.43647	0.402272	0.385924	0.315974	0.338412	0.340437	0.424238	0.368133	0.400098	0.395099	0.418517		0.357978	0.408011	0.33343	0.417961	0.426883	0.392722	0.409315	0.398015	0.382113	0.37957	0.371389	0.336635	0.360371	0.386721
D61	3S1315	0.514771	0.327772	0.313707	0.408674	0.42951	0.405212	0.418098	0.366646	0.434652	0.407929	0.428333	0.359826	0.456581	0.420024	0.35477	0.384143	0.443128	0.278533	0.357958	0.273956	0.455839	0.384455	0.326627	0.401649	0.439272	0.357978		0.435975	0.345087	0.413326	0.420153	0.438673	0.354807	0.407133	0.423223	0.389469	0.415179	0.31673	0.350018	0.385784
D1	3S1325	0.410455	0.376884	0.466108	0.344525	0.387475	0.390867	0.370822	0.399951	0.461782	0.338946	0.336807	0.376925	0.413638	0.325916	0.352905	0.412745	0.367	0.401851	0.361524	0.40804	0.316063	0.358414	0.377168	0.378042	0.337447	0.408011	0.435975		0.414933	0.334957	0.439041	0.319878	0.425699	0.452724	0.395259	0.411675	0.392199	0.40868	0.377084	0.482452
D29	3S1334	0.481935	0.352451	0.393363	0.471815	0.439752	0.379394	0.41734	0.40976	0.453507	0.389629	0.403617	0.3467	0.42523	0.441205	0.402704	0.41656	0.405469	0.334441	0.344735	0.300228	0.420961	0.39512	0.341441	0.390544	0.420487	0.33343	0.345087	0.414933		0.375986	0.422456	0.409183	0.382221	0.382601	0.412038	0.371653	0.401504	0.333348	0.345512	0.392537
D15	3S1337	0.429464	0.414881	0.390776	0.389242	0.450292	0.439303	0.429979	0.373718	0.506417	0.374357	0.353059	0.365143	0.417222	0.370377	0.377103	0.471508	0.376605	0.411582	0.319881	0.380115	0.361045	0.33752	0.38347	0.420169	0.350393	0.417961	0.413326	0.334957	0.375986		0.434459	0.385551	0.405147	0.409426	0.381758	0.432546	0.466165	0.374465	0.411725	0.437631
D18	3S1339	0.422577	0.368397	0.422089	0.43703	0.441509	0.405597	0.430173	0.491984	0.387255	0.392467	0.38717	0.454261	0.482496	0.429361	0.413785	0.385068	0.431799	0.405658	0.454723	0.397563	0.429572	0.427571	0.358787	0.397648	0.427269	0.426883	0.420153	0.439041	0.422456	0.434459		0.416287	0.421336	0.418702	0.468203	0.27682	0.418343	0.39264	0.350529	0.426482
D30	3S1341	0.372342	0.354411	0.422141	0.372803	0.37962	0.371346	0.412182	0.408073	0.474501	0.324523	0.337161	0.380718	0.404909	0.313127	0.353124	0.423704	0.351049	0.397409	0.361978	0.406136	0.335896	0.344519	0.367239	0.392893	0.370002	0.392722	0.438673	0.319878	0.409183	0.385551	0.416287		0.414933	0.410915	0.365408	0.387256	0.371202	0.412975	0.345435	0.492618
D31	3S1350	0.444259	0.351627	0.371227	0.416034	0.405558	0.361697	0.439389	0.420681	0.425714	0.393854	0.415706	0.407875	0.450528	0.413384	0.369568	0.408121	0.437956	0.36342	0.401271	0.341602	0.448677	0.424555	0.328801	0.38936	0.389547	0.409315	0.354807	0.425699	0.382221	0.405147	0.421336	0.414933		0.443254	0.412508	0.391909	0.398423	0.363261	0.365731	0.414246
D42	3S1355	0.406938	0.424777	0.393535	0.430665	0.453684	0.501484	0.515075	0.390495	0.443252	0.360302	0.378346	0.434116	0.454791	0.438488	0.431234	0.471333	0.463818	0.405362	0.373542	0.382661	0.414274	0.398443	0.442936	0.472299	0.439927	0.398015	0.407133	0.452724	0.382601	0.409426	0.418702	0.410915	0.443254		0.442075	0.438551	0.490429	0.407275	0.405212	0.45467
D33	3S1357	0.397761	0.343747	0.390152	0.381948	0.431937	0.425064	0.445314	0.334839	0.525727	0.377245	0.359824	0.412191	0.201081	0.371405	0.338641	0.418707	0.387672	0.400403	0.348215	0.396843	0.400168	0.231206	0.382984	0.418699	0.339671	0.382113	0.423223	0.395259	0.412038	0.381758	0.468203	0.365408	0.412508	0.442075		0.442812	0.42759	0.410973	0.414514	0.479892
D28	3S1363	0.456223	0.334988	0.415331	0.41416	0.418075	0.378992	0.393693	0.4755	0.411939	0.362988	0.382401	0.421454	0.461152	0.380986	0.364346	0.349146	0.402403	0.384337	0.404068	0.369633	0.388487	0.390156	0.337586	0.357773	0.406149	0.37957	0.389469	0.411675	0.371653	0.432546	0.27682	0.387256	0.391909	0.438551	0.442812		0.39796	0.370653	0.324298	0.387039
D41	3S1365	0.488681	0.338851	0.461588	0.426444	0.408703	0.343086	0.388697	0.462155	0.498078	0.385815	0.411325	0.375979	0.482306	0.358714	0.412572	0.41482	0.386732	0.386974	0.449799	0.393456	0.425928	0.423643	0.377904	0.400213	0.422987	0.371389	0.415179	0.392199	0.401504	0.466165	0.418343	0.371202	0.398423	0.490429	0.42759	0.39796		0.401853	0.345232	0.473213
D21	3S1370	0.465781	0.335727	0.347883	0.33373	0.448627	0.378407	0.402904	0.377234	0.484558	0.346927	0.406924	0.327983	0.446331	0.416549	0.385229	0.404856	0.402482	0.312638	0.347416	0.285122	0.340732	0.359647	0.340534	0.348543	0.398701	0.336635	0.31673	0.40868	0.333348	0.374465	0.39264	0.412975	0.363261	0.407275	0.410973	0.370653	0.401853		0.316365	0.373693
D14	3S1371	0.462946	0.297684	0.38075	0.411271	0.390284	0.363145	0.354925	0.439568	0.446516	0.288338	0.322644	0.38442	0.468032	0.36864	0.35457	0.345873	0.380293	0.33062	0.362052	0.313174	0.366329	0.339322	0.338068	0.33621	0.382831	0.360371	0.350018	0.377084	0.345512	0.411725	0.350529	0.345435	0.365731	0.405212	0.414514	0.324298	0.345232	0.316365		0.415073
D69	3S1374	0.524706	0.437349	0.382176	0.466721	0.432296	0.415835	0.434952	0.442333	0.395331	0.451141	0.492681	0.418499	0.451213	0.481774	0.47394	0.366902	0.445147	0.386219	0.43409	0.399341	0.496353	0.452681	0.434473	0.427174	0.471167	0.386721	0.385784	0.482452	0.392537	0.437631	0.426482	0.492618	0.414246	0.45467	0.479892	0.387039	0.473213	0.373693	0.415073
