# Supplementary material for: Comparative Transcriptome Analysis of Primary Roots of Brassica napus Seedlings with Extremely Different Primary Root Lengths Using RNA Sequencing
Source: Front Plant Sci. 2016 Aug 19;7:1238. doi: 10.3389/fpls.2016.01238 (PMC4990598; doi:10.3389/fpls.2016.01238)
Supplement: Table S5 — Detailed subcategory GO enrichment analysis of all of the detected genes under three main GO classification categories. [file Table5.XLS]

## Sheet: enrichment-go-DESeq-expressed_f
Supplementary Table S5: Detailed subcategory GO enrichment analysis of all of the detected genes under three main GO classification categories.
GO ID	Term	category	ListHits	ListTotal	p	FDR	Enrichment_score	GeneID
GO:0055114	oxidation-reduction process	biological_process	2738	39262	0.988926	1	0.977827	BnaA10g15310D,BnaCnng38640D,BnaC03g49190D,BnaA08g20300D,BnaA01g07200D,BnaC01g22840D,BnaA05g19010D,BnaC06g11450D,BnaC01g28060D,BnaC07g46390D,BnaC02g03980D,BnaA09g08390D,BnaA02g36110D,BnaC08g43490D,BnaC04g45850D,BnaA05g09340D,BnaC03g65310D,BnaA06g20870D,BnaC08g44090D,BnaC05g39590D,BnaA01g32860D,BnaC01g13770D,BnaA06g31460D,BnaC03g33490D,BnaA10g10200D,BnaC03g05860D,BnaA03g53180D,BnaAnng01430D,BnaC09g…
GO:0006468	protein phosphorylation	biological_process	2575	39262	0.0254377	0.0443473	1.01948	BnaCnng48630D,BnaA10g08090D,BnaC01g39300D,BnaC03g31970D,BnaA09g29620D,BnaA07g26130D,BnaC01g15460D,BnaC01g18070D,BnaAnng31880D,BnaA07g14290D,BnaC03g14930D,BnaC09g19110D,BnaC09g09120D,BnaA01g09530D,BnaC08g03540D,BnaA03g19260D,BnaCnng23380D,BnaA06g37490D,BnaA01g33140D,BnaC09g33860D,BnaC03g18140D,BnaC03g54720D,BnaA06g25490D,BnaC04g19100D,BnaA10g11610D,BnaA05g16720D,BnaA03g23220D,BnaC03g50700D,BnaC09g…
GO:0008152	metabolic process	biological_process	1734	39262	1.88e-13	4.87e-13	1.09105	BnaC08g03220D,BnaA09g57250D,BnaC03g49190D,BnaC08g09570D,BnaA08g20300D,BnaC07g45790D,BnaC04g33690D,BnaAnng34490D,BnaCnng20770D,BnaCnng23380D,BnaC07g23000D,BnaA02g36110D,BnaCnng13390D,BnaC08g30890D,BnaC04g46450D,BnaA05g04720D,BnaC09g09440D,BnaA10g00370D,BnaA05g15310D,BnaC05g30950D,BnaA07g26770D,BnaC04g40420D,BnaC02g03490D,BnaA04g19290D,BnaC09g42760D,BnaC06g22680D,BnaC03g13030D,BnaC06g36850D,BnaA04g…
GO:0055085	transmembrane transport	biological_process	1218	39262	0.170034	0.242023	1.01383	BnaC09g38160D,BnaC03g18950D,BnaC07g01980D,BnaA05g35770D,BnaA04g14030D,BnaC08g42890D,BnaC09g20290D,BnaC03g12920D,BnaA03g50250D,BnaC03g64710D,BnaA10g29800D,BnaC01g12040D,BnaA06g23480D,BnaC03g69650D,BnaA07g35030D,BnaA08g16170D,BnaCnng41510D,BnaA03g28160D,BnaCnng06500D,BnaA03g21530D,BnaA01g30040D,BnaA07g32740D,BnaC03g59980D,BnaA06g32380D,BnaC04g16000D,BnaC04g06010D,BnaA07g23350D,BnaCnng37060D,BnaCnng…
GO:0006412	translation	biological_process	1176	39262	2.27e-42	5.95e-42	1.20903	BnaA04g01110D,BnaC08g42570D,BnaAnng03930D,BnaC08g45180D,BnaC07g26420D,BnaA09g55240D,BnaA05g34040D,BnaC03g08960D,BnaC03g13200D,BnaA08g17260D,BnaC09g06510D,BnaAnng02840D,BnaA03g29570D,BnaC08g32090D,BnaA02g21980D,BnaC01g37930D,BnaAnng28200D,BnaA02g30400D,BnaC02g12070D,BnaC04g42750D,BnaA08g29090D,BnaA04g28840D,BnaC05g07130D,BnaA10g10840D,BnaC03g13350D,BnaC02g00390D,BnaC03g58890D,BnaC01g30810D,BnaA04g…
GO:0005975	carbohydrate metabolic process	biological_process	998	39262	1	1	0.916875	BnaA09g57250D,BnaC07g23810D,BnaA08g00480D,BnaA04g07780D,BnaC03g03530D,BnaA04g03760D,BnaA01g03500D,BnaC03g14120D,BnaC02g01160D,BnaC06g38540D,BnaA01g34060D,BnaC08g18630D,BnaC03g56240D,BnaC03g12430D,BnaC03g67960D,BnaA09g15440D,BnaA01g06750D,BnaA03g21850D,BnaA03g50080D,BnaC04g03720D,BnaAnng15110D,BnaA05g10520D,BnaA01g31280D,BnaC09g13230D,BnaC09g50410D,BnaA05g04060D,BnaC05g18520D,BnaA07g00920D,BnaCnng…
GO:0006810	transport	biological_process	919	39262	0.000429828	0.000961411	1.0573	BnaA08g18670D,BnaC02g17990D,BnaA04g02840D,BnaC07g01980D,BnaCnng63980D,BnaA07g29870D,BnaC06g25780D,BnaA07g20100D,BnaA05g06730D,BnaA03g21210D,BnaA03g14960D,BnaC03g18460D,BnaA08g16170D,BnaA08g24150D,BnaCnng06500D,BnaA01g30040D,BnaA07g32740D,BnaA06g06600D,BnaC04g06010D,BnaC07g20220D,BnaAnng06690D,BnaC01g07800D,BnaA08g30600D,BnaC03g25510D,BnaC05g43220D,BnaC04g04640D,BnaA06g18430D,BnaA02g36580D,BnaA05g…
GO:0006508	proteolysis	biological_process	891	39262	1	1	0.779692	BnaA03g14320D,BnaA06g36890D,BnaA09g47580D,BnaCnng63170D,BnaC01g15780D,BnaA09g25920D,BnaA09g15930D,BnaA10g15950D,BnaC09g14810D,BnaCnng74080D,BnaA04g15270D,BnaC09g08350D,BnaC03g19380D,BnaCnng09430D,BnaA06g18920D,BnaA10g29630D,BnaC03g55150D,BnaA09g14350D,BnaC04g40250D,BnaC07g28090D,BnaA02g07220D,BnaC01g05300D,BnaA10g23110D,BnaC02g26390D,BnaC07g32530D,BnaC05g15740D,BnaA08g06330D,BnaC04g51960D,BnaC07g…
GO:0007165	signal transduction	biological_process	758	39262	0.00159363	0.00339369	1.05581	BnaA08g16660D,BnaC09g39890D,BnaAnng31880D,BnaC09g33860D,BnaA06g35480D,BnaA05g16720D,BnaA08g11230D,BnaC03g09880D,BnaA06g34070D,BnaC05g47410D,BnaA08g15570D,BnaA10g00690D,BnaA01g33780D,BnaC09g50900D,BnaCnng49380D,BnaC07g37000D,BnaC05g06040D,BnaC01g31410D,BnaC08g11510D,BnaC09g12630D,BnaAnng17440D,BnaC09g18980D,BnaC09g09590D,BnaC04g51810D,BnaA09g16680D,BnaC01g40310D,BnaA10g20500D,BnaC07g35950D,BnaCnng…
GO:0006886	intracellular protein transport	biological_process	662	39262	5.41e-27	1.41e-26	1.21962	BnaC09g40920D,BnaA06g35480D,BnaC06g39950D,BnaC03g09880D,BnaCnng48140D,BnaA07g37040D,BnaC05g06210D,BnaA07g09410D,BnaA10g19160D,BnaC09g41030D,BnaC06g24690D,BnaA06g06600D,BnaC04g55510D,BnaC06g37770D,BnaC01g07800D,BnaA03g46120D,BnaC07g38240D,BnaA08g30110D,BnaC07g43930D,BnaA08g02800D,BnaC08g35500D,BnaC08g38110D,BnaAnng13250D,BnaC01g03930D,BnaA08g08340D,BnaC06g00520D,BnaC07g32850D,BnaA02g30380D,BnaA06g…
GO:0006629	lipid metabolic process	biological_process	469	39262	0.999654	1	0.919202	BnaA04g10820D,BnaA08g22630D,BnaC09g41840D,BnaC03g32080D,BnaA07g31010D,BnaA02g36750D,BnaA10g19480D,BnaA03g18490D,BnaC06g06720D,BnaA01g15810D,BnaA05g14050D,BnaA01g07180D,BnaC09g15880D,BnaA03g43830D,BnaA05g12360D,BnaC08g23660D,BnaAnng12970D,BnaC07g36060D,BnaAnng22470D,BnaAnng36640D,BnaCnng67650D,BnaA02g12730D,BnaC06g13430D,BnaA04g05420D,BnaA10g04040D,BnaC03g07520D,BnaA08g16950D,BnaC05g36950D,BnaAnng…
GO:0015031	protein transport	biological_process	461	39262	1.72e-09	4.37e-09	1.14565	BnaC05g22330D,BnaA06g35480D,BnaC03g09880D,BnaA10g19160D,BnaC06g24690D,BnaC09g50900D,BnaC02g23950D,BnaC09g09590D,BnaA07g30560D,BnaC07g38240D,BnaA08g30110D,BnaCnng56430D,BnaC09g10130D,BnaA10g25440D,BnaC07g39160D,BnaA08g02800D,BnaC08g35500D,BnaC08g38110D,BnaC08g22250D,BnaA08g08340D,BnaC06g00520D,BnaC07g05820D,BnaAnng10150D,BnaA08g04640D,BnaC02g46360D,BnaC02g31750D,BnaA04g08200D,BnaC04g51470D,BnaC02g…
GO:0006457	protein folding	biological_process	409	39262	5.41e-20	1.41e-19	1.23661	BnaA05g33440D,BnaC03g44570D,BnaC08g43170D,BnaC03g07550D,BnaA09g26520D,BnaA05g37290D,BnaC05g28190D,BnaAnng17610D,BnaA04g16190D,BnaA03g10770D,BnaC08g26440D,BnaAnng22000D,BnaC01g39280D,BnaC03g02590D,BnaCnng08980D,BnaA01g14720D,BnaA09g43710D,BnaA03g48280D,BnaC01g01110D,BnaC01g16200D,BnaC02g04720D,BnaC02g12700D,BnaA01g13780D,BnaA08g14300D,BnaA08g00450D,BnaA04g12800D,BnaC01g03590D,BnaAnng09440D,BnaA01g…
GO:0006952	defense response	biological_process	381	39262	0.98228	1	0.943448	BnaC08g40560D,BnaC09g39890D,BnaC08g06150D,BnaA07g12280D,BnaC04g49060D,BnaA08g15570D,BnaCnng64090D,BnaC07g18270D,BnaA01g33780D,BnaC07g37000D,BnaC08g11510D,BnaC09g12630D,BnaC09g18980D,BnaA09g16680D,BnaC01g40310D,BnaC07g35950D,BnaC05g19440D,BnaC06g40800D,BnaC03g63280D,BnaA06g08270D,BnaC09g10770D,BnaA02g17520D,BnaC08g37660D,BnaA02g23810D,BnaA01g10040D,BnaA05g24990D,BnaA03g44090D,BnaC03g18920D,BnaA01g…
GO:0009058	biosynthetic process	biological_process	378	39262	0.000114495	0.000266237	1.09958	BnaC03g30560D,BnaA01g04910D,BnaA08g11060D,BnaA04g28670D,BnaC08g15040D,BnaA07g31160D,BnaC05g41530D,BnaC07g43610D,BnaA04g21230D,BnaA07g22090D,BnaAnng37410D,BnaC04g24610D,BnaCnng03870D,BnaA08g08660D,BnaC07g38390D,BnaC06g40630D,BnaA09g31220D,BnaA10g25590D,BnaA03g19400D,BnaA03g40560D,BnaC06g22820D,BnaA10g01750D,BnaC09g37040D,BnaC01g38820D,BnaC08g06270D,BnaC04g41630D,BnaC03g02240D,BnaC03g05980D,BnaAnng…
GO:0045454	cell redox homeostasis	biological_process	333	39262	0.000320383	0.000721521	1.09814	BnaCnng23060D,BnaC05g32320D,BnaC09g05910D,BnaC03g69330D,BnaA09g02360D,BnaCnng05900D,BnaA08g14160D,BnaC05g47730D,BnaA03g36300D,BnaA10g27940D,BnaA06g04420D,BnaC05g43860D,BnaC05g05590D,BnaC07g07510D,BnaC01g07140D,BnaA08g04320D,BnaC04g26940D,BnaA04g20460D,BnaAnng12480D,BnaA06g02880D,BnaA09g49730D,BnaC06g15930D,BnaC04g32420D,BnaC01g25910D,BnaC06g17130D,BnaC09g22760D,BnaC01g13420D,BnaC08g42050D,BnaA03g…
GO:0007264	small GTPase mediated signal transduction	biological_process	328	39262	1.43e-08	3.58e-08	1.16208	BnaA06g35480D,BnaC03g09880D,BnaA10g19160D,BnaC06g24690D,BnaC09g50900D,BnaC09g09590D,BnaA08g30110D,BnaA08g02800D,BnaC08g35500D,BnaC08g38110D,BnaA08g08340D,BnaC06g00520D,BnaC07g05820D,BnaA08g04640D,BnaC02g46360D,BnaC02g31750D,BnaA04g08200D,BnaC04g51470D,BnaC02g42340D,BnaA05g34500D,BnaCnng13850D,BnaC09g34430D,BnaC07g02870D,BnaC08g33790D,BnaC08g03020D,BnaC09g31330D,BnaAnng31680D,BnaA09g15410D,BnaCnng…
GO:0016192	vesicle-mediated transport	biological_process	315	39262	1.82e-07	4.5e-07	1.15145	BnaC02g02250D,BnaC05g06210D,BnaA07g09410D,BnaC03g18460D,BnaC09g41030D,BnaA06g06600D,BnaA07g08320D,BnaC05g09460D,BnaA08g30600D,BnaC04g43180D,BnaA03g46120D,BnaC07g38240D,BnaA03g08500D,BnaC01g35580D,BnaA10g09000D,BnaC01g03930D,BnaC07g32850D,BnaA10g29290D,BnaCnng54570D,BnaA03g33990D,BnaC08g41300D,BnaC09g46600D,BnaA05g27280D,BnaC06g20810D,BnaC09g49850D,BnaCnng36920D,BnaA03g03370D,BnaAnng03410D,BnaC01g…
GO:0006184	obsolete GTP catabolic process	biological_process	306	39262	2.8e-12	7.2e-12	1.20804	BnaC09g37880D,BnaAnng41710D,BnaA06g35480D,BnaC09g44450D,BnaC03g09880D,BnaC09g50900D,BnaA02g31320D,BnaC01g07800D,BnaC09g09590D,BnaA08g02800D,BnaC03g75120D,BnaC08g35500D,BnaC08g38110D,BnaA08g08340D,BnaC06g00520D,BnaC07g05820D,BnaA08g04640D,BnaC02g31750D,BnaC02g42340D,BnaA05g34500D,BnaCnng13850D,BnaC09g34430D,BnaC07g02870D,BnaC08g03020D,BnaAnng31680D,BnaCnng35340D,BnaC03g17660D,BnaC09g35180D,BnaA10g…
GO:0006979	response to oxidative stress	biological_process	258	39262	0.063573	0.101371	1.0485	BnaA10g15310D,BnaA09g08390D,BnaC08g43490D,BnaC08g44090D,BnaC03g33490D,BnaA03g53180D,BnaC04g56600D,BnaAnng29930D,BnaA04g22000D,BnaAnng19770D,BnaC06g32660D,BnaC02g07500D,BnaCnng27540D,BnaC02g37290D,BnaA04g06510D,BnaA07g12740D,BnaC03g08610D,BnaC02g09490D,BnaA10g03270D,BnaA01g37280D,BnaA05g33880D,BnaA01g20660D,BnaAnng16320D,BnaA09g21850D,BnaC09g54550D,BnaA05g11240D,BnaC01g39080D,BnaC05g46590D,BnaC01g…
GO:0030001	metal ion transport	biological_process	255	39262	0.00270852	0.00559398	1.09085	BnaC03g01200D,BnaC01g12040D,BnaC04g20280D,BnaC03g16450D,BnaA03g13550D,BnaA09g47090D,BnaC02g39810D,BnaA09g55390D,BnaC02g25960D,BnaC01g39770D,BnaA07g04620D,BnaC01g20170D,BnaA05g07480D,BnaC04g51000D,BnaC07g33620D,BnaA03g30100D,BnaA06g10710D,BnaC05g40440D,BnaC02g05810D,BnaCnng03380D,BnaA04g21380D,BnaC04g48600D,BnaA02g10720D,BnaA05g31400D,BnaA04g02810D,BnaCnng27370D,BnaC06g14030D,BnaA04g18660D,BnaC04g…
GO:0006812	cation transport	biological_process	251	39262	0.999942	1	0.875802	BnaC03g41960D,BnaC07g02580D,BnaC01g28380D,BnaA07g35030D,BnaA01g06430D,BnaA03g21530D,BnaA10g11120D,BnaA08g15080D,BnaC05g49250D,BnaA06g07520D,BnaA07g20250D,BnaC04g00620D,BnaA03g49860D,BnaC05g46790D,BnaA09g37250D,BnaC03g48240D,BnaC08g33960D,BnaA09g49240D,BnaC08g30540D,BnaA01g24360D,BnaC03g68040D,BnaA04g28640D,BnaC05g00300D,BnaCnng57000D,BnaC08g28250D,BnaA06g09480D,BnaA05g01080D,BnaC04g27020D,BnaA09g…
GO:0006511	ubiquitin-dependent protein catabolic process	biological_process	226	39262	0.953576	1	0.940584	BnaA02g35510D,BnaA08g16980D,BnaA10g12210D,BnaC07g39010D,BnaA04g28030D,BnaA04g02180D,BnaA06g17020D,BnaAnng00170D,BnaC07g43120D,BnaC03g38100D,BnaA03g58110D,BnaA07g19050D,BnaC04g47510D,BnaC09g33510D,BnaA07g38100D,BnaC02g01940D,BnaC03g30850D,BnaA02g19190D,BnaA03g26120D,BnaC08g01010D,BnaC04g17530D,BnaA01g05140D,BnaA09g17890D,BnaA09g31830D,BnaC07g41060D,BnaCnng60820D,BnaC04g30530D,BnaA02g00690D,BnaA08g…
GO:0016567	protein ubiquitination	biological_process	201	39262	0.000581991	0.00128948	1.11988	BnaCnng64260D,BnaA10g08090D,BnaA02g35510D,BnaA02g33500D,BnaA07g29060D,BnaC06g37130D,BnaCnng58610D,BnaAnng04680D,BnaA04g28030D,BnaA03g10450D,BnaC07g15170D,BnaA04g02180D,BnaA04g20950D,BnaC04g40080D,BnaC06g32170D,BnaA06g19180D,BnaC04g50550D,BnaA07g19050D,BnaC02g43580D,BnaAnng35870D,BnaA10g16520D,BnaC05g44600D,BnaC04g04610D,BnaA01g20980D,BnaA08g21660D,BnaC02g45900D,BnaC03g52660D,BnaC08g25640D,BnaC03g…
GO:0006633	fatty acid biosynthetic process	biological_process	197	39262	0.00422303	0.00844607	1.09759	BnaA03g17570D,BnaC01g12360D,BnaC06g22680D,BnaAnng26510D,BnaC06g35760D,BnaCnng52900D,BnaC03g24420D,BnaA01g14400D,BnaC06g34180D,BnaC04g10440D,BnaCnng41490D,BnaA03g06000D,BnaC01g17610D,BnaA09g42770D,BnaCnng70200D,BnaC02g06560D,BnaC06g26990D,BnaA04g00630D,BnaA03g10100D,BnaCnng58900D,BnaC01g14170D,BnaA03g17370D,BnaA03g25350D,BnaA10g18680D,BnaA04g12460D,BnaC05g06160D,BnaC04g03030D,BnaC04g07690D,BnaC08g…
GO:0006334	nucleosome assembly	biological_process	193	39262	4.37e-09	1.1e-08	1.2177	BnaAnng04850D,BnaC03g55640D,BnaA09g53380D,BnaCnng08660D,BnaA06g11800D,BnaC03g26430D,BnaC03g68390D,BnaC05g04670D,BnaA06g18260D,BnaA06g05170D,BnaA09g44140D,BnaA03g18140D,BnaC07g01780D,BnaA08g14450D,BnaA07g14090D,BnaC09g46260D,BnaC03g04250D,BnaA02g06910D,BnaC08g25320D,BnaCnng17200D,BnaCnng10730D,BnaC02g44320D,BnaC06g05580D,BnaC06g02160D,BnaA04g17710D,BnaC01g26310D,BnaA04g16620D,BnaC05g27040D,BnaA03g…
GO:0044237	cellular metabolic process	biological_process	191	39262	0.0107778	0.0202835	1.08606	BnaA01g29180D,BnaA09g48990D,BnaC09g46780D,BnaA01g32370D,BnaC06g37280D,BnaC09g51330D,BnaAnng20950D,BnaC05g38810D,BnaC01g08380D,BnaA02g00250D,BnaC08g38580D,BnaA08g25530D,BnaA10g19130D,BnaA07g30700D,BnaC09g05860D,BnaC06g33550D,BnaA07g04420D,BnaC03g12060D,BnaA03g33320D,BnaC07g40800D,BnaC08g24550D,BnaA02g30990D,BnaC07g42640D,BnaC06g06670D,BnaA04g18800D,BnaC05g13850D,BnaA01g10650D,BnaA02g15950D,BnaA09g…
GO:0006281	DNA repair	biological_process	190	39262	2.11e-12	5.44e-12	1.26217	BnaC08g01210D,BnaA08g12640D,BnaA08g28170D,BnaA09g56480D,BnaA01g30360D,BnaAnng27110D,BnaAnng05280D,BnaA08g22780D,BnaA10g14690D,BnaCnng50230D,BnaA07g15840D,BnaA09g31540D,BnaA08g25700D,BnaAnng33860D,BnaA08g25530D,BnaA06g24690D,BnaA07g33630D,BnaC06g20150D,BnaA05g14830D,BnaA04g26950D,BnaA07g21780D,BnaC03g53260D,BnaA03g43310D,BnaC09g25510D,BnaC02g20480D,BnaAnng13370D,BnaAnng13690D,BnaA09g47840D,BnaC08g…
GO:0006913	nucleocytoplasmic transport	biological_process	182	39262	1.06e-09	2.71e-09	1.23273	BnaA06g35480D,BnaC03g09880D,BnaA08g02800D,BnaC08g35500D,BnaC08g38110D,BnaA08g08340D,BnaC06g00520D,BnaA08g04640D,BnaC02g31750D,BnaCnng13850D,BnaC09g34430D,BnaC07g02870D,BnaC08g03020D,BnaAnng31680D,BnaC03g17660D,BnaC09g35180D,BnaA10g26500D,BnaC07g20020D,BnaA06g30490D,BnaA05g18680D,BnaC08g25640D,BnaC03g76820D,BnaA05g04180D,BnaC03g24050D,BnaA10g04820D,BnaA08g08780D,BnaA09g42740D,BnaA04g04620D,BnaA01g…
GO:0006470	protein dephosphorylation	biological_process	167	39262	1.58e-06	3.87e-06	1.18944	BnaAnng03120D,BnaA05g09980D,BnaC01g10990D,BnaA10g24200D,BnaC01g06710D,BnaC07g32210D,BnaA06g40990D,BnaC04g14780D,BnaA03g40730D,BnaC08g23490D,BnaA06g04080D,BnaA10g30150D,BnaC07g40980D,BnaC04g09400D,BnaC05g36140D,BnaA04g03880D,BnaC01g23390D,BnaA05g12330D,BnaC04g44070D,BnaC05g04960D,BnaA10g26970D,BnaC04g25820D,BnaC08g33610D,BnaC02g17610D,BnaC04g44700D,BnaA03g51750D,BnaC03g67410D,BnaC03g16540D,BnaA05g…
GO:0006950	response to stress	biological_process	166	39262	0.892469	0.960221	0.947807	BnaA10g08090D,BnaA10g11610D,BnaA07g32420D,BnaA07g27690D,BnaA03g10450D,BnaA05g18880D,BnaC03g26110D,BnaA02g33970D,BnaAnng22000D,BnaC05g08690D,BnaA07g21490D,BnaA06g19180D,BnaC04g50550D,BnaC02g12700D,BnaA09g08850D,BnaA01g27460D,BnaC01g10320D,BnaA09g19430D,BnaA05g35570D,BnaC06g14990D,BnaA06g35280D,BnaC02g12680D,BnaA06g33590D,BnaC03g13470D,BnaC03g52660D,BnaA10g20620D,BnaA10g00310D,BnaC08g49290D,BnaA07g…
GO:0015979	photosynthesis	biological_process	165	39262	0.00600826	0.0117871	1.10139	BnaC01g21750D,BnaC05g32150D,BnaC03g50210D,BnaC01g09810D,BnaA06g04910D,BnaA09g25260D,BnaA02g32880D,BnaA07g04280D,BnaA09g43540D,BnaA07g17040D,BnaA04g16500D,BnaA10g04360D,BnaC05g32120D,BnaC06g35410D,BnaA10g27910D,BnaA08g05700D,BnaC03g60960D,BnaC09g27520D,BnaC04g41290D,BnaC09g00580D,BnaA01g28200D,BnaC09g27670D,BnaA05g23550D,BnaCnng49000D,BnaC07g11900D,BnaC08g07970D,BnaA07g39140D,BnaC09g45140D,BnaA07g…
GO:0006855	drug transmembrane transport	biological_process	163	39262	0.877888	0.95013	0.950313	BnaC03g18950D,BnaC03g64710D,BnaCnng41510D,BnaC03g59980D,BnaCnng48780D,BnaC03g68880D,BnaC01g41400D,BnaC01g09320D,BnaA09g13580D,BnaC03g49010D,BnaC07g41750D,BnaC06g00030D,BnaA01g14870D,BnaA07g29670D,BnaC05g25060D,BnaA07g23640D,BnaC09g40230D,BnaC01g30610D,BnaA02g04410D,BnaC08g39000D,BnaA08g10090D,BnaA08g31640D,BnaA03g02910D,BnaA10g05100D,BnaA10g07430D,BnaCnng68540D,BnaC06g27730D,BnaC08g40820D,BnaC07g…
GO:0007018	microtubule-based movement	biological_process	159	39262	1e-09	2.56e-09	1.24828	BnaC02g21300D,BnaA04g21400D,BnaA02g34890D,BnaA01g16240D,BnaA09g11080D,BnaC08g22570D,BnaA07g06290D,BnaC01g28200D,BnaA03g02940D,BnaC01g23900D,BnaA01g23610D,BnaC05g17090D,BnaA06g38870D,BnaC02g41890D,BnaA05g21080D,BnaC03g54520D,BnaAnng07580D,BnaC07g28380D,BnaA03g39840D,BnaC03g60320D,BnaC08g21620D,BnaA09g44600D,BnaC08g37310D,BnaA05g28490D,BnaC01g16000D,BnaC01g24300D,BnaA05g22780D,BnaA06g37260D,BnaC05g…
GO:0006396	RNA processing	biological_process	156	39262	4.17e-05	9.94e-05	1.16515	BnaC08g04140D,BnaA06g36080D,BnaA05g36690D,BnaC04g03230D,BnaCnng07570D,BnaA08g13850D,BnaC01g16180D,BnaA09g27560D,BnaA05g27100D,BnaC08g16250D,BnaC01g07260D,BnaC03g75880D,BnaA10g00800D,BnaA09g32580D,BnaC06g18980D,BnaC09g00720D,BnaC05g48080D,BnaC05g02260D,BnaCnng00540D,BnaA07g13920D,BnaC07g33050D,BnaCnng64810D,BnaA08g03640D,BnaC01g01030D,BnaC05g36400D,BnaA03g41890D,BnaC03g38170D,BnaCnng62950D,BnaA06g…
GO:0006096	glycolytic process	biological_process	146	39262	8.42e-06	2.04e-05	1.18667	BnaC04g22290D,BnaA08g21540D,BnaC08g24110D,BnaC03g03680D,BnaA07g00920D,BnaA09g16190D,BnaC03g50680D,BnaC08g35820D,BnaC03g37820D,BnaC02g42660D,BnaC06g19780D,BnaA09g51510D,BnaC04g23180D,BnaA03g10910D,BnaA03g36910D,BnaA05g07770D,BnaA07g32860D,BnaCnng32880D,BnaC04g08780D,BnaC03g20200D,BnaA05g12480D,BnaC01g05570D,BnaC03g43100D,BnaA03g40360D,BnaA06g22820D,BnaA02g27140D,BnaA01g07610D,BnaAnng29210D,BnaC01g…
GO:0006260	DNA replication	biological_process	140	39262	1.23e-05	2.94e-05	1.18677	BnaC03g67000D,BnaC03g31160D,BnaA08g21220D,BnaA03g46930D,BnaC02g32200D,BnaAnng16990D,BnaC08g48420D,BnaCnng58270D,BnaA03g02300D,BnaC04g48110D,BnaA08g25530D,BnaA01g09650D,BnaA02g24390D,BnaC05g23690D,BnaA09g25870D,BnaCnng78700D,BnaC07g30960D,BnaA06g04690D,BnaA06g23100D,BnaA07g17160D,BnaA09g47840D,BnaC07g28200D,BnaC02g14980D,BnaA02g13280D,BnaC03g50300D,BnaC05g43310D,BnaA08g12070D,BnaA10g27860D,BnaA10g…
GO:0006418	tRNA aminoacylation for protein translation	biological_process	136	39262	0.698903	0.789465	0.973664	BnaA03g25380D,BnaC09g03560D,BnaA07g08470D,BnaC04g38130D,BnaA03g28620D,BnaA09g56940D,BnaUnng00270D,BnaA10g17760D,BnaC03g75900D,BnaC03g50160D,BnaC03g73230D,BnaC06g18340D,BnaA06g28360D,BnaC05g39850D,BnaC04g31130D,BnaC03g59920D,BnaC05g20730D,BnaC04g33290D,BnaC08g26210D,BnaC08g15130D,BnaCnng19820D,BnaC03g75530D,BnaA07g17620D,BnaA05g27370D,BnaAnng09530D,BnaC07g43190D,BnaA01g33520D,BnaA10g30390D,BnaC04g…
GO:0000160	phosphorelay signal transduction system	biological_process	124	39262	0.904417	0.971284	0.936263	BnaA07g31820D,BnaA06g34070D,BnaC05g36490D,BnaA07g38280D,BnaCnng03230D,BnaA10g21570D,BnaA10g01920D,BnaC07g43590D,BnaC06g43070D,BnaC07g29960D,BnaC09g14930D,BnaC08g27330D,BnaC07g21260D,BnaC08g27970D,BnaC03g48210D,BnaA06g34500D,BnaC03g23280D,BnaCnng27490D,BnaC06g35700D,BnaA04g14760D,BnaA07g25770D,BnaCnng47460D,BnaA10g29230D,BnaA04g26750D,BnaA05g02140D,BnaA07g08880D,BnaCnng17810D,BnaA02g25910D,BnaC03g…
GO:0006520	cellular amino acid metabolic process	biological_process	115	39262	0.00026391	0.000600925	1.16839	BnaA01g04910D,BnaA05g18730D,BnaC03g19380D,BnaA04g28670D,BnaC07g43610D,BnaC03g77940D,BnaC07g38390D,BnaC01g09790D,BnaA03g56420D,BnaCnng21170D,BnaC04g41630D,BnaA01g34990D,BnaCnng34250D,BnaC09g32890D,BnaA03g46070D,BnaC09g51280D,BnaC01g15060D,BnaA07g21750D,BnaA02g09960D,BnaC01g06460D,BnaC06g04780D,BnaA08g13300D,BnaAnng31450D,BnaC08g43060D,BnaC02g13860D,BnaC03g04830D,BnaA09g25320D,BnaA08g10670D,BnaC04g…
GO:0042545	cell wall modification	biological_process	112	39262	1	1	0.69397	BnaCnng61650D,BnaC03g66720D,BnaA05g07650D,BnaA05g31580D,BnaA02g04440D,BnaA10g06710D,BnaC08g20880D,BnaC02g00700D,BnaUnng03540D,BnaC04g33340D,BnaCnng48920D,BnaA01g29470D,BnaA01g03620D,BnaA04g12290D,BnaA06g17460D,BnaC08g44200D,BnaA10g01400D,BnaCnng60500D,BnaA06g31060D,BnaA03g55910D,BnaA09g30050D,BnaA06g20930D,BnaC03g03910D,BnaA05g04610D,BnaA01g20750D,BnaC01g37010D,BnaC06g06610D,BnaA01g31490D,BnaC07g…
GO:0006413	translational initiation	biological_process	110	39262	0.00324551	0.00657096	1.13427	BnaC06g10680D,BnaC03g08790D,BnaA09g22010D,BnaC07g37640D,BnaC08g12430D,BnaA03g48450D,BnaA02g21800D,BnaC07g17810D,BnaA08g14130D,BnaC07g44180D,BnaCnng05700D,BnaA09g17080D,BnaC07g30320D,BnaC07g37590D,BnaCnng36550D,BnaA03g50490D,BnaA09g26760D,BnaC09g19990D,BnaA02g05130D,BnaC01g04940D,BnaC03g71830D,BnaA06g11550D,BnaA07g03280D,BnaA06g26640D,BnaCnng00690D,BnaA07g20800D,BnaA07g29270D,BnaA05g12740D,BnaC08g…
GO:0015991	ATP hydrolysis coupled proton transport	biological_process	109	39262	8.45e-06	2.05e-05	1.2146	BnaC09g12310D,BnaA09g12020D,BnaC07g15490D,BnaC09g10940D,BnaA09g46810D,BnaC04g10930D,BnaCnng12620D,BnaC01g04210D,BnaC08g12260D,BnaCnng57990D,BnaC04g28140D,BnaC04g33510D,BnaA03g02620D,BnaA09g02330D,BnaA09g00960D,BnaC03g67270D,BnaCnng26740D,BnaA10g22780D,BnaC07g33080D,BnaC03g30820D,BnaA01g04510D,BnaC09g01810D,BnaA07g20980D,BnaA02g09150D,BnaA06g14330D,BnaC01g18940D,BnaC05g37960D,BnaA07g11570D,BnaCnng…
GO:0006139	nucleobase-containing compound metabolic process	biological_process	105	39262	4.46e-05	0.000105996	1.19903	BnaAnng09470D,BnaCnng48290D,BnaA05g06070D,BnaA05g12040D,BnaCnng50230D,BnaA07g15840D,BnaA02g17350D,BnaCnng49030D,BnaA06g22680D,BnaC06g36330D,BnaA09g15880D,BnaA06g13610D,BnaC04g06280D,BnaCnng51120D,BnaC02g45240D,BnaA04g18800D,BnaA06g04690D,BnaA06g37110D,BnaC02g47890D,BnaA06g23100D,BnaC02g13740D,BnaA02g37120D,BnaC03g50300D,BnaC03g50940D,BnaA09g38260D,BnaC05g32360D,BnaA06g30580D,BnaA07g35880D,BnaC05g…
GO:0000079	regulation of cyclin-dependent protein serine/threonine kinase activity	biological_process	105	39262	9.76e-05	0.000227182	1.18921	BnaC09g47870D,BnaA05g04550D,BnaC09g03240D,BnaC06g19140D,BnaA06g23620D,BnaC02g07160D,BnaA03g21010D,BnaA05g17760D,BnaA02g30350D,BnaAnng23850D,BnaA07g18740D,BnaA02g03470D,BnaC07g45730D,BnaA03g57140D,BnaC03g58020D,BnaA04g25830D,BnaC06g37050D,BnaA06g14500D,BnaC04g05160D,BnaC01g44890D,BnaA06g28650D,BnaA10g21170D,BnaC07g26630D,BnaAnng02560D,BnaC09g12990D,BnaA01g10100D,BnaC06g00240D,BnaCnng52280D,BnaC08g…
GO:0006662	glycerol ether metabolic process	biological_process	104	39262	0.0518624	0.0845012	1.08046	BnaCnng05900D,BnaC05g43860D,BnaA08g04320D,BnaC04g26940D,BnaA04g20460D,BnaAnng12480D,BnaA06g02880D,BnaC06g15930D,BnaC01g25910D,BnaC08g42050D,BnaA05g00500D,BnaC08g25810D,BnaC07g50790D,BnaA05g33390D,BnaC06g30940D,BnaA09g50890D,BnaA03g46730D,BnaC07g49920D,BnaA07g28400D,BnaA09g55010D,BnaA01g32310D,BnaA06g13900D,BnaC08g22510D,BnaC01g42880D,BnaA10g24270D,BnaC09g17310D,BnaCnng46660D,BnaA01g00930D,BnaA01g…
GO:0044267	cellular protein metabolic process	biological_process	96	39262	0.224145	0.305551	1.03631	BnaA05g33440D,BnaC03g07550D,BnaA05g37290D,BnaA04g16190D,BnaA03g10770D,BnaA08g00450D,BnaAnng09440D,BnaA01g26860D,BnaC09g33020D,BnaA03g28450D,BnaC05g21040D,BnaC02g20500D,BnaA05g13740D,BnaCnng17840D,BnaA05g19100D,BnaA03g15330D,BnaC03g33580D,BnaA02g15290D,BnaC03g13440D,BnaC03g10340D,BnaA03g32840D,BnaCnng76000D,BnaC04g11280D,BnaC02g08340D,BnaC03g70570D,BnaA01g33840D,BnaC03g34470D,BnaA03g35570D,BnaC01g…
GO:0006486	protein glycosylation	biological_process	88	39262	0.172613	0.245269	1.04822	BnaC09g32770D,BnaC03g51620D,BnaC08g20240D,BnaC03g09700D,BnaC07g40490D,BnaA01g32830D,BnaA10g06690D,BnaC06g38340D,BnaC05g51320D,BnaA03g07700D,BnaCnng29350D,BnaC04g38250D,BnaC08g02710D,BnaC01g12450D,BnaA08g14250D,BnaC06g22770D,BnaA05g24590D,BnaA01g04800D,BnaA07g33720D,BnaA06g40900D,BnaA05g18450D,BnaA07g09130D,BnaA05g10880D,BnaA09g23290D,BnaC06g37140D,BnaC05g19620D,BnaC06g32350D,BnaC06g02690D,BnaC02g…
GO:0046854	phosphatidylinositol phosphorylation	biological_process	84	39262	0.000540356	0.00120209	1.18435	BnaC09g30760D,BnaA03g24140D,BnaC08g01360D,BnaC05g03750D,BnaC06g27120D,BnaA06g23130D,BnaC09g22270D,BnaA03g17220D,BnaA05g16200D,BnaA02g26080D,BnaA09g55680D,BnaC02g02510D,BnaA06g24020D,BnaA08g28260D,BnaA07g23440D,BnaC02g20620D,BnaA05g18480D,BnaC03g50280D,BnaAnng33950D,BnaA06g23220D,BnaC04g12830D,BnaAnng12860D,BnaC01g10530D,BnaC09g06200D,BnaA09g19960D,BnaA03g28170D,BnaAnng12830D,BnaA08g28320D,BnaA06g…
GO:0015986	ATP synthesis coupled proton transport	biological_process	83	39262	0.00253391	0.00525315	1.15843	BnaC09g19920D,BnaC06g08900D,BnaA01g04740D,BnaA09g20320D,BnaCnng12620D,BnaA05g15290D,BnaA02g24900D,BnaA03g02620D,BnaC06g16530D,BnaC04g28290D,BnaA01g25280D,BnaA01g34180D,BnaA03g36100D,BnaC08g16740D,BnaC07g32820D,BnaC02g47420D,BnaA03g24090D,BnaC09g25660D,BnaA10g22780D,BnaCnng12890D,BnaC09g43620D,BnaC08g23600D,BnaA01g15410D,BnaA03g41740D,BnaCnng66500D,BnaUnng03950D,BnaC03g18200D,BnaA02g20310D,BnaC05g…
GO:0051603	proteolysis involved in cellular protein catabolic process	biological_process	82	39262	6.52e-05	0.000153524	1.21831	BnaA05g17000D,BnaC04g18160D,BnaA02g19190D,BnaC05g09110D,BnaA08g24440D,BnaA01g05950D,BnaC04g17530D,BnaA04g01060D,BnaA03g22250D,BnaA06g15450D,BnaA09g31830D,BnaA08g03990D,BnaA09g15700D,BnaAnng29850D,BnaC08g22660D,BnaC04g38540D,BnaC06g41960D,BnaA06g32120D,BnaC03g67700D,BnaC03g56940D,BnaA05g14110D,BnaC09g17140D,BnaA03g60760D,BnaA07g20430D,BnaAnng21900D,BnaA01g18920D,BnaC07g04250D,BnaC06g39610D,BnaA07g…
GO:0006073	cellular glucan metabolic process	biological_process	81	39262	0.000945707	0.00206199	1.17812	BnaC03g67960D,BnaA01g06750D,BnaA01g15000D,BnaC07g42520D,BnaA06g07180D,BnaA08g06970D,BnaA03g50050D,BnaA09g01390D,BnaC07g02990D,BnaAnng03530D,BnaC07g39910D,BnaA03g10220D,BnaA03g47620D,BnaA02g35260D,BnaA07g01590D,BnaC01g11500D,BnaC04g08400D,BnaA10g11500D,BnaA02g22470D,BnaA03g25760D,BnaC01g08120D,BnaC03g55190D,BnaA03g38180D,BnaA03g43870D,BnaCnng62600D,BnaC02g11500D,BnaC02g11480D,BnaC03g67970D,BnaCnng…
GO:0035556	intracellular signal transduction	biological_process	81	39262	0.0107423	0.0202835	1.13052	BnaA01g07200D,BnaA06g22880D,BnaA04g10160D,BnaAnng36640D,BnaA07g15030D,BnaCnng67650D,BnaC07g01630D,BnaC03g12400D,BnaC03g03330D,BnaA08g24760D,BnaC09g33980D,BnaC03g23620D,BnaA06g08190D,BnaA09g35480D,BnaA04g06750D,BnaA09g47150D,BnaCnng22990D,BnaA05g07540D,BnaCnng42150D,BnaA05g29670D,BnaA04g02700D,BnaC09g34000D,BnaCnng22640D,BnaC05g44000D,BnaC09g12960D,BnaA05g16070D,BnaCnng05250D,BnaA03g19730D,BnaA03g…
GO:0006414	translational elongation	biological_process	78	39262	0.00163357	0.00346651	1.17148	BnaC02g11640D,BnaA09g26350D,BnaC09g00290D,BnaA07g13340D,BnaAnng17900D,BnaC09g44570D,BnaA02g29320D,BnaC03g30500D,BnaCnng34540D,BnaA03g24550D,BnaA02g08230D,BnaCnng01630D,BnaA02g06370D,BnaC08g42630D,BnaA03g26700D,BnaC05g37640D,BnaC04g03930D,BnaAnng24540D,BnaA05g29180D,BnaC04g39260D,BnaCnng24330D,BnaA10g00720D,BnaC04g16650D,BnaA03g22290D,BnaA05g29470D,BnaC09g26150D,BnaA09g51520D,BnaC05g00800D,BnaC04g…
GO:0006099	tricarboxylic acid cycle	biological_process	77	39262	0.000960542	0.00209156	1.18216	BnaC03g65310D,BnaC03g48410D,BnaA09g52600D,BnaC09g18140D,BnaCnng02920D,BnaC04g02430D,BnaA10g26650D,BnaA03g33640D,BnaC08g29490D,BnaA04g01840D,BnaC05g38590D,BnaC04g51900D,BnaC08g29460D,BnaA04g25660D,BnaA05g24610D,BnaA06g25230D,BnaCnng24040D,BnaA07g37420D,BnaC03g69540D,BnaC02g13370D,BnaA09g28740D,BnaA09g55280D,BnaC07g24280D,BnaA03g00820D,BnaC05g20500D,BnaC04g49560D,BnaA03g20770D,BnaC06g09980D,BnaC04g…
GO:0006887	exocytosis	biological_process	77	39262	0.00676773	0.0132612	1.14402	BnaA10g06080D,BnaA05g05960D,BnaC06g04710D,BnaC04g25700D,BnaA10g20330D,BnaA03g04630D,BnaCnng44410D,BnaC06g32800D,BnaC02g10670D,BnaCnng02750D,BnaA08g00910D,BnaA02g01950D,BnaC09g43940D,BnaCnng07830D,BnaA05g25360D,BnaAnng35640D,BnaA07g14030D,BnaA03g03950D,BnaA02g29900D,BnaC06g41930D,BnaA03g09290D,BnaC09g35070D,BnaC06g08890D,BnaA05g05940D,BnaA05g15270D,BnaC03g71400D,BnaA08g00920D,BnaA10g26490D,BnaC07g…
GO:0007017	microtubule-based process	biological_process	77	39262	0.0654066	0.104194	1.08566	BnaC09g37880D,BnaC09g44450D,BnaA02g31320D,BnaC03g75120D,BnaC06g41060D,BnaA07g10070D,BnaC03g22530D,BnaA06g17780D,BnaA10g15400D,BnaC08g06240D,BnaCnng62490D,BnaC02g29260D,BnaA02g04700D,BnaA05g09090D,BnaA10g20420D,BnaC02g31030D,BnaA03g44640D,BnaC04g54460D,BnaA09g30020D,BnaCnng51680D,BnaC03g09740D,BnaA08g01580D,BnaC03g68420D,BnaC03g69340D,BnaC05g50610D,BnaA03g07910D,BnaC05g18530D,BnaA10g09500D,BnaA07g…
GO:0006464	cellular protein modification process	biological_process	76	39262	0.000232213	0.000530219	1.20704	BnaAnng00510D,BnaA04g17280D,BnaC02g23950D,BnaC01g20980D,BnaC07g25480D,BnaC04g40890D,BnaA01g06090D,BnaC02g03460D,BnaA01g27290D,BnaC04g45970D,BnaCnng25500D,BnaA10g30270D,BnaC04g33460D,BnaC05g49020D,BnaC05g40700D,BnaC01g43970D,BnaA04g04910D,BnaC04g31740D,BnaA03g43090D,BnaC02g26300D,BnaC03g53200D,BnaAnng25310D,BnaA09g20850D,BnaA05g12250D,BnaC09g49100D,BnaC03g37540D,BnaC03g16630D,BnaA06g20880D,BnaC04g…
GO:0030036	actin cytoskeleton organization	biological_process	76	39262	0.0219144	0.0384085	1.11715	BnaA05g31750D,BnaC03g14440D,BnaAnng06370D,BnaC04g19570D,BnaC06g31250D,BnaA10g23430D,BnaC05g19270D,BnaC08g36570D,BnaAnng05100D,BnaC01g11730D,BnaC07g01460D,BnaC09g33660D,BnaC09g33170D,BnaC03g48530D,BnaC02g12130D,BnaA07g28670D,BnaA01g07530D,BnaA01g34880D,BnaC05g46330D,BnaA03g57840D,BnaC03g35330D,BnaCnng28150D,BnaC08g33650D,BnaC02g01460D,BnaAnng19920D,BnaAnng02650D,BnaA01g09980D,BnaA07g01010D,BnaC09g…
GO:0016998	cell wall macromolecule catabolic process	biological_process	74	39262	0.0180495	0.0323945	1.12362	BnaA09g15440D,BnaCnng01370D,BnaC04g48920D,BnaA04g13870D,BnaA05g03430D,BnaA04g25220D,BnaA02g02870D,BnaC07g49750D,BnaA10g03880D,BnaCnng39650D,BnaA08g21140D,BnaC03g24340D,BnaC05g03990D,BnaC05g40680D,BnaC03g37570D,BnaA08g01780D,BnaA03g20330D,BnaC03g24310D,BnaC05g01140D,BnaA10g23150D,BnaC03g77980D,BnaC03g24290D,BnaC04g36160D,BnaC08g01540D,BnaC08g25210D,BnaC03g47500D,BnaA03g56430D,BnaC09g41970D,BnaA04g…
GO:0008033	tRNA processing	biological_process	73	39262	0.00393681	0.00792181	1.15939	BnaA07g05540D,BnaC04g02780D,BnaA07g29200D,BnaA04g16010D,BnaA08g29550D,BnaA02g10840D,BnaC06g25870D,BnaC05g49020D,BnaC09g42040D,BnaC05g27190D,BnaA01g33060D,BnaC08g27280D,BnaA07g17620D,BnaAnng08610D,BnaC02g15060D,BnaA02g04650D,BnaA03g47570D,BnaC03g45200D,BnaA06g15690D,BnaC03g09910D,BnaC07g07870D,BnaA09g37290D,BnaA03g26500D,BnaA02g13860D,BnaA01g23650D,BnaC03g68890D,BnaCnng56440D,BnaC03g07360D,BnaC08g…
GO:0006364	rRNA processing	biological_process	73	39262	0.0208161	0.0365226	1.12075	BnaC09g45860D,BnaC09g14790D,BnaA03g35360D,BnaC04g02780D,BnaCnng69460D,BnaA02g10840D,BnaC09g45950D,BnaAnng25980D,BnaC07g45210D,BnaC03g25090D,BnaA03g25610D,BnaC01g18770D,BnaC02g15060D,BnaC02g27370D,BnaA03g47570D,BnaC09g52780D,BnaA03g01910D,BnaC02g12740D,BnaA06g35980D,BnaC09g45870D,BnaA05g19660D,BnaA05g00540D,BnaC03g72840D,BnaC03g30050D,BnaA03g56090D,BnaA10g10010D,BnaA08g31010D,BnaC08g47290D,BnaC07g…
GO:0009664	plant-type cell wall organization	biological_process	73	39262	0.842439	0.922698	0.933956	BnaA09g29940D,BnaCnng31520D,BnaA04g27750D,BnaCnng06330D,BnaA07g21170D,BnaC06g18710D,BnaA02g08750D,BnaAnng00290D,BnaUnng00730D,BnaA08g19680D,BnaC02g03580D,BnaA06g08040D,BnaC04g40170D,BnaAnng35810D,BnaAnng34230D,BnaA02g14340D,BnaA06g33850D,BnaC03g00640D,BnaC04g05770D,BnaCnng64440D,BnaA03g55050D,BnaAnng39600D,BnaCnng40260D,BnaC08g25360D,BnaA03g33850D,BnaC06g15300D,BnaCnng26780D,BnaC03g31460D,BnaA07g…
GO:0051726	regulation of cell cycle	biological_process	72	39262	8.6e-06	2.08e-05	1.25931	BnaC09g03240D,BnaC06g19140D,BnaC02g07160D,BnaA05g17760D,BnaA02g30350D,BnaAnng23850D,BnaA02g03470D,BnaC07g45730D,BnaA03g57140D,BnaC06g37050D,BnaA06g14500D,BnaA03g32200D,BnaC01g44890D,BnaC03g25090D,BnaA10g21170D,BnaC07g26630D,BnaC09g12990D,BnaC06g00240D,BnaCnng52280D,BnaC08g38790D,BnaA07g35680D,BnaC02g23150D,BnaA08g04010D,BnaA10g05310D,BnaA05g35600D,BnaCnng22930D,BnaC03g37490D,BnaC09g45350D,BnaC03g…
GO:0051258	protein polymerization	biological_process	71	39262	0.267651	0.357157	1.03267	BnaC09g37880D,BnaAnng41710D,BnaC09g44450D,BnaA02g31320D,BnaC03g75120D,BnaA03g53640D,BnaA06g17780D,BnaA10g15400D,BnaCnng62490D,BnaC02g29260D,BnaA05g09090D,BnaA10g20420D,BnaC02g31030D,BnaA03g44640D,BnaC04g54460D,BnaCnng51680D,BnaC03g09740D,BnaC03g68420D,BnaC05g50610D,BnaA10g09500D,BnaA07g32090D,BnaC04g10450D,BnaA03g07740D,BnaA08g02320D,BnaA06g20530D,BnaA09g17090D,BnaC08g23960D,BnaC02g09000D,BnaA08g…
GO:0008652	cellular amino acid biosynthetic process	biological_process	67	39262	1.96e-06	4.78e-06	1.28579	BnaA10g20010D,BnaC06g16700D,BnaA08g05070D,BnaA03g06790D,BnaC02g13450D,BnaCnng21170D,BnaA01g34990D,BnaC09g32890D,BnaA05g05760D,BnaC04g55460D,BnaC09g51280D,BnaC05g34420D,BnaA03g54190D,BnaC03g72600D,BnaA07g17940D,BnaC03g40610D,BnaA09g25320D,BnaC04g05620D,BnaA10g14580D,BnaC05g20190D,BnaC09g39920D,BnaA10g16880D,BnaC07g46690D,BnaA04g02330D,BnaC08g16430D,BnaC01g41040D,BnaC04g23500D,BnaC09g43800D,BnaA03g…
GO:0042254	ribosome biogenesis	biological_process	67	39262	0.00583844	0.0114676	1.15721	BnaA10g04390D,BnaC02g26240D,BnaA03g04950D,BnaA03g17540D,BnaC05g40730D,BnaA03g06930D,BnaA05g22630D,BnaC04g21140D,BnaA06g37580D,BnaC03g06550D,BnaC01g16790D,BnaA01g33870D,BnaC06g18630D,BnaA08g03640D,BnaA07g19460D,BnaC01g40380D,BnaC06g01190D,BnaA02g21230D,BnaA09g40190D,BnaC09g43570D,BnaA04g21760D,BnaA05g29180D,BnaCnng24330D,BnaC05g26360D,BnaA03g25240D,BnaA09g20820D,BnaA05g26710D,BnaCnng43190D,BnaAnng…
GO:0008610	lipid biosynthetic process	biological_process	65	39262	0.774761	0.864116	0.945403	BnaA08g11060D,BnaCnng52900D,BnaC01g05130D,BnaCnng58900D,BnaA01g03770D,BnaAnng15520D,BnaC04g00710D,BnaC01g04130D,BnaC07g05570D,BnaA07g06520D,BnaC04g15590D,BnaA03g37090D,BnaC08g46130D,BnaC03g43340D,BnaC07g45160D,BnaA03g51030D,BnaA06g36580D,BnaC09g10800D,BnaCnng54600D,BnaC09g13240D,BnaC05g02350D,BnaC01g03770D,BnaA09g28510D,BnaC08g36720D,BnaC05g00780D,BnaC07g17300D,BnaA10g02480D,BnaA01g02510D,BnaA03g…
GO:0008299	isoprenoid biosynthetic process	biological_process	64	39262	0.000181688	0.000417755	1.22822	BnaCnng74570D,BnaC07g03180D,BnaA05g09170D,BnaC03g33140D,BnaA09g41820D,BnaCnng23810D,BnaC05g39040D,BnaA06g35250D,BnaA07g39140D,BnaA05g33360D,BnaA02g21580D,BnaA05g18970D,BnaC09g51100D,BnaA09g21330D,BnaAnng12740D,BnaC09g03160D,BnaC05g13160D,BnaA06g22280D,BnaC09g54000D,BnaC09g23740D,BnaCnng57390D,BnaC02g34570D,BnaA05g18910D,BnaCnng23390D,BnaC03g51460D,BnaC06g37290D,BnaA02g31160D,BnaA03g28110D,BnaA10g…
GO:0016311	dephosphorylation	biological_process	64	39262	0.0171534	0.0310232	1.13374	BnaAnng00980D,BnaA03g40730D,BnaC08g23490D,BnaC04g09400D,BnaA10g18040D,BnaC04g44700D,BnaC02g02660D,BnaA05g08340D,BnaC05g03030D,BnaA07g04540D,BnaC04g25620D,BnaA01g23680D,BnaC03g00320D,BnaC04g11740D,BnaA10g25650D,BnaA05g27980D,BnaC09g22970D,BnaA04g19120D,BnaC03g19530D,BnaC03g33150D,BnaCnng24280D,BnaC01g33400D,BnaC09g33180D,BnaA01g31580D,BnaCnng41960D,BnaAnng12460D,BnaCnng56880D,BnaA07g29650D,BnaA03g…
GO:0006807	nitrogen compound metabolic process	biological_process	63	39262	7.73e-05	0.000181535	1.24357	BnaCnng75490D,BnaC09g06340D,BnaA07g15990D,BnaA03g19380D,BnaC05g35690D,BnaA03g10890D,BnaC04g29670D,BnaCnng63090D,BnaA08g00710D,BnaC06g14440D,BnaCnng57900D,BnaC02g45820D,BnaC03g23220D,BnaA06g10110D,BnaC09g25430D,BnaA03g03750D,BnaA02g13220D,BnaAnng15120D,BnaA04g23740D,BnaC05g11730D,BnaC04g10280D,BnaCnng23850D,BnaC04g47520D,BnaC04g30250D,BnaA05g08870D,BnaAnng27730D,BnaC03g49800D,BnaA09g06820D,BnaC03g…
GO:0030163	protein catabolic process	biological_process	62	39262	7.46e-06	1.81e-05	1.27863	BnaC04g40250D,BnaC06g06550D,BnaC02g30020D,BnaC04g38280D,BnaC09g34110D,BnaA09g49390D,BnaA03g29050D,BnaA10g04190D,BnaA10g12010D,BnaC03g56360D,BnaAnng02470D,BnaA05g11730D,BnaC05g46270D,BnaC07g41720D,BnaC08g33120D,BnaC09g33780D,BnaA05g05880D,BnaA03g09830D,BnaA06g36950D,BnaA04g15330D,BnaC05g04410D,BnaA04g16890D,BnaC04g54290D,BnaCnng37900D,BnaA07g26630D,BnaA10g18890D,BnaC04g05740D,BnaA02g35670D,BnaA02g…
GO:0043086	negative regulation of catalytic activity	biological_process	62	39262	1	1	0.639314	BnaA09g25920D,BnaA02g07220D,BnaA02g26740D,BnaA03g57660D,BnaA09g52920D,BnaA10g00170D,BnaAnng25710D,BnaC01g37240D,BnaAnng10120D,BnaC01g08350D,BnaA05g25390D,BnaC02g29110D,BnaA09g24110D,BnaA01g10620D,BnaA05g25190D,BnaC07g01060D,BnaC04g38660D,BnaC09g24660D,BnaC07g04280D,BnaAnng14520D,BnaC09g01070D,BnaC02g10210D,BnaC07g02390D,BnaC09g18640D,BnaC06g32960D,BnaC07g15930D,BnaC05g39370D,BnaC02g29120D,BnaA03g…
GO:0006397	mRNA processing	biological_process	60	39262	0.00256079	0.00530219	1.18435	BnaC03g47810D,BnaA06g25800D,BnaC01g28840D,BnaA08g15370D,BnaC08g00240D,BnaA05g27100D,BnaA07g03330D,BnaC03g61880D,BnaA02g00220D,BnaA10g22290D,BnaC02g00650D,BnaC01g34430D,BnaC05g02260D,BnaC09g14390D,BnaCnng64810D,BnaCnng52160D,BnaCnng51880D,BnaA05g21980D,BnaA01g26950D,BnaC03g00320D,BnaA08g12360D,BnaC01g38570D,BnaC04g54780D,BnaC07g30070D,BnaA08g27430D,BnaA08g22960D,BnaA05g12710D,BnaCnng15550D,BnaC05g…
GO:0016070	RNA metabolic process	biological_process	58	39262	0.136684	0.200454	1.06855	BnaC01g11440D,BnaC02g11150D,BnaA05g12850D,BnaC07g37640D,BnaC07g42840D,BnaA02g19360D,BnaCnng34910D,BnaC05g18000D,BnaA01g06380D,BnaA08g08950D,BnaC02g07620D,BnaC03g62940D,BnaA07g20170D,BnaA01g14150D,BnaA07g20800D,BnaC02g16470D,BnaC09g08560D,BnaC04g22320D,BnaC06g42190D,BnaC07g13510D,BnaA07g35190D,BnaC05g04680D,BnaC03g74850D,BnaC04g37540D,BnaC06g16540D,BnaC06g20650D,BnaUnng02290D,BnaC02g25940D,BnaC06g…
GO:0030244	cellulose biosynthetic process	biological_process	57	39262	0.99932	1	0.787594	BnaC07g50180D,BnaA06g36370D,BnaA09g06990D,BnaAnng16810D,BnaA10g17590D,BnaA02g02720D,BnaA03g06610D,BnaC07g17610D,BnaC09g06600D,BnaC02g06160D,BnaC09g40960D,BnaC01g06090D,BnaA03g55860D,BnaA01g04600D,BnaC06g11110D,BnaAnng01240D,BnaC05g01400D,BnaA05g32300D,BnaA03g58390D,BnaC09g42220D,BnaC03g02050D,BnaA05g13550D,BnaC05g28920D,BnaA03g27800D,BnaC03g07130D,BnaA10g01360D,BnaC09g41420D,BnaC03g36310D,BnaC03g…
GO:0015992	proton transport	biological_process	56	39262	0.0109035	0.0204394	1.15489	BnaA08g31200D,BnaC07g15490D,BnaCnng12620D,BnaA03g02620D,BnaC02g21910D,BnaA06g10340D,BnaCnng26740D,BnaA10g22780D,BnaA03g27500D,BnaCnng66360D,BnaA06g14330D,BnaC05g37960D,BnaA07g11570D,BnaC06g39350D,BnaC05g11930D,BnaC09g27590D,BnaC01g27960D,BnaA03g02630D,BnaA07g38430D,BnaCnng64390D,BnaA05g33890D,BnaC06g36660D,BnaCnng12600D,BnaC08g38730D,BnaA03g58730D,BnaAnng06000D,BnaC09g47330D,BnaCnng05660D,BnaC01g…
GO:0006888	ER to Golgi vesicle-mediated transport	biological_process	55	39262	1.07e-05	2.58e-05	1.28807	BnaCnng03550D,BnaC08g36100D,BnaA06g39000D,BnaA05g30470D,BnaA09g17250D,BnaCnng01340D,BnaC04g29030D,BnaA09g43020D,BnaC08g49290D,BnaAnng30560D,BnaA08g02090D,BnaA10g27220D,BnaC03g00670D,BnaC05g44870D,BnaC07g47710D,BnaA06g02480D,BnaC05g09520D,BnaA07g35560D,BnaC06g04400D,BnaA06g40850D,BnaC03g25180D,BnaC09g18320D,BnaC09g00930D,BnaC03g77750D,BnaA09g43520D,BnaA03g29840D,BnaC03g59930D,BnaC08g01290D,BnaC04g…
GO:0048544	recognition of pollen	biological_process	55	39262	1	1	0.644033	BnaC01g19480D,BnaC08g14760D,BnaCnng04150D,BnaC07g30350D,BnaC03g72660D,BnaA09g13720D,BnaA04g14930D,BnaA08g25330D,BnaC09g09850D,BnaC04g13630D,BnaA03g60150D,BnaC01g41150D,BnaA06g06990D,BnaA01g11220D,BnaCnng04390D,BnaA01g22760D,BnaC01g29480D,BnaC08g42090D,BnaCnng02640D,BnaA07g02450D,BnaC01g19460D,BnaA08g25370D,BnaC08g14740D,BnaCnng69790D,BnaA03g19850D,BnaC05g08640D,BnaCnng02410D,BnaC01g43340D,BnaA01g…
GO:0019538	protein metabolic process	biological_process	54	39262	1.87e-08	4.69e-08	1.35662	BnaC09g52740D,BnaA03g41820D,BnaA09g32950D,BnaC09g23500D,BnaCnng51760D,BnaCnng70640D,BnaA08g18590D,BnaA07g31420D,BnaC03g58290D,BnaC07g32910D,BnaA09g21130D,BnaA10g11160D,BnaC06g05520D,BnaC09g27270D,BnaCnng73830D,BnaA09g41570D,BnaA10g11620D,BnaC03g16140D,BnaC09g42450D,BnaA02g35350D,BnaC04g28150D,BnaC06g23110D,BnaC02g31590D,BnaA01g20520D,BnaA03g47340D,BnaA04g05400D,BnaA09g55830D,BnaA04g14130D,BnaC03g…
GO:0009116	nucleoside metabolic process	biological_process	54	39262	0.000211914	0.000486574	1.24357	BnaC07g37320D,BnaA09g54930D,BnaA08g18960D,BnaA09g27900D,BnaA07g03650D,BnaA07g16410D,BnaAnng15380D,BnaA02g00860D,BnaC05g28770D,BnaC06g42560D,BnaA05g08630D,BnaC06g32720D,BnaC03g65030D,BnaA03g45390D,BnaC09g45400D,BnaA07g16160D,BnaA10g21290D,BnaC05g08230D,BnaC03g60190D,BnaA07g29530D,BnaC04g49680D,BnaA01g07970D,BnaA06g06560D,BnaC03g23950D,BnaC07g47600D,BnaC08g24880D,BnaCnng35810D,BnaA08g16900D,BnaC01g…
GO:0006811	ion transport	biological_process	53	39262	0.43813	0.539136	1.00318	BnaA04g14030D,BnaA03g50250D,BnaA03g28160D,BnaC04g16000D,BnaC08g33320D,BnaC04g36270D,BnaA09g17910D,BnaA03g57170D,BnaC06g16330D,BnaA01g06670D,BnaC04g37620D,BnaA09g41300D,BnaCnng16060D,BnaC03g59720D,BnaC03g31050D,BnaCnng47090D,BnaC07g42730D,BnaA05g22550D,BnaC04g38170D,BnaA04g14530D,BnaA10g18740D,BnaA06g36090D,BnaC09g00810D,BnaC03g40070D,BnaCnng40090D,BnaC01g34960D,BnaA02g07990D,BnaC04g36890D,BnaC05g…
GO:0006284	base-excision repair	biological_process	52	39262	3.57e-08	8.93e-08	1.35567	BnaA09g56480D,BnaA01g30360D,BnaC05g41040D,BnaA09g31540D,BnaA05g14830D,BnaA07g21780D,BnaC02g20480D,BnaC01g25220D,BnaC01g38620D,BnaC01g04300D,BnaA02g22810D,BnaC08g44470D,BnaA06g13680D,BnaA07g00790D,BnaAnng32020D,BnaC01g34030D,BnaC02g31120D,BnaC02g46050D,BnaA05g07800D,BnaC04g08810D,BnaC06g22490D,BnaC06g35890D,BnaC04g29530D,BnaA05g26980D,BnaC05g17040D,BnaA05g21520D,BnaA01g26640D,BnaA07g35250D,BnaC08g…
GO:0006357	regulation of transcription from RNA polymerase II promoter	biological_process	51	39262	0.000435423	0.000972602	1.2363	BnaC05g47070D,BnaA09g05430D,BnaCnng37990D,BnaC02g45240D,BnaC02g13740D,BnaA03g07970D,BnaC04g06710D,BnaAnng18420D,BnaCnng05620D,BnaC05g12530D,BnaA07g13720D,BnaC03g32110D,BnaAnng06230D,BnaA07g09420D,BnaA10g26710D,BnaA10g25940D,BnaCnng02320D,BnaA05g27780D,BnaA06g00390D,BnaA03g17870D,BnaC05g20130D,BnaC03g28100D,BnaC05g51820D,BnaA05g36640D,BnaC02g03270D,BnaC02g01260D,BnaA03g23640D,BnaC07g12340D,BnaC03g…
GO:0006032	chitin catabolic process	biological_process	51	39262	0.105503	0.157535	1.08414	BnaA09g15440D,BnaCnng01370D,BnaC04g48920D,BnaA05g03430D,BnaA04g25220D,BnaC03g31740D,BnaA10g03880D,BnaCnng39650D,BnaC03g24340D,BnaC05g03990D,BnaC05g40680D,BnaC03g37570D,BnaA03g20330D,BnaC03g24310D,BnaC05g01140D,BnaC03g24290D,BnaC08g01540D,BnaC08g25210D,BnaA03g56430D,BnaA04g25230D,BnaC03g37600D,BnaA03g20340D,BnaC09g51720D,BnaA08g31740D,BnaA08g09330D,BnaC04g49100D,BnaA03g20310D,BnaA01g30550D,BnaA03g…
GO:0006857	oligopeptide transport	biological_process	50	39262	0.0503705	0.0821519	1.11431	BnaC02g17990D,BnaA05g06730D,BnaA09g34320D,BnaCnng48110D,BnaA09g47380D,BnaC07g16870D,BnaA07g10390D,BnaC07g21430D,BnaA08g24900D,BnaA09g30570D,BnaC06g14960D,BnaA02g15780D,BnaA07g12830D,BnaC02g34280D,BnaA09g18920D,BnaCnng61860D,BnaC04g17300D,BnaC04g07600D,BnaC08g15370D,BnaA09g54940D,BnaC07g13630D,BnaA04g04310D,BnaA04g04460D,BnaA02g01590D,BnaA01g26960D,BnaA06g09430D,BnaC05g17820D,BnaCnng04540D,BnaC04g…
GO:0009451	RNA modification	biological_process	49	39262	9.44e-08	2.34e-07	1.35411	BnaC06g36680D,BnaCnng07570D,BnaA03g59520D,BnaA06g14390D,BnaAnng31530D,BnaC08g42540D,BnaC05g07250D,BnaC01g02320D,BnaC03g34990D,BnaC06g33200D,BnaA07g32340D,BnaC07g32770D,BnaC07g15400D,BnaCnng52450D,BnaA03g41690D,BnaC03g16800D,BnaA05g06100D,BnaCnng63670D,BnaC09g43050D,BnaA09g23260D,BnaC05g15750D,BnaA03g28800D,BnaC01g13110D,BnaA03g13850D,BnaC04g06310D,BnaA10g19290D,BnaA01g11600D,BnaA09g48300D,BnaC03g…
GO:0007186	G-protein coupled receptor signaling pathway	biological_process	48	39262	7.16e-05	0.000168293	1.27546	BnaA08g11230D,BnaA03g14960D,BnaA10g14860D,BnaA05g10840D,BnaA08g29720D,BnaA05g16520D,BnaC01g04010D,BnaA03g36890D,BnaC05g24110D,BnaC04g35930D,BnaA01g24300D,BnaA04g16910D,BnaC08g46160D,BnaAnng12540D,BnaA09g32030D,BnaA01g02740D,BnaC08g41460D,BnaC08g44070D,BnaC05g03240D,BnaCnng51940D,BnaC03g10200D,BnaC04g12400D,BnaC03g66160D,BnaCnng55440D,BnaC08g32820D,BnaC04g20670D,BnaC03g43060D,BnaC07g45020D,BnaC08g…
GO:0008219	cell death	biological_process	48	39262	0.0119853	0.02234	1.16357	BnaCnng31840D,BnaA03g18460D,BnaC07g38850D,BnaC08g49800D,BnaC03g21930D,BnaA03g46560D,BnaA03g18430D,BnaA09g47670D,BnaC05g20070D,BnaC09g30190D,BnaCnng04240D,BnaC07g06510D,BnaAnng39980D,BnaC01g29530D,BnaC08g14820D,BnaC02g27050D,BnaCnng33250D,BnaA09g29170D,BnaC02g14090D,BnaA03g60240D,BnaA05g10530D,BnaA10g07000D,BnaA09g09140D,BnaA03g18470D,BnaA01g22680D,BnaC03g21940D,BnaA09g00940D,BnaA08g25340D,BnaA09g…
GO:0015693	magnesium ion transport	biological_process	48	39262	0.0119853	0.02234	1.16357	BnaA09g55390D,BnaC02g25960D,BnaC02g20850D,BnaA06g10710D,BnaA10g20650D,BnaC07g23760D,BnaC01g33220D,BnaAnng21200D,BnaC03g60150D,BnaC05g34100D,BnaAnng21960D,BnaC08g36020D,BnaA06g23540D,BnaCnng47920D,BnaCnng30470D,BnaA06g32730D,BnaA07g35210D,BnaA02g19370D,BnaC06g06680D,BnaA02g15640D,BnaA08g16930D,BnaA10g13720D,BnaA04g06610D,BnaC09g44670D,BnaA04g11960D,BnaC09g06390D,BnaC05g12220D,BnaA06g39860D,BnaC02g…
GO:0044262	cellular carbohydrate metabolic process	biological_process	48	39262	0.0671448	0.106447	1.10539	BnaA02g00100D,BnaA04g13230D,BnaC08g29490D,BnaA04g01840D,BnaC08g29460D,BnaA04g25660D,BnaA09g55280D,BnaCnng15110D,BnaC02g00740D,BnaA10g02560D,BnaC04g49560D,BnaA10g10850D,BnaA03g20770D,BnaC04g22440D,BnaA01g17800D,BnaC03g78200D,BnaA04g01390D,BnaA03g43000D,BnaC04g35330D,BnaA02g30820D,BnaCnng29330D,BnaC02g39080D,BnaA09g55310D,BnaA05g14590D,BnaC09g02690D,BnaA06g01050D,BnaC07g27210D,BnaA09g16400D,BnaC03g…
GO:0009725	response to hormone	biological_process	48	39262	0.34951	0.447156	1.02036	BnaCnng54100D,BnaA06g13320D,BnaA07g13830D,BnaC06g20640D,BnaA03g49980D,BnaA06g14040D,BnaA01g13580D,BnaC07g48490D,BnaA09g05840D,BnaC09g37130D,BnaC04g18710D,BnaC08g18670D,BnaC03g52090D,BnaC04g15900D,BnaA05g01310D,BnaA08g22150D,BnaA07g11660D,BnaC03g59640D,BnaA08g17390D,BnaC08g19040D,BnaA05g09790D,BnaA10g13260D,BnaC07g42330D,BnaC01g08330D,BnaA03g46370D,BnaA10g14760D,BnaCnng05140D,BnaA07g20790D,BnaA08g…
GO:0009607	response to biotic stimulus	biological_process	48	39262	0.964536	1	0.861346	BnaC08g06150D,BnaA01g31910D,BnaA08g20250D,BnaAnng20750D,BnaA10g14950D,BnaC07g13250D,BnaC07g48800D,BnaC06g31980D,BnaC06g24430D,BnaAnng32860D,BnaA08g20660D,BnaCnng51700D,BnaA01g13350D,BnaA02g15230D,BnaC08g06160D,BnaA07g23680D,BnaC02g20370D,BnaA07g28930D,BnaA06g34860D,BnaC06g32000D,BnaC02g20340D,BnaA09g30090D,BnaC09g52200D,BnaUnng02720D,BnaC09g37310D,BnaC07g50250D,BnaA08g20670D,BnaA03g46170D,BnaAnng…
GO:0071805	potassium ion transmembrane transport	biological_process	47	39262	0.0476022	0.0779463	1.11969	BnaA10g09810D,BnaA08g08020D,BnaUnng04310D,BnaC06g15440D,BnaC04g14750D,BnaA03g43630D,BnaA05g12300D,BnaA04g23330D,BnaC01g41320D,BnaC03g76940D,BnaA03g11290D,BnaC04g01430D,BnaA03g44320D,BnaA07g16500D,BnaA01g13320D,BnaC01g40790D,BnaC06g31400D,BnaC09g32260D,BnaC03g16580D,BnaC07g35120D,BnaC01g04660D,BnaC02g19780D,BnaCnng46720D,BnaA01g10310D,BnaCnng05490D,BnaC01g15360D,BnaC07g36130D,BnaA01g03380D,BnaC04g…
GO:0006108	malate metabolic process	biological_process	46	39262	0.00841399	0.0162354	1.17704	BnaC02g03980D,BnaA09g51860D,BnaC03g12430D,BnaA03g27070D,BnaA02g00100D,BnaC07g29000D,BnaA04g13230D,BnaC09g33800D,BnaCnng60330D,BnaC09g08590D,BnaA07g21550D,BnaC06g22080D,BnaA03g09800D,BnaCnng15110D,BnaC02g00740D,BnaA10g02560D,BnaC07g01180D,BnaA10g10850D,BnaC03g78200D,BnaA06g27940D,BnaC04g35330D,BnaCnng02240D,BnaCnng29330D,BnaA05g14590D,BnaA06g01050D,BnaA03g03440D,BnaA09g16400D,BnaC03g65500D,BnaC05g…
GO:0016043	cellular component organization	biological_process	46	39262	0.0172654	0.0311574	1.15564	BnaA05g31750D,BnaC03g14440D,BnaAnng06370D,BnaC06g31250D,BnaA10g23430D,BnaC05g19270D,BnaAnng05100D,BnaC09g33660D,BnaC03g48530D,BnaA07g28670D,BnaC05g46330D,BnaA03g57840D,BnaC03g35330D,BnaCnng28150D,BnaC08g33650D,BnaC02g01460D,BnaC09g48100D,BnaA03g30060D,BnaCnng66830D,BnaC01g28450D,BnaA06g30270D,BnaA03g11760D,BnaA06g25040D,BnaA09g41090D,BnaC07g26440D,BnaC03g03230D,BnaC04g03100D,BnaC03g34250D,BnaA01g…
GO:0001522	pseudouridine synthesis	biological_process	45	39262	3.44e-07	8.48e-07	1.35171	BnaC06g36680D,BnaCnng07570D,BnaA03g59520D,BnaA06g14390D,BnaAnng31530D,BnaC08g42540D,BnaC05g07250D,BnaC03g34990D,BnaA07g32340D,BnaC07g32770D,BnaC07g15400D,BnaCnng52450D,BnaA03g41690D,BnaC03g16800D,BnaA05g06100D,BnaCnng63670D,BnaC09g43050D,BnaA09g23260D,BnaC05g15750D,BnaA03g28800D,BnaC01g13110D,BnaA03g13850D,BnaC04g06310D,BnaA10g19290D,BnaA01g11600D,BnaA09g48300D,BnaC03g33930D,BnaC03g16060D,BnaC02g…
GO:0008654	phospholipid biosynthetic process	biological_process	44	39262	0.000748692	0.00164993	1.24075	BnaC09g14000D,BnaA07g16610D,BnaCnng14450D,BnaC05g09920D,BnaC06g15590D,BnaC06g26180D,BnaC01g17900D,BnaA08g17030D,BnaA07g24850D,BnaC03g22010D,BnaA04g12720D,BnaA09g46210D,BnaC08g25880D,BnaA03g18520D,BnaCnng60250D,BnaA07g07240D,BnaC03g60040D,BnaA02g27520D,BnaA02g13510D,BnaA04g03890D,BnaAnng13400D,BnaA02g00400D,BnaC04g25830D,BnaC09g22540D,BnaA03g50320D,BnaA06g33540D,BnaC02g00460D,BnaC02g35520D,BnaC04g…
GO:0006479	protein methylation	biological_process	44	39262	0.00559459	0.0111081	1.19209	BnaC01g32820D,BnaC01g07310D,BnaA06g23300D,BnaC03g37480D,BnaA03g51290D,BnaC02g15920D,BnaC02g13910D,BnaA01g35410D,BnaC03g66320D,BnaAnng36410D,BnaC03g76770D,BnaC03g77370D,BnaA06g29740D,BnaA05g26770D,BnaA02g11410D,BnaA02g10000D,BnaC07g01550D,BnaAnng21610D,BnaC05g32500D,BnaC02g38900D,BnaC01g09010D,BnaC07g27000D,BnaC03g50020D,BnaA02g30530D,BnaC05g45040D,BnaA03g32190D,BnaA08g12690D,BnaA07g01100D,BnaC03g…
GO:0005992	trehalose biosynthetic process	biological_process	44	39262	0.232351	0.31543	1.04822	BnaA08g20280D,BnaC01g43070D,BnaA01g22200D,BnaAnng04500D,BnaA07g34230D,BnaC03g60640D,BnaA02g18730D,BnaCnng42030D,BnaAnng33310D,BnaC06g38600D,BnaA08g16230D,BnaAnng22210D,BnaC06g39000D,BnaA06g24090D,BnaA02g34580D,BnaC09g25400D,BnaA10g07960D,BnaA06g37150D,BnaC01g14030D,BnaC08g06450D,BnaA07g33960D,BnaA03g43320D,BnaA02g18740D,BnaA08g28610D,BnaA03g54540D,BnaC08g01800D,BnaC07g46980D,BnaC06g26160D,BnaA03g…
GO:0006869	lipid transport	biological_process	44	39262	0.997114	1	0.789568	BnaC02g10060D,BnaC04g51000D,BnaC04g45500D,BnaC03g36390D,BnaA03g17860D,BnaA02g34050D,BnaA05g29430D,BnaA03g09540D,BnaA09g32110D,BnaC03g50130D,BnaC07g32300D,BnaCnng42990D,BnaA04g22070D,BnaA10g30240D,BnaA03g31060D,BnaC02g01510D,BnaAnng06400D,BnaC01g23300D,BnaAnng27610D,BnaC08g22920D,BnaA01g19350D,BnaC04g45800D,BnaA04g21650D,BnaA04g22080D,BnaA06g23230D,BnaA02g07120D,BnaA03g38500D,BnaA04g29630D,BnaA05g…
GO:0006535	cysteine biosynthetic process from serine	biological_process	43	39262	0.00026963	0.0006131	1.26415	BnaAnng27260D,BnaC03g70970D,BnaC05g46930D,BnaC09g02930D,BnaA05g26160D,BnaCnng25480D,BnaC04g21780D,BnaC09g33290D,BnaA05g03520D,BnaC06g11170D,BnaA06g00120D,BnaAnng11450D,BnaA01g34070D,BnaA08g00140D,BnaC04g22760D,BnaAnng28500D,BnaC09g02940D,BnaC03g13300D,BnaC05g46910D,BnaA03g28870D,BnaC04g49280D,BnaA10g10890D,BnaC04g10980D,BnaC08g09930D,BnaC01g22710D,BnaA04g00700D,BnaC02g39510D,BnaC05g40290D,BnaA03g…
GO:0006259	DNA metabolic process	biological_process	43	39262	0.00277591	0.0057188	1.21255	BnaAnng27110D,BnaA10g14690D,BnaA09g20790D,BnaC06g20150D,BnaA04g16480D,BnaA01g07960D,BnaCnng56400D,BnaC04g39830D,BnaC04g33140D,BnaC08g36690D,BnaA09g11340D,BnaC09g11780D,BnaC03g35730D,BnaC07g01720D,BnaC03g70890D,BnaC03g10310D,BnaCnng55870D,BnaA01g24420D,BnaA09g42800D,BnaA03g31350D,BnaC03g36740D,BnaA01g29970D,BnaC08g35310D,BnaC09g37020D,BnaC09g30690D,BnaA10g26920D,BnaC01g09540D,BnaC04g04170D,BnaCnng…
GO:0006289	nucleotide-excision repair	biological_process	43	39262	0.0521298	0.0847689	1.12104	BnaC08g01210D,BnaA08g28170D,BnaC05g12320D,BnaAnng33860D,BnaA04g08670D,BnaC05g09430D,BnaA05g14830D,BnaA06g25920D,BnaCnng26250D,BnaC05g14080D,BnaCnng32650D,BnaA01g02130D,BnaA04g11110D,BnaC07g24890D,BnaC04g30910D,BnaC03g33000D,BnaA07g14440D,BnaA02g03190D,BnaA08g27380D,BnaA07g20230D,BnaA06g10810D,BnaC05g17040D,BnaA09g56400D,BnaA06g31700D,BnaA02g14670D,BnaC08g00170D,BnaC06g19700D,BnaC08g38480D,BnaC07g…
GO:0006814	sodium ion transport	biological_process	42	39262	7.75e-05	0.000181771	1.28963	BnaC09g20290D,BnaA07g35030D,BnaA03g24950D,BnaA07g20250D,BnaC05g46790D,BnaA06g35450D,BnaC06g38980D,BnaC07g20310D,BnaA07g04860D,BnaA09g21160D,BnaC06g19720D,BnaA03g45590D,BnaC09g44170D,BnaC03g73000D,BnaC07g37650D,BnaA10g30010D,BnaC09g23540D,BnaA09g03600D,BnaC02g42990D,BnaC04g06630D,BnaA05g06370D,BnaA05g32130D,BnaA02g25550D,BnaC06g39970D,BnaC09g23550D,BnaA05g30980D,BnaA09g18360D,BnaC02g39630D,BnaC09g…
GO:0006614	SRP-dependent cotranslational protein targeting to membrane	biological_process	42	39262	0.00347135	0.00700234	1.20903	BnaA07g24930D,BnaA06g19200D,BnaC01g07800D,BnaA05g03460D,BnaC06g28700D,BnaA08g02950D,BnaC03g24370D,BnaC02g02830D,BnaA06g16170D,BnaC04g49120D,BnaCnng77880D,BnaAnng00870D,BnaC05g11610D,BnaA10g26220D,BnaA04g25260D,BnaA07g26580D,BnaA06g03460D,BnaA01g06530D,BnaA08g03500D,BnaC07g42770D,BnaC06g26620D,BnaC04g50450D,BnaC06g01660D,BnaAnng26360D,BnaC04g04490D,BnaA07g24920D,BnaC08g03210D,BnaC08g03850D,BnaCnng…
GO:0046274	lignin catabolic process	biological_process	42	39262	0.00347135	0.00700234	1.20903	BnaCnng57030D,BnaCnng02950D,BnaA10g26680D,BnaAnng08030D,BnaC04g07220D,BnaC04g14580D,BnaC02g03260D,BnaA05g05410D,BnaA04g21810D,BnaC08g17780D,BnaA04g27180D,BnaC09g49940D,BnaA10g25010D,BnaA03g09140D,BnaA03g00500D,BnaC04g45660D,BnaA05g12170D,BnaA02g06580D,BnaC09g47160D,BnaA04g17380D,BnaC02g02320D,BnaC03g00480D,BnaC04g54790D,BnaCnng24340D,BnaC09g48310D,BnaC04g50890D,BnaC02g03650D,BnaC04g41010D,BnaA08g…
GO:0016226	iron-sulfur cluster assembly	biological_process	41	39262	0.00433234	0.00863317	1.20535	BnaC03g64860D,BnaC01g13740D,BnaA03g26440D,BnaC03g46520D,BnaA03g23310D,BnaC04g43590D,BnaA04g19200D,BnaCnng28060D,BnaA05g18130D,BnaC03g30250D,BnaCnng10620D,BnaA09g01420D,BnaC06g04520D,BnaA09g08830D,BnaC02g02840D,BnaC03g31260D,BnaA01g15100D,BnaAnng28080D,BnaC09g26360D,BnaC01g17830D,BnaC05g28550D,BnaA03g25740D,BnaC08g14310D,BnaC09g22630D,BnaA08g25720D,BnaA05g19960D,BnaA03g39220D,BnaC09g09090D,BnaA01g…
GO:0009987	cellular process	biological_process	40	39262	0.082156	0.126347	1.10539	BnaA01g07350D,BnaC02g26390D,BnaC07g32530D,BnaA03g41480D,BnaA02g17790D,BnaA05g04640D,BnaA09g46410D,BnaA01g01070D,BnaA08g24360D,BnaC01g01810D,BnaC07g22880D,BnaC03g24720D,BnaA06g33420D,BnaC05g46420D,BnaC04g04100D,BnaC08g15780D,BnaA03g20690D,BnaC03g29110D,BnaA09g38240D,BnaA09g32360D,BnaA04g01450D,BnaC01g09020D,BnaC06g17640D,BnaAnng21080D,BnaC01g23260D,BnaA07g18610D,BnaC08g30210D,BnaA08g15530D,BnaCnng…
GO:0006006	glucose metabolic process	biological_process	39	39262	0	0	1.38174	BnaA03g28480D,BnaC08g40850D,BnaA08g24270D,BnaC07g11270D,BnaA08g04610D,BnaA06g07790D,BnaC08g40330D,BnaC03g05780D,BnaC02g25850D,BnaCnng48180D,BnaC05g47450D,BnaA08g30000D,BnaA07g08970D,BnaC06g19790D,BnaC09g43980D,BnaC03g33610D,BnaA07g15160D,BnaA08g26430D,BnaC05g09880D,BnaC07g24170D,BnaC05g09210D,BnaA09g01980D,BnaC06g13190D,BnaA08g31100D,BnaCnng06870D,BnaA03g04190D,BnaC09g01420D,BnaA06g10900D,BnaCnng…
GO:0019752	carboxylic acid metabolic process	biological_process	39	39262	0.986454	1	0.816485	BnaA07g25530D,BnaC01g09790D,BnaAnng06510D,BnaC03g58220D,BnaCnng07050D,BnaAnng23360D,BnaA09g44550D,BnaA06g19240D,BnaA08g04700D,BnaC06g27330D,BnaA02g26140D,BnaC07g00580D,BnaA09g15450D,BnaC05g51500D,BnaA03g39680D,BnaC03g54190D,BnaA07g00240D,BnaC01g24090D,BnaC04g12030D,BnaC02g34260D,BnaC09g40620D,BnaC08g05570D,BnaA03g06510D,BnaC05g14180D,BnaA08g18660D,BnaCnng21190D,BnaAnng27540D,BnaA07g00220D,BnaA06g…
GO:0006631	fatty acid metabolic process	biological_process	38	39262	3.91e-05	9.33e-05	1.31266	BnaC03g49190D,BnaA01g32860D,BnaC05g04350D,BnaC03g24420D,BnaA03g29710D,BnaC09g06780D,BnaC04g03030D,BnaA05g24320D,BnaA05g30610D,BnaC05g48250D,BnaC09g41590D,BnaC08g13270D,BnaA05g33500D,BnaA03g28050D,BnaA10g28090D,BnaCnng62430D,BnaA01g32550D,BnaA10g18080D,BnaA10g28060D,BnaC05g45070D,BnaC05g38330D,BnaA03g20420D,BnaCnng35000D,BnaA09g07080D,BnaA01g07910D,BnaA04g11760D,BnaC01g09510D,BnaA10g18090D,BnaC05g…
GO:0015914	phospholipid transport	biological_process	38	39262	0.000984723	0.00213855	1.25015	BnaC01g28380D,BnaA06g07520D,BnaC03g48240D,BnaA09g46440D,BnaC08g40500D,BnaC04g18740D,BnaC07g17730D,BnaA06g31810D,BnaA02g27550D,BnaA09g48190D,BnaCnng48470D,BnaC06g30340D,BnaA06g36230D,BnaA03g01540D,BnaA02g16070D,BnaC06g33850D,BnaC07g24800D,BnaC06g25680D,BnaA07g37090D,BnaC08g37730D,BnaA06g33510D,BnaAnng32350D,BnaC07g11980D,BnaCnng76100D,BnaA07g30400D,BnaC03g01830D,BnaA07g27360D,BnaC06g10670D,BnaC05g…
GO:0006265	DNA topological change	biological_process	38	39262	0.109502	0.163211	1.09388	BnaA04g01750D,BnaA01g07960D,BnaA05g28510D,BnaA04g18800D,BnaA05g20130D,BnaC09g31620D,BnaC03g01590D,BnaCnng10360D,BnaC08g39590D,BnaC03g70890D,BnaC05g42830D,BnaA10g26080D,BnaA03g14820D,BnaC02g13170D,BnaC03g17870D,BnaA01g05990D,BnaA03g31350D,BnaC03g36740D,BnaC04g43010D,BnaAnng17740D,BnaC02g42810D,BnaC05g31500D,BnaC01g14640D,BnaA10g26920D,BnaC03g01570D,BnaC01g09540D,BnaA03g55060D,BnaC03g17880D,BnaA10g…
GO:0006310	DNA recombination	biological_process	37	39262	0.000312627	0.00070502	1.27811	BnaA05g13130D,BnaCnng50230D,BnaA07g15840D,BnaA08g25530D,BnaC05g52240D,BnaA07g08730D,BnaC07g28180D,BnaA10g11190D,BnaC06g27700D,BnaA06g34940D,BnaA04g05140D,BnaC08g09090D,BnaA06g04600D,BnaA08g31040D,BnaCnng53340D,BnaA09g14010D,BnaA07g25980D,BnaA09g47850D,BnaCnng41270D,BnaC07g20790D,BnaA01g24140D,BnaC08g41380D,BnaC08g43360D,BnaA09g47280D,BnaC03g00130D,BnaC08g14630D,BnaC09g14340D,BnaC07g11800D,BnaA08g…
GO:0006465	signal peptide processing	biological_process	37	39262	0.00398406	0.00800709	1.21725	BnaC04g05410D,BnaA02g31150D,BnaA01g28550D,BnaA03g56570D,BnaAnng32770D,BnaC02g43720D,BnaC03g34180D,BnaC01g35840D,BnaA04g22730D,BnaC09g03160D,BnaC01g00920D,BnaC06g09860D,BnaA05g23810D,BnaC05g27940D,BnaA05g31930D,BnaC04g46750D,BnaC06g34820D,BnaA07g31140D,BnaC03g22370D,BnaCnng66690D,BnaA01g00010D,BnaA06g01890D,BnaC02g39710D,BnaC05g46540D,BnaC05g37620D,BnaC03g69200D,BnaA09g42640D,BnaA06g28750D,BnaC04g…
GO:0032259	methylation	biological_process	37	39262	0.010285	0.0195927	1.18894	BnaC02g02250D,BnaCnng01050D,BnaA06g23300D,BnaA06g13610D,BnaCnng00420D,BnaC07g41550D,BnaC07g23560D,BnaA05g25850D,BnaCnng09150D,BnaC05g39940D,BnaC03g44550D,BnaC08g29200D,BnaC03g50020D,BnaC01g09620D,BnaAnng01390D,BnaA10g27580D,BnaA06g13450D,BnaC09g24750D,BnaC09g43310D,BnaA01g08050D,BnaA06g00010D,BnaA10g19720D,BnaA03g47600D,BnaA09g22720D,BnaA07g04810D,BnaCnng03890D,BnaA03g59050D,BnaA09g37410D,BnaCnng…
GO:0016310	phosphorylation	biological_process	37	39262	0.187625	0.263877	1.06509	BnaC04g51810D,BnaA10g21570D,BnaC07g21260D,BnaA06g34500D,BnaA07g25770D,BnaA07g08880D,BnaCnng27780D,BnaC03g04510D,BnaAnng25950D,BnaC03g34760D,BnaC02g48400D,BnaC07g06920D,BnaA07g03050D,BnaAnng24980D,BnaA01g35130D,BnaA02g31620D,BnaCnng17850D,BnaC03g44990D,BnaC08g14540D,BnaC09g03660D,BnaA03g37960D,BnaC08g49610D,BnaC07g33060D,BnaC09g45760D,BnaA05g00430D,BnaCnng61520D,BnaA09g04240D,BnaA08g25580D,BnaC07g…
GO:0006506	GPI anchor biosynthetic process	biological_process	36	39262	0.00163626	0.00346651	1.24357	BnaA08g25070D,BnaC02g09340D,BnaA05g33900D,BnaC08g41770D,BnaC02g05790D,BnaC08g28100D,BnaA08g23670D,BnaC03g25290D,BnaA06g35890D,BnaC08g16860D,BnaCnng09180D,BnaA08g23440D,BnaC04g10330D,BnaA06g10750D,BnaA05g08920D,BnaA09g56460D,BnaA10g27110D,BnaC05g48780D,BnaC08g15140D,BnaC05g12910D,BnaA02g02330D,BnaC05g00060D,BnaC07g19550D,BnaA03g56790D,BnaA09g36520D,BnaA10g00040D,BnaCnng54040D,BnaC08g38540D,BnaA02g…
GO:0006098	pentose-phosphate shunt	biological_process	36	39262	0.0126918	0.0236033	1.18435	BnaC05g13730D,BnaA03g04310D,BnaA06g39320D,BnaA09g46150D,BnaC03g07200D,BnaAnng18330D,BnaA08g02750D,BnaA02g35580D,BnaA08g09990D,BnaCnng11100D,BnaC07g49670D,BnaC06g01480D,BnaC08g03060D,BnaC05g14020D,BnaC02g04730D,BnaC05g48310D,BnaC03g64520D,BnaC07g30010D,BnaA10g19920D,BnaA01g20810D,BnaA02g01610D,BnaC09g11930D,BnaA09g11470D,BnaA06g04150D,BnaA09g04900D,BnaA01g33010D,BnaA06g12420D,BnaC03g05850D,BnaA05g…
GO:0003333	amino acid transmembrane transport	biological_process	36	39262	0.0527322	0.0854948	1.13052	BnaA03g42910D,BnaA06g34530D,BnaA01g26050D,BnaC05g39680D,BnaA09g12110D,BnaC02g33700D,BnaA09g45150D,BnaA10g24900D,BnaCnng65210D,BnaA03g42920D,BnaCnng50730D,BnaA05g25770D,BnaA09g53040D,BnaA06g35110D,BnaC09g49830D,BnaA05g32770D,BnaA03g58530D,BnaCnng25140D,BnaC03g01740D,BnaAnng23630D,BnaC07g34120D,BnaA09g24850D,BnaA04g20450D,BnaC08g37970D,BnaC09g12080D,BnaA02g27130D,BnaAnng19530D,BnaC05g48070D,BnaC01g…
GO:0006071	glycerol metabolic process	biological_process	36	39262	0.974368	1	0.829046	BnaA04g10820D,BnaA02g36750D,BnaA01g15810D,BnaA02g12730D,BnaC06g13430D,BnaCnng75290D,BnaA07g22350D,BnaC09g33580D,BnaC08g03580D,BnaAnng41260D,BnaC06g35160D,BnaC02g11010D,BnaC03g41620D,BnaC09g31980D,BnaC07g40640D,BnaC06g23230D,BnaCnng05510D,BnaA07g22360D,BnaC06g23200D,BnaA10g09570D,BnaC09g52640D,BnaA07g29250D,BnaA07g31350D,BnaC04g33210D,BnaC03g21170D,BnaA08g03250D,BnaA05g22480D,BnaA03g48410D,BnaA03g…
GO:0071577	zinc II ion transmembrane transport	biological_process	35	39262	0.00210399	0.00440631	1.24003	BnaC01g12040D,BnaC05g40440D,BnaA04g18660D,BnaC07g36030D,BnaA05g10760D,BnaC01g05220D,BnaCnng46020D,BnaC04g12510D,BnaA09g13960D,BnaA05g26420D,BnaA08g07950D,BnaA03g44150D,BnaC05g49110D,BnaA09g47880D,BnaCnng21180D,BnaA08g08320D,BnaC07g36010D,BnaA05g12290D,BnaA03g44160D,BnaC01g28910D,BnaA01g35020D,BnaCnng67060D,BnaA09g25300D,BnaA01g23170D,BnaA10g03460D,BnaCnng65140D,BnaC08g09190D,BnaC04g14740D,BnaC07g…
GO:0022900	electron transport chain	biological_process	35	39262	0.0332024	0.056273	1.15145	BnaC04g16810D,BnaC03g48410D,BnaA09g52600D,BnaA04g15880D,BnaCnng27340D,BnaA08g25500D,BnaC08g07480D,BnaC04g39140D,BnaA06g25230D,BnaA07g13260D,BnaA07g37420D,BnaC05g08430D,BnaC01g28900D,BnaCnng11890D,BnaC01g22700D,BnaA01g23160D,BnaCnng12780D,BnaA09g07280D,BnaA01g18870D,BnaAnng04290D,BnaA03g22350D,BnaC09g07160D,BnaA09g13970D,BnaC09g07770D,BnaC07g16540D,BnaA03g30700D,BnaA08g30050D,BnaC03g47090D,BnaA09g…
GO:0000226	microtubule cytoskeleton organization	biological_process	35	39262	0.75004	0.83825	0.930019	BnaC05g21560D,BnaC09g31680D,BnaA10g09470D,BnaA03g11490D,BnaC01g18970D,BnaA09g27700D,BnaCnng60160D,BnaA01g15880D,BnaAnng01810D,BnaA04g15970D,BnaC02g11680D,BnaC04g55380D,BnaA08g14310D,BnaC03g08450D,BnaC02g23240D,BnaA10g24280D,BnaC03g57230D,BnaC02g22120D,BnaC02g13200D,BnaA06g34430D,BnaC08g12300D,BnaC08g24770D,BnaA10g17310D,BnaA09g45540D,BnaA06g17130D,BnaA03g06600D,BnaA02g09170D,BnaA09g33980D,BnaC06g…
GO:0043039	tRNA aminoacylation	biological_process	34	39262	0.0191773	0.0342317	1.17448	BnaA05g15950D,BnaC09g03560D,BnaC03g50160D,BnaA06g28360D,BnaC05g20730D,BnaC04g33290D,BnaA02g05940D,BnaA07g17620D,BnaC09g03450D,BnaA08g02200D,BnaA09g37290D,BnaA03g37870D,BnaA09g42950D,BnaC02g40340D,BnaUnng00940D,BnaA05g23270D,BnaC08g29030D,BnaA09g28460D,BnaC06g16310D,BnaC06g03380D,BnaA02g31710D,BnaC07g28480D,BnaA04g12390D,BnaC08g49240D,BnaA06g23200D,BnaC03g44930D,BnaA01g15800D,BnaA08g19400D,BnaA09g…
GO:0009396	folic acid-containing compound biosynthetic process	biological_process	34	39262	0.264712	0.355255	1.04398	BnaC04g45850D,BnaC03g37500D,BnaC01g08380D,BnaA09g51830D,BnaAnng01550D,BnaA04g22120D,BnaC09g44050D,BnaC02g02140D,BnaC02g04470D,BnaC03g02330D,BnaC06g03660D,BnaC09g49420D,BnaC05g51210D,BnaA10g24530D,BnaC05g40770D,BnaC01g38830D,BnaA03g32210D,BnaA03g01800D,BnaC06g21660D,BnaA03g37930D,BnaA01g06970D,BnaCnng02210D,BnaA05g26750D,BnaA07g14330D,BnaA02g01390D,BnaA01g31960D,BnaC05g51220D,BnaC07g19030D,BnaC02g…
GO:0008272	sulfate transport	biological_process	34	39262	0.835023	0.917632	0.903447	BnaC09g00110D,BnaC01g35550D,BnaC05g37350D,BnaC01g44250D,BnaA07g35730D,BnaA05g23640D,BnaC09g43540D,BnaC07g13290D,BnaC02g08870D,BnaC02g14670D,BnaC06g38470D,BnaA09g32410D,BnaC05g18450D,BnaA03g04410D,BnaA02g18690D,BnaC07g32580D,BnaA07g10140D,BnaA07g33850D,BnaC06g40650D,BnaA10g19810D,BnaC02g24710D,BnaA02g00410D,BnaA09g30120D,BnaC03g09670D,BnaC06g38480D,BnaC03g39450D,BnaC03g05940D,BnaA02g04350D,BnaA01g…
GO:0006904	vesicle docking involved in exocytosis	biological_process	33	39262	0.0478379	0.0780989	1.13994	BnaC05g09460D,BnaCnng19240D,BnaC08g41300D,BnaA03g31170D,BnaC06g20810D,BnaA05g03110D,BnaC09g23480D,BnaA09g47180D,BnaA06g08210D,BnaC03g36500D,BnaA02g18530D,BnaC06g20880D,BnaAnng20790D,BnaC08g25650D,BnaA06g25440D,BnaCnng42210D,BnaA09g47190D,BnaC05g42720D,BnaA05g28440D,BnaA09g34690D,BnaA01g31810D,BnaC06g21140D,BnaA09g21110D,BnaC08g27550D,BnaCnng68440D,BnaC06g20830D,BnaC04g52550D,BnaC01g38640D,BnaCnng…
GO:0006200	obsolete ATP catabolic process	biological_process	33	39262	0.140802	0.205758	1.08566	BnaC07g02580D,BnaA03g02620D,BnaC08g33960D,BnaA06g26550D,BnaC08g30540D,BnaC03g68040D,BnaA10g22780D,BnaC02g11560D,BnaAnng10900D,BnaC07g30410D,BnaA09g09830D,BnaC07g42390D,BnaA03g02630D,BnaA10g11420D,BnaA09g41340D,BnaAnng06000D,BnaA08g13170D,BnaAnng10910D,BnaA01g06820D,BnaAnng05990D,BnaA09g38390D,BnaC03g03720D,BnaA02g33520D,BnaA02g08160D,BnaCnng44750D,BnaC09g47340D,BnaCnng30540D,BnaAnng23670D,BnaC09g…
GO:0006813	potassium ion transport	biological_process	33	39262	0.575961	0.675273	0.97016	BnaA04g14030D,BnaA03g50250D,BnaA03g28160D,BnaC04g16000D,BnaC08g33320D,BnaC04g36270D,BnaA09g17910D,BnaC05g00300D,BnaC05g00280D,BnaC07g43880D,BnaC04g37620D,BnaA09g41300D,BnaCnng47090D,BnaC07g42730D,BnaA04g14530D,BnaA06g36090D,BnaCnng40090D,BnaC04g36890D,BnaA01g04350D,BnaA07g13760D,BnaC08g33890D,BnaA04g14740D,BnaCnng08900D,BnaA09g20220D,BnaC07g04630D,BnaA09g41750D,BnaC03g33190D,BnaC01g05810D,BnaA10g…
GO:0046488	phosphatidylinositol metabolic process	biological_process	33	39262	0.804166	0.887282	0.91195	BnaA08g21050D,BnaC08g20070D,BnaC02g20500D,BnaC03g35590D,BnaA02g15290D,BnaC01g39540D,BnaCnng01950D,BnaC08g42290D,BnaA09g40500D,BnaA10g04100D,BnaA07g29040D,BnaC01g37100D,BnaCnng58420D,BnaC09g14450D,BnaC06g32150D,BnaA03g33330D,BnaC01g04950D,BnaA09g23120D,BnaC05g08390D,BnaC05g43070D,BnaA03g30270D,BnaA09g00140D,BnaA01g03610D,BnaA06g06710D,BnaA02g36050D,BnaC02g24660D,BnaC01g05410D,BnaA09g47830D,BnaA05g…
GO:0009089	lysine biosynthetic process via diaminopimelate	biological_process	32	39262	0.0123815	0.0230523	1.19502	BnaC04g07890D,BnaA03g20590D,BnaC06g14840D,BnaC09g44740D,BnaA09g33840D,BnaA04g01030D,BnaA04g25510D,BnaA08g11470D,BnaA05g07080D,BnaC03g05110D,BnaC03g24630D,BnaC03g15660D,BnaC08g16430D,BnaA03g38440D,BnaA01g03290D,BnaC04g50190D,BnaA07g37630D,BnaA04g26190D,BnaA05g04860D,BnaC03g45280D,BnaA06g09610D,BnaC05g49480D,BnaC03g53370D,BnaC04g55250D,BnaA10g20730D,BnaA03g03620D,BnaC03g66430D,BnaC04g04200D,BnaA08g…
GO:0000105	histidine biosynthetic process	biological_process	32	39262	0.0286557	0.0490728	1.16357	BnaC05g30140D,BnaC04g09090D,BnaA01g24700D,BnaA04g09240D,BnaA05g36290D,BnaC06g32920D,BnaA01g16010D,BnaC01g27670D,BnaC04g18340D,BnaA05g08060D,BnaC09g06150D,BnaA09g14970D,BnaC01g19110D,BnaC05g29230D,BnaA01g21560D,BnaC05g07230D,BnaA09g52390D,BnaC03g20010D,BnaC03g50430D,BnaA06g23030D,BnaC09g15600D,BnaC02g20870D,BnaA03g59340D,BnaA02g15650D,BnaC04g31470D,BnaA03g16590D,BnaC01g31520D,BnaC05g24080D,BnaA09g…
GO:0046034	ATP metabolic process	biological_process	31	39262	0.00160492	0.00341332	1.25982	BnaC07g15490D,BnaCnng12620D,BnaA03g02620D,BnaCnng26740D,BnaA10g22780D,BnaA06g14330D,BnaC05g37960D,BnaA07g11570D,BnaC09g27590D,BnaC01g27960D,BnaA03g02630D,BnaA07g38430D,BnaC06g36660D,BnaCnng12600D,BnaAnng06000D,BnaC09g47330D,BnaAnng05990D,BnaCnng20640D,BnaC02g01030D,BnaC03g03720D,BnaC06g39330D,BnaA08g21880D,BnaA07g32270D,BnaC09g47340D,BnaA01g34170D,BnaC06g20290D,BnaA10g22770D,BnaA07g34490D,BnaC02g…
GO:0006754	ATP biosynthetic process	biological_process	31	39262	0.184752	0.260938	1.07085	BnaC07g02580D,BnaA03g02620D,BnaC08g33960D,BnaC08g30540D,BnaC03g68040D,BnaA10g22780D,BnaC02g11560D,BnaAnng10900D,BnaA09g09830D,BnaC07g42390D,BnaA03g02630D,BnaA10g11420D,BnaA09g41340D,BnaAnng06000D,BnaA08g13170D,BnaAnng10910D,BnaA01g06820D,BnaAnng05990D,BnaA09g38390D,BnaC03g03720D,BnaA02g33520D,BnaA02g08160D,BnaCnng44750D,BnaC09g47340D,BnaCnng30540D,BnaAnng23670D,BnaC09g32850D,BnaC02g42250D,BnaC02g…
GO:0034968	histone lysine methylation	biological_process	31	39262	0.184752	0.260938	1.07085	BnaC03g06140D,BnaC03g01840D,BnaC04g43670D,BnaC06g43880D,BnaA05g32760D,BnaC09g50300D,BnaC06g43300D,BnaC07g17530D,BnaA03g04610D,BnaC02g02520D,BnaA04g13850D,BnaA07g22850D,BnaA04g13190D,BnaC09g50310D,BnaC05g48060D,BnaC08g24970D,BnaC05g47290D,BnaC02g30730D,BnaC04g10170D,BnaA09g34050D,BnaA04g19330D,BnaA02g22450D,BnaA07g30600D,BnaA10g25310D,BnaC04g56280D,BnaA06g36410D,BnaA03g01550D,BnaA05g33030D,BnaC04g…
GO:0007205	protein kinase C-activating G-protein coupled receptor signaling pathway	biological_process	31	39262	0.267036	0.356916	1.04473	BnaA06g22880D,BnaC01g08060D,BnaC03g03330D,BnaC04g04760D,BnaC07g30790D,BnaC03g16020D,BnaA05g05360D,BnaC09g51050D,BnaA09g10340D,BnaA04g26670D,BnaC04g50730D,BnaA03g13210D,BnaA03g02290D,BnaA03g44730D,BnaAnng06320D,BnaA01g06700D,BnaA06g26190D,BnaC02g01400D,BnaC07g03080D,BnaC08g36120D,BnaA02g32870D,BnaA09g43530D,BnaA08g09710D,BnaA09g09730D,BnaC03g64130D,BnaC03g50590D,BnaC09g10500D,BnaC07g36750D,BnaA07g…
GO:0007275	multicellular organismal development	biological_process	31	39262	0.997228	1	0.751474	BnaA02g35510D,BnaA04g28030D,BnaA04g02180D,BnaC03g38100D,BnaA07g19050D,BnaC07g41060D,BnaC04g30530D,BnaC04g21600D,BnaA07g28200D,BnaA07g25910D,BnaA07g14180D,BnaCnng31730D,BnaC08g12640D,BnaC03g19360D,BnaA03g19700D,BnaA04g27970D,BnaC06g12240D,BnaA03g56440D,BnaC01g20500D,BnaA01g16720D,BnaA09g37240D,BnaC06g18190D,BnaA07g37960D,BnaA08g13990D,BnaC03g23590D,BnaC04g48050D,BnaCnng56980D,BnaA04g00540D,BnaC08g…
GO:0006012	galactose metabolic process	biological_process	30	39262	0.00209773	0.00440631	1.25613	BnaA01g10650D,BnaC07g18040D,BnaA10g16640D,BnaC07g18010D,BnaC09g26030D,BnaC09g12180D,BnaA05g09030D,BnaC01g15760D,BnaA09g25900D,BnaAnng39400D,BnaC05g23640D,BnaA01g32760D,BnaC09g18390D,BnaA09g17150D,BnaC05g45250D,BnaA09g22180D,BnaA06g38100D,BnaCnng60720D,BnaC01g12180D,BnaA05g30800D,BnaA08g24600D,BnaCnng22570D,BnaA03g29500D,BnaAnng10090D,BnaC09g39650D,BnaA09g12250D,BnaA01g13540D,BnaC07g38610D,BnaC08g…
GO:0006820	anion transport	biological_process	30	39262	0.0422997	0.070031	1.15145	BnaC03g12920D,BnaC03g32540D,BnaC03g72490D,BnaA03g27530D,BnaA03g21650D,BnaA10g29750D,BnaA05g00740D,BnaA02g02470D,BnaC09g32780D,BnaCnng52100D,BnaCnng42590D,BnaC03g34730D,BnaC04g51480D,BnaAnng31830D,BnaA02g35930D,BnaA01g04520D,BnaA10g11490D,BnaC04g00350D,BnaCnng35410D,BnaA03g29440D,BnaA05g37480D,BnaC04g21390D,BnaCnng35390D,BnaA03g10240D,BnaC01g06010D,BnaCnng08280D,BnaA06g10160D,BnaA04g26910D,BnaC05g…
GO:0070588	calcium ion transmembrane transport	biological_process	30	39262	0.0806804	0.124193	1.12033	BnaC03g41960D,BnaA10g11120D,BnaA03g49860D,BnaA01g24360D,BnaC08g28250D,BnaC04g20690D,BnaA03g54160D,BnaC03g58140D,BnaC03g61330D,BnaC07g42210D,BnaA09g36660D,BnaA01g25310D,BnaA03g36090D,BnaC07g46660D,BnaC03g15290D,BnaC01g31340D,BnaA01g07100D,BnaC02g11860D,BnaC04g47760D,BnaCnng07470D,BnaA07g17260D,BnaC01g17980D,BnaC01g32200D,BnaA02g08330D,BnaA08g15730D,BnaA04g24000D,BnaC09g53480D,BnaA08g18750D,BnaC01g…
GO:0009073	aromatic amino acid family biosynthetic process	biological_process	29	39262	0	0	1.38174	BnaC01g00830D,BnaC01g04680D,BnaC08g03290D,BnaC06g43480D,BnaA09g02570D,BnaC09g08240D,BnaC06g30540D,BnaA09g30660D,BnaA07g24300D,BnaC07g25660D,BnaCnng59540D,BnaA02g00750D,BnaC07g25310D,BnaA06g30990D,BnaCnng69960D,BnaA08g20870D,BnaA01g03400D,BnaA05g36390D,BnaA09g08060D,BnaC02g00030D,BnaC05g17710D,BnaC05g25830D,BnaC06g38770D,BnaA07g27910D,BnaA07g34140D,BnaC09g02030D,BnaA01g34720D,BnaA06g31310D,BnaA08g…
GO:0000272	polysaccharide catabolic process	biological_process	29	39262	0.00913517	0.0175652	1.21426	BnaA08g00480D,BnaC03g14120D,BnaA03g07240D,BnaA01g17940D,BnaC03g43570D,BnaC03g78310D,BnaC09g21440D,BnaC09g39140D,BnaCnng71190D,BnaA03g11260D,BnaA03g37260D,BnaC03g71580D,BnaC07g34180D,BnaC02g12830D,BnaCnng71250D,BnaA02g08900D,BnaC03g78320D,BnaC01g21190D,BnaC04g04570D,BnaA07g05790D,BnaA08g05660D,BnaA02g36650D,BnaA05g05170D,BnaCnng02280D,BnaC03g09200D,BnaA10g16290D,BnaC02g31510D,BnaA09g51890D,BnaA03g…
GO:0006801	superoxide metabolic process	biological_process	29	39262	0.0237232	0.0414023	1.17855	BnaA09g47090D,BnaA05g28020D,BnaC09g04910D,BnaA08g24700D,BnaCnng33420D,BnaA09g10710D,BnaC09g10980D,BnaC04g39580D,BnaC07g39340D,BnaA06g05150D,BnaA04g16310D,BnaA06g26040D,BnaA05g28000D,BnaA03g47140D,BnaA01g31350D,BnaC05g06430D,BnaA01g14450D,BnaC01g17020D,BnaCnng69530D,BnaC08g41150D,BnaC02g42190D,BnaC03g16120D,BnaC05g42240D,BnaC08g42970D,BnaA03g13310D,BnaA09g05370D,BnaA09g48720D,BnaC09g39740D,BnaA10g…
GO:0048268	clathrin coat assembly	biological_process	29	39262	0.951197	1	0.834803	BnaC08g00120D,BnaC07g10870D,BnaC01g06220D,BnaA02g08290D,BnaA10g11240D,BnaC05g03060D,BnaC02g34010D,BnaA02g25770D,BnaA09g23660D,BnaC05g11150D,BnaC04g37710D,BnaA06g09690D,BnaC09g53320D,BnaC05g50410D,BnaC05g10880D,BnaC07g20930D,BnaAnng36220D,BnaA09g18730D,BnaA04g14860D,BnaC08g33460D,BnaA01g04700D,BnaA01g15110D,BnaAnng12440D,BnaA06g34790D,BnaC01g17840D,BnaC08g08040D,BnaA09g40960D,BnaA07g37210D,BnaC09g…
GO:0006367	transcription initiation from RNA polymerase II promoter	biological_process	29	39262	0.968362	1	0.817766	BnaA10g01780D,BnaC07g38900D,BnaA07g21660D,BnaC02g28890D,BnaC03g29680D,BnaC08g11660D,BnaCnng55660D,BnaA09g49410D,BnaA08g28950D,BnaC05g01860D,BnaC05g05210D,BnaA08g14710D,BnaA02g17270D,BnaA08g30470D,BnaC08g45360D,BnaAnng35590D,BnaA01g35130D,BnaA01g10490D,BnaC08g02230D,BnaA03g46710D,BnaA03g25250D,BnaA06g00420D,BnaC02g24370D,BnaC01g41540D,BnaA05g13850D,BnaCnng67730D,BnaAnng16720D,BnaC06g07180D,BnaA02g…
GO:0006750	glutathione biosynthetic process	biological_process	28	39262	0	0	1.38174	BnaC03g65140D,BnaC04g02920D,BnaA05g11390D,BnaA06g28850D,BnaC07g37900D,BnaA09g50050D,BnaC01g41470D,BnaA03g58670D,BnaA03g45730D,BnaCnng46950D,BnaA05g03320D,BnaC04g48930D,BnaC05g26620D,BnaC03g24200D,BnaC03g17440D,BnaA01g12900D,BnaC07g37950D,BnaA04g25070D,BnaC05g26630D,BnaA03g20230D,BnaCnng30690D,BnaA09g03700D,BnaA10g10920D,BnaA03g14380D,BnaC08g44630D,BnaC09g03120D,BnaA05g28080D,BnaC07g27830D
GO:0046939	nucleotide phosphorylation	biological_process	28	39262	0	0	1.38174	BnaA05g06070D,BnaA06g22680D,BnaC04g06280D,BnaC03g50940D,BnaA09g38260D,BnaA06g30580D,BnaA03g17110D,BnaC07g48060D,BnaC08g47170D,BnaAnng32580D,BnaA04g29220D,BnaA03g23470D,BnaA08g07200D,BnaA04g21280D,BnaC02g48410D,BnaA09g04210D,BnaA02g31630D,BnaC07g26210D,BnaC03g27800D,BnaA09g02790D,BnaCnng15820D,BnaA01g14660D,BnaC01g17230D,BnaC07g28830D,BnaC09g03640D,BnaA06g39400D,BnaC03g20630D,BnaA09g06550D
GO:0006546	glycine catabolic process	biological_process	28	39262	0.000761018	0.00167261	1.28963	BnaA07g21510D,BnaA09g24310D,BnaAnng15720D,BnaC05g24600D,BnaA03g16100D,BnaC06g36620D,BnaC05g28570D,BnaA01g03860D,BnaAnng18080D,BnaA08g25100D,BnaA09g21100D,BnaA06g07360D,BnaC06g22020D,BnaC01g05230D,BnaC03g19300D,BnaC08g15110D,BnaC01g43290D,BnaC08g41790D,BnaA07g32240D,BnaC03g10880D,BnaC04g10230D,BnaA09g47510D,BnaA05g08820D,BnaA01g36150D,BnaA05g18150D,BnaAnng37640D,BnaC09g23440D,BnaC08g07440D
GO:0006075	(1->3)-beta-D-glucan biosynthetic process	biological_process	28	39262	0.0115787	0.0216805	1.20903	BnaC05g44800D,BnaC09g00800D,BnaA09g49880D,BnaC09g44080D,BnaC05g04470D,BnaA10g03730D,BnaC09g22390D,BnaA05g30410D,BnaA07g18170D,BnaC06g17090D,BnaC04g12720D,BnaC05g03680D,BnaC05g39020D,BnaA01g32440D,BnaC04g08410D,BnaA05g11020D,BnaA09g20050D,BnaC02g04450D,BnaA09g01630D,BnaA02g01360D,BnaA10g04230D,BnaC05g04460D,BnaA10g20270D,BnaC09g22380D,BnaA05g07560D,BnaC08g44800D,BnaA09g20060D,BnaUnng02530D
GO:0007067	mitotic nuclear division	biological_process	28	39262	0.0292947	0.0500629	1.17239	BnaA04g08060D,BnaC04g24560D,BnaA03g18110D,BnaC03g03450D,BnaC03g18350D,BnaC04g29610D,BnaC05g02060D,BnaA10g23070D,BnaC04g11800D,BnaC04g34530D,BnaC09g47620D,BnaA04g03020D,BnaA04g07360D,BnaA09g50840D,BnaA09g36400D,BnaA02g02650D,BnaC08g45490D,BnaA03g15230D,BnaC02g06090D,BnaC08g27990D,BnaC03g21630D,BnaC04g11810D,BnaA10g02140D,BnaA05g35040D,BnaUnng00060D,BnaC03g44770D,BnaA03g37570D,BnaCnng37720D
GO:0042026	protein refolding	biological_process	28	39262	0.182138	0.25769	1.07469	BnaA04g16190D,BnaA03g10770D,BnaA08g00450D,BnaC09g33020D,BnaA05g13740D,BnaA03g15330D,BnaC03g13440D,BnaA03g32840D,BnaCnng76000D,BnaC04g11280D,BnaC02g08340D,BnaC03g70570D,BnaA03g33070D,BnaAnng28680D,BnaA05g10360D,BnaC03g47010D,BnaC05g39890D,BnaA03g22260D,BnaC07g48200D,BnaA03g37240D,BnaA07g13530D,BnaAnng08540D,BnaC04g16310D,BnaC03g37960D,BnaC06g10960D,BnaC03g38160D,BnaC03g43530D,BnaC04g39420D
GO:0009308	amine metabolic process	biological_process	28	39262	0.471563	0.569068	0.992021	BnaC04g05360D,BnaA03g19840D,BnaC03g72290D,BnaC03g69740D,BnaA06g21880D,BnaC03g23740D,BnaA08g04210D,BnaA03g54620D,BnaA08g07750D,BnaAnng24490D,BnaA03g18810D,BnaC08g47490D,BnaC01g22650D,BnaCnng45980D,BnaAnng10300D,BnaC08g04880D,BnaA06g20480D,BnaC04g48360D,BnaC04g20180D,BnaA09g10720D,BnaC02g28390D,BnaA08g07730D,BnaC03g75090D,BnaA06g20490D,BnaA02g21420D,BnaA04g24530D,BnaC04g54940D,BnaA03g54760D
GO:0006796	phosphate-containing compound metabolic process	biological_process	27	39262	0.00101948	0.00220239	1.28645	BnaA09g33870D,BnaAnng37560D,BnaC02g27940D,BnaA08g14280D,BnaC08g49780D,BnaA10g22430D,BnaA09g51600D,BnaC09g46990D,BnaA02g00090D,BnaA04g26810D,BnaA10g00790D,BnaC04g51570D,BnaCnng43100D,BnaCnng01560D,BnaA02g20410D,BnaC04g00590D,BnaA09g51480D,BnaA07g01950D,BnaA03g55930D,BnaA04g04610D,BnaA09g09560D,BnaC07g03580D,BnaA05g01040D,BnaC08g24660D,BnaC03g03880D,BnaC05g00850D,BnaC04g27080D
GO:0009966	regulation of signal transduction	biological_process	27	39262	0.00101948	0.00220239	1.28645	BnaA06g08930D,BnaC08g39990D,BnaC08g30020D,BnaA06g38990D,BnaA03g12720D,BnaC03g54000D,BnaC03g74930D,BnaA10g07550D,BnaA01g09740D,BnaC02g14780D,BnaA06g19730D,BnaC01g11450D,BnaC09g28300D,BnaA08g08960D,BnaC06g17580D,BnaA07g18550D,BnaC03g15600D,BnaA04g01820D,BnaC04g23370D,BnaA10g06390D,BnaC09g29060D,BnaC08g29500D,BnaC05g10250D,BnaA03g14720D,BnaC03g17770D,BnaA09g45920D,BnaA09g38050D
GO:0006821	chloride transport	biological_process	26	39262	0	0	1.38174	BnaA06g32380D,BnaC03g51770D,BnaA07g15180D,BnaA06g21760D,BnaA04g11860D,BnaC06g07440D,BnaA02g28670D,BnaC04g33870D,BnaA02g33340D,BnaC02g36720D,BnaC01g03130D,BnaC03g27500D,BnaC02g16210D,BnaC07g49590D,BnaA08g00400D,BnaA06g28170D,BnaA03g23270D,BnaCnng53550D,BnaA06g00250D,BnaC06g13300D,BnaA02g11800D,BnaC08g08120D,BnaC07g24030D,BnaA01g01990D,BnaA08g07280D,BnaC03g70680D
GO:0006298	mismatch repair	biological_process	26	39262	0.0442417	0.0730255	1.15888	BnaCnng46130D,BnaC06g05430D,BnaC03g31100D,BnaA05g20450D,BnaC02g16350D,BnaC07g39740D,BnaA08g08260D,BnaC01g30070D,BnaA02g11900D,BnaA03g26360D,BnaC03g28480D,BnaC07g08470D,BnaC02g13830D,BnaA02g09880D,BnaC02g27290D,BnaC06g05440D,BnaA01g22970D,BnaCnng35120D,BnaC07g45660D,BnaA02g20560D,BnaA07g05700D,BnaCnng68560D,BnaCnng23780D,BnaA03g23940D,BnaA03g53380D,BnaA03g34810D
GO:0033014	tetrapyrrole biosynthetic process	biological_process	26	39262	0.0442417	0.0730255	1.15888	BnaC01g28060D,BnaA09g40440D,BnaA09g06670D,BnaCnng09550D,BnaA03g02420D,BnaA01g35850D,BnaCnng70590D,BnaC02g38590D,BnaC01g25600D,BnaC08g32880D,BnaA09g14820D,BnaC03g74650D,BnaC06g27910D,BnaA09g57180D,BnaA06g22720D,BnaAnng06210D,BnaA01g20360D,BnaA10g23080D,BnaA07g28250D,BnaC09g47630D,BnaC02g01240D,BnaC08g42480D,BnaC03g03440D,BnaA06g07920D,BnaC09g05970D,BnaC09g15440D
GO:0009408	response to heat	biological_process	25	39262	0	0	1.38174	BnaA04g12800D,BnaC04g34720D,BnaCnng47600D,BnaA03g08370D,BnaA07g35850D,BnaC09g42450D,BnaA08g18500D,BnaC03g58400D,BnaA09g55830D,BnaA06g30470D,BnaC02g38330D,BnaC03g10640D,BnaA02g05430D,BnaA05g22410D,BnaC07g49210D,BnaC08g33540D,BnaA10g14240D,BnaC01g00820D,BnaAnng08020D,BnaC02g06060D,BnaC05g35680D,BnaCnng33760D,BnaA01g34580D,BnaA10g14250D,BnaA10g18730D
GO:0042176	regulation of protein catabolic process	biological_process	25	39262	0.00022279	0.000509412	1.3286	BnaA01g08440D,BnaA07g32250D,BnaA07g00430D,BnaA06g17980D,BnaA08g13700D,BnaCnng26770D,BnaC04g12080D,BnaCnng48550D,BnaA02g18360D,BnaC07g00290D,BnaC08g13070D,BnaC06g36630D,BnaA07g11600D,BnaCnng77420D,BnaCnng07150D,BnaC07g41330D,BnaC08g23210D,BnaC01g09980D,BnaA03g15060D,BnaC04g43310D,BnaC03g18080D,BnaAnng17060D,BnaA03g49280D,BnaA04g19020D,BnaA08g21890D
GO:0008295	spermidine biosynthetic process	biological_process	25	39262	0.485861	0.582608	0.986959	BnaA10g18360D,BnaC05g48280D,BnaC09g41900D,BnaAnng08590D,BnaC05g22370D,BnaA08g10990D,BnaA01g02450D,BnaC03g65810D,BnaA03g53010D,BnaC03g07500D,BnaC01g03710D,BnaA05g33510D,BnaA01g02460D,BnaA03g07430D,BnaAnng36830D,BnaC03g09400D,BnaC01g03720D,BnaC06g00140D,BnaC07g45200D,BnaC03g32940D,BnaA03g05780D,BnaA10g16110D,BnaAnng38530D,BnaA03g27900D,BnaC09g38970D
GO:0015995	chlorophyll biosynthetic process	biological_process	24	39262	0	0	1.38174	BnaA06g04910D,BnaA07g17040D,BnaC01g23240D,BnaC06g35410D,BnaC03g05980D,BnaC08g23140D,BnaC07g39280D,BnaCnng49000D,BnaA03g58320D,BnaCnng20460D,BnaC07g35320D,BnaC05g06170D,BnaA03g04440D,BnaC08g27800D,BnaA03g47110D,BnaC02g22900D,BnaA01g14420D,BnaA07g31590D,BnaA01g19280D,BnaA01g09270D,BnaA09g36240D,BnaA09g32370D,BnaC01g10870D,BnaC01g17000D
GO:0006002	fructose 6-phosphate metabolic process	biological_process	24	39262	0.01008	0.0193141	1.22822	BnaA07g32860D,BnaC01g05570D,BnaA03g40360D,BnaA01g07610D,BnaAnng29210D,BnaA03g10690D,BnaA06g35220D,BnaC07g31330D,BnaA01g04110D,BnaC08g41630D,BnaC09g33200D,BnaC01g09280D,BnaA09g42580D,BnaA01g15420D,BnaA06g08370D,BnaC02g12110D,BnaC03g13370D,BnaC09g22950D,BnaC07g20530D,BnaA10g10800D,BnaC05g09740D,BnaC06g37390D,BnaC01g18320D,BnaC08g35040D
GO:0006544	glycine metabolic process	biological_process	24	39262	0.0290949	0.0497732	1.18435	BnaA08g15890D,BnaAnng08840D,BnaC01g01090D,BnaA08g06130D,BnaA04g06460D,BnaC06g32430D,BnaC08g06530D,BnaA07g23560D,BnaA01g03860D,BnaCnng19300D,BnaC03g67280D,BnaA01g04520D,BnaC01g06000D,BnaCnng17010D,BnaC01g05230D,BnaC05g17330D,BnaC08g20110D,BnaAnng04180D,BnaA08g21010D,BnaA01g00170D,BnaCnng62500D,BnaA07g29260D,BnaA08g12180D,BnaC03g61150D
GO:0046836	glycolipid transport	biological_process	24	39262	0.0658802	0.104544	1.14351	BnaC02g32320D,BnaC07g14510D,BnaA05g19740D,BnaA06g15100D,BnaA05g10120D,BnaC06g30250D,BnaA04g19520D,BnaCnng62630D,BnaCnng41400D,BnaA07g27260D,BnaCnng54400D,BnaC02g32330D,BnaA07g37290D,BnaC06g04810D,BnaA01g25230D,BnaC04g43910D,BnaA03g15950D,BnaC04g10510D,BnaA08g16360D,BnaC03g19080D,BnaA02g24550D,BnaC05g16620D,BnaAnng34100D,BnaA07g27250D
GO:0006730	one-carbon metabolic process	biological_process	24	39262	0.527803	0.623354	0.975348	BnaA03g39030D,BnaC08g23920D,BnaA09g13030D,BnaA03g14190D,BnaC04g16040D,BnaA03g52900D,BnaC01g43540D,BnaC07g07790D,BnaC03g46190D,BnaC03g17150D,BnaA07g06210D,BnaC01g03830D,BnaA09g33130D,BnaA01g23510D,BnaC08g46780D,BnaC01g37290D,BnaC03g74050D,BnaAnng08830D,BnaCnng19320D,BnaA04g06420D,BnaA03g57570D,BnaC09g12980D,BnaA01g02590D,BnaA07g13710D
GO:0015743	malate transport	biological_process	24	39262	0.906314	0.971937	0.850303	BnaC02g27820D,BnaA08g26970D,BnaA06g04860D,BnaC08g37290D,BnaC03g31660D,BnaA06g12560D,BnaC08g15170D,BnaC08g13480D,BnaA03g26740D,BnaC05g06110D,BnaA09g28580D,BnaC08g13540D,BnaA08g19430D,BnaA08g26960D,BnaC05g20630D,BnaCnng01700D,BnaC05g41520D,BnaC08g13490D,BnaA09g52080D,BnaC01g34130D,BnaC05g14120D,BnaA02g20300D,BnaCnng04670D,BnaA01g26740D
GO:0009086	methionine biosynthetic process	biological_process	23	39262	0	0	1.38174	BnaC06g17620D,BnaCnng26130D,BnaA03g06790D,BnaA06g03100D,BnaA10g14580D,BnaC09g39920D,BnaA10g16880D,BnaC08g16430D,BnaA07g18600D,BnaC09g36890D,BnaA02g03770D,BnaA03g28400D,BnaC03g08690D,BnaC03g33530D,BnaC03g10390D,BnaC08g30190D,BnaC02g07610D,BnaA06g09610D,BnaC05g49480D,BnaC05g48040D,BnaA08g31400D,BnaA09g38220D,BnaA03g08190D
GO:0000103	sulfate assimilation	biological_process	23	39262	0.0129996	0.0240128	1.22231	BnaC07g17320D,BnaCnng47170D,BnaA08g16110D,BnaC05g15510D,BnaA03g36860D,BnaCnng62800D,BnaA03g38670D,BnaA06g25000D,BnaC03g48570D,BnaCnng69640D,BnaC01g00790D,BnaA01g34620D,BnaA06g14140D,BnaC09g08710D,BnaC08g19100D,BnaC07g51290D,BnaA06g36560D,BnaA03g54400D,BnaC01g22950D,BnaA05g16830D,BnaA05g37220D,BnaC05g47640D,BnaA09g08410D
GO:0006270	DNA replication initiation	biological_process	23	39262	0.0129996	0.0240128	1.22231	BnaC03g31160D,BnaC02g32200D,BnaCnng58270D,BnaC03g74180D,BnaA02g24390D,BnaA10g27860D,BnaC06g00930D,BnaAnng10190D,BnaC03g46410D,BnaA03g37670D,BnaCnng57480D,BnaCnng00060D,BnaA03g26370D,BnaCnng01120D,BnaC08g46630D,BnaCnng62610D,BnaA08g04370D,BnaA09g00540D,BnaA06g36070D,BnaA03g38130D,BnaA03g39110D,BnaC03g74400D,BnaA07g05080D
GO:0007050	cell cycle arrest	biological_process	23	39262	0.0129996	0.0240128	1.22231	BnaA03g15040D,BnaCnng42870D,BnaC03g18060D,BnaAnng16120D,BnaA05g21020D,BnaA03g37600D,BnaA04g19000D,BnaA03g40890D,BnaC04g12110D,BnaC03g40820D,BnaC09g02570D,BnaA09g41990D,BnaC06g02810D,BnaC04g43290D,BnaA06g29930D,BnaC05g33790D,BnaC08g22010D,BnaA03g35120D,BnaC07g31840D,BnaC03g73980D,BnaA06g37540D,BnaA09g03160D,BnaC07g26770D
GO:0006014	D-ribose metabolic process	biological_process	23	39262	0.237411	0.321238	1.05934	BnaA07g25850D,BnaC04g42400D,BnaA05g16180D,BnaC09g52860D,BnaAnng30390D,BnaA10g07720D,BnaA06g36460D,BnaA04g01640D,BnaA04g18320D,BnaC05g26130D,BnaA03g14420D,BnaC03g17470D,BnaC06g43510D,BnaC05g13340D,BnaA07g18380D,BnaC06g17380D,BnaC05g04100D,BnaA10g03980D,BnaC07g50370D,BnaCnng30740D,BnaC07g17460D,BnaA05g11350D,BnaC04g23060D
GO:0048193	Golgi vesicle transport	biological_process	22	39262	0.000588028	0.00129935	1.32167	BnaA07g08320D,BnaA06g32030D,BnaCnng57150D,BnaC07g24450D,BnaC07g02930D,BnaC07g11650D,BnaC02g37640D,BnaA07g36570D,BnaA08g18280D,BnaA09g27220D,BnaC07g10300D,BnaCnng51860D,BnaC05g21920D,BnaC03g58730D,BnaA08g18800D,BnaA07g01630D,BnaC02g36970D,BnaC01g08170D,BnaC03g21260D,BnaC03g68000D,BnaA08g13120D,BnaA01g06780D
GO:0006542	glutamine biosynthetic process	biological_process	22	39262	0.00432615	0.00863131	1.2666	BnaA07g15990D,BnaC05g35690D,BnaC04g29670D,BnaC06g14440D,BnaCnng57900D,BnaCnng23850D,BnaC04g30250D,BnaAnng27730D,BnaA10g17910D,BnaA04g08160D,BnaC02g06690D,BnaC03g40250D,BnaA03g34780D,BnaC08g24280D,BnaA02g12430D,BnaA04g07450D,BnaC09g41340D,BnaA02g03140D,BnaA05g22420D,BnaA09g33460D,BnaC08g07930D,BnaA08g29950D
GO:0006561	proline biosynthetic process	biological_process	22	39262	0.0167239	0.0302798	1.21593	BnaA05g05760D,BnaC04g55460D,BnaC03g72600D,BnaC04g11450D,BnaC06g16280D,BnaA10g19050D,BnaC04g05620D,BnaC04g18800D,BnaA04g02330D,BnaC09g42740D,BnaC04g12260D,BnaA03g18760D,BnaA09g36870D,BnaA04g03460D,BnaC03g63470D,BnaC03g06620D,BnaA03g05080D,BnaC04g18790D,BnaA09g35230D,BnaC08g28560D,BnaC08g26550D,BnaC04g55570D
GO:0007049	cell cycle	biological_process	22	39262	0.0167239	0.0302798	1.21593	BnaA07g33630D,BnaA04g16160D,BnaC09g45630D,BnaC03g67880D,BnaCnng05970D,BnaC03g77050D,BnaA03g51060D,BnaC04g29610D,BnaC02g00100D,BnaC04g39400D,BnaA09g08050D,BnaA08g11330D,BnaA10g21520D,BnaC01g07560D,BnaA04g07360D,BnaC06g38240D,BnaA02g00700D,BnaA08g12870D,BnaC07g42920D,BnaA05g33320D,BnaA01g06310D,BnaC09g08230D
GO:0006563	L-serine metabolic process	biological_process	22	39262	0.0452766	0.0743604	1.16917	BnaA08g15890D,BnaAnng08840D,BnaC01g01090D,BnaA08g06130D,BnaA04g06460D,BnaC06g32430D,BnaC08g06530D,BnaA07g23560D,BnaCnng19300D,BnaC03g67280D,BnaA01g04520D,BnaC01g06000D,BnaCnng17010D,BnaC05g17330D,BnaC08g20110D,BnaAnng04180D,BnaA08g21010D,BnaA01g00170D,BnaCnng62500D,BnaA07g29260D,BnaA08g12180D,BnaC03g61150D
GO:0005985	sucrose metabolic process	biological_process	22	39262	0.0965658	0.146317	1.12586	BnaC09g37040D,BnaA06g27590D,BnaA05g12940D,BnaC07g27090D,BnaC03g04660D,BnaC03g10290D,BnaC02g31640D,BnaCnng74430D,BnaA03g03230D,BnaA10g15120D,BnaC06g34330D,BnaA07g30830D,BnaA07g22680D,BnaA03g08110D,BnaC06g12120D,BnaC06g23590D,BnaA02g23460D,BnaC07g29460D,BnaC09g37470D,BnaCnng23260D,BnaC05g44340D,BnaA10g14710D
GO:0006221	pyrimidine nucleotide biosynthetic process	biological_process	22	39262	0.0965658	0.146317	1.12586	BnaA01g10530D,BnaA07g16410D,BnaC05g40560D,BnaC05g34420D,BnaC03g40610D,BnaA09g54360D,BnaA02g20460D,BnaC05g23810D,BnaA04g04090D,BnaA05g21470D,BnaC01g12060D,BnaC07g08770D,BnaA07g07050D,BnaA05g26520D,BnaC04g26270D,BnaC06g15260D,BnaC02g28040D,BnaC07g36340D,BnaA03g34870D,BnaA03g44510D,BnaC01g38590D,BnaA01g30410D
GO:0006072	glycerol-3-phosphate metabolic process	biological_process	22	39262	0.173101	0.245327	1.08566	BnaA05g29950D,BnaC01g38650D,BnaA03g19520D,BnaA07g35610D,BnaC06g40550D,BnaA04g23450D,BnaC06g19180D,BnaC05g44270D,BnaA07g35620D,BnaC04g01960D,BnaC06g42250D,BnaA05g02270D,BnaA02g19720D,BnaA07g19880D,BnaC04g32730D,BnaC04g47330D,BnaC02g37100D,BnaC05g42730D,BnaC03g23410D,BnaA05g28450D,BnaA01g31820D,BnaA07g15060D
GO:0006415	translational termination	biological_process	22	39262	0.173101	0.245327	1.08566	BnaC06g12020D,BnaA05g00820D,BnaA04g00290D,BnaC09g13000D,BnaAnng27520D,BnaCnng18880D,BnaCnng09320D,BnaC08g32590D,BnaA06g30550D,BnaCnng48150D,BnaA09g12670D,BnaA03g59530D,BnaAnng14180D,BnaC09g01130D,BnaA08g24510D,BnaC04g00470D,BnaC03g57000D,BnaC07g26240D,BnaC08g28120D,BnaC03g20980D,BnaA09g23650D,BnaC04g21100D
GO:0007010	cytoskeleton organization	biological_process	22	39262	0.173101	0.245327	1.08566	BnaC03g23480D,BnaC03g13000D,BnaC04g02110D,BnaA08g13190D,BnaC01g03880D,BnaA08g11150D,BnaC04g14870D,BnaA03g19590D,BnaC06g12200D,BnaC01g08210D,BnaA01g06850D,BnaA10g11370D,BnaA05g02390D,BnaC03g68060D,BnaC03g66050D,BnaA01g02640D,BnaC08g28360D,BnaA09g36730D,BnaC07g50870D,BnaA03g10330D,BnaAnng15630D,BnaAnng10840D
GO:0001510	RNA methylation	biological_process	22	39262	0.271796	0.359074	1.04822	BnaC08g09540D,BnaA01g10820D,BnaC07g08840D,BnaC03g38170D,BnaA10g28550D,BnaA10g27580D,BnaA01g10830D,BnaC09g43310D,BnaA06g00010D,BnaA10g19720D,BnaA03g47600D,BnaA03g33080D,BnaC01g12400D,BnaA08g05290D,BnaAnng36690D,BnaCnng03890D,BnaCnng26610D,BnaA01g10810D,BnaCnng25810D,BnaC07g39880D,BnaC01g12390D,BnaA07g07260D
GO:0030042	actin filament depolymerization	biological_process	22	39262	0.857233	0.936406	0.868524	BnaC03g11510D,BnaA10g12850D,BnaC05g00330D,BnaA03g39200D,BnaA03g39180D,BnaA05g11500D,BnaC03g11520D,BnaA01g02250D,BnaC04g13550D,BnaC07g45300D,BnaA06g18240D,BnaA09g51810D,BnaA03g09180D,BnaCnng02190D,BnaC03g55630D,BnaC03g46510D,BnaA03g09190D,BnaC01g03520D,BnaA02g06680D,BnaA10g00250D,BnaC09g35260D,BnaCnng08860D
GO:0007154	cell communication	biological_process	21	39262	0	0	1.38174	BnaA10g23580D,BnaA10g30470D,BnaC03g02880D,BnaC07g43680D,BnaC09g48300D,BnaA10g11910D,BnaA03g51930D,BnaA07g36340D,BnaC09g49290D,BnaA06g09920D,BnaAnng01620D,BnaC07g05320D,BnaC05g11540D,BnaA01g28370D,BnaA09g56730D,BnaCnng31920D,BnaC01g06300D,BnaC08g38980D,BnaC01g35630D,BnaA01g04770D,BnaA03g55530D
GO:0009094	L-phenylalanine biosynthetic process	biological_process	21	39262	0.00081263	0.00178128	1.31894	BnaCnng34620D,BnaC03g53780D,BnaA09g48960D,BnaA06g19810D,BnaC04g39340D,BnaC08g43260D,BnaA08g25130D,BnaC03g35390D,BnaC08g15080D,BnaA05g29990D,BnaC05g44320D,BnaA06g07360D,BnaA03g30110D,BnaC06g39560D,BnaA02g05780D,BnaC09g36370D,BnaC08g43250D,BnaC05g08770D,BnaA10g13820D,BnaAnng42020D,BnaA04g16070D
GO:0000162	tryptophan biosynthetic process	biological_process	21	39262	0.0561803	0.09002	1.16066	BnaC09g39860D,BnaC03g02240D,BnaC02g07710D,BnaC09g49740D,BnaA02g03850D,BnaC03g26270D,BnaA03g01690D,BnaA10g16850D,BnaA10g24820D,BnaA03g48400D,BnaA03g21950D,BnaC04g30980D,BnaC09g31260D,BnaC07g40410D,BnaCnng41850D,BnaA04g08710D,BnaA04g27890D,BnaA06g13600D,BnaC04g34370D,BnaA10g09090D,BnaA07g14490D
GO:0030833	regulation of actin filament polymerization	biological_process	21	39262	0.0561803	0.09002	1.16066	BnaA09g14200D,BnaC04g13710D,BnaCnng28290D,BnaC03g56850D,BnaC07g08720D,BnaA09g01850D,BnaC05g51270D,BnaA06g07560D,BnaC07g49030D,BnaA05g10190D,BnaA07g07040D,BnaA06g24200D,BnaC09g14740D,BnaA09g25680D,BnaC05g09010D,BnaA05g11780D,BnaC03g17160D,BnaA06g32490D,BnaA08g24380D,BnaC09g01290D,BnaA03g14200D
GO:0009082	branched-chain amino acid biosynthetic process	biological_process	21	39262	0.202325	0.27788	1.07469	BnaC06g16700D,BnaC09g21470D,BnaA03g14730D,BnaC03g17780D,BnaC02g06500D,BnaA07g17940D,BnaA05g11160D,BnaA01g20380D,BnaA02g03040D,BnaC04g42560D,BnaC04g23500D,BnaA04g18470D,BnaC08g29320D,BnaC01g25380D,BnaA07g05810D,BnaA09g55140D,BnaA04g01910D,BnaA09g55150D,BnaC04g12850D,BnaA01g23200D,BnaC01g30200D
GO:0006164	purine nucleotide biosynthetic process	biological_process	21	39262	0.65576	0.75548	0.93602	BnaA01g11300D,BnaC04g10270D,BnaA05g22660D,BnaA05g08860D,BnaC03g41880D,BnaC04g55430D,BnaCnng07310D,BnaC09g12810D,BnaC08g28630D,BnaA04g29080D,BnaA04g02300D,BnaC06g39880D,BnaA09g12410D,BnaA03g36030D,BnaA01g25350D,BnaA07g17380D,BnaC05g12460D,BnaA09g36930D,BnaC01g32240D,BnaA06g10940D,BnaA07g34950D
GO:0009081	branched-chain amino acid metabolic process	biological_process	21	39262	0.65576	0.75548	0.93602	BnaA09g57250D,BnaA06g15650D,BnaA08g02290D,BnaC08g13960D,BnaC08g48510D,BnaC03g68450D,BnaA02g12300D,BnaAnng29280D,BnaC08g42400D,BnaA06g37960D,BnaC08g13970D,BnaC03g41100D,BnaCnng26670D,BnaC05g07810D,BnaA08g26000D,BnaA06g37970D,BnaC06g03270D,BnaC05g33030D,BnaC03g68440D,BnaA01g20890D,BnaA08g26010D
GO:0006564	L-serine biosynthetic process	biological_process	20	39262	0.00112301	0.00241653	1.31595	BnaC09g09440D,BnaC07g44840D,BnaC01g04190D,BnaA08g11320D,BnaC08g18180D,BnaC08g17520D,BnaC03g40970D,BnaA03g50990D,BnaC03g77030D,BnaA03g35260D,BnaA06g25700D,BnaC03g62400D,BnaA08g22970D,BnaC05g14320D,BnaA08g14930D,BnaA06g12800D,BnaA09g09210D,BnaA06g25710D,BnaA08g22510D,BnaA01g02930D
GO:0006606	protein import into nucleus	biological_process	20	39262	0.0694395	0.108826	1.15145	BnaC01g22030D,BnaA06g05340D,BnaC07g33450D,BnaA05g31550D,BnaA03g42370D,BnaCnng06740D,BnaA07g34790D,BnaA01g17690D,BnaC05g06830D,BnaC02g28060D,BnaC06g19930D,BnaA08g06090D,BnaA08g26520D,BnaCnng45030D,BnaA07g20390D,BnaC05g01390D,BnaC08g48070D,BnaC05g46090D,BnaA02g20480D,BnaC06g39690D
GO:0008643	carbohydrate transport	biological_process	20	39262	0.0694395	0.108826	1.15145	BnaA01g02070D,BnaA06g23940D,BnaC07g45560D,BnaA09g07070D,BnaA03g53270D,BnaA04g24910D,BnaC03g49310D,BnaC01g03220D,BnaA04g01650D,BnaUnng00460D,BnaC04g48740D,BnaCnng31630D,BnaA04g11360D,BnaA09g37700D,BnaC09g06770D,BnaC08g48850D,BnaA08g15010D,BnaC03g62270D,BnaC04g23090D,BnaA03g20150D
GO:0009231	riboflavin biosynthetic process	biological_process	20	39262	0.0694395	0.108826	1.15145	BnaA09g42620D,BnaC03g03500D,BnaC09g06310D,BnaA06g23420D,BnaA09g06790D,BnaC08g35080D,BnaC04g49410D,BnaA03g02490D,BnaA06g17470D,BnaC07g00180D,BnaA04g25520D,BnaC03g24640D,BnaA08g09970D,BnaC03g49870D,BnaA01g11320D,BnaA03g20600D,BnaC03g64500D,BnaC01g12760D,BnaA07g00510D,BnaC03g75520D
GO:0006526	arginine biosynthetic process	biological_process	20	39262	0.235228	0.319072	1.06288	BnaC09g32890D,BnaC04g55460D,BnaC09g51280D,BnaA03g54190D,BnaC04g07830D,BnaA04g21470D,BnaA03g46970D,BnaC04g45220D,BnaA05g07020D,BnaC07g46690D,BnaA04g02330D,BnaA01g14190D,BnaA09g36870D,BnaC01g16690D,BnaC07g39150D,BnaC08g28560D,BnaA01g00340D,BnaA09g12570D,BnaC01g01340D,BnaCnng23430D
GO:0016571	histone methylation	biological_process	20	39262	0.350389	0.447931	1.02351	BnaC03g06140D,BnaC03g01840D,BnaC04g43670D,BnaC06g43880D,BnaC09g50300D,BnaC06g43300D,BnaA03g04610D,BnaC02g02520D,BnaA07g22850D,BnaA04g13190D,BnaC09g50310D,BnaC08g24970D,BnaC04g10170D,BnaA09g34050D,BnaA04g19330D,BnaA07g30600D,BnaA10g25310D,BnaA03g01550D,BnaC04g35290D,BnaA05g08770D
GO:0006621	protein retention in ER lumen	biological_process	20	39262	0.47312	0.569068	0.986959	BnaAnng21400D,BnaC03g60180D,BnaAnng32910D,BnaA08g17990D,BnaA03g37630D,BnaA09g26900D,BnaC06g36420D,BnaCnng70760D,BnaCnng62290D,BnaA09g43350D,BnaA07g21590D,BnaCnng21930D,BnaC05g22350D,BnaCnng00150D,BnaC06g22200D,BnaC07g47610D,BnaC08g35960D,BnaC06g17760D,BnaA07g05160D,BnaA08g16910D
GO:0006779	porphyrin-containing compound biosynthetic process	biological_process	20	39262	0.697458	0.789465	0.921162	BnaA04g10650D,BnaA09g06520D,BnaC08g45590D,BnaCnng15780D,BnaA04g23300D,BnaA03g58320D,BnaC04g32950D,BnaA10g01960D,BnaC07g35320D,BnaA09g50920D,BnaA10g19460D,BnaCnng43160D,BnaC09g54390D,BnaA05g24620D,BnaA10g01010D,BnaC05g01120D,BnaC04g47210D,BnaC05g38600D,BnaA01g09270D,BnaC01g10870D
GO:0006816	calcium ion transport	biological_process	19	39262	0.00155193	0.00330918	1.31266	BnaC03g37860D,BnaA03g41510D,BnaA03g32760D,BnaC08g42380D,BnaA04g21850D,BnaA05g26020D,BnaC06g11060D,BnaA05g06490D,BnaC05g40050D,BnaA08g00350D,BnaC04g45720D,BnaC05g07470D,BnaC01g37750D,BnaCnng03980D,BnaA06g05910D,BnaC04g07160D,BnaA01g29870D,BnaA10g27650D,BnaC07g32560D
GO:0006909	phagocytosis	biological_process	19	39262	0.0101303	0.019343	1.25015	BnaC06g42810D,BnaA07g18620D,BnaC05g48130D,BnaA04g25860D,BnaC08g30510D,BnaA04g01270D,BnaC01g40640D,BnaA09g38350D,BnaA10g02040D,BnaC03g24990D,BnaC04g22210D,BnaA02g13110D,BnaA05g32830D,BnaA03g20920D,BnaC02g45750D,BnaC04g49830D,BnaA08g27530D,BnaC05g01970D,BnaA01g34090D
GO:0016117	carotenoid biosynthetic process	biological_process	19	39262	0.16563	0.235958	1.09388	BnaAnng25740D,BnaA05g28540D,BnaC05g42860D,BnaC03g18000D,BnaC09g15740D,BnaC03g76050D,BnaA09g49740D,BnaA01g26060D,BnaA04g06150D,BnaA10g11050D,BnaC08g44970D,BnaA08g17160D,BnaA09g15170D,BnaAnng10690D,BnaA03g14980D,BnaC04g28970D,BnaC03g13170D,BnaC05g46990D,BnaC09g53690D
GO:0015976	carbon utilization	biological_process	19	39262	0.519974	0.617657	0.972338	BnaC03g49820D,BnaC01g27750D,BnaC03g66520D,BnaCnng45250D,BnaC07g13050D,BnaCnng63520D,BnaA06g04110D,BnaCnng31770D,BnaCnng45230D,BnaA07g38790D,BnaA01g21620D,BnaA09g29930D,BnaA03g52570D,BnaA08g11540D,BnaC01g04640D,BnaC07g44310D,BnaA02g14850D,BnaAnng15140D,BnaA01g03360D
GO:0000910	cytokinesis	biological_process	19	39262	0.637109	0.73813	0.937611	BnaC05g21560D,BnaC09g31680D,BnaA10g09470D,BnaA03g11490D,BnaC01g18970D,BnaA09g27700D,BnaA01g15880D,BnaA04g15970D,BnaC04g55380D,BnaA08g14310D,BnaC02g13200D,BnaA06g34430D,BnaC08g12300D,BnaA09g45540D,BnaA02g09170D,BnaC07g21370D,BnaC03g14320D,BnaC04g45880D,BnaC08g39380D
GO:0042546	cell wall biogenesis	biological_process	19	39262	0.990535	1	0.729253	BnaAnng36810D,BnaA08g24120D,BnaA07g03820D,BnaA09g45840D,BnaC06g23050D,BnaC07g22150D,BnaC05g10350D,BnaCnng39570D,BnaA09g45850D,BnaA06g38160D,BnaC08g39910D,BnaA06g33800D,BnaA07g22250D,BnaA08g24090D,BnaC07g22140D,BnaC05g10370D,BnaC08g16010D,BnaCnng39900D,BnaA06g33810D
GO:0006189	'de novo' IMP biosynthetic process	biological_process	18	39262	0.00214466	0.00446872	1.30902	BnaC03g20870D,BnaC04g45420D,BnaCnng40800D,BnaA07g22320D,BnaA04g29130D,BnaA06g40040D,BnaC07g20200D,BnaC06g15570D,BnaA09g25330D,BnaC08g25860D,BnaC01g41710D,BnaA07g16600D,BnaCnng21160D,BnaA03g17360D,BnaA07g31390D,BnaC06g23160D,BnaA09g54810D,BnaA01g35320D
GO:0016570	histone modification	biological_process	18	39262	0.0134065	0.0247088	1.24357	BnaA03g41160D,BnaCnng18930D,BnaC02g01100D,BnaA06g36630D,BnaC07g17240D,BnaC08g48800D,BnaA09g52320D,BnaA09g54650D,BnaAnng06060D,BnaA07g29210D,BnaA02g32860D,BnaC01g23510D,BnaC09g09020D,BnaC09g06070D,BnaA09g08750D,BnaA01g36060D,BnaC01g29000D,BnaC07g32070D
GO:0015770	sucrose transport	biological_process	18	39262	0.312543	0.40398	1.03631	BnaA07g23350D,BnaC07g13570D,BnaC08g42460D,BnaA02g26600D,BnaA07g29680D,BnaC02g20830D,BnaA09g30430D,BnaA09g57200D,BnaA06g05900D,BnaC06g32880D,BnaC05g17970D,BnaC05g49240D,BnaC02g34840D,BnaA02g15620D,BnaA07g10320D,BnaC07g21980D,BnaCnng07770D,BnaA06g33960D
GO:0006536	glutamate metabolic process	biological_process	18	39262	0.567929	0.666911	0.956591	BnaA07g25530D,BnaA06g19240D,BnaC06g27330D,BnaA02g26140D,BnaC03g54190D,BnaC04g12030D,BnaA03g06540D,BnaC02g34260D,BnaC09g40620D,BnaA03g06510D,BnaAnng27540D,BnaA03g06580D,BnaC04g12040D,BnaC03g08350D,BnaA09g18890D,BnaA03g06520D,BnaC09g52280D,BnaCnng71810D
GO:0015977	carbon fixation	biological_process	18	39262	0.681822	0.780039	0.921162	BnaC04g02430D,BnaA03g33640D,BnaC05g38590D,BnaA05g24610D,BnaCnng24040D,BnaC03g69540D,BnaA09g28740D,BnaC05g20500D,BnaA10g13950D,BnaC06g09980D,BnaC04g48440D,BnaC01g36480D,BnaA08g01200D,BnaA04g24600D,BnaA01g34300D,BnaA05g34260D,BnaC03g38810D,BnaC01g36490D
GO:0006749	glutathione metabolic process	biological_process	18	39262	0.99811	1	0.672199	BnaA01g05660D,BnaC07g07510D,BnaA01g05630D,BnaA09g02940D,BnaC07g41840D,BnaAnng31940D,BnaA03g49430D,BnaA04g04050D,BnaC01g00520D,BnaA03g37200D,BnaA01g07620D,BnaC08g25420D,BnaA03g49440D,BnaC04g26180D,BnaA07g06010D,BnaC01g09290D,BnaC03g43500D,BnaC01g00540D
GO:0006541	glutamine metabolic process	biological_process	17	39262	0	0	1.38174	BnaC04g30680D,BnaC06g39060D,BnaC02g16960D,BnaA09g45270D,BnaA07g37540D,BnaC05g11360D,BnaA04g08450D,BnaC08g39080D,BnaA07g34300D,BnaA07g37550D,BnaA02g12600D,BnaC06g39080D,BnaA06g09790D,BnaA02g19000D,BnaC06g12280D,BnaA07g34310D,BnaC02g25180D
GO:0030259	lipid glycosylation	biological_process	17	39262	0	0	1.38174	BnaA01g32510D,BnaA03g51720D,BnaA03g29780D,BnaC01g20060D,BnaCnng51890D,BnaA10g28120D,BnaC05g44970D,BnaA10g09020D,BnaC03g35020D,BnaA07g39040D,BnaAnng13410D,BnaC01g06700D,BnaA09g08200D,BnaC09g08430D,BnaC06g34580D,BnaA01g05080D,BnaA05g30520D
GO:0006165	nucleoside diphosphate phosphorylation	biological_process	17	39262	0.00296374	0.00600788	1.30498	BnaA09g22160D,BnaC02g28980D,BnaC03g51050D,BnaCnng15800D,BnaA01g13520D,BnaC03g70690D,BnaC09g51980D,BnaA09g06530D,BnaA06g22660D,BnaC08g48350D,BnaA08g23130D,BnaC01g15740D,BnaC09g26080D,BnaA08g00390D,BnaCnng73880D,BnaA02g21890D,BnaA09g17360D
GO:0006183	GTP biosynthetic process	biological_process	17	39262	0.00296374	0.00600788	1.30498	BnaA09g22160D,BnaC02g28980D,BnaC03g51050D,BnaCnng15800D,BnaA01g13520D,BnaC03g70690D,BnaC09g51980D,BnaA09g06530D,BnaA06g22660D,BnaC08g48350D,BnaA08g23130D,BnaC01g15740D,BnaC09g26080D,BnaA08g00390D,BnaCnng73880D,BnaA02g21890D,BnaA09g17360D
GO:0006228	UTP biosynthetic process	biological_process	17	39262	0.00296374	0.00600788	1.30498	BnaA09g22160D,BnaC02g28980D,BnaC03g51050D,BnaCnng15800D,BnaA01g13520D,BnaC03g70690D,BnaC09g51980D,BnaA09g06530D,BnaA06g22660D,BnaC08g48350D,BnaA08g23130D,BnaC01g15740D,BnaC09g26080D,BnaA08g00390D,BnaCnng73880D,BnaA02g21890D,BnaA09g17360D
GO:0006241	CTP biosynthetic process	biological_process	17	39262	0.00296374	0.00600788	1.30498	BnaA09g22160D,BnaC02g28980D,BnaC03g51050D,BnaCnng15800D,BnaA01g13520D,BnaC03g70690D,BnaC09g51980D,BnaA09g06530D,BnaA06g22660D,BnaC08g48350D,BnaA08g23130D,BnaC01g15740D,BnaC09g26080D,BnaA08g00390D,BnaCnng73880D,BnaA02g21890D,BnaA09g17360D
GO:0006605	protein targeting	biological_process	17	39262	0.00296374	0.00600788	1.30498	BnaA01g18890D,BnaA03g47010D,BnaC08g20330D,BnaC01g16760D,BnaC03g27880D,BnaA01g14270D,BnaC08g19900D,BnaA02g11680D,BnaA06g16430D,BnaC02g16070D,BnaC03g31400D,BnaA03g26540D,BnaC01g22220D,BnaA08g21240D,BnaA03g23500D,BnaC07g39190D,BnaA01g18280D
GO:0009435	NAD biosynthetic process	biological_process	17	39262	0.00296374	0.00600788	1.30498	BnaC03g14040D,BnaC09g32370D,BnaA08g00710D,BnaC02g33940D,BnaA03g53820D,BnaCnng77330D,BnaA10g06200D,BnaC03g70140D,BnaC07g51220D,BnaA10g19090D,BnaC09g42780D,BnaA09g42000D,BnaA03g11210D,BnaA06g00540D,BnaCnng42860D,BnaA10g09920D,BnaA02g26970D
GO:0016114	terpenoid biosynthetic process	biological_process	17	39262	0.00296374	0.00600788	1.30498	BnaC09g54000D,BnaC09g12520D,BnaA07g12950D,BnaC09g53990D,BnaA03g41980D,BnaC07g33090D,BnaA10g13400D,BnaC03g42170D,BnaA09g11320D,BnaC09g11760D,BnaA09g11790D,BnaA03g36320D,BnaA10g21120D,BnaA01g35430D,BnaC04g17180D,BnaC01g22400D,BnaC09g45250D
GO:0030150	protein import into mitochondrial matrix	biological_process	17	39262	0.00296374	0.00600788	1.30498	BnaC09g12290D,BnaC06g17250D,BnaUnng00560D,BnaC09g11950D,BnaA09g37660D,BnaA04g11290D,BnaA09g34530D,BnaA07g18290D,BnaC06g13590D,BnaC04g23130D,BnaCnng11090D,BnaA09g12040D,BnaAnng20480D,BnaC08g48900D,BnaA04g01690D,BnaA06g39090D,BnaA09g11500D
GO:0046907	intracellular transport	biological_process	17	39262	0.00296374	0.00600788	1.30498	BnaC06g05290D,BnaC03g16570D,BnaA02g21600D,BnaC05g04930D,BnaC09g23770D,BnaC08g02020D,BnaAnng15790D,BnaC08g45160D,BnaA03g13680D,BnaA06g01570D,BnaA08g28880D,BnaA10g04580D,BnaA05g14900D,BnaC06g09670D,BnaA09g21380D,BnaCnng23830D,BnaC08g02070D
GO:0051205	protein insertion into membrane	biological_process	17	39262	0.00296374	0.00600788	1.30498	BnaC03g54840D,BnaC07g11070D,BnaA06g21500D,BnaC01g20030D,BnaA04g16690D,BnaC05g21050D,BnaC02g16360D,BnaC03g52000D,BnaA02g11910D,BnaA06g39020D,BnaC03g25820D,BnaA09g28180D,BnaA02g33120D,BnaC04g40040D,BnaC03g20780D,BnaA03g21410D,BnaA07g36790D
GO:0006777	Mo-molybdopterin cofactor biosynthetic process	biological_process	17	39262	0.0177073	0.031815	1.2363	BnaA03g14790D,BnaA09g22650D,BnaC04g03060D,BnaC03g17830D,BnaA10g26570D,BnaCnng02810D,BnaC03g10400D,BnaAnng00640D,BnaCnng08640D,BnaA03g00890D,BnaC04g49300D,BnaA05g03530D,BnaC09g24670D,BnaC03g01220D,BnaA03g08200D,BnaA04g25410D,BnaC02g03100D
GO:0045226	extracellular polysaccharide biosynthetic process	biological_process	17	39262	0.0177073	0.031815	1.2363	BnaA01g29180D,BnaC05g38810D,BnaC01g36590D,BnaCnng31530D,BnaA06g00900D,BnaA06g11470D,BnaC06g38990D,BnaCnng72830D,BnaC02g27520D,BnaA02g36450D,BnaCnng35880D,BnaA09g12970D,BnaC06g06370D,BnaC09g12890D,BnaA05g24780D,BnaA06g08030D,BnaC05g13120D
GO:0006825	copper ion transport	biological_process	17	39262	0.231174	0.314351	1.06771	BnaA01g28840D,BnaA03g30980D,BnaC03g31370D,BnaAnng05310D,BnaCnng24160D,BnaC04g20290D,BnaC09g11230D,BnaC06g06070D,BnaA09g53530D,BnaA09g10950D,BnaA02g23620D,BnaA06g01220D,BnaA10g06240D,BnaC07g18200D,BnaC01g36110D,BnaA05g29370D,BnaC03g31360D
GO:0008283	cell proliferation	biological_process	17	39262	0.356947	0.454548	1.02129	BnaCnng02630D,BnaC02g16840D,BnaA01g20950D,BnaC01g26290D,BnaC03g48770D,BnaA09g46190D,BnaC08g40250D,BnaAnng04050D,BnaC01g23910D,BnaA04g13330D,BnaC04g35420D,BnaC08g21380D,BnaA06g08580D,BnaAnng03380D,BnaA06g24820D,BnaA08g15770D,BnaA10g26410D
GO:0006597	spermine biosynthetic process	biological_process	17	39262	0.725297	0.813361	0.903447	BnaA10g18360D,BnaC05g48280D,BnaC09g41900D,BnaAnng08590D,BnaC05g22370D,BnaC03g07500D,BnaA05g33510D,BnaA03g07430D,BnaAnng36830D,BnaC03g09400D,BnaC06g00140D,BnaC03g32940D,BnaA03g05780D,BnaA10g16110D,BnaAnng38530D,BnaA03g27900D,BnaC09g38970D
GO:0006094	gluconeogenesis	biological_process	16	39262	0	0	1.38174	BnaA09g16190D,BnaC02g43920D,BnaA03g54330D,BnaC07g39050D,BnaA06g24600D,BnaA01g13990D,BnaC09g16980D,BnaA01g00210D,BnaC01g16480D,BnaC07g46800D,BnaA03g46830D,BnaA06g24610D,BnaAnng05000D,BnaC09g16990D,BnaCnng13230D,BnaC01g01140D
GO:0006537	glutamate biosynthetic process	biological_process	16	39262	0	0	1.38174	BnaC02g38230D,BnaAnng37880D,BnaA03g19380D,BnaC04g31100D,BnaC03g23220D,BnaA04g23740D,BnaC04g47520D,BnaC03g15020D,BnaCnng10340D,BnaC07g26120D,BnaA10g26060D,BnaA06g39660D,BnaC03g15030D,BnaAnng07910D,BnaA03g12250D,BnaA09g02760D
GO:0006694	steroid biosynthetic process	biological_process	16	39262	0.00409562	0.00820122	1.30046	BnaCnng20770D,BnaC06g37250D,BnaC04g02920D,BnaA10g05250D,BnaA07g32310D,BnaA05g03320D,BnaA09g40620D,BnaC06g00160D,BnaCnng74930D,BnaC05g26540D,BnaA03g15520D,BnaC03g18740D,BnaC08g33090D,BnaC06g36760D,BnaC02g04950D,BnaA07g32770D
GO:0006744	ubiquinone biosynthetic process	biological_process	16	39262	0.154952	0.221129	1.10539	BnaC02g35100D,BnaC07g22470D,BnaA06g13240D,BnaC07g07550D,BnaA04g17950D,BnaC01g15470D,BnaA06g39820D,BnaC08g18610D,BnaC05g14800D,BnaA08g22210D,BnaC04g41560D,BnaA07g06040D,BnaC05g48350D,BnaAnng29750D,BnaC07g50260D,BnaA01g13340D
GO:0006817	phosphate ion transport	biological_process	16	39262	0.154952	0.221129	1.10539	BnaA05g06210D,BnaC04g46050D,BnaC07g23650D,BnaAnng14200D,BnaA04g22280D,BnaA06g32820D,BnaC03g18410D,BnaC03g72240D,BnaA02g22250D,BnaA05g06230D,BnaCnng37050D,BnaC04g06470D,BnaA05g06200D,BnaA03g18250D,BnaC09g01110D,BnaA06g36740D
GO:0015696	ammonium transport	biological_process	16	39262	0.154952	0.221129	1.10539	BnaC04g07100D,BnaA09g00320D,BnaCnng62050D,BnaA05g06450D,BnaA01g23190D,BnaA04g21900D,BnaC04g07090D,BnaUnng02430D,BnaC03g74280D,BnaC04g56650D,BnaA07g05760D,BnaA03g37270D,BnaC06g11810D,BnaC08g08610D,BnaA05g35560D,BnaCnng01740D
GO:0072488	ammonium transmembrane transport	biological_process	16	39262	0.154952	0.221129	1.10539	BnaC04g07100D,BnaA09g00320D,BnaCnng62050D,BnaA05g06450D,BnaA01g23190D,BnaA04g21900D,BnaC04g07090D,BnaUnng02430D,BnaC03g74280D,BnaC04g56650D,BnaA07g05760D,BnaA03g37270D,BnaC06g11810D,BnaC08g08610D,BnaA05g35560D,BnaCnng01740D
GO:0009107	lipoate biosynthetic process	biological_process	16	39262	0.270672	0.359074	1.05276	BnaA02g32880D,BnaA01g06090D,BnaC05g49020D,BnaC08g36170D,BnaC03g03570D,BnaC02g41630D,BnaC03g03580D,BnaA03g55720D,BnaC02g01120D,BnaC03g77390D,BnaA08g12720D,BnaA10g02780D,BnaA03g55730D,BnaAnng06100D,BnaC01g07340D,BnaA09g43570D
GO:0006568	tryptophan metabolic process	biological_process	16	39262	0.964756	1	0.762341	BnaA09g34470D,BnaC09g00060D,BnaA03g57920D,BnaA09g09540D,BnaC07g26290D,BnaA06g30380D,BnaC02g02230D,BnaA08g25220D,BnaAnng01410D,BnaA03g48400D,BnaC09g31260D,BnaC07g40410D,BnaA09g00950D,BnaA10g09090D,BnaC08g25400D,BnaC03g44420D
GO:0006914	autophagy	biological_process	15	39262	0.00565973	0.0111432	1.29538	BnaC02g31920D,BnaA03g50540D,BnaC09g40670D,BnaA07g18980D,BnaC06g42970D,BnaA02g03500D,BnaC01g07590D,BnaC03g67910D,BnaA08g12890D,BnaC06g18000D,BnaC07g42910D,BnaA02g24140D,BnaC02g07200D,BnaA01g06340D,BnaA10g17380D
GO:0009165	nucleotide biosynthetic process	biological_process	15	39262	0.00565973	0.0111432	1.29538	BnaA03g39030D,BnaC05g28770D,BnaA05g08630D,BnaC05g08230D,BnaA03g52900D,BnaC04g49680D,BnaA06g06560D,BnaC03g46190D,BnaA03g23120D,BnaC01g03830D,BnaC05g24530D,BnaC04g09710D,BnaA04g25770D,BnaA09g24370D,BnaA01g02590D
GO:0006400	tRNA modification	biological_process	15	39262	0.0306855	0.0521147	1.21919	BnaC09g40260D,BnaA03g14610D,BnaC09g04300D,BnaC04g13020D,BnaC01g02320D,BnaA06g27270D,BnaA09g04780D,BnaA10g17070D,BnaC09g04250D,BnaA07g33870D,BnaA05g35350D,BnaC07g29710D,BnaA01g01310D,BnaC06g38500D,BnaC03g17620D
GO:0006487	protein N-linked glycosylation	biological_process	15	39262	0.186932	0.263339	1.09085	BnaAnng27230D,BnaC03g56970D,BnaA07g38690D,BnaC05g09150D,BnaA08g24480D,BnaA10g19260D,BnaC07g24460D,BnaA09g08260D,BnaC09g08510D,BnaC09g43030D,BnaA06g32020D,BnaA03g04910D,BnaC03g06510D,BnaC06g26260D,BnaA06g07720D
GO:0051276	chromosome organization	biological_process	15	39262	0.186932	0.263339	1.09085	BnaC04g26130D,BnaC07g25420D,BnaAnng14600D,BnaCnng15200D,BnaA06g31190D,BnaC04g38670D,BnaAnng06390D,BnaA06g17360D,BnaA09g34490D,BnaC03g43960D,BnaA03g40230D,BnaC03g74950D,BnaC07g49890D,BnaC08g25430D,BnaA06g21840D
GO:0009098	leucine biosynthetic process	biological_process	15	39262	0.456234	0.558904	0.986959	BnaC02g22980D,BnaC03g24020D,BnaC04g52970D,BnaA09g44550D,BnaA05g34460D,BnaC05g14180D,BnaA07g35490D,BnaC06g40420D,BnaA02g19640D,BnaA05g34440D,BnaA03g20030D,BnaA06g12630D,BnaA02g02020D,BnaC04g52960D,BnaC08g37250D
GO:0043161	proteasome-mediated ubiquitin-dependent protein catabolic process	biological_process	15	39262	0.456234	0.558904	0.986959	BnaC05g12320D,BnaA04g08670D,BnaA06g25920D,BnaCnng32650D,BnaA01g02130D,BnaC04g30910D,BnaC03g33000D,BnaA07g14440D,BnaA07g20230D,BnaA06g10810D,BnaA09g56400D,BnaC06g19700D,BnaC08g38480D,BnaA03g27960D,BnaC03g47520D
GO:0046470	phosphatidylcholine metabolic process	biological_process	15	39262	0.592952	0.691848	0.942098	BnaC07g45790D,BnaA02g32010D,BnaA03g24870D,BnaC07g29390D,BnaAnng13600D,BnaA03g24880D,BnaAnng08250D,BnaCnng23890D,BnaC06g07140D,BnaA05g23740D,BnaC05g37540D,BnaA10g00160D,BnaA06g00490D,BnaC02g40590D,BnaC01g35830D
GO:0009690	cytokinin metabolic process	biological_process	15	39262	0.711665	0.800805	0.901137	BnaA03g49660D,BnaC08g32840D,BnaAnng09190D,BnaCnng41060D,BnaC07g50850D,BnaC06g36220D,BnaA02g05340D,BnaA04g23980D,BnaA03g19500D,BnaC09g36710D,BnaC04g01930D,BnaC03g23380D,BnaA02g08420D,BnaA09g40400D,BnaC04g47740D
GO:0006168	adenine salvage	biological_process	14	39262	0	0	1.38174	BnaC07g37320D,BnaA08g18960D,BnaA09g27900D,BnaA02g00860D,BnaA03g45390D,BnaC09g45400D,BnaA10g21290D,BnaCnng33750D,BnaC05g51080D,BnaA07g35830D,BnaA07g19820D,BnaC03g57700D,BnaCnng53700D,BnaCnng20130D
GO:0006556	S-adenosylmethionine biosynthetic process	biological_process	14	39262	0	0	1.38174	BnaCnng75920D,BnaA05g00770D,BnaA03g26530D,BnaA03g16860D,BnaA09g00390D,BnaA03g34510D,BnaCnng16700D,BnaA01g36920D,BnaC04g08360D,BnaC03g39970D,BnaC04g00410D,BnaC03g31390D,BnaC03g20310D,BnaA05g07530D
GO:0006790	sulfur compound metabolic process	biological_process	14	39262	0	0	1.38174	BnaC09g30760D,BnaA06g23130D,BnaC03g50280D,BnaC09g06200D,BnaA06g23140D,BnaA09g06680D,BnaA02g34000D,BnaC03g50260D,BnaCnng16680D,BnaA10g08220D,BnaA06g23120D,BnaC03g50270D,BnaAnng21580D,BnaC02g42860D
GO:0016485	protein processing	biological_process	14	39262	0	0	1.38174	BnaA03g14440D,BnaC03g17490D,BnaA06g38990D,BnaC03g54000D,BnaC03g74930D,BnaA06g19730D,BnaA04g05310D,BnaC09g42450D,BnaAnng37220D,BnaA09g55830D,BnaC04g28040D,BnaC08g33540D,BnaC02g06060D,BnaA10g18730D
GO:0044070	regulation of anion transport	biological_process	14	39262	0	0	1.38174	BnaC03g12920D,BnaC03g32540D,BnaA03g27530D,BnaA10g29750D,BnaA02g02470D,BnaC09g32780D,BnaCnng52100D,BnaCnng42590D,BnaA10g11490D,BnaCnng35410D,BnaA05g37480D,BnaCnng35390D,BnaA03g10240D,BnaCnng05760D
GO:0006207	'de novo' pyrimidine nucleobase biosynthetic process	biological_process	14	39262	0.00782112	0.015127	1.28963	BnaA05g18730D,BnaA07g16410D,BnaA06g26030D,BnaA09g05380D,BnaC02g42200D,BnaCnng10890D,BnaA04g04090D,BnaA07g12440D,BnaC05g31710D,BnaA06g37480D,BnaC08g07870D,BnaC04g26270D,BnaC06g15260D,BnaCnng69620D
GO:0032012	regulation of ARF protein signal transduction	biological_process	14	39262	0.00782112	0.015127	1.28963	BnaA01g02040D,BnaA07g14720D,BnaCnng11970D,BnaA10g15550D,BnaC05g10230D,BnaCnng09000D,BnaA06g08910D,BnaCnng34260D,BnaA04g01040D,BnaC04g31600D,BnaA04g09370D,BnaC04g55240D,BnaC01g03180D,BnaA06g40870D
GO:0032957	inositol trisphosphate metabolic process	biological_process	14	39262	0.00782112	0.015127	1.28963	BnaC01g04480D,BnaA03g50630D,BnaA01g03220D,BnaA03g38640D,BnaC04g03240D,BnaA10g17710D,BnaC03g07940D,BnaC09g41080D,BnaAnng34680D,BnaC04g03250D,BnaA03g06170D,BnaCnng47190D,BnaC07g44490D,BnaA05g03660D
GO:0030418	nicotianamine biosynthetic process	biological_process	14	39262	0.111915	0.166506	1.13791	BnaC01g27290D,BnaA01g35270D,BnaA06g05310D,BnaC02g12500D,BnaC09g50280D,BnaA03g01570D,BnaC03g01850D,BnaA02g35470D,BnaC05g06800D,BnaA10g25290D,BnaC09g32590D,BnaA10g10170D,BnaA09g15990D,BnaC01g18590D
GO:0016042	lipid catabolic process	biological_process	14	39262	0.363692	0.46242	1.01813	BnaC03g32080D,BnaCnng35860D,BnaA01g29610D,BnaA05g14430D,BnaA03g27100D,BnaC08g20710D,BnaA06g16240D,BnaC04g30400D,BnaC01g37230D,BnaC07g33410D,BnaA03g42330D,BnaA07g01090D,BnaC07g01540D,BnaA04g08230D
GO:0006306	DNA methylation	biological_process	14	39262	0.756978	0.84543	0.879291	BnaA01g09820D,BnaC08g34700D,BnaA02g02230D,BnaA09g42250D,BnaA06g27730D,BnaA07g28030D,BnaC09g42890D,BnaA02g02240D,BnaC06g30720D,BnaA06g07080D,BnaA10g19200D,BnaC05g08730D,BnaC01g11520D,BnaC07g29260D
GO:0019953	sexual reproduction	biological_process	14	39262	0.998729	1	0.624013	BnaC01g20780D,BnaC07g34020D,BnaA07g00550D,BnaC07g00140D,BnaCnng78620D,BnaA03g58790D,BnaAnng33580D,BnaC07g50680D,BnaA05g04560D,BnaA03g58070D,BnaA01g18000D,BnaC01g21280D,BnaA03g42880D,BnaA06g40800D
GO:0006338	chromatin remodeling	biological_process	13	39262	0.0108079	0.0202835	1.28305	BnaA04g26950D,BnaC05g35950D,BnaA05g00690D,BnaC02g08260D,BnaA05g30940D,BnaAnng03220D,BnaC05g45420D,BnaA05g22680D,BnaC04g52380D,BnaA10g16340D,BnaC09g39190D,BnaC04g51430D,BnaC04g27420D
GO:0006885	regulation of pH	biological_process	13	39262	0.0108079	0.0202835	1.28305	BnaA07g35030D,BnaA07g20250D,BnaC05g46790D,BnaC06g19720D,BnaA09g03600D,BnaA05g32130D,BnaC06g39970D,BnaA05g30980D,BnaC02g39630D,BnaC02g39600D,BnaA10g09580D,BnaC05g45460D,BnaC09g02990D
GO:0009072	aromatic amino acid family metabolic process	biological_process	13	39262	0.0108079	0.0202835	1.28305	BnaA02g26370D,BnaA06g34160D,BnaA09g19060D,BnaC05g49430D,BnaC05g04530D,BnaC06g41900D,BnaC08g44820D,BnaA10g04310D,BnaA09g49870D,BnaC07g21740D,BnaC09g20710D,BnaC09g17010D,BnaA06g38260D
GO:0010038	response to metal ion	biological_process	13	39262	0.0108079	0.0202835	1.28305	BnaC08g43630D,BnaA06g36340D,BnaA05g09920D,BnaC09g17830D,BnaCnng05330D,BnaA09g16890D,BnaA09g50750D,BnaC09g17840D,BnaA02g22480D,BnaA09g16870D,BnaCnng27040D,BnaC09g17850D,BnaC02g30770D
GO:0000902	cell morphogenesis	biological_process	13	39262	0.052622	0.0854848	1.19751	BnaA07g17530D,BnaA03g54410D,BnaC01g03880D,BnaA08g11150D,BnaC04g23940D,BnaA05g02700D,BnaC03g66050D,BnaC06g16180D,BnaA04g27540D,BnaC08g28880D,BnaA01g02640D,BnaC04g02540D,BnaA09g37130D
GO:0006081	cellular aldehyde metabolic process	biological_process	13	39262	0.266994	0.356916	1.05663	BnaA01g02880D,BnaC08g05150D,BnaCnng49760D,BnaC03g61970D,BnaA01g01360D,BnaA08g15200D,BnaC01g04140D,BnaC01g02370D,BnaC07g46060D,BnaA07g05850D,BnaA03g59170D,BnaA08g04430D,BnaC05g25340D
GO:0016559	peroxisome fission	biological_process	13	39262	0.266994	0.356916	1.05663	BnaC05g25550D,BnaA05g17730D,BnaCnng08920D,BnaC03g25430D,BnaA04g26380D,BnaCnng15230D,BnaC04g04450D,BnaA08g03650D,BnaA03g56960D,BnaC03g69990D,BnaC04g50420D,BnaA07g18900D,BnaCnng13410D
GO:0006725	cellular aromatic compound metabolic process	biological_process	13	39262	0.566141	0.666213	0.945403	BnaC06g11450D,BnaC08g10100D,BnaA08g10750D,BnaAnng27720D,BnaCnng25300D,BnaC01g27350D,BnaA08g05620D,BnaC06g11460D,BnaC01g15900D,BnaC08g10030D,BnaCnng45580D,BnaAnng27710D,BnaA09g22360D
GO:0009415	response to water	biological_process	13	39262	0.87437	0.949667	0.816485	BnaA07g32420D,BnaA07g21490D,BnaA07g11450D,BnaA02g36030D,BnaC07g15380D,BnaC02g45160D,BnaC05g15780D,BnaC09g08130D,BnaA09g07980D,BnaCnng20790D,BnaCnng27850D,BnaAnng29030D,BnaC06g36880D
GO:0035434	copper ion transmembrane transport	biological_process	13	39262	0.924815	0.987113	0.780985	BnaA02g07170D,BnaA10g12280D,BnaC06g01530D,BnaC09g34470D,BnaC04g07580D,BnaC09g37220D,BnaA02g05020D,BnaA06g17790D,BnaC02g10130D,BnaA05g06720D,BnaA10g14850D,BnaCnng25960D,BnaC01g24930D
GO:0006665	sphingolipid metabolic process	biological_process	12	39262	0	0	1.38174	BnaC03g27520D,BnaC07g32480D,BnaC07g07920D,BnaC01g30560D,BnaC02g29350D,BnaA02g23500D,BnaA09g23550D,BnaA03g57960D,BnaA01g23710D,BnaC06g07690D,BnaA03g23280D,BnaA07g06340D
GO:0007031	peroxisome organization	biological_process	12	39262	0	0	1.38174	BnaA09g40210D,BnaC08g32960D,BnaA01g26950D,BnaAnng11100D,BnaA10g22990D,BnaCnng39220D,BnaC01g34440D,BnaC03g40420D,BnaCnng64690D,BnaA06g03610D,BnaAnng35490D,BnaA09g40520D
GO:0034314	Arp2/3 complex-mediated actin nucleation	biological_process	12	39262	0	0	1.38174	BnaA09g14200D,BnaC03g56850D,BnaA09g01850D,BnaA06g07560D,BnaC07g49030D,BnaC04g29040D,BnaC09g14740D,BnaA04g06240D,BnaC05g09010D,BnaA06g32490D,BnaA08g24380D,BnaC09g01290D
GO:0006741	NADP biosynthetic process	biological_process	12	39262	0.014935	0.0271907	1.27546	BnaC01g32300D,BnaA03g36020D,BnaA02g18940D,BnaA07g34240D,BnaAnng17540D,BnaC05g16930D,BnaC03g41860D,BnaA01g25380D,BnaC02g25050D,BnaC06g39010D,BnaC05g31250D,BnaA06g15350D
GO:0007076	mitotic chromosome condensation	biological_process	12	39262	0.014935	0.0271907	1.27546	BnaC04g30270D,BnaC07g33300D,BnaCnng65470D,BnaC04g24560D,BnaCnng15200D,BnaA04g03020D,BnaA09g36400D,BnaA06g17360D,BnaC08g27990D,BnaA03g42240D,BnaC03g74950D,BnaA06g21840D
GO:0015937	coenzyme A biosynthetic process	biological_process	12	39262	0.014935	0.0271907	1.27546	BnaA09g14200D,BnaA03g22370D,BnaC01g06290D,BnaC04g47550D,BnaC05g34630D,BnaA04g20900D,BnaC09g14740D,BnaA01g04760D,BnaA08g30620D,BnaA01g22340D,BnaC03g47110D,BnaA07g13280D
GO:0019674	NAD metabolic process	biological_process	12	39262	0.014935	0.0271907	1.27546	BnaC01g32300D,BnaA03g36020D,BnaA02g18940D,BnaA07g34240D,BnaAnng17540D,BnaC05g16930D,BnaC03g41860D,BnaA01g25380D,BnaC02g25050D,BnaC06g39010D,BnaC05g31250D,BnaA06g15350D
GO:0045040	protein import into mitochondrial outer membrane	biological_process	12	39262	0.014935	0.0271907	1.27546	BnaA07g08810D,BnaCnng43990D,BnaC04g33830D,BnaA02g28590D,BnaA04g11870D,BnaC02g36640D,BnaA08g19020D,BnaUnng00170D,BnaA09g27920D,BnaC03g57640D,BnaC07g11430D,BnaC05g21320D
GO:0051013	microtubule severing	biological_process	12	39262	0.014935	0.0271907	1.27546	BnaA09g47720D,BnaC07g30810D,BnaC02g07280D,BnaC08g42170D,BnaA02g03560D,BnaA01g35940D,BnaC03g03550D,BnaC01g29290D,BnaA07g32880D,BnaCnng04090D,BnaA06g26170D,BnaA03g55700D
GO:0006308	DNA catabolic process	biological_process	12	39262	0.0685885	0.107904	1.18435	BnaA01g11450D,BnaC01g12910D,BnaC03g77020D,BnaA07g26950D,BnaCnng63000D,BnaA01g11460D,BnaA09g47700D,BnaC06g29430D,BnaA08g09680D,BnaC01g12900D,BnaC03g64080D,BnaA08g25410D
GO:0009813	flavonoid biosynthetic process	biological_process	12	39262	0.0685885	0.107904	1.18435	BnaA10g25120D,BnaC07g45760D,BnaC08g26010D,BnaC06g06390D,BnaA06g00880D,BnaCnng45660D,BnaC09g50050D,BnaC04g20870D,BnaC08g26020D,BnaA04g00080D,BnaA07g37900D,BnaA09g34840D
GO:0005978	glycogen biosynthetic process	biological_process	12	39262	0.474223	0.569068	0.975348	BnaA07g04740D,BnaA06g30310D,BnaA06g40730D,BnaA10g03820D,BnaC04g33380D,BnaC05g03730D,BnaCnng00430D,BnaA04g12270D,BnaCnng59960D,BnaA09g27810D,BnaC05g21440D,BnaC07g47330D
GO:0006421	asparaginyl-tRNA aminoacylation	biological_process	12	39262	0.474223	0.569068	0.975348	BnaC09g33230D,BnaC03g35250D,BnaC05g44530D,BnaA03g30000D,BnaCnng18830D,BnaA10g10830D,BnaC03g13340D,BnaC01g21050D,BnaA01g17760D,BnaA03g10650D,BnaA05g30200D,BnaA08g30290D
GO:0009097	isoleucine biosynthetic process	biological_process	12	39262	0.474223	0.569068	0.975348	BnaAnng16560D,BnaC05g42980D,BnaC08g16430D,BnaC08g24730D,BnaA03g30400D,BnaC03g35770D,BnaA01g32000D,BnaC06g15510D,BnaA06g09610D,BnaC05g49480D,BnaA08g31400D,BnaC01g38880D
GO:0009584	detection of visible light	biological_process	11	39262	0	0	1.38174	BnaC03g39830D,BnaCnng19880D,BnaC06g11890D,BnaA05g22950D,BnaC08g42660D,BnaA09g48410D,BnaA01g08940D,BnaC01g40810D,BnaA06g05470D,BnaC05g36390D,BnaA05g12750D
GO:0015780	nucleotide-sugar transport	biological_process	11	39262	0	0	1.38174	BnaA01g02070D,BnaC07g45560D,BnaA09g07070D,BnaA03g53270D,BnaA04g24910D,BnaC03g49310D,BnaC01g03220D,BnaUnng00460D,BnaA04g11360D,BnaA08g15010D,BnaC03g62270D
GO:0015969	guanosine tetraphosphate metabolic process	biological_process	11	39262	0	0	1.38174	BnaC03g40030D,BnaA05g25410D,BnaA02g20510D,BnaCnng23270D,BnaA09g00700D,BnaA06g01300D,BnaA03g34540D,BnaC05g52020D,BnaC06g10560D,BnaC06g06920D,BnaC02g28100D
GO:0018298	protein-chromophore linkage	biological_process	11	39262	0	0	1.38174	BnaC03g39830D,BnaCnng19880D,BnaC06g11890D,BnaA05g22950D,BnaC08g42660D,BnaA09g48410D,BnaA01g08940D,BnaC01g40810D,BnaA06g05470D,BnaC05g36390D,BnaA05g12750D
GO:0046417	chorismate metabolic process	biological_process	11	39262	0	0	1.38174	BnaC06g43480D,BnaA09g02570D,BnaC06g30540D,BnaA07g24300D,BnaC07g25660D,BnaA02g00750D,BnaA06g30990D,BnaCnng69960D,BnaC02g00030D,BnaA07g27910D,BnaC09g02030D
GO:0000724	double-strand break repair via homologous recombination	biological_process	11	39262	0.0206381	0.0362638	1.2666	BnaA05g13130D,BnaC05g38470D,BnaA05g24440D,BnaA03g05760D,BnaC02g01490D,BnaC03g07480D,BnaC03g00130D,BnaAnng06390D,BnaA03g40230D,BnaC07g49890D,BnaC06g42060D
GO:0006635	fatty acid beta-oxidation	biological_process	11	39262	0.0206381	0.0362638	1.2666	BnaC03g49190D,BnaC05g04350D,BnaC09g06780D,BnaA10g28090D,BnaA10g28060D,BnaCnng35000D,BnaA09g07080D,BnaC05g04370D,BnaA06g24040D,BnaA03g16270D,BnaA01g18160D
GO:0009306	protein secretion	biological_process	11	39262	0.0206381	0.0362638	1.2666	BnaA01g18890D,BnaA03g12600D,BnaA02g10870D,BnaAnng24940D,BnaC02g15090D,BnaA02g10850D,BnaA06g29260D,BnaC09g02780D,BnaC07g27450D,BnaC03g15470D,BnaA09g03480D
GO:0046168	glycerol-3-phosphate catabolic process	biological_process	11	39262	0.0206381	0.0362638	1.2666	BnaA05g29950D,BnaA03g19520D,BnaA04g23450D,BnaC05g44270D,BnaC04g01960D,BnaC06g42250D,BnaA05g02270D,BnaC04g32730D,BnaC04g47330D,BnaC03g23410D,BnaA07g15060D
GO:0046474	glycerophospholipid biosynthetic process	biological_process	11	39262	0.0206381	0.0362638	1.2666	BnaC09g25860D,BnaA07g12860D,BnaA07g29470D,BnaC06g32670D,BnaA07g31430D,BnaA09g23320D,BnaA09g22870D,BnaC04g17290D,BnaC06g35230D,BnaA09g23300D,BnaC06g07990D
GO:0046938	phytochelatin biosynthetic process	biological_process	11	39262	0.0206381	0.0362638	1.2666	BnaC08g43630D,BnaA06g36340D,BnaC09g17830D,BnaA09g16890D,BnaA09g50750D,BnaC09g17840D,BnaA02g22480D,BnaA09g16870D,BnaCnng27040D,BnaC09g17850D,BnaC02g30770D
GO:0006529	asparagine biosynthetic process	biological_process	11	39262	0.0890752	0.135718	1.16917	BnaA06g17510D,BnaC03g49300D,BnaC09g12810D,BnaA06g23950D,BnaC03g53730D,BnaA09g12410D,BnaC07g22450D,BnaA03g02840D,BnaCnng72260D,BnaC03g04190D,BnaA06g39840D
GO:0008380	RNA splicing	biological_process	11	39262	0.0890752	0.135718	1.16917	BnaC04g21170D,BnaC08g32520D,BnaA08g27340D,BnaA04g23970D,BnaC04g01920D,BnaA04g00350D,BnaA05g02230D,BnaC08g45770D,BnaC04g47730D,BnaC06g18620D,BnaA09g50970D
GO:0009767	photosynthetic electron transport chain	biological_process	11	39262	0.0890752	0.135718	1.16917	BnaC01g21750D,BnaCnng20740D,BnaC05g32120D,BnaC03g60960D,BnaC09g27520D,BnaC04g24900D,BnaC04g29390D,BnaC05g32130D,BnaA06g19420D,BnaC04g29450D,BnaA06g19430D
GO:0071722	detoxification of arsenic-containing substance	biological_process	11	39262	0.0890752	0.135718	1.16917	BnaA02g06130D,BnaA03g31830D,BnaC05g42770D,BnaCnng08950D,BnaA05g28460D,BnaA01g31840D,BnaC04g30920D,BnaC01g38670D,BnaA08g19550D,BnaC01g20420D,BnaCnng29600D
GO:0006559	L-phenylalanine catabolic process	biological_process	11	39262	0.211996	0.290192	1.08566	BnaA04g21230D,BnaC05g42780D,BnaCnng52250D,BnaA09g33560D,BnaA04g04830D,BnaC08g24360D,BnaA05g28470D,BnaC02g13840D,BnaA02g09890D,BnaA07g16060D,BnaA04g11940D
GO:0005986	sucrose biosynthetic process	biological_process	11	39262	0.370496	0.46998	1.01328	BnaA04g04190D,BnaC04g44820D,BnaA09g34190D,BnaA03g16340D,BnaC03g19650D,BnaC08g25100D,BnaA04g20850D,BnaCnng46880D,BnaA05g15220D,BnaC06g08810D,BnaC03g68760D
GO:0009432	SOS response	biological_process	11	39262	0.370496	0.46998	1.01328	BnaAnng27110D,BnaC06g20150D,BnaC08g36690D,BnaC06g43010D,BnaC03g35730D,BnaC07g01720D,BnaA09g44130D,BnaA03g30390D,BnaA07g35950D,BnaC02g25430D,BnaA07g20500D
GO:0008612	peptidyl-lysine modification to peptidyl-hypusine	biological_process	11	39262	0.53472	0.630616	0.949948	BnaCnng74170D,BnaC07g12330D,BnaA07g09420D,BnaAnng01530D,BnaC09g49490D,BnaA09g29060D,BnaA08g19830D,BnaA07g27940D,BnaA10g24600D,BnaC05g20200D,BnaC03g57360D
GO:0006378	mRNA polyadenylation	biological_process	11	39262	0.679912	0.778395	0.894069	BnaC07g30520D,BnaA03g47500D,BnaC01g08640D,BnaA01g14790D,BnaA06g26440D,BnaA01g07160D,BnaC07g39750D,BnaC08g47260D,BnaC07g08330D,BnaC01g17430D,BnaA08g30980D
GO:0006433	prolyl-tRNA aminoacylation	biological_process	11	39262	0.793564	0.878531	0.844399	BnaC06g18340D,BnaC04g31570D,BnaA07g19180D,BnaC08g32040D,BnaA09g39700D,BnaA02g10820D,BnaC02g15040D,BnaC09g28510D,BnaC04g31520D,BnaC04g31590D,BnaAnng24040D
GO:0048015	phosphatidylinositol-mediated signaling	biological_process	11	39262	0.793564	0.878531	0.844399	BnaA05g16200D,BnaA06g23220D,BnaC03g50140D,BnaC02g42900D,BnaC09g14690D,BnaC06g02580D,BnaA06g03180D,BnaCnng66380D,BnaCnng44230D,BnaA02g34040D,BnaA09g14140D
GO:0006090	pyruvate metabolic process	biological_process	10	39262	0	0	1.38174	BnaCnng27780D,BnaA05g25500D,BnaC06g07040D,BnaA06g00560D,BnaC03g38230D,BnaCnng28440D,BnaC07g33060D,BnaA03g41960D,BnaA03g33170D,BnaA01g18450D
GO:0006419	alanyl-tRNA aminoacylation	biological_process	10	39262	0	0	1.38174	BnaA05g15950D,BnaA02g05940D,BnaC05g50520D,BnaA08g02200D,BnaUnng00940D,BnaA05g23270D,BnaC06g03380D,BnaC02g45400D,BnaC05g36690D,BnaA06g02930D
GO:0006426	glycyl-tRNA aminoacylation	biological_process	10	39262	0	0	1.38174	BnaC06g22570D,BnaA07g07590D,BnaC06g22580D,BnaC07g09420D,BnaA07g21850D,BnaAnng37550D,BnaA09g26600D,BnaC06g22590D,BnaC06g22560D,BnaC05g22820D
GO:0006432	phenylalanyl-tRNA aminoacylation	biological_process	10	39262	0	0	1.38174	BnaC04g33290D,BnaA07g17620D,BnaA09g37290D,BnaC09g41850D,BnaA09g42950D,BnaC08g29030D,BnaC06g16310D,BnaA04g12390D,BnaC08g49240D,BnaA10g18320D
GO:0006446	regulation of translational initiation	biological_process	10	39262	0	0	1.38174	BnaC07g44180D,BnaC01g04940D,BnaA03g56950D,BnaA03g52440D,BnaC04g50410D,BnaA08g11850D,BnaA01g03600D,BnaC03g66710D,BnaC03g25420D,BnaA04g26370D
GO:0006680	glucosylceramide catabolic process	biological_process	10	39262	0	0	1.38174	BnaC03g27520D,BnaC07g07920D,BnaC01g30560D,BnaC02g29350D,BnaA02g23500D,BnaA09g23550D,BnaA01g23710D,BnaC06g07690D,BnaA03g23280D,BnaA07g06340D
GO:0009088	threonine biosynthetic process	biological_process	10	39262	0	0	1.38174	BnaA08g13300D,BnaC03g68250D,BnaC08g16430D,BnaC02g21550D,BnaC01g08620D,BnaA01g07140D,BnaA06g09610D,BnaC05g49480D,BnaA02g16170D,BnaA08g31400D
GO:0009250	glucan biosynthetic process	biological_process	10	39262	0	0	1.38174	BnaC08g15040D,BnaA08g08660D,BnaCnng18120D,BnaC08g11320D,BnaC07g30160D,BnaA06g26820D,BnaC05g48670D,BnaA05g34030D,BnaA06g07310D,BnaA08g25180D
GO:0016075	rRNA catabolic process	biological_process	10	39262	0	0	1.38174	BnaA10g00800D,BnaC05g00860D,BnaC01g01410D,BnaC05g31650D,BnaA09g28140D,BnaC09g37430D,BnaA01g00420D,BnaC05g21090D,BnaA10g15080D,BnaA05g36100D
GO:0051252	regulation of RNA metabolic process	biological_process	10	39262	0	0	1.38174	BnaA03g28100D,BnaA02g08790D,BnaC02g12370D,BnaAnng29540D,BnaC03g13740D,BnaA03g10990D,BnaC03g33130D,BnaC03g07780D,BnaAnng12730D,BnaA03g06030D
GO:0006188	IMP biosynthetic process	biological_process	10	39262	0.0285188	0.0489404	1.25613	BnaC07g35310D,BnaC01g40920D,BnaC04g56640D,BnaA01g09220D,BnaC04g07110D,BnaC03g76830D,BnaA08g08790D,BnaA05g06460D,BnaA04g21890D,BnaA03g58310D
GO:0006222	UMP biosynthetic process	biological_process	10	39262	0.0285188	0.0489404	1.25613	BnaA01g27800D,BnaA06g26030D,BnaA09g05380D,BnaC02g42200D,BnaC01g34640D,BnaC09g04920D,BnaA05g22440D,BnaC03g40220D,BnaC05g35700D,BnaC08g23300D
GO:0006430	lysyl-tRNA aminoacylation	biological_process	10	39262	0.0285188	0.0489404	1.25613	BnaC05g39850D,BnaA05g27370D,BnaAnng09530D,BnaA10g30390D,BnaC05g41490D,BnaA03g31900D,BnaC03g73420D,BnaA03g32860D,BnaAnng09520D,BnaA05g25810D
GO:0006826	iron ion transport	biological_process	10	39262	0.0285188	0.0489404	1.25613	BnaA09g35560D,BnaA05g27910D,BnaC06g15730D,BnaC05g42110D,BnaC04g48390D,BnaA07g16710D,BnaC03g00160D,BnaA09g35550D,BnaA03g00260D,BnaC08g27000D
GO:0006879	cellular iron ion homeostasis	biological_process	10	39262	0.0285188	0.0489404	1.25613	BnaA09g35560D,BnaA05g27910D,BnaC06g15730D,BnaC05g42110D,BnaC04g48390D,BnaA07g16710D,BnaC03g00160D,BnaA09g35550D,BnaA03g00260D,BnaC08g27000D
GO:0006102	isocitrate metabolic process	biological_process	10	39262	0.115206	0.169968	1.15145	BnaC06g27300D,BnaA07g25510D,BnaAnng25840D,BnaA07g17800D,BnaC02g24620D,BnaCnng36970D,BnaA03g04970D,BnaC03g06570D,BnaAnng25850D,BnaA02g12320D
GO:0019464	glycine decarboxylation via glycine cleavage system	biological_process	10	39262	0.115206	0.169968	1.15145	BnaA09g24310D,BnaC05g24600D,BnaA03g16100D,BnaC05g28570D,BnaC03g19300D,BnaC04g10230D,BnaA05g08820D,BnaA05g18150D,BnaAnng37640D,BnaC08g07440D
GO:0016575	histone deacetylation	biological_process	10	39262	0.258927	0.348058	1.06288	BnaA06g22530D,BnaCnng15690D,BnaC01g40000D,BnaCnng09360D,BnaA01g33500D,BnaC03g51150D,BnaA06g18770D,BnaA06g16760D,BnaC03g54980D,BnaA09g06460D
GO:0042773	ATP synthesis coupled electron transport	biological_process	10	39262	0.905114	0.971284	0.767635	BnaC02g35570D,BnaC09g29190D,BnaCnng12800D,BnaC09g26850D,BnaC04g55940D,BnaCnng12880D,BnaC01g26940D,BnaC09g16410D,BnaCnng13120D,BnaA04g08090D
GO:0045017	glycerolipid biosynthetic process	biological_process	10	39262	1	1	0.383818	BnaA06g16100D,BnaC02g04350D,BnaA02g01260D,BnaC02g32190D,BnaA05g12980D,BnaC03g52610D,BnaC01g25960D,BnaA10g06730D,BnaC06g12160D,BnaA06g39110D
GO:0000723	telomere maintenance	biological_process	9	39262	0	0	1.38174	BnaC05g13070D,BnaC03g53260D,BnaA10g30300D,BnaA06g11440D,BnaC09g49230D,BnaA08g29690D,BnaC09g17650D,BnaA09g16760D,BnaC08g03910D
GO:0006166	purine ribonucleoside salvage	biological_process	9	39262	0	0	1.38174	BnaA01g32050D,BnaC02g03230D,BnaC06g32720D,BnaA07g29530D,BnaCnng02900D,BnaA03g00830D,BnaC01g38960D,BnaC03g01140D,BnaA10g26640D
GO:0006788	heme oxidation	biological_process	9	39262	0	0	1.38174	BnaA09g27040D,BnaC06g17920D,BnaC07g16850D,BnaA07g12810D,BnaC06g27630D,BnaA09g14830D,BnaCnng72350D,BnaC05g24860D,BnaA09g24220D
GO:0006839	mitochondrial transport	biological_process	9	39262	0	0	1.38174	BnaA02g07340D,BnaC06g42530D,BnaA07g16280D,BnaA04g04340D,BnaA10g29330D,BnaC09g34250D,BnaC08g24950D,BnaA09g34030D,BnaC02g10400D
GO:0006974	cellular response to DNA damage stimulus	biological_process	9	39262	0	0	1.38174	BnaCnng50230D,BnaA07g15840D,BnaC03g53260D,BnaCnng05970D,BnaA04g05140D,BnaC08g41380D,BnaA09g47280D,BnaA05g33320D,BnaC06g14230D
GO:0010508	positive regulation of autophagy	biological_process	9	39262	0	0	1.38174	BnaA07g33780D,BnaA04g19030D,BnaA03g15080D,BnaC04g43330D,BnaC09g25320D,BnaC06g38410D,BnaC03g18100D,BnaAnng04410D,BnaC06g38420D
GO:0016558	protein import into peroxisome matrix	biological_process	9	39262	0	0	1.38174	BnaC03g51450D,BnaA09g40210D,BnaC08g32960D,BnaA09g06240D,BnaA09g34620D,BnaA06g22290D,BnaC09g50920D,BnaAnng35490D,BnaA09g40520D
GO:0017006	protein-tetrapyrrole linkage	biological_process	9	39262	0	0	1.38174	BnaC03g39830D,BnaCnng19880D,BnaC06g11890D,BnaA05g22950D,BnaC08g42660D,BnaA09g48410D,BnaC01g40810D,BnaC05g36390D,BnaA05g12750D
GO:0030071	regulation of mitotic metaphase/anaphase transition	biological_process	9	39262	0	0	1.38174	BnaAnng14950D,BnaA06g16860D,BnaA01g11370D,BnaC01g12830D,BnaC06g01420D,BnaCnng12060D,BnaCnng69880D,BnaA06g25330D,BnaAnng14940D
GO:0006891	intra-Golgi vesicle-mediated transport	biological_process	9	39262	0.0394084	0.0657074	1.24357	BnaC06g29100D,BnaA07g26710D,BnaA09g25150D,BnaA09g24960D,BnaA01g26730D,BnaC01g34130D,BnaA05g21680D,BnaC05g34730D,BnaC06g26230D
GO:0018279	protein N-linked glycosylation via asparagine	biological_process	9	39262	0.0394084	0.0657074	1.24357	BnaC03g64370D,BnaA09g07760D,BnaA03g58520D,BnaC07g36590D,BnaA01g11060D,BnaC09g07890D,BnaA07g12390D,BnaC07g16630D,BnaC01g12560D
GO:0019430	removal of superoxide radicals	biological_process	9	39262	0.0394084	0.0657074	1.24357	BnaA03g19550D,BnaC07g45590D,BnaA08g14980D,BnaA09g09110D,BnaA03g53300D,BnaC09g09340D,BnaA05g02330D,BnaC03g23440D,BnaC04g02020D
GO:0044249	cellular biosynthetic process	biological_process	9	39262	0.0394084	0.0657074	1.24357	BnaA07g04420D,BnaC05g28770D,BnaA05g08630D,BnaCnng67980D,BnaC04g49680D,BnaC05g24530D,BnaC04g09710D,BnaA04g25770D,BnaA09g24370D
GO:0042549	photosystem II stabilization	biological_process	9	39262	0.148305	0.212937	1.13052	BnaC09g07990D,BnaA01g19750D,BnaC07g16640D,BnaC08g22200D,BnaC01g23800D,BnaA02g34760D,BnaA09g07840D,BnaA07g12480D,BnaC02g48890D
GO:0019310	inositol catabolic process	biological_process	9	39262	0.313798	0.40398	1.03631	BnaA01g23900D,BnaC07g01430D,BnaC05g49660D,BnaA03g47910D,BnaA09g10050D,BnaC09g10140D,BnaAnng22250D,BnaC07g40160D,BnaA07g00980D
GO:0031120	snRNA pseudouridine synthesis	biological_process	9	39262	0.313798	0.40398	1.03631	BnaA03g06930D,BnaA01g33870D,BnaC01g40380D,BnaCnng43190D,BnaC02g48350D,BnaC03g08830D,BnaC02g07930D,BnaA10g01980D,BnaA02g04000D
GO:0031123	RNA 3'-end processing	biological_process	9	39262	0.313798	0.40398	1.03631	BnaA01g04100D,BnaA05g30810D,BnaC08g37460D,BnaA04g15160D,BnaA09g44760D,BnaC08g17680D,BnaC04g38120D,BnaC01g05560D,BnaA08g22830D
GO:0006452	translational frameshifting	biological_process	9	39262	0.496701	0.591293	0.956591	BnaCnng74170D,BnaC07g12330D,BnaA07g09420D,BnaA09g29060D,BnaA08g19830D,BnaC07g21160D,BnaA07g27940D,BnaC05g20200D,BnaC03g57360D
GO:0007585	respiratory gaseous exchange	biological_process	9	39262	0.496701	0.591293	0.956591	BnaC01g13770D,BnaA03g36620D,BnaCnng63430D,BnaC09g06270D,BnaC05g30210D,BnaA05g17260D,BnaCnng60000D,BnaA05g35970D,BnaA01g12080D
GO:0009269	response to desiccation	biological_process	9	39262	0.496701	0.591293	0.956591	BnaA03g20620D,BnaAnng17910D,BnaC04g00870D,BnaC04g49420D,BnaC04g50740D,BnaCnng31340D,BnaA04g25530D,BnaC03g24650D,BnaA06g39030D
GO:0018342	protein prenylation	biological_process	9	39262	0.496701	0.591293	0.956591	BnaC01g41870D,BnaC07g38940D,BnaAnng10040D,BnaA01g18430D,BnaA09g17110D,BnaA03g46740D,BnaC01g41500D,BnaC07g17910D,BnaAnng40160D
GO:0045901	positive regulation of translational elongation	biological_process	9	39262	0.496701	0.591293	0.956591	BnaCnng74170D,BnaC07g12330D,BnaA07g09420D,BnaA09g29060D,BnaA08g19830D,BnaC07g21160D,BnaA07g27940D,BnaC05g20200D,BnaC03g57360D
GO:0045905	positive regulation of translational termination	biological_process	9	39262	0.496701	0.591293	0.956591	BnaCnng74170D,BnaC07g12330D,BnaA07g09420D,BnaA09g29060D,BnaA08g19830D,BnaC07g21160D,BnaA07g27940D,BnaC05g20200D,BnaC03g57360D
GO:0006436	tryptophanyl-tRNA aminoacylation	biological_process	9	39262	0.660935	0.759845	0.888263	BnaC04g38130D,BnaA03g28620D,BnaC03g73230D,BnaC03g33750D,BnaA01g33520D,BnaA03g12530D,BnaA04g15180D,BnaC03g15410D,BnaC01g40020D
GO:0006438	valyl-tRNA aminoacylation	biological_process	9	39262	0.787982	0.875433	0.829046	BnaA09g56940D,BnaA10g17760D,BnaC03g75900D,BnaC03g75530D,BnaC09g41130D,BnaC08g39450D,BnaC05g10820D,BnaA06g09440D,BnaCnng71990D
GO:0043631	RNA polyadenylation	biological_process	9	39262	0.875727	0.949667	0.777231	BnaA01g04100D,BnaA05g30810D,BnaC08g37460D,BnaA04g15160D,BnaA09g44760D,BnaC08g17680D,BnaC04g38120D,BnaC01g05560D,BnaA08g22830D
GO:0006515	misfolded or incompletely synthesized protein catabolic process	biological_process	9	39262	0.999627	1	0.518154	BnaA06g28390D,BnaC07g19860D,BnaA06g35630D,BnaA02g31450D,BnaC05g12420D,BnaC07g28450D,BnaC02g48360D,BnaA06g28380D,BnaC07g28460D
GO:0000917	barrier septum assembly	biological_process	8	39262	0	0	1.38174	BnaC09g45110D,BnaC09g33840D,BnaA10g11950D,BnaC03g04790D,BnaA03g03360D,BnaA04g13340D,BnaA10g21010D,BnaC04g35430D
GO:0006231	dTMP biosynthetic process	biological_process	8	39262	0	0	1.38174	BnaA03g39030D,BnaA03g52900D,BnaC03g27330D,BnaC03g46190D,BnaA03g23120D,BnaC01g03830D,BnaC07g45090D,BnaA01g02590D
GO:0006428	isoleucyl-tRNA aminoacylation	biological_process	8	39262	0	0	1.38174	BnaUnng00270D,BnaC06g41300D,BnaC02g38910D,BnaC07g27010D,BnaA02g30540D,BnaA06g29730D,BnaA04g11450D,BnaC07g37200D
GO:0006625	protein targeting to peroxisome	biological_process	8	39262	0	0	1.38174	BnaA03g28570D,BnaA10g22990D,BnaCnng39220D,BnaC05g47260D,BnaC01g18550D,BnaC07g04030D,BnaC03g33710D,BnaA05g33000D
GO:0007034	vacuolar transport	biological_process	8	39262	0	0	1.38174	BnaC01g20340D,BnaA02g10230D,BnaC01g44450D,BnaA06g03740D,BnaCnng76240D,BnaC02g14200D,BnaA10g06820D,BnaAnng13820D
GO:0019419	sulfate reduction	biological_process	8	39262	0	0	1.38174	BnaC09g22760D,BnaC01g13420D,BnaA09g20370D,BnaA01g11840D,BnaA03g45080D,BnaC04g19270D,BnaA03g59800D,BnaC07g37060D
GO:0042823	pyridoxal phosphate biosynthetic process	biological_process	8	39262	0	0	1.38174	BnaA04g21870D,BnaC01g44250D,BnaAnng00210D,BnaC03g00280D,BnaA03g00380D,BnaC04g45760D,BnaC08g47410D,BnaA01g28260D
GO:0051260	protein homooligomerization	biological_process	8	39262	0	0	1.38174	BnaA04g11080D,BnaC08g34080D,BnaCnng33980D,BnaA09g41490D,BnaA03g11640D,BnaCnng24220D,BnaC03g71640D,BnaA05g29300D
GO:0051301	cell division	biological_process	8	39262	0	0	1.38174	BnaA03g03080D,BnaA02g14280D,BnaC02g19160D,BnaA09g11110D,BnaA07g27930D,BnaC06g30560D,BnaC03g04500D,BnaC09g11420D
GO:0000245	spliceosomal complex assembly	biological_process	8	39262	0.0544558	0.0874271	1.22822	BnaA09g00770D,BnaC05g47580D,BnaC01g40330D,BnaA05g37300D,BnaA05g34320D,BnaCnng19200D,BnaA01g33830D,BnaC04g02340D
GO:0006527	arginine catabolic process	biological_process	8	39262	0.0544558	0.0874271	1.22822	BnaA08g10990D,BnaA01g02450D,BnaC03g65810D,BnaA03g53010D,BnaC01g03710D,BnaA01g02460D,BnaC01g03720D,BnaC07g45200D
GO:0009228	thiamine biosynthetic process	biological_process	8	39262	0.0544558	0.0874271	1.22822	BnaA04g21870D,BnaA09g30250D,BnaC07g07260D,BnaA07g05920D,BnaC04g54380D,BnaC08g00140D,BnaA08g27360D,BnaC05g18230D
GO:0006013	mannose metabolic process	biological_process	8	39262	0.189882	0.263877	1.10539	BnaC07g23810D,BnaC02g05850D,BnaC03g06150D,BnaA02g02390D,BnaA06g32690D,BnaA03g04620D,BnaC03g06690D,BnaA03g05140D
GO:0006021	inositol biosynthetic process	biological_process	8	39262	0.189882	0.263877	1.10539	BnaA04g12720D,BnaA02g00400D,BnaC02g00460D,BnaC04g34650D,BnaA01g34710D,BnaC01g00680D,BnaA09g42760D,BnaC08g35240D
GO:0006370	7-methylguanosine mRNA capping	biological_process	8	39262	0.189882	0.263877	1.10539	BnaC05g32210D,BnaC03g00320D,BnaCnng24280D,BnaCnng10740D,BnaA05g29240D,BnaA05g20260D,BnaA01g25610D,BnaA03g00430D
GO:0006402	mRNA catabolic process	biological_process	8	39262	0.189882	0.263877	1.10539	BnaC05g48080D,BnaA10g19220D,BnaA03g04960D,BnaC09g42910D,BnaC03g06560D,BnaC03g33500D,BnaA05g32780D,BnaA03g28360D
GO:0019725	cellular homeostasis	biological_process	8	39262	0.189882	0.263877	1.10539	BnaC09g03210D,BnaC02g39760D,BnaA02g31190D,BnaA06g28690D,BnaA09g52280D,BnaC04g20880D,BnaC07g28050D,BnaA04g00100D
GO:0022904	respiratory electron transport chain	biological_process	8	39262	0.189882	0.263877	1.10539	BnaCnng20740D,BnaA02g10640D,BnaCnng12720D,BnaC09g28890D,BnaC02g14930D,BnaA03g12510D,BnaC03g15390D,BnaC07g05360D
GO:0006461	protein complex assembly	biological_process	8	39262	0.376979	0.471389	1.0049	BnaA02g12880D,BnaCnng13130D,BnaA04g19940D,BnaCnng44840D,BnaC04g44350D,BnaCnng12680D,BnaA05g09710D,BnaC01g15170D
GO:0009186	deoxyribonucleoside diphosphate metabolic process	biological_process	8	39262	0.566525	0.666213	0.921162	BnaC07g48980D,BnaC02g36630D,BnaA06g32440D,BnaA07g06360D,BnaA01g18560D,BnaA02g28570D,BnaC07g07940D,BnaC08g37570D
GO:0019318	hexose metabolic process	biological_process	8	39262	0.723629	0.812599	0.850303	BnaA06g17140D,BnaC01g34580D,BnaC03g57220D,BnaC05g35520D,BnaC03g32560D,BnaA03g27550D,BnaA01g27130D,BnaA05g22280D
GO:0017004	cytochrome complex assembly	biological_process	8	39262	0.836476	0.918002	0.789568	BnaCnng13130D,BnaA09g32350D,BnaC09g51310D,BnaA02g09680D,BnaC08g23120D,BnaC02g44620D,BnaCnng12680D,BnaA09g12540D
GO:0009113	purine nucleobase biosynthetic process	biological_process	8	39262	0.909218	0.974416	0.73693	BnaA07g03650D,BnaC05g07310D,BnaA08g26110D,BnaA06g05760D,BnaC01g03690D,BnaC08g13890D,BnaCnng38460D,BnaA01g02440D
GO:0000154	rRNA modification	biological_process	7	39262	0	0	1.38174	BnaCnng08920D,BnaA05g00540D,BnaA03g21780D,BnaC04g51980D,BnaA07g12730D,BnaC03g26050D,BnaCnng46850D
GO:0006163	purine nucleotide metabolic process	biological_process	7	39262	0	0	1.38174	BnaA07g17360D,BnaC05g45590D,BnaA09g36860D,BnaC08g28550D,BnaA04g02340D,BnaA05g31080D,BnaC04g55480D
GO:0006366	transcription from RNA polymerase II promoter	biological_process	7	39262	0	0	1.38174	BnaA10g01290D,BnaCnng71120D,BnaC08g11060D,BnaC05g01350D,BnaA08g27210D,BnaA01g01750D,BnaC01g02870D
GO:0006424	glutamyl-tRNA aminoacylation	biological_process	7	39262	0	0	1.38174	BnaC09g03560D,BnaC03g50160D,BnaC02g40340D,BnaA02g31710D,BnaA06g23200D,BnaA01g15800D,BnaA09g04160D
GO:0006505	GPI anchor metabolic process	biological_process	7	39262	0	0	1.38174	BnaA06g32200D,BnaC07g24190D,BnaA01g02800D,BnaAnng15970D,BnaA02g28820D,BnaC02g07380D,BnaCnng16160D
GO:0006562	proline catabolic process	biological_process	7	39262	0	0	1.38174	BnaC02g38230D,BnaAnng37880D,BnaC04g31100D,BnaC07g26120D,BnaA06g39660D,BnaAnng07910D,BnaA09g02760D
GO:0009245	lipid A biosynthetic process	biological_process	7	39262	0	0	1.38174	BnaCnng04790D,BnaC09g21840D,BnaC02g30980D,BnaCnng00710D,BnaA02g22590D,BnaA08g19230D,BnaA07g04530D
GO:0009247	glycolipid biosynthetic process	biological_process	7	39262	0	0	1.38174	BnaA03g51720D,BnaCnng51890D,BnaC01g06700D,BnaA09g08200D,BnaA08g07530D,BnaC09g08430D,BnaA01g05080D
GO:0009446	putrescine biosynthetic process	biological_process	7	39262	0	0	1.38174	BnaAnng25490D,BnaA10g23180D,BnaC09g47760D,BnaCnng71650D,BnaA10g23190D,BnaC09g47750D,BnaC05g11260D
GO:0051103	DNA ligation involved in DNA repair	biological_process	7	39262	0	0	1.38174	BnaA10g11190D,BnaC06g27700D,BnaA06g04600D,BnaC08g43360D,BnaA09g49030D,BnaC05g05790D,BnaC09g53370D
GO:0006302	double-strand break repair	biological_process	7	39262	0.0752482	0.116049	1.20903	BnaCnng53340D,BnaC09g30690D,BnaCnng41270D,BnaA01g24140D,BnaC03g00130D,BnaC06g42060D,BnaA10g07340D
GO:0006555	methionine metabolic process	biological_process	7	39262	0.0752482	0.116049	1.20903	BnaC04g03400D,BnaC06g17620D,BnaA05g03790D,BnaA04g25580D,BnaA07g18600D,BnaC08g30190D,BnaA09g38220D
GO:0006627	protein processing involved in protein targeting to mitochondrion	biological_process	7	39262	0.0752482	0.116049	1.20903	BnaA10g25390D,BnaC09g50420D,BnaC07g09330D,BnaC09g45470D,BnaA03g03210D,BnaA10g21360D,BnaA05g29340D
GO:0007155	cell adhesion	biological_process	7	39262	0.0752482	0.116049	1.20903	BnaC04g41340D,BnaA06g37090D,BnaA05g20830D,BnaC04g17860D,BnaC05g33510D,BnaA06g29440D,BnaA04g17700D
GO:0009152	purine ribonucleotide biosynthetic process	biological_process	7	39262	0.0752482	0.116049	1.20903	BnaC07g35310D,BnaC01g40920D,BnaC02g05560D,BnaA01g09220D,BnaC03g76830D,BnaA08g08790D,BnaA03g58310D
GO:0009156	ribonucleoside monophosphate biosynthetic process	biological_process	7	39262	0.0752482	0.116049	1.20903	BnaC05g28770D,BnaA05g08630D,BnaC04g49680D,BnaC05g24530D,BnaC04g09710D,BnaA04g25770D,BnaA09g24370D
GO:0015671	oxygen transport	biological_process	7	39262	0.0752482	0.116049	1.20903	BnaA05g28340D,BnaC01g05740D,BnaAnng36930D,BnaC05g42510D,BnaA01g31630D,BnaA07g03790D,BnaA01g04300D
GO:0009452	7-methylguanosine RNA capping	biological_process	7	39262	0.448407	0.550547	0.96722	BnaC08g09540D,BnaC07g08840D,BnaA10g28550D,BnaA08g05290D,BnaAnng36690D,BnaCnng25810D,BnaA07g07260D
GO:0006434	seryl-tRNA aminoacylation	biological_process	7	39262	0.638882	0.738624	0.879291	BnaC08g15130D,BnaA08g25080D,BnaC08g41780D,BnaA06g28710D,BnaC02g39740D,BnaA09g47500D,BnaA02g31180D
GO:0006066	alcohol metabolic process	biological_process	7	39262	0.999987	1	0.403008	BnaA03g12950D,BnaA09g45720D,BnaC08g39840D,BnaA07g22900D,BnaA03g12940D,BnaC06g23880D,BnaC03g15790D
GO:0006000	fructose metabolic process	biological_process	6	39262	0	0	1.38174	BnaC08g45130D,BnaC05g04910D,BnaAnng15770D,BnaA10g04550D,BnaC08g01990D,BnaA08g28830D
GO:0006086	acetyl-CoA biosynthetic process from pyruvate	biological_process	6	39262	0	0	1.38174	BnaC03g16370D,BnaC02g16000D,BnaA10g05930D,BnaC09g26770D,BnaA03g13490D,BnaA02g11520D
GO:0006545	glycine biosynthetic process	biological_process	6	39262	0	0	1.38174	BnaA03g39030D,BnaA03g52900D,BnaC03g46190D,BnaA03g23120D,BnaC01g03830D,BnaA01g02590D
GO:0006566	threonine metabolic process	biological_process	6	39262	0	0	1.38174	BnaA07g36280D,BnaA06g25900D,BnaC03g47540D,BnaA09g09000D,BnaCnng22770D,BnaC09g09260D
GO:0006637	acyl-CoA metabolic process	biological_process	6	39262	0	0	1.38174	BnaC02g27480D,BnaA02g36400D,BnaA10g00290D,BnaC05g00380D,BnaA03g27090D,BnaC03g32070D
GO:0006650	glycerophospholipid metabolic process	biological_process	6	39262	0	0	1.38174	BnaCnng35920D,BnaC05g28890D,BnaCnng43880D,BnaA05g16330D,BnaA09g24560D,BnaA08g06960D
GO:0006656	phosphatidylcholine biosynthetic process	biological_process	6	39262	0	0	1.38174	BnaA05g22260D,BnaC06g02100D,BnaC06g23520D,BnaA07g22620D,BnaA06g03670D,BnaC05g35500D
GO:0007030	Golgi organization	biological_process	6	39262	0	0	1.38174	BnaC07g39160D,BnaA01g14200D,BnaC01g16700D,BnaA03g07050D,BnaA03g46980D,BnaC03g08950D
GO:0009168	purine ribonucleoside monophosphate biosynthetic process	biological_process	6	39262	0	0	1.38174	BnaC04g56640D,BnaA09g20190D,BnaC04g07110D,BnaA05g06460D,BnaA04g21890D,BnaC09g22520D
GO:0009252	peptidoglycan biosynthetic process	biological_process	6	39262	0	0	1.38174	BnaA09g11110D,BnaA03g31040D,BnaC01g28830D,BnaC03g36380D,BnaA01g23090D,BnaC09g11420D
GO:0015940	pantothenate biosynthetic process	biological_process	6	39262	0	0	1.38174	BnaA06g29910D,BnaC06g42940D,BnaA07g38230D,BnaC08g31410D,BnaAnng40200D,BnaC07g26790D
GO:0016568	chromatin modification	biological_process	6	39262	0	0	1.38174	BnaC03g13320D,BnaA05g17500D,BnaA03g10630D,BnaC05g25590D,BnaC09g33270D,BnaA10g10870D
GO:0018160	peptidyl-pyrromethane cofactor linkage	biological_process	6	39262	0	0	1.38174	BnaA03g02420D,BnaAnng06210D,BnaA10g23080D,BnaC09g47630D,BnaC02g01240D,BnaC03g03440D
GO:0019673	GDP-mannose metabolic process	biological_process	6	39262	0	0	1.38174	BnaA03g41220D,BnaC08g22580D,BnaA01g19590D,BnaC01g23490D,BnaC07g32110D,BnaA09g31740D
GO:0031047	gene silencing by RNA	biological_process	6	39262	0	0	1.38174	BnaC02g01650D,BnaA06g21290D,BnaCnng59840D,BnaC03g03000D,BnaAnng13680D,BnaA03g02010D
GO:0038032	termination of G-protein coupled receptor signaling pathway	biological_process	6	39262	0	0	1.38174	BnaA06g33150D,BnaA01g00030D,BnaC01g00950D,BnaC07g23240D,BnaC09g21710D,BnaA09g19690D
GO:0042255	ribosome assembly	biological_process	6	39262	0	0	1.38174	BnaC08g10420D,BnaA08g05860D,BnaC01g22300D,BnaC07g33200D,BnaA01g18390D,BnaA03g42130D
GO:0042327	positive regulation of phosphorylation	biological_process	6	39262	0	0	1.38174	BnaA06g34700D,BnaC02g34100D,BnaA02g25860D,BnaA09g18760D,BnaC07g21040D,BnaC09g20820D
GO:0043043	peptide biosynthetic process	biological_process	6	39262	0	0	1.38174	BnaC05g37640D,BnaA05g29470D,BnaA10g27720D,BnaC05g43820D,BnaCnng40680D,BnaA05g23830D
GO:0048208	COPII vesicle coating	biological_process	6	39262	0	0	1.38174	BnaC09g20230D,BnaA09g18310D,BnaC07g20240D,BnaA06g39980D,BnaC09g20220D,BnaA09g18300D
GO:0050790	regulation of catalytic activity	biological_process	6	39262	0	0	1.38174	BnaCnng45130D,BnaA09g52180D,BnaCnng01440D,BnaC07g07560D,BnaAnng17870D,BnaA07g02200D
GO:0006783	heme biosynthetic process	biological_process	6	39262	0.103979	0.155542	1.18435	BnaC08g32870D,BnaC04g49670D,BnaC07g28900D,BnaA06g28020D,BnaA04g25760D,BnaA09g40430D
GO:0006897	endocytosis	biological_process	6	39262	0.103979	0.155542	1.18435	BnaC08g00390D,BnaC05g02180D,BnaA08g27640D,BnaC04g23510D,BnaA10g02260D,BnaA04g01920D
GO:0009059	macromolecule biosynthetic process	biological_process	6	39262	0.103979	0.155542	1.18435	BnaA05g24210D,BnaC06g35260D,BnaA07g31470D,BnaA05g27590D,BnaA02g16890D,BnaCnng31290D
GO:0009405	pathogenesis	biological_process	6	39262	0.103979	0.155542	1.18435	BnaC04g33470D,BnaC08g40310D,BnaC08g15920D,BnaC08g40290D,BnaA08g24260D,BnaA09g46230D
GO:0017183	peptidyl-diphthamide biosynthetic process from peptidyl-histidine	biological_process	6	39262	0.103979	0.155542	1.18435	BnaC01g06690D,BnaAnng29160D,BnaA06g21480D,BnaA01g05070D,BnaC03g52070D,BnaC08g29850D
GO:0006423	cysteinyl-tRNA aminoacylation	biological_process	6	39262	0.305093	0.396814	1.03631	BnaC04g31130D,BnaC04g13580D,BnaA04g08860D,BnaA07g14570D,BnaC06g12480D,BnaA05g11470D
GO:0006471	protein ADP-ribosylation	biological_process	6	39262	0.305093	0.396814	1.03631	BnaC04g13660D,BnaC03g30970D,BnaA02g36520D,BnaA03g26210D,BnaA05g11420D,BnaC02g27380D
GO:0019307	mannose biosynthetic process	biological_process	6	39262	0.305093	0.396814	1.03631	BnaA05g05120D,BnaA03g21160D,BnaC03g25460D,BnaC04g04500D,BnaAnng26680D,BnaC03g25450D
GO:0006435	threonyl-tRNA aminoacylation	biological_process	6	39262	0.527363	0.623282	0.921162	BnaA06g28360D,BnaC09g03450D,BnaA03g37870D,BnaC07g28480D,BnaC03g44930D,BnaA09g44660D
GO:0009298	GDP-mannose biosynthetic process	biological_process	6	39262	0.527363	0.623282	0.921162	BnaAnng24620D,BnaC05g48220D,BnaA01g32870D,BnaC02g17130D,BnaA02g12790D,BnaA05g33470D
GO:0006644	phospholipid metabolic process	biological_process	6	39262	0.838838	0.919979	0.753678	BnaCnng35860D,BnaA05g14430D,BnaC02g26020D,BnaAnng24000D,BnaA07g01090D,BnaC07g01540D
GO:0015936	coenzyme A metabolic process	biological_process	6	39262	1	1	0.145447	BnaC06g37290D,BnaA07g02540D,BnaA07g32810D,BnaC02g24100D,BnaC07g06390D,BnaAnng37030D
GO:0000045	autophagic vacuole assembly	biological_process	5	39262	0	0	1.38174	BnaC06g06990D,BnaA06g00590D,BnaC06g07010D,BnaA05g25460D,BnaCnng28480D
GO:0000077	DNA damage checkpoint	biological_process	5	39262	0	0	1.38174	BnaC03g53260D,BnaA05g14810D,BnaC06g09750D,BnaA05g31740D,BnaC05g46310D
GO:0005991	trehalose metabolic process	biological_process	5	39262	0	0	1.38174	BnaC01g15870D,BnaA01g35070D,BnaC07g38690D,BnaC03g56490D,BnaA03g46430D
GO:0006427	histidyl-tRNA aminoacylation	biological_process	5	39262	0	0	1.38174	BnaC03g59920D,BnaC03g33120D,BnaA03g28090D,BnaA01g32910D,BnaA08g17140D
GO:0009873	ethylene-activated signaling pathway	biological_process	5	39262	0	0	1.38174	BnaA07g25770D,BnaCnng17850D,BnaC01g40040D,BnaA01g24090D,BnaCnng68360D
GO:0017001	antibiotic catabolic process	biological_process	5	39262	0	0	1.38174	BnaC04g02920D,BnaA05g03320D,BnaC04g48930D,BnaA04g25070D,BnaA03g20230D
GO:0017038	protein import	biological_process	5	39262	0	0	1.38174	BnaC08g19900D,BnaC03g31400D,BnaA03g26540D,BnaA08g21240D,BnaC08g19890D
GO:0034220	ion transmembrane transport	biological_process	5	39262	0	0	1.38174	BnaA09g00960D,BnaC03g30820D,BnaC09g00070D,BnaC02g27060D,BnaA03g26090D
GO:0043044	ATP-dependent chromatin remodeling	biological_process	5	39262	0	0	1.38174	BnaC02g08260D,BnaA05g30940D,BnaAnng03220D,BnaC05g45420D,BnaC09g39190D
GO:0045132	meiotic chromosome segregation	biological_process	5	39262	0	0	1.38174	BnaA03g01210D,BnaCnng10160D,BnaA10g25920D,BnaA01g31730D,BnaC03g71160D
GO:0046373	L-arabinose metabolic process	biological_process	5	39262	0	0	1.38174	BnaA09g11890D,BnaA03g31380D,BnaA01g31470D,BnaC09g50200D,BnaC03g36760D
GO:0046835	carbohydrate phosphorylation	biological_process	5	39262	0	0	1.38174	BnaA01g32760D,BnaC05g45250D,BnaCnng60720D,BnaA05g30800D,BnaA03g29500D
GO:0006672	ceramide metabolic process	biological_process	5	39262	0.143678	0.206836	1.15145	BnaA01g12140D,BnaC01g13830D,BnaC07g37280D,BnaA07g23620D,BnaA03g45300D
GO:0006824	cobalt ion transport	biological_process	5	39262	0.143678	0.206836	1.15145	BnaAnng11650D,BnaC09g09160D,BnaC01g03430D,BnaC03g65540D,BnaA09g08900D
GO:0009772	photosynthetic electron transport in photosystem II	biological_process	5	39262	0.143678	0.206836	1.15145	BnaC05g32120D,BnaC03g60960D,BnaC09g27520D,BnaC05g32130D,BnaC06g14690D
GO:0015675	nickel cation transport	biological_process	5	39262	0.143678	0.206836	1.15145	BnaAnng11650D,BnaC09g09160D,BnaC01g03430D,BnaC03g65540D,BnaA09g08900D
GO:0032968	positive regulation of transcription elongation from RNA polymerase II promoter	biological_process	5	39262	0.143678	0.206836	1.15145	BnaCnng37990D,BnaA10g25940D,BnaC03g28100D,BnaA03g23640D,BnaCnng10200D
GO:0043967	histone H4 acetylation	biological_process	5	39262	0.143678	0.206836	1.15145	BnaA04g26950D,BnaA05g00690D,BnaC04g52380D,BnaC04g51430D,BnaC04g27420D
GO:0043968	histone H2A acetylation	biological_process	5	39262	0.143678	0.206836	1.15145	BnaA04g26950D,BnaA05g00690D,BnaC04g52380D,BnaC04g51430D,BnaC04g27420D
GO:0046654	tetrahydrofolate biosynthetic process	biological_process	5	39262	0.143678	0.206836	1.15145	BnaC05g44750D,BnaA01g32400D,BnaA05g30330D,BnaC02g38700D,BnaA02g30310D
GO:0006431	methionyl-tRNA aminoacylation	biological_process	5	39262	0.381873	0.472741	0.986959	BnaC08g26210D,BnaA09g34980D,BnaC04g25520D,BnaA04g06620D,BnaC04g29310D
GO:0006499	N-terminal protein myristoylation	biological_process	5	39262	0.381873	0.472741	0.986959	BnaA10g11040D,BnaC04g51530D,BnaC09g53700D,BnaC01g18060D,BnaA01g35290D
GO:0071266	'de novo' L-methionine biosynthetic process	biological_process	5	39262	0.381873	0.472741	0.986959	BnaA04g03010D,BnaC08g27980D,BnaC04g24570D,BnaAnng32880D,BnaA09g36390D
GO:0008535	respiratory chain complex IV assembly	biological_process	5	39262	0.612215	0.71029	0.863589	BnaA03g30980D,BnaCnng13130D,BnaCnng24160D,BnaA05g29370D,BnaCnng12680D
GO:0042742	defense response to bacterium	biological_process	5	39262	0.781919	0.871508	0.767635	BnaA03g28770D,BnaA03g28780D,BnaC03g33900D,BnaC05g28240D,BnaA05g17840D
GO:0006420	arginyl-tRNA aminoacylation	biological_process	5	39262	0.887407	0.955401	0.690872	BnaC07g40180D,BnaA01g15450D,BnaC01g18350D,BnaA03g47930D,BnaCnng64110D
GO:0006422	aspartyl-tRNA aminoacylation	biological_process	5	39262	0.887407	0.955401	0.690872	BnaC07g43190D,BnaC01g07270D,BnaA01g06010D,BnaA03g51360D,BnaC05g19840D
GO:0032065	cortical protein anchoring	biological_process	5	39262	0.887407	0.955401	0.690872	BnaC02g04320D,BnaA02g01230D,BnaC09g44380D,BnaC03g09600D,BnaA10g20350D
GO:0006007	glucose catabolic process	biological_process	4	39262	0	0	1.38174	BnaA05g29640D,BnaA08g26140D,BnaC08g13860D,BnaC05g43970D
GO:0006069	ethanol oxidation	biological_process	4	39262	0	0	1.38174	BnaC07g17470D,BnaC09g17760D,BnaA09g16810D,BnaA06g36450D
GO:0006097	glyoxylate cycle	biological_process	4	39262	0	0	1.38174	BnaAnng00830D,BnaC02g02870D,BnaAnng41760D,BnaC06g14420D
GO:0006144	purine nucleobase metabolic process	biological_process	4	39262	0	0	1.38174	BnaA07g06460D,BnaA02g07780D,BnaC07g08000D,BnaC02g10850D
GO:0006303	double-strand break repair via nonhomologous end joining	biological_process	4	39262	0	0	1.38174	BnaC05g13070D,BnaA06g11440D,BnaA08g29690D,BnaC08g03910D
GO:0006333	chromatin assembly or disassembly	biological_process	4	39262	0	0	1.38174	BnaC06g27710D,BnaC02g17020D,BnaA07g25990D,BnaA02g12550D
GO:0006348	chromatin silencing at telomere	biological_process	4	39262	0	0	1.38174	BnaC03g13320D,BnaA03g10630D,BnaC09g33270D,BnaA10g10870D
GO:0006379	mRNA cleavage	biological_process	4	39262	0	0	1.38174	BnaC07g30520D,BnaC04g02780D,BnaA06g26440D,BnaA05g03220D
GO:0006383	transcription from RNA polymerase III promoter	biological_process	4	39262	0	0	1.38174	BnaA10g22580D,BnaA01g14530D,BnaC01g17110D,BnaC09g47140D
GO:0006429	leucyl-tRNA aminoacylation	biological_process	4	39262	0	0	1.38174	BnaA03g25380D,BnaA09g48390D,BnaC03g29830D,BnaC08g42640D
GO:0006450	regulation of translational fidelity	biological_process	4	39262	0	0	1.38174	BnaC07g44000D,BnaA03g52240D,BnaC03g66850D,BnaA08g11970D
GO:0006491	N-glycan processing	biological_process	4	39262	0	0	1.38174	BnaC03g13570D,BnaA03g10900D,BnaA10g10600D,BnaCnng14010D
GO:0006543	glutamine catabolic process	biological_process	4	39262	0	0	1.38174	BnaA07g28110D,BnaA02g14400D,BnaC06g28090D,BnaC02g19320D
GO:0006571	tyrosine biosynthetic process	biological_process	4	39262	0	0	1.38174	BnaA03g20560D,BnaC03g24600D,BnaC08g38730D,BnaA09g56680D
GO:0006573	valine metabolic process	biological_process	4	39262	0	0	1.38174	BnaA08g09990D,BnaC05g14020D,BnaC03g64520D,BnaA06g12420D
GO:0006661	phosphatidylinositol biosynthetic process	biological_process	4	39262	0	0	1.38174	BnaA06g23220D,BnaC03g50140D,BnaC02g42900D,BnaA02g34040D
GO:0006760	folic acid-containing compound metabolic process	biological_process	4	39262	0	0	1.38174	BnaC05g41450D,BnaA05g27340D,BnaAnng09490D,BnaA05g27330D
GO:0006772	thiamine metabolic process	biological_process	4	39262	0	0	1.38174	BnaA08g27250D,BnaC08g00040D,BnaC05g01510D,BnaA10g01480D
GO:0006784	heme a biosynthetic process	biological_process	4	39262	0	0	1.38174	BnaA10g10200D,BnaCnng32620D,BnaCnng32060D,BnaA10g10230D
GO:0006865	amino acid transport	biological_process	4	39262	0	0	1.38174	BnaC02g33700D,BnaA06g35110D,BnaA02g27130D,BnaC07g48770D
GO:0006884	cell volume homeostasis	biological_process	4	39262	0	0	1.38174	BnaC03g51770D,BnaA06g21760D,BnaA02g33340D,BnaCnng53550D
GO:0008615	pyridoxine biosynthetic process	biological_process	4	39262	0	0	1.38174	BnaC04g50900D,BnaC03g27570D,BnaA03g23330D,BnaA04g27170D
GO:0009229	thiamine diphosphate biosynthetic process	biological_process	4	39262	0	0	1.38174	BnaA08g27250D,BnaC08g00040D,BnaC05g01510D,BnaA10g01480D
GO:0009234	menaquinone biosynthetic process	biological_process	4	39262	0	0	1.38174	BnaA02g14110D,BnaC02g18740D,BnaA09g14100D,BnaC09g14630D
GO:0009244	lipopolysaccharide core region biosynthetic process	biological_process	4	39262	0	0	1.38174	BnaA06g27240D,BnaC07g29740D,BnaC02g41040D,BnaA02g32320D
GO:0009688	abscisic acid biosynthetic process	biological_process	4	39262	0	0	1.38174	BnaA09g07610D,BnaC09g07550D,BnaC07g16350D,BnaA07g12170D
GO:0010024	phytochromobilin biosynthetic process	biological_process	4	39262	0	0	1.38174	BnaA03g30860D,BnaA05g29200D,BnaCnng24310D,BnaC03g36180D
GO:0010380	regulation of chlorophyll biosynthetic process	biological_process	4	39262	0	0	1.38174	BnaC05g52070D,BnaC03g38290D,BnaA03g33210D,BnaA05g25350D
GO:0015711	organic anion transport	biological_process	4	39262	0	0	1.38174	BnaC04g06630D,BnaA05g06370D,BnaC04g45930D,BnaA04g22200D
GO:0016051	carbohydrate biosynthetic process	biological_process	4	39262	0	0	1.38174	BnaC03g43420D,BnaC07g07290D,BnaA03g37150D,BnaA07g05940D
GO:0016573	histone acetylation	biological_process	4	39262	0	0	1.38174	BnaC03g13320D,BnaA03g10630D,BnaC09g33270D,BnaA10g10870D
GO:0016598	protein arginylation	biological_process	4	39262	0	0	1.38174	BnaC05g41940D,BnaA10g24850D,BnaC09g49780D,BnaA05g27760D
GO:0019358	nicotinate nucleotide salvage	biological_process	4	39262	0	0	1.38174	BnaA03g53820D,BnaC07g51220D,BnaA09g42000D,BnaCnng42860D
GO:0019370	leukotriene biosynthetic process	biological_process	4	39262	0	0	1.38174	BnaA10g19840D,BnaA02g01700D,BnaC02g04830D,BnaC09g43560D
GO:0019509	L-methionine biosynthetic process from methylthioadenosine	biological_process	4	39262	0	0	1.38174	BnaAnng29390D,BnaC02g14030D,BnaA10g07100D,BnaCnng55890D
GO:0019856	pyrimidine nucleobase biosynthetic process	biological_process	4	39262	0	0	1.38174	BnaA03g45640D,BnaC01g14400D,BnaA01g12680D,BnaC07g37720D
GO:0030261	chromosome condensation	biological_process	4	39262	0	0	1.38174	BnaC04g24560D,BnaA04g03020D,BnaA09g36400D,BnaC08g27990D
GO:0030301	cholesterol transport	biological_process	4	39262	0	0	1.38174	BnaC04g16320D,BnaA07g13510D,BnaC03g59970D,BnaA04g16180D
GO:0030494	bacteriochlorophyll biosynthetic process	biological_process	4	39262	0	0	1.38174	BnaC01g23240D,BnaC08g23140D,BnaA01g19280D,BnaA09g32370D
GO:0031145	anaphase-promoting complex-dependent proteasomal ubiquitin-dependent protein catabolic process	biological_process	4	39262	0	0	1.38174	BnaA01g11370D,BnaC01g12830D,BnaC06g01420D,BnaA06g25330D
GO:0032955	regulation of barrier septum assembly	biological_process	4	39262	0	0	1.38174	BnaA02g14280D,BnaC02g19160D,BnaA07g27930D,BnaC06g30560D
GO:0033615	mitochondrial proton-transporting ATP synthase complex assembly	biological_process	4	39262	0	0	1.38174	BnaA08g27080D,BnaA09g48970D,BnaC08g43270D,BnaC08g02480D
GO:0042779	tRNA 3'-trailer cleavage	biological_process	4	39262	0	0	1.38174	BnaC06g05260D,BnaA05g23440D,BnaC05g37130D,BnaA06g01920D
GO:0043066	negative regulation of apoptotic process	biological_process	4	39262	0	0	1.38174	BnaC09g20030D,BnaA02g25030D,BnaAnng07130D,BnaC02g33230D
GO:0043412	macromolecule modification	biological_process	4	39262	0	0	1.38174	BnaC01g02320D,BnaC06g33200D,BnaA07g29860D,BnaA01g01310D
GO:0044205	'de novo' UMP biosynthetic process	biological_process	4	39262	0	0	1.38174	BnaA07g16410D,BnaA04g04090D,BnaC04g26270D,BnaC06g15260D
GO:0045116	protein neddylation	biological_process	4	39262	0	0	1.38174	BnaC09g38430D,BnaA10g15880D,BnaA03g07510D,BnaC03g09520D
GO:0045900	negative regulation of translational elongation	biological_process	4	39262	0	0	1.38174	BnaA06g19200D,BnaA06g16170D,BnaAnng26360D,BnaC08g20790D
GO:0046294	formaldehyde catabolic process	biological_process	4	39262	0	0	1.38174	BnaC04g01950D,BnaA05g02260D,BnaA03g19510D,BnaC03g23390D
GO:0048278	vesicle docking	biological_process	4	39262	0	0	1.38174	BnaA10g20330D,BnaA03g03950D,BnaC03g05560D,BnaC09g44360D
GO:0051090	regulation of sequence-specific DNA binding transcription factor activity	biological_process	4	39262	0	0	1.38174	BnaA08g28140D,BnaC08g01080D,BnaC05g02960D,BnaA10g03090D
GO:0051188	cofactor biosynthetic process	biological_process	4	39262	0	0	1.38174	BnaC06g35410D,BnaCnng49000D,BnaC02g22900D,BnaA07g31590D
GO:0051225	spindle assembly	biological_process	4	39262	0	0	1.38174	BnaC07g26540D,BnaA03g19440D,BnaA06g30180D,BnaC03g23320D
GO:0051259	protein oligomerization	biological_process	4	39262	0	0	1.38174	BnaC03g02590D,BnaC09g49140D,BnaA10g30380D,BnaA03g55360D
GO:0070409	carbamoyl phosphate biosynthetic process	biological_process	4	39262	0	0	1.38174	BnaA07g28110D,BnaA02g14400D,BnaC06g28090D,BnaC02g19320D
GO:0071267	L-methionine salvage	biological_process	4	39262	0	0	1.38174	BnaAnng29390D,BnaC02g14030D,BnaA10g07100D,BnaCnng55890D
GO:0071586	CAAX-box protein processing	biological_process	4	39262	0	0	1.38174	BnaCnng02060D,BnaA03g26940D,BnaC03g31900D,BnaA09g00060D
GO:0006525	arginine metabolic process	biological_process	4	39262	0.198533	0.2729	1.10539	BnaC02g46570D,BnaA07g35480D,BnaC06g40410D,BnaA02g19550D
GO:0006915	apoptotic process	biological_process	4	39262	0.198533	0.2729	1.10539	BnaA09g53640D,BnaA02g26690D,BnaC09g21210D,BnaA03g49940D
GO:0009103	lipopolysaccharide biosynthetic process	biological_process	4	39262	0.198533	0.2729	1.10539	BnaA08g01380D,BnaC03g69060D,BnaC06g41770D,BnaA05g35640D
GO:0016255	attachment of GPI anchor to protein	biological_process	4	39262	0.198533	0.2729	1.10539	BnaCnng09260D,BnaA05g30440D,BnaA05g30390D,BnaC05g44830D
GO:0006275	regulation of DNA replication	biological_process	4	39262	0.472808	0.569068	0.921162	BnaC08g45280D,BnaC04g54440D,BnaA05g12470D,BnaA09g49520D
GO:0009311	oligosaccharide metabolic process	biological_process	4	39262	0.472808	0.569068	0.921162	BnaC07g11250D,BnaA07g24990D,BnaA07g08990D,BnaC06g26720D
GO:0043666	regulation of phosphoprotein phosphatase activity	biological_process	4	39262	0.472808	0.569068	0.921162	BnaA03g12720D,BnaA10g07550D,BnaC09g28300D,BnaC03g15600D
GO:0000244	spliceosomal tri-snRNP complex assembly	biological_process	4	39262	0.700146	0.789465	0.789568	BnaC01g43100D,BnaCnng78220D,BnaC04g18530D,BnaA01g22230D
GO:0006659	phosphatidylserine biosynthetic process	biological_process	4	39262	0.700146	0.789465	0.789568	BnaAnng23770D,BnaC05g11410D,BnaC08g39040D,BnaA06g38300D
GO:0006729	tetrahydrobiopterin biosynthetic process	biological_process	4	39262	0.700146	0.789465	0.789568	BnaC03g16100D,BnaC05g22790D,BnaA09g26630D,BnaA03g13290D
GO:0015996	chlorophyll catabolic process	biological_process	4	39262	0.700146	0.789465	0.789568	BnaAnng28520D,BnaCnng19750D,BnaA09g16640D,BnaC02g30620D
GO:0042256	mature ribosome assembly	biological_process	4	39262	0.700146	0.789465	0.789568	BnaA09g35240D,BnaA04g03450D,BnaC08g26570D,BnaC04g25350D
GO:0009972	cytidine deamination	biological_process	4	39262	0.846697	0.925512	0.690872	BnaAnng20200D,BnaA03g49610D,BnaCnng32980D,BnaC07g50780D
GO:0034755	iron ion transmembrane transport	biological_process	4	39262	0.92767	0.987113	0.614108	BnaA02g31470D,BnaC03g01300D,BnaA03g00950D,BnaC02g48480D
GO:0009611	response to wounding	biological_process	4	39262	0.986471	1	0.502452	BnaC02g37750D,BnaC03g21710D,BnaA04g11270D,BnaC04g45990D
GO:0000042	protein targeting to Golgi	biological_process	3	39262	0	0	1.38174	BnaC09g08330D,BnaC06g42910D,BnaA09g08140D
GO:0000256	allantoin catabolic process	biological_process	3	39262	0	0	1.38174	BnaA09g20120D,BnaC09g22450D,BnaA04g20820D
GO:0006106	fumarate metabolic process	biological_process	3	39262	0	0	1.38174	BnaC04g51900D,BnaC04g51220D,BnaA05g00440D
GO:0006223	uracil salvage	biological_process	3	39262	0	0	1.38174	BnaA09g54930D,BnaC06g42560D,BnaA07g16160D
GO:0006233	dTDP biosynthetic process	biological_process	3	39262	0	0	1.38174	BnaA10g12450D,BnaC05g21600D,BnaC09g34740D
GO:0006696	ergosterol biosynthetic process	biological_process	3	39262	0	0	1.38174	BnaA03g40700D,BnaC05g03520D,BnaA10g03600D
GO:0009102	biotin biosynthetic process	biological_process	3	39262	0	0	1.38174	BnaA03g20210D,BnaA05g03280D,BnaC04g02890D
GO:0009225	nucleotide-sugar metabolic process	biological_process	3	39262	0	0	1.38174	BnaA05g14410D,BnaCnng35880D,BnaC06g06370D
GO:0015684	ferrous iron transport	biological_process	3	39262	0	0	1.38174	BnaA07g35320D,BnaA07g20060D,BnaC06g19480D
GO:0030245	cellulose catabolic process	biological_process	3	39262	0	0	1.38174	BnaA04g07780D,BnaC04g30040D,BnaA05g12920D
GO:0042128	nitrate assimilation	biological_process	3	39262	0	0	1.38174	BnaA07g20840D,BnaC06g20690D,BnaC06g38300D
GO:0043085	positive regulation of catalytic activity	biological_process	3	39262	0	0	1.38174	BnaA03g14440D,BnaC03g17490D,BnaAnng37220D
GO:0045005	DNA-dependent DNA replication maintenance of fidelity	biological_process	3	39262	0	0	1.38174	BnaC02g16350D,BnaC02g13830D,BnaA02g09880D
GO:0046949	fatty-acyl-CoA biosynthetic process	biological_process	3	39262	0	0	1.38174	BnaC03g34940D,BnaA01g32560D,BnaA03g29700D
GO:0048034	heme O biosynthetic process	biological_process	3	39262	0	0	1.38174	BnaC04g49670D,BnaC04g03820D,BnaA04g25760D
GO:0050954	sensory perception of mechanical stimulus	biological_process	3	39262	0	0	1.38174	BnaA04g29450D,BnaCnng28330D,BnaC04g51030D
GO:0051186	cofactor metabolic process	biological_process	3	39262	0	0	1.38174	BnaA03g20210D,BnaA05g03280D,BnaC04g02890D
GO:0006878	cellular copper ion homeostasis	biological_process	3	39262	0.274329	0.359074	1.03631	BnaA03g30980D,BnaCnng24160D,BnaA05g29370D
GO:0007020	microtubule nucleation	biological_process	3	39262	0.274329	0.359074	1.03631	BnaAnng01810D,BnaA10g24280D,BnaC02g01880D
GO:0007090	regulation of S phase of mitotic cell cycle	biological_process	3	39262	0.274329	0.359074	1.03631	BnaA05g13130D,BnaC03g00130D,BnaC06g42060D
GO:0007094	mitotic spindle assembly checkpoint	biological_process	3	39262	0.274329	0.359074	1.03631	BnaC09g21670D,BnaCnng78570D,BnaA09g19650D
GO:0016125	sterol metabolic process	biological_process	3	39262	0.274329	0.359074	1.03631	BnaC07g14860D,BnaA06g14200D,BnaAnng14740D
GO:0017009	protein-phycocyanobilin linkage	biological_process	3	39262	0.274329	0.359074	1.03631	BnaC01g17010D,BnaA03g13360D,BnaA01g14430D
GO:0018344	protein geranylgeranylation	biological_process	3	39262	0.274329	0.359074	1.03631	BnaC09g44490D,BnaA10g20460D,BnaC03g05360D
GO:0043461	proton-transporting ATP synthase complex assembly	biological_process	3	39262	0.274329	0.359074	1.03631	BnaC09g28050D,BnaC04g32790D,BnaA04g10520D
GO:0045039	protein import into mitochondrial inner membrane	biological_process	3	39262	0.274329	0.359074	1.03631	BnaA04g28560D,BnaA05g12510D,BnaC04g54480D
GO:0019632	shikimate metabolic process	biological_process	3	39262	0.577515	0.675273	0.829046	BnaC03g34680D,BnaA03g29410D,BnaAnng03180D
GO:0050832	defense response to fungus	biological_process	3	39262	0.902637	0.970526	0.592176	BnaA03g28770D,BnaA03g28780D,BnaC03g33900D
GO:0000055	ribosomal large subunit export from nucleus	biological_process	2	39262	0	0	1.38174	BnaA09g46460D,BnaC08g40520D
GO:0000075	cell cycle checkpoint	biological_process	2	39262	0	0	1.38174	BnaA05g31740D,BnaC05g46310D
GO:0000086	G2/M transition of mitotic cell cycle	biological_process	2	39262	0	0	1.38174	BnaA05g21420D,BnaC05g34380D
GO:0000918	barrier septum site selection	biological_process	2	39262	0	0	1.38174	BnaA06g26550D,BnaC07g30410D
GO:0001682	tRNA 5'-leader removal	biological_process	2	39262	0	0	1.38174	BnaC04g29050D,BnaA04g06250D
GO:0001932	regulation of protein phosphorylation	biological_process	2	39262	0	0	1.38174	BnaC07g00870D,BnaA07g00650D
GO:0002098	tRNA wobble uridine modification	biological_process	2	39262	0	0	1.38174	BnaC03g45200D,BnaA03g38360D
GO:0006208	pyrimidine nucleobase catabolic process	biological_process	2	39262	0	0	1.38174	BnaA10g20470D,BnaC09g44500D
GO:0006261	DNA-dependent DNA replication	biological_process	2	39262	0	0	1.38174	BnaA03g22490D,BnaC03g47260D
GO:0006282	regulation of DNA repair	biological_process	2	39262	0	0	1.38174	BnaA01g29890D,BnaC01g37780D
GO:0006425	glutaminyl-tRNA aminoacylation	biological_process	2	39262	0	0	1.38174	BnaC05g20730D,BnaA09g28460D
GO:0006481	C-terminal protein methylation	biological_process	2	39262	0	0	1.38174	BnaA03g02480D,BnaC03g03490D
GO:0006534	cysteine metabolic process	biological_process	2	39262	0	0	1.38174	BnaC09g50970D,BnaC05g06150D
GO:0006591	ornithine metabolic process	biological_process	2	39262	0	0	1.38174	BnaA07g21750D,BnaC06g22470D
GO:0006596	polyamine biosynthetic process	biological_process	2	39262	0	0	1.38174	BnaA04g15860D,BnaC04g39120D
GO:0007021	tubulin complex assembly	biological_process	2	39262	0	0	1.38174	BnaA05g12000D,BnaC04g14370D
GO:0007059	chromosome segregation	biological_process	2	39262	0	0	1.38174	BnaA03g03080D,BnaC03g04500D
GO:0007131	reciprocal meiotic recombination	biological_process	2	39262	0	0	1.38174	BnaA01g24420D,BnaCnng14320D
GO:0007166	cell surface receptor signaling pathway	biological_process	2	39262	0	0	1.38174	BnaC06g01880D,BnaA06g03910D
GO:0008202	steroid metabolic process	biological_process	2	39262	0	0	1.38174	BnaC04g45630D,BnaA04g21780D
GO:0008360	regulation of cell shape	biological_process	2	39262	0	0	1.38174	BnaA09g11110D,BnaC09g11420D
GO:0009063	cellular amino acid catabolic process	biological_process	2	39262	0	0	1.38174	BnaA02g14110D,BnaC02g18740D
GO:0009067	aspartate family amino acid biosynthetic process	biological_process	2	39262	0	0	1.38174	BnaCnng21170D,BnaA09g25320D
GO:0009236	cobalamin biosynthetic process	biological_process	2	39262	0	0	1.38174	BnaC03g68510D,BnaA08g02220D
GO:0009273	peptidoglycan-based cell wall biogenesis	biological_process	2	39262	0	0	1.38174	BnaA09g11110D,BnaC09g11420D
GO:0009312	oligosaccharide biosynthetic process	biological_process	2	39262	0	0	1.38174	BnaA03g38040D,BnaC03g74310D
GO:0009439	cyanate metabolic process	biological_process	2	39262	0	0	1.38174	BnaC07g07990D,BnaA07g06450D
GO:0009443	pyridoxal 5'-phosphate salvage	biological_process	2	39262	0	0	1.38174	BnaA04g08360D,BnaC04g30550D
GO:0009616	virus induced gene silencing	biological_process	2	39262	0	0	1.38174	BnaC05g03550D,BnaA10g03630D
GO:0009934	regulation of meristem structural organization	biological_process	2	39262	0	0	1.38174	BnaA05g21420D,BnaC05g34380D
GO:0010027	thylakoid membrane organization	biological_process	2	39262	0	0	1.38174	BnaA09g43540D,BnaC08g36130D
GO:0015846	polyamine transport	biological_process	2	39262	0	0	1.38174	BnaA07g06870D,BnaCnng19450D
GO:0015851	nucleobase transport	biological_process	2	39262	0	0	1.38174	BnaA03g00930D,BnaC03g01280D
GO:0016180	snRNA processing	biological_process	2	39262	0	0	1.38174	BnaC05g44430D,BnaA05g30100D
GO:0016480	negative regulation of transcription from RNA polymerase III promoter	biological_process	2	39262	0	0	1.38174	BnaA10g20050D,BnaC09g43840D
GO:0017003	protein-heme linkage	biological_process	2	39262	0	0	1.38174	BnaA09g32350D,BnaC08g23120D
GO:0019277	UDP-N-acetylgalactosamine biosynthetic process	biological_process	2	39262	0	0	1.38174	BnaA07g39040D,BnaC06g34580D
GO:0019281	L-methionine biosynthetic process from homoserine via O-succinyl-L-homoserine and cystathionine	biological_process	2	39262	0	0	1.38174	BnaC03g77470D,BnaA08g13000D
GO:0019295	coenzyme M biosynthetic process	biological_process	2	39262	0	0	1.38174	BnaA03g58470D,BnaC07g36650D
GO:0019363	pyridine nucleotide biosynthetic process	biological_process	2	39262	0	0	1.38174	BnaC02g33940D,BnaA02g26970D
GO:0019427	acetyl-CoA biosynthetic process from acetate	biological_process	2	39262	0	0	1.38174	BnaA04g12330D,BnaC04g33330D
GO:0019478	D-amino acid catabolic process	biological_process	2	39262	0	0	1.38174	BnaA01g09250D,BnaC01g10850D
GO:0019556	histidine catabolic process to glutamate and formamide	biological_process	2	39262	0	0	1.38174	BnaA04g03340D,BnaC04g25230D
GO:0019627	urea metabolic process	biological_process	2	39262	0	0	1.38174	BnaC02g45820D,BnaA02g13220D
GO:0030041	actin filament polymerization	biological_process	2	39262	0	0	1.38174	BnaC04g29040D,BnaA04g06240D
GO:0030328	prenylcysteine catabolic process	biological_process	2	39262	0	0	1.38174	BnaA06g23050D,BnaC03g50390D
GO:0031167	rRNA methylation	biological_process	2	39262	0	0	1.38174	BnaC07g25110D,BnaA06g31480D
GO:0032324	molybdopterin cofactor biosynthetic process	biological_process	2	39262	0	0	1.38174	BnaC03g10400D,BnaA03g08200D
GO:0032508	DNA duplex unwinding	biological_process	2	39262	0	0	1.38174	BnaC02g47890D,BnaA02g26290D
GO:0034184	positive regulation of maintenance of mitotic sister chromatid cohesion	biological_process	2	39262	0	0	1.38174	BnaC05g38470D,BnaA05g24440D
GO:0042273	ribosomal large subunit biogenesis	biological_process	2	39262	0	0	1.38174	BnaA09g46460D,BnaC08g40520D
GO:0042558	pteridine-containing compound metabolic process	biological_process	2	39262	0	0	1.38174	BnaC01g08380D,BnaA01g06970D
GO:0043419	urea catabolic process	biological_process	2	39262	0	0	1.38174	BnaC02g45820D,BnaA02g13220D
GO:0045739	positive regulation of DNA repair	biological_process	2	39262	0	0	1.38174	BnaC07g44040D,BnaA03g52280D
GO:0045842	positive regulation of mitotic metaphase/anaphase transition	biological_process	2	39262	0	0	1.38174	BnaC05g38470D,BnaA05g24440D
GO:0045980	negative regulation of nucleotide metabolic process	biological_process	2	39262	0	0	1.38174	BnaC03g01720D,BnaA03g01410D
GO:0046080	dUTP metabolic process	biological_process	2	39262	0	0	1.38174	BnaC03g56190D,BnaA06g17760D
GO:0046653	tetrahydrofolate metabolic process	biological_process	2	39262	0	0	1.38174	BnaA04g14510D,BnaC04g36290D
GO:0048280	vesicle fusion with Golgi apparatus	biological_process	2	39262	0	0	1.38174	BnaA06g32030D,BnaC07g24450D
GO:0048478	replication fork protection	biological_process	2	39262	0	0	1.38174	BnaCnng05970D,BnaA05g33320D
GO:0050821	protein stabilization	biological_process	2	39262	0	0	1.38174	BnaA06g19410D,BnaC04g24910D
GO:0051297	centrosome organization	biological_process	2	39262	0	0	1.38174	BnaA03g19440D,BnaC03g23320D
GO:0070526	threonylcarbamoyladenosine biosynthetic process	biological_process	2	39262	0	0	1.38174	BnaC04g04140D,BnaA05g04660D
GO:0006177	GMP biosynthetic process	biological_process	2	39262	0.379061	0.471389	0.921162	BnaC09g12810D,BnaA09g12410D
GO:0006437	tyrosyl-tRNA aminoacylation	biological_process	2	39262	0.379061	0.471389	0.921162	BnaC03g33100D,BnaA03g28070D
GO:0006808	regulation of nitrogen utilization	biological_process	2	39262	0.379061	0.471389	0.921162	BnaA03g26470D,BnaC03g31330D
GO:0030154	cell differentiation	biological_process	2	39262	0.379061	0.471389	0.921162	BnaA07g00700D,BnaC07g00040D
GO:0030488	tRNA methylation	biological_process	2	39262	0.379061	0.471389	0.921162	BnaC09g42900D,BnaA10g19210D
GO:0034227	tRNA thio-modification	biological_process	2	39262	0.379061	0.471389	0.921162	BnaA03g56920D,BnaC03g25390D
GO:0044238	primary metabolic process	biological_process	2	39262	0.379061	0.471389	0.921162	BnaA09g04830D,BnaC09g04350D
GO:0051302	regulation of cell division	biological_process	2	39262	0.379061	0.471389	0.921162	BnaA07g00700D,BnaC07g00040D
GO:0071951	conversion of methionyl-tRNA to N-formyl-methionyl-tRNA	biological_process	2	39262	0.379061	0.471389	0.921162	BnaC06g27510D,BnaA07g25900D
GO:0006570	tyrosine metabolic process	biological_process	2	39262	0.693255	0.787093	0.690872	BnaC02g13840D,BnaA02g09890D
GO:0018343	protein farnesylation	biological_process	2	39262	0.693255	0.787093	0.690872	BnaC04g32260D,BnaA04g10140D
GO:0042127	regulation of cell proliferation	biological_process	2	39262	0.693255	0.787093	0.690872	BnaC04g32260D,BnaA04g10140D
GO:0051028	mRNA transport	biological_process	2	39262	0.693255	0.787093	0.690872	BnaC09g08560D,BnaA03g38370D
GO:0009060	aerobic respiration	biological_process	2	39262	0.866865	0.943168	0.552697	BnaC04g21290D,BnaCnng12480D
GO:0042450	arginine biosynthetic process via ornithine	biological_process	2	39262	0.866865	0.943168	0.552697	BnaC09g45590D,BnaA10g21480D
GO:0090116	C-5 methylation of cytosine	biological_process	2	39262	0.946802	1	0.460581	BnaC08g34700D,BnaA09g42250D
GO:0015886	heme transport	biological_process	2	39262	0.979927	1	0.394784	BnaCnng13130D,BnaCnng12680D
GO:0016973	poly(A)+ mRNA export from nucleus	biological_process	2	39262	0.979927	1	0.394784	BnaA09g46560D,BnaC08g40580D
GO:0009790	embryo development	biological_process	2	39262	0.999709	1	0.251226	BnaA03g55670D,BnaC09g48810D
GO:0010212	response to ionizing radiation	biological_process	1	39262	0	0	1.38174	BnaC03g53260D
GO:0016572	histone phosphorylation	biological_process	1	39262	0	0	1.38174	BnaC03g53260D
GO:0043087	regulation of GTPase activity	biological_process	1	39262	0	0	1.38174	BnaC05g38610D
GO:0046660	female sex differentiation	biological_process	1	39262	0	0	1.38174	BnaA01g23100D
GO:0051056	regulation of small GTPase mediated signal transduction	biological_process	1	39262	0	0	1.38174	BnaA05g20900D
GO:0090399	replicative senescence	biological_process	1	39262	0	0	1.38174	BnaC03g53260D
GO:0019646	aerobic electron transport chain	biological_process	1	39262	0.523772	0.621271	0.690872	BnaCnng12720D
GO:0015074	DNA integration	biological_process	1	39262	0.997626	1	0.197392	BnaC04g13640D
GO:0016020	membrane	cellular_component	2795	39262	2.42e-12	6.22e-12	1.06714	BnaC09g32940D,BnaC07g15830D,BnaC09g38160D,BnaC06g15470D,BnaC02g17990D,BnaC05g22330D,BnaA03g14320D,BnaC03g41960D,BnaC07g29030D,BnaC03g18950D,BnaA04g02840D,BnaC07g45790D,BnaA08g16660D,BnaC07g01980D,BnaA07g20910D,BnaCnng63980D,BnaA06g33150D,BnaA07g29870D,BnaA02g15690D,BnaA04g14030D,BnaC06g25780D,BnaC09g20290D,BnaA03g50250D,BnaA08g13240D,BnaC03g64710D,BnaA06g35480D,BnaA07g20100D,BnaC07g50350D,BnaC01g…
GO:0005622	intracellular	cellular_component	2187	39262	6.2e-49	1.63e-48	1.16405	BnaA04g01110D,BnaC02g11640D,BnaC08g42570D,BnaC08g45180D,BnaA08g18670D,BnaA09g52630D,BnaC07g26420D,BnaA09g55240D,BnaA05g34040D,BnaC03g08960D,BnaC03g13200D,BnaA08g17260D,BnaAnng00510D,BnaAnng09470D,BnaC01g11440D,BnaC07g16750D,BnaC06g13780D,BnaA06g35480D,BnaA03g12630D,BnaC01g35600D,BnaAnng02840D,BnaC03g09880D,BnaC03g11510D,BnaC01g26370D,BnaA03g29570D,BnaC08g32090D,BnaC06g20350D,BnaA02g21980D,BnaA07g…
GO:0016021	integral component of membrane	cellular_component	1946	39262	0.0285535	0.0489489	1.022	BnaC01g16870D,BnaC02g04260D,BnaA09g00840D,BnaC03g41960D,BnaC02g02250D,BnaC07g01980D,BnaA03g02480D,BnaA05g35770D,BnaC07g02580D,BnaC08g42890D,BnaA01g23150D,BnaA10g29800D,BnaC09g41840D,BnaC01g12040D,BnaC01g28380D,BnaA06g23480D,BnaC01g21750D,BnaA07g35030D,BnaA03g14960D,BnaC03g18460D,BnaA08g16170D,BnaA02g37030D,BnaA08g24150D,BnaA06g33790D,BnaA07g31010D,BnaCnng06500D,BnaA01g06430D,BnaA03g26150D,BnaA10g…
GO:0005634	nucleus	cellular_component	1705	39262	0.00699297	0.0136862	1.03057	BnaCnng74250D,BnaA06g24570D,BnaA03g04490D,BnaC06g23450D,BnaC07g17030D,BnaA01g34550D,BnaA02g35510D,BnaA03g03080D,BnaCnng64580D,BnaA10g00050D,BnaC06g28390D,BnaC04g08510D,BnaC03g31160D,BnaA01g02900D,BnaC01g22030D,BnaA10g04390D,BnaC03g06140D,BnaC01g35600D,BnaA06g36080D,BnaA02g35830D,BnaA10g02380D,BnaA06g21470D,BnaA01g04100D,BnaA07g33020D,BnaC03g55640D,BnaC03g01840D,BnaC03g02440D,BnaCnng62080D,BnaC02g…
GO:0005840	ribosome	cellular_component	1143	39262	1.4e-39	3.66e-39	1.20468	BnaA04g01110D,BnaC02g11640D,BnaC08g42570D,BnaC08g45180D,BnaC07g26420D,BnaA09g55240D,BnaA05g34040D,BnaC03g08960D,BnaC03g13200D,BnaA08g17260D,BnaAnng02840D,BnaA03g29570D,BnaC08g32090D,BnaA02g21980D,BnaC01g37930D,BnaAnng28200D,BnaA02g30400D,BnaC02g12070D,BnaC04g42750D,BnaA08g29090D,BnaA04g28840D,BnaC05g07130D,BnaA10g10840D,BnaC03g13350D,BnaC02g00390D,BnaC03g58890D,BnaC01g30810D,BnaA04g01580D,BnaA06g…
GO:0005737	cytoplasm	cellular_component	835	39262	2.35e-21	6.12e-21	1.17252	BnaA09g53230D,BnaAnng41710D,BnaC09g45860D,BnaC01g22030D,BnaC09g41840D,BnaC05g28190D,BnaA07g31010D,BnaA09g00670D,BnaCnng62080D,BnaC03g08790D,BnaC03g19380D,BnaA05g29800D,BnaA05g15950D,BnaC01g32820D,BnaA04g16190D,BnaA01g31280D,BnaA03g25380D,BnaC07g37320D,BnaA03g10770D,BnaA07g05540D,BnaC09g03560D,BnaC05g44140D,BnaA05g29950D,BnaC04g07890D,BnaA07g08470D,BnaA04g21230D,BnaA06g05340D,BnaA01g06090D,BnaC06g…
GO:0005618	cell wall	cellular_component	204	39262	0.99998	1	0.854168	BnaCnng61650D,BnaC03g66720D,BnaA05g07650D,BnaC03g67960D,BnaA01g06750D,BnaA05g31580D,BnaA01g15000D,BnaC07g42520D,BnaA02g04440D,BnaA10g06710D,BnaA06g07180D,BnaC08g20880D,BnaA08g06970D,BnaC02g00700D,BnaUnng03540D,BnaC04g33340D,BnaCnng48920D,BnaA01g29470D,BnaA03g50050D,BnaA01g03620D,BnaA09g01390D,BnaA04g12290D,BnaA06g17460D,BnaC01g08350D,BnaC08g44200D,BnaA10g01400D,BnaCnng60500D,BnaC07g02990D,BnaAnng…
GO:0005875	microtubule associated complex	cellular_component	177	39262	1.17e-09	2.98e-09	1.23519	BnaC02g21300D,BnaA04g21400D,BnaA02g34890D,BnaA01g16240D,BnaA09g11080D,BnaC08g22570D,BnaA07g06290D,BnaC01g28200D,BnaA03g02940D,BnaC01g23900D,BnaA01g23610D,BnaC05g17090D,BnaC06g41060D,BnaA06g38870D,BnaC02g41890D,BnaA05g21080D,BnaC03g54520D,BnaA07g10070D,BnaAnng07580D,BnaC07g28380D,BnaA03g39840D,BnaC03g60320D,BnaC08g21620D,BnaA09g44600D,BnaC03g22530D,BnaC08g37310D,BnaA05g28490D,BnaC01g16000D,BnaC01g…
GO:0000786	nucleosome	cellular_component	174	39262	3.68e-08	9.19e-08	1.21426	BnaAnng04850D,BnaC03g55640D,BnaA09g53380D,BnaCnng08660D,BnaA06g11800D,BnaC03g26430D,BnaC03g68390D,BnaC05g04670D,BnaA06g18260D,BnaA06g05170D,BnaA03g18140D,BnaA07g14090D,BnaC09g46260D,BnaC03g04250D,BnaA02g06910D,BnaC08g25320D,BnaCnng17200D,BnaCnng10730D,BnaC02g44320D,BnaC06g05580D,BnaC06g02160D,BnaA04g17710D,BnaC01g26310D,BnaA04g16620D,BnaC05g27040D,BnaA03g02890D,BnaA01g27090D,BnaC06g22280D,BnaA05g…
GO:0000151	ubiquitin ligase complex	cellular_component	174	39262	1.96e-07	4.82e-07	1.20212	BnaCnng64260D,BnaA10g08090D,BnaA02g33500D,BnaA07g29060D,BnaC06g37130D,BnaCnng58610D,BnaAnng04680D,BnaA03g10450D,BnaC07g15170D,BnaA04g20950D,BnaC04g40080D,BnaC06g32170D,BnaA06g19180D,BnaC04g50550D,BnaC02g43580D,BnaAnng35870D,BnaA10g16520D,BnaC05g44600D,BnaC04g04610D,BnaA01g20980D,BnaA08g21660D,BnaC02g45900D,BnaC03g52660D,BnaC08g25640D,BnaC03g76650D,BnaC04g21800D,BnaC03g49620D,BnaA03g07040D,BnaC03g…
GO:0005783	endoplasmic reticulum	cellular_component	174	39262	0.00036342	0.000816206	1.13407	BnaC08g43170D,BnaA03g02480D,BnaA03g21850D,BnaCnng55510D,BnaC08g18780D,BnaA01g13310D,BnaA02g30380D,BnaA06g13470D,BnaCnng49520D,BnaA07g38420D,BnaA08g26940D,BnaC03g31280D,BnaA05g00500D,BnaC05g33360D,BnaC07g14860D,BnaC08g25810D,BnaC03g40990D,BnaC09g43160D,BnaC04g02920D,BnaC03g29330D,BnaC09g12430D,BnaA03g40700D,BnaC02g21250D,BnaC01g43040D,BnaC05g42250D,BnaCnng06280D,BnaC04g13170D,BnaA04g20580D,BnaA06g…
GO:0048046	apoplast	cellular_component	163	39262	0.00750496	0.0146534	1.09865	BnaC03g67960D,BnaA01g06750D,BnaC05g01100D,BnaAnng02990D,BnaA01g15000D,BnaCnng57030D,BnaCnng02950D,BnaC07g42520D,BnaA10g26680D,BnaA06g07180D,BnaA09g39580D,BnaC08g09710D,BnaA08g06970D,BnaA08g26300D,BnaC08g31950D,BnaAnng08030D,BnaA03g50050D,BnaC04g07220D,BnaA09g01390D,BnaA06g05460D,BnaC04g14580D,BnaC02g03260D,BnaC07g02990D,BnaAnng03530D,BnaA05g05410D,BnaC07g39910D,BnaA03g10220D,BnaA04g21810D,BnaA03g…
GO:0005576	extracellular region	cellular_component	132	39262	0.999968	1	0.825295	BnaC04g49060D,BnaC09g36790D,BnaCnng31520D,BnaA03g38630D,BnaCnng06330D,BnaCnng02630D,BnaCnng17400D,BnaC01g04530D,BnaA03g52720D,BnaC01g20780D,BnaA02g08750D,BnaC07g34020D,BnaAnng00290D,BnaA07g00550D,BnaC02g16840D,BnaC07g44470D,BnaA01g20950D,BnaA05g03400D,BnaC02g03580D,BnaC01g26290D,BnaA01g03250D,BnaA06g08040D,BnaC04g40170D,BnaAnng35810D,BnaA02g14340D,BnaA06g33850D,BnaC07g00140D,BnaA02g35230D,BnaC03g…
GO:0015935	small ribosomal subunit	cellular_component	95	39262	0.000302036	0.000684893	1.18257	BnaAnng28200D,BnaC04g42260D,BnaA10g26850D,BnaA06g19350D,BnaC06g33580D,BnaC02g22690D,BnaC03g74030D,BnaCnng13040D,BnaC03g31130D,BnaA04g14320D,BnaC02g00850D,BnaC03g74960D,BnaC09g27990D,BnaC07g07780D,BnaC02g03430D,BnaUnng00880D,BnaC09g16570D,BnaA10g07870D,BnaA01g34120D,BnaA07g06200D,BnaC03g17580D,BnaC04g02200D,BnaC05g19970D,BnaC05g02380D,BnaC09g29280D,BnaA01g23500D,BnaC08g43840D,BnaA10g18910D,BnaA09g…
GO:0005643	nuclear pore	cellular_component	90	39262	1.12e-05	2.7e-05	1.23126	BnaC09g40920D,BnaA07g37040D,BnaC06g05310D,BnaC07g47620D,BnaC06g05290D,BnaA04g18170D,BnaA10g30440D,BnaA08g19040D,BnaA01g29590D,BnaC01g37210D,BnaA10g17560D,BnaC04g47780D,BnaA01g33380D,BnaA06g06180D,BnaA05g29380D,BnaA09g46560D,BnaC07g50410D,BnaC01g20230D,BnaA07g34790D,BnaC04g52130D,BnaA09g08910D,BnaC04g12980D,BnaC08g39240D,BnaA06g37350D,BnaCnng26980D,BnaA03g14650D,BnaA04g24020D,BnaA09g45410D,BnaA02g…
GO:0015934	large ribosomal subunit	cellular_component	85	39262	0.000924025	0.00202008	1.17448	BnaAnng03930D,BnaC09g06510D,BnaA02g30400D,BnaA02g09230D,BnaC08g29370D,BnaC04g52560D,BnaC08g21480D,BnaA04g15900D,BnaA07g25010D,BnaC02g13280D,BnaAnng21810D,BnaA06g04800D,BnaC03g51660D,BnaA03g08540D,BnaC05g51070D,BnaC07g18940D,BnaA09g19640D,BnaC07g12420D,BnaC03g57660D,BnaC09g16660D,BnaA09g36830D,BnaC02g09520D,BnaA06g29980D,BnaA04g01900D,BnaCnng21840D,BnaC03g31140D,BnaA09g27910D,BnaC01g26350D,BnaC07g…
GO:0000145	exocyst	cellular_component	83	39262	0.00253391	0.00525315	1.15843	BnaA10g06080D,BnaA05g05960D,BnaC06g04710D,BnaC04g25700D,BnaCnng19240D,BnaA03g04630D,BnaA03g31170D,BnaCnng44410D,BnaC06g32800D,BnaC02g10670D,BnaCnng02750D,BnaA08g00910D,BnaA02g01950D,BnaC09g43940D,BnaCnng07830D,BnaC03g36500D,BnaA05g25360D,BnaAnng35640D,BnaA07g14030D,BnaA02g29900D,BnaC06g41930D,BnaA03g09290D,BnaC09g35070D,BnaC06g08890D,BnaAnng20790D,BnaA05g05940D,BnaA05g15270D,BnaC03g71400D,BnaA08g…
GO:0009523	photosystem II	cellular_component	83	39262	0.00797689	0.0154101	1.13549	BnaC01g21750D,BnaC01g09810D,BnaA07g04280D,BnaA09g43540D,BnaA04g16500D,BnaA10g04360D,BnaC05g32120D,BnaA10g27910D,BnaA08g05700D,BnaC03g60960D,BnaC09g27520D,BnaC04g41290D,BnaC08g07970D,BnaC09g45140D,BnaA07g20510D,BnaA09g19870D,BnaC09g07990D,BnaA01g19750D,BnaCnng27800D,BnaC05g04590D,BnaA04g17660D,BnaC07g16640D,BnaC06g37830D,BnaA06g19410D,BnaA07g32780D,BnaC06g26560D,BnaC05g04700D,BnaC04g06020D,BnaC01g…
GO:0005839	proteasome core complex	cellular_component	82	39262	6.52e-05	0.000153524	1.21831	BnaA05g17000D,BnaC04g18160D,BnaA02g19190D,BnaC05g09110D,BnaA08g24440D,BnaA01g05950D,BnaC04g17530D,BnaA04g01060D,BnaA03g22250D,BnaA06g15450D,BnaA09g31830D,BnaA08g03990D,BnaA09g15700D,BnaAnng29850D,BnaC08g22660D,BnaC04g38540D,BnaC06g41960D,BnaA06g32120D,BnaC03g67700D,BnaC03g56940D,BnaA05g14110D,BnaC09g17140D,BnaA03g60760D,BnaA07g20430D,BnaAnng21900D,BnaA01g18920D,BnaC07g04250D,BnaC06g39610D,BnaA07g…
GO:0030117	membrane coat	cellular_component	72	39262	8.31e-05	0.000194496	1.22822	BnaA03g46120D,BnaC07g38240D,BnaC01g03930D,BnaA03g33990D,BnaC09g46600D,BnaA03g03370D,BnaAnng03410D,BnaC01g00490D,BnaC07g31900D,BnaCnng57320D,BnaA06g40470D,BnaC03g67560D,BnaC01g35030D,BnaC07g47050D,BnaC07g12940D,BnaC01g23970D,BnaC03g29080D,BnaC06g19030D,BnaC01g03160D,BnaC03g04800D,BnaAnng39290D,BnaA10g13780D,BnaC01g07000D,BnaC06g09660D,BnaC07g05510D,BnaC07g43280D,BnaA09g54620D,BnaCnng77970D,BnaA08g…
GO:0043234	protein complex	cellular_component	71	39262	0.267651	0.357157	1.03267	BnaC09g37880D,BnaAnng41710D,BnaC09g44450D,BnaA02g31320D,BnaC03g75120D,BnaA03g53640D,BnaA06g17780D,BnaA10g15400D,BnaCnng62490D,BnaC02g29260D,BnaA05g09090D,BnaA10g20420D,BnaC02g31030D,BnaA03g44640D,BnaC04g54460D,BnaCnng51680D,BnaC03g09740D,BnaC03g68420D,BnaC05g50610D,BnaA10g09500D,BnaA07g32090D,BnaC04g10450D,BnaA03g07740D,BnaA08g02320D,BnaA06g20530D,BnaA09g17090D,BnaC08g23960D,BnaC02g09000D,BnaA08g…
GO:0005874	microtubule	cellular_component	70	39262	0.10057	0.152104	1.07469	BnaA04g08060D,BnaC09g37880D,BnaC09g44450D,BnaA02g31320D,BnaC03g75120D,BnaA06g17780D,BnaA10g15400D,BnaCnng62490D,BnaC02g29260D,BnaA05g09090D,BnaA10g20420D,BnaC02g31030D,BnaA03g44640D,BnaC05g02060D,BnaC04g54460D,BnaCnng51680D,BnaC03g09740D,BnaC03g68420D,BnaC05g50610D,BnaA10g09500D,BnaA07g32090D,BnaC04g10450D,BnaA03g07740D,BnaA08g02320D,BnaA06g20530D,BnaA09g17090D,BnaC02g09000D,BnaA08g09560D,BnaA05g…
GO:0009507	chloroplast	cellular_component	67	39262	0.0998267	0.151119	1.07647	BnaA03g20590D,BnaC09g52570D,BnaA09g07610D,BnaC04g23840D,BnaC01g39740D,BnaA10g27910D,BnaC09g07550D,BnaA10g15260D,BnaC04g41290D,BnaC05g52070D,BnaA03g06760D,BnaA06g33410D,BnaC07g16350D,BnaA04g25510D,BnaA02g03760D,BnaA10g16930D,BnaA04g17660D,BnaA07g12170D,BnaC04g09640D,BnaC03g24630D,BnaA10g06750D,BnaC03g38290D,BnaC05g04700D,BnaA06g33160D,BnaA04g27610D,BnaA09g45900D,BnaA03g33210D,BnaA01g12060D,BnaC01g…
GO:0005694	chromosome	cellular_component	55	39262	0.0630723	0.100671	1.10139	BnaA04g01750D,BnaC04g26130D,BnaA01g07960D,BnaA05g28510D,BnaA05g20130D,BnaC09g31620D,BnaC07g25420D,BnaAnng14600D,BnaA09g11340D,BnaC03g01590D,BnaC09g11780D,BnaCnng10360D,BnaC08g39590D,BnaC03g70890D,BnaC05g42830D,BnaA10g26080D,BnaA03g14820D,BnaC02g13170D,BnaC03g17870D,BnaA01g05990D,BnaA03g31350D,BnaC03g36740D,BnaA01g29970D,BnaAnng17740D,BnaC02g42810D,BnaCnng15200D,BnaC05g31500D,BnaC01g14640D,BnaA10g…
GO:0009654	photosystem II oxygen evolving complex	cellular_component	54	39262	0.107153	0.159854	1.08136	BnaC01g09810D,BnaA04g16500D,BnaA10g04360D,BnaA08g05700D,BnaC09g45140D,BnaA07g20510D,BnaA09g19870D,BnaC09g07990D,BnaA01g19750D,BnaCnng27800D,BnaC05g04590D,BnaC07g16640D,BnaC06g37830D,BnaA07g32780D,BnaC04g06020D,BnaC01g12690D,BnaC01g12660D,BnaC06g20160D,BnaC06g37260D,BnaA03g58900D,BnaA05g34630D,BnaA05g33860D,BnaC02g25420D,BnaC04g06110D,BnaA04g03690D,BnaAnng40550D,BnaC08g22200D,BnaA06g28830D,BnaA01g…
GO:0016459	myosin complex	cellular_component	50	39262	0.119162	0.175226	1.07949	BnaC09g51820D,BnaA09g44950D,BnaA03g52400D,BnaC07g00690D,BnaC05g06330D,BnaCnng51610D,BnaC07g44150D,BnaC04g23790D,BnaUnng05320D,BnaA02g10320D,BnaA06g05060D,BnaA09g16710D,BnaC03g10110D,BnaC08g00770D,BnaC02g14400D,BnaA08g26800D,BnaC03g41300D,BnaA03g35510D,BnaC01g40760D,BnaA06g02860D,BnaA02g04890D,BnaC01g04980D,BnaC08g43760D,BnaC09g30710D,BnaA04g02130D,BnaC07g17450D,BnaC08g07170D,BnaUnng05330D,BnaA06g…
GO:0005856	cytoskeleton	cellular_component	49	39262	0.00192129	0.00405469	1.20903	BnaA09g14200D,BnaC04g13710D,BnaA02g34890D,BnaC06g42810D,BnaA07g18620D,BnaCnng28290D,BnaC03g56850D,BnaC05g48130D,BnaA04g25860D,BnaC07g08720D,BnaC08g30510D,BnaA09g01850D,BnaC05g51270D,BnaAnng01810D,BnaA06g07560D,BnaC07g49030D,BnaA04g01270D,BnaC01g40640D,BnaA09g38350D,BnaA05g10190D,BnaA10g02040D,BnaA07g07040D,BnaC04g29040D,BnaA06g24200D,BnaC09g14740D,BnaA09g25680D,BnaC03g24990D,BnaC04g22210D,BnaA10g…
GO:0005777	peroxisome	cellular_component	49	39262	0.25126	0.338583	1.04162	BnaC03g49190D,BnaA05g34190D,BnaC05g04350D,BnaA09g39750D,BnaC07g29810D,BnaC09g06780D,BnaC09g40380D,BnaC07g31070D,BnaA07g27290D,BnaC07g34950D,BnaC01g31970D,BnaA03g40010D,BnaC05g18270D,BnaC07g49870D,BnaC02g42090D,BnaA10g17190D,BnaA10g28090D,BnaA10g28060D,BnaA10g22990D,BnaA06g27160D,BnaCnng39220D,BnaAnng06840D,BnaA10g22320D,BnaC07g35760D,BnaC03g33440D,BnaCnng35000D,BnaA09g07080D,BnaC02g48810D,BnaC07g…
GO:0009522	photosystem I	cellular_component	49	39262	0.322362	0.413388	1.02584	BnaC05g32150D,BnaC03g50210D,BnaA09g25260D,BnaA01g28200D,BnaC09g27670D,BnaA05g23550D,BnaC01g09730D,BnaC09g27640D,BnaA10g13980D,BnaA06g01680D,BnaC03g59670D,BnaC04g15560D,BnaA08g04820D,BnaC06g07480D,BnaC06g41070D,BnaA09g01080D,BnaA06g00210D,BnaC09g27530D,BnaC08g09180D,BnaA07g06900D,BnaC04g55930D,BnaA08g00380D,BnaC08g05450D,BnaA08g01590D,BnaC09g06210D,BnaC03g69350D,BnaC05g23270D,BnaC01g21770D,BnaA05g…
GO:0030131	clathrin adaptor complex	cellular_component	47	39262	2.57e-06	6.28e-06	1.32535	BnaA06g06600D,BnaC07g38240D,BnaA03g03370D,BnaAnng03410D,BnaA03g06270D,BnaC09g19520D,BnaC03g08070D,BnaA03g55100D,BnaAnng17500D,BnaC07g12940D,BnaA06g40410D,BnaC03g04800D,BnaA01g35650D,BnaA02g36610D,BnaA10g13780D,BnaC03g29370D,BnaC08g11670D,BnaA09g54620D,BnaC07g19340D,BnaA01g13930D,BnaC08g49960D,BnaC05g19050D,BnaC03g01910D,BnaA01g23050D,BnaA09g21780D,BnaC02g32570D,BnaA01g35660D,BnaA09g15310D,BnaA07g…
GO:0030288	outer membrane-bounded periplasmic space	cellular_component	47	39262	0.802646	0.887282	0.927742	BnaA03g14960D,BnaA05g10840D,BnaC02g38550D,BnaA02g00890D,BnaC04g23810D,BnaC09g02410D,BnaA10g26130D,BnaA04g16910D,BnaA01g33670D,BnaC04g37100D,BnaA09g32030D,BnaA06g30230D,BnaCnng22760D,BnaC08g44070D,BnaA09g02980D,BnaC09g51310D,BnaC05g03240D,BnaCnng51940D,BnaA09g02950D,BnaC04g12400D,BnaA09g50380D,BnaA04g16920D,BnaC08g05620D,BnaCnng32830D,BnaC07g26470D,BnaA05g13030D,BnaA02g30130D,BnaAnng26240D,BnaA09g…
GO:0005789	endoplasmic reticulum membrane	cellular_component	45	39262	3.32e-05	7.93e-05	1.29538	BnaA08g25070D,BnaC03g64370D,BnaC04g30900D,BnaC02g09340D,BnaA05g33900D,BnaA09g07760D,BnaC08g41770D,BnaA08g23670D,BnaC04g06450D,BnaC03g25290D,BnaA06g35890D,BnaA07g25770D,BnaC08g16860D,BnaC06g33350D,BnaA03g58520D,BnaA06g10750D,BnaC07g36590D,BnaA09g56460D,BnaA05g04210D,BnaC05g48780D,BnaC04g05050D,BnaCnng17850D,BnaC08g15140D,BnaA01g11060D,BnaC01g40040D,BnaC07g19550D,BnaA03g56790D,BnaA01g24090D,BnaC09g…
GO:0000159	protein phosphatase type 2A complex	cellular_component	45	39262	0.0206466	0.0362638	1.15145	BnaC01g31410D,BnaC03g35810D,BnaA06g03480D,BnaA05g28660D,BnaA07g16560D,BnaA06g08530D,BnaC06g08970D,BnaC05g43110D,BnaA08g22990D,BnaA01g18630D,BnaC07g23190D,BnaC06g04750D,BnaA09g44840D,BnaC06g15500D,BnaA05g15320D,BnaAnng00670D,BnaC04g27230D,BnaA01g24050D,BnaA02g31940D,BnaA06g11930D,BnaA08g01840D,BnaA06g27770D,BnaC05g09900D,BnaC05g30730D,BnaC05g49990D,BnaC07g32950D,BnaC02g35870D,BnaA06g02170D,BnaA02g…
GO:0019898	extrinsic component of membrane	cellular_component	44	39262	0.305779	0.397078	1.03045	BnaA04g16500D,BnaA10g04360D,BnaA08g05700D,BnaC09g45140D,BnaA09g19870D,BnaC09g07990D,BnaA01g19750D,BnaCnng27800D,BnaC05g04590D,BnaC07g16640D,BnaC06g37830D,BnaA07g32780D,BnaC04g06020D,BnaC01g12690D,BnaC01g12660D,BnaC06g37260D,BnaA05g34630D,BnaA05g33860D,BnaC04g06110D,BnaA04g03690D,BnaC08g22200D,BnaA06g28830D,BnaA01g18470D,BnaA09g45770D,BnaC01g23800D,BnaC07g27850D,BnaA02g34760D,BnaC08g44890D,BnaA04g…
GO:0005743	mitochondrial inner membrane	cellular_component	41	39262	0.000454541	0.00101255	1.25892	BnaA08g27080D,BnaA04g04970D,BnaC09g40550D,BnaC03g70910D,BnaA03g30980D,BnaA02g10640D,BnaA08g23930D,BnaA05g13510D,BnaCnng24160D,BnaCnng32940D,BnaC08g13040D,BnaA04g28190D,BnaA09g48970D,BnaA09g07280D,BnaC08g43270D,BnaC02g07290D,BnaC09g28890D,BnaA08g15810D,BnaC09g43600D,BnaC01g01190D,BnaA10g19870D,BnaC09g07160D,BnaA08g00200D,BnaA02g03570D,BnaC02g14930D,BnaA02g01680D,BnaC01g18230D,BnaA01g35260D,BnaA05g…
GO:0016602	CCAAT-binding factor complex	cellular_component	40	39262	0.000135803	0.000314893	1.28534	BnaA06g16420D,BnaC02g21570D,BnaA09g44920D,BnaA05g09110D,BnaA07g17770D,BnaA02g16180D,BnaA08g26690D,BnaAnng22700D,BnaA06g05230D,BnaCnng30790D,BnaA10g29990D,BnaC03g41820D,BnaCnng06510D,BnaA09g26040D,BnaA01g29650D,BnaA03g35980D,BnaA09g48620D,BnaA06g01280D,BnaC03g05640D,BnaC08g20340D,BnaA02g01270D,BnaC06g10580D,BnaA07g30460D,BnaA08g00840D,BnaA03g04040D,BnaA07g22940D,BnaA05g19990D,BnaCnng15880D,BnaC08g…
GO:0030529	ribonucleoprotein complex	cellular_component	39	39262	0.0001795	0.000413302	1.28305	BnaA06g36080D,BnaC02g26240D,BnaC04g03230D,BnaA05g22630D,BnaC04g21140D,BnaC06g18980D,BnaC01g16790D,BnaC06g18630D,BnaA07g19460D,BnaA02g21230D,BnaA09g40190D,BnaA03g25240D,BnaA09g20820D,BnaC09g19270D,BnaA07g19720D,BnaA09g17920D,BnaA04g00320D,BnaA03g47020D,BnaC05g33830D,BnaC01g13870D,BnaA09g07860D,BnaC01g05670D,BnaA03g35090D,BnaA01g34740D,BnaC09g23090D,BnaC07g39200D,BnaA05g03650D,BnaC09g08020D,BnaA05g…
GO:0030126	COPI vesicle coat	cellular_component	37	39262	0.010285	0.0195927	1.18894	BnaC01g03930D,BnaC09g46600D,BnaC01g00490D,BnaCnng57320D,BnaA06g40470D,BnaA08g16430D,BnaC03g67560D,BnaA03g55100D,BnaC03g29080D,BnaC07g05510D,BnaC07g43280D,BnaA08g12450D,BnaA06g40500D,BnaC07g47060D,BnaC03g01910D,BnaC02g11860D,BnaC07g47030D,BnaA03g51530D,BnaA07g03550D,BnaA09g25890D,BnaC09g50230D,BnaAnng24960D,BnaA10g25260D,BnaA06g40490D,BnaA08g11170D,BnaA01g02670D,BnaC02g02500D,BnaC07g47070D,BnaC05g…
GO:0000139	Golgi membrane	cellular_component	35	39262	0.00210399	0.00440631	1.24003	BnaA01g02070D,BnaA06g23940D,BnaA06g32030D,BnaC07g45560D,BnaAnng30560D,BnaA09g07070D,BnaA03g53270D,BnaA04g24910D,BnaC05g09520D,BnaA06g40900D,BnaC07g24450D,BnaC03g25180D,BnaC03g49310D,BnaCnng34230D,BnaC01g03220D,BnaC04g50160D,BnaA04g01650D,BnaC08g16810D,BnaC08g38620D,BnaA06g10560D,BnaUnng00460D,BnaC04g48740D,BnaCnng31630D,BnaA04g11360D,BnaA09g37700D,BnaC09g06770D,BnaC05g12110D,BnaC08g48850D,BnaA08g…
GO:0005741	mitochondrial outer membrane	cellular_component	35	39262	0.0623559	0.099624	1.12467	BnaC03g12920D,BnaA05g19160D,BnaC03g48560D,BnaC07g31590D,BnaC03g32540D,BnaA03g27530D,BnaC09g07230D,BnaC09g03210D,BnaA10g29750D,BnaC02g39760D,BnaA02g31190D,BnaA02g02470D,BnaA09g07330D,BnaC09g32780D,BnaA03g35540D,BnaCnng52100D,BnaCnng42590D,BnaA06g28690D,BnaCnng69120D,BnaA01g25720D,BnaA10g11490D,BnaCnng35410D,BnaA05g37480D,BnaCnng35390D,BnaA06g25010D,BnaA09g52280D,BnaC04g20880D,BnaC07g28050D,BnaA03g…
GO:0005739	mitochondrion	cellular_component	32	39262	0.00122604	0.00262107	1.26331	BnaC09g20920D,BnaC01g20600D,BnaA06g09280D,BnaA02g26170D,BnaC08g16170D,BnaA03g48980D,BnaA02g26460D,BnaC03g30250D,BnaA09g01420D,BnaA06g34370D,BnaC07g21440D,BnaA01g16860D,BnaAnng38290D,BnaC02g34290D,BnaC07g41190D,BnaC02g34580D,BnaA03g25740D,BnaA04g19940D,BnaC05g17740D,BnaC08g05980D,BnaC07g13730D,BnaCnng44840D,BnaC04g44350D,BnaA03g09970D,BnaA05g09710D,BnaC05g10690D,BnaA08g20820D,BnaA07g10470D,BnaC03g…
GO:0016592	mediator complex	cellular_component	32	39262	0.00122604	0.00262107	1.26331	BnaA10g15290D,BnaC05g47070D,BnaA03g07970D,BnaAnng18420D,BnaCnng05620D,BnaC05g12530D,BnaA07g13720D,BnaC03g32110D,BnaA07g09420D,BnaA10g26710D,BnaCnng02320D,BnaC09g37710D,BnaA06g00390D,BnaC05g20130D,BnaC05g51820D,BnaA05g36640D,BnaC02g03270D,BnaC07g12340D,BnaC03g10030D,BnaA09g51930D,BnaC06g07220D,BnaA03g27110D,BnaA05g13810D,BnaC05g48810D,BnaA02g04580D,BnaA05g33870D,BnaAnng10600D,BnaC06g10880D,BnaC04g…
GO:0005945	6-phosphofructokinase complex	cellular_component	32	39262	0.0044246	0.0087957	1.22822	BnaA08g21540D,BnaA07g32860D,BnaC01g05570D,BnaA03g40360D,BnaA01g07610D,BnaAnng29210D,BnaC01g35030D,BnaA03g10690D,BnaA06g35220D,BnaC02g36920D,BnaC05g50320D,BnaC07g31330D,BnaA01g04110D,BnaC08g41630D,BnaC09g33200D,BnaA06g38560D,BnaC01g09280D,BnaA09g42580D,BnaA01g15420D,BnaA06g08370D,BnaC02g12110D,BnaC03g13370D,BnaC09g22950D,BnaC07g20530D,BnaA10g10800D,BnaC05g09740D,BnaC06g37390D,BnaC07g09630D,BnaC01g…
GO:0016272	prefoldin complex	cellular_component	31	39262	3.2e-05	7.65e-05	1.33856	BnaA09g26520D,BnaA03g13030D,BnaC03g42820D,BnaA09g03370D,BnaC07g12330D,BnaC09g02730D,BnaA10g02120D,BnaC04g46510D,BnaC07g27230D,BnaA07g09420D,BnaA05g17160D,BnaC05g02030D,BnaC05g06370D,BnaA06g29490D,BnaC08g03030D,BnaA07g07500D,BnaA09g05390D,BnaC07g09280D,BnaC05g29990D,BnaCnng50130D,BnaC02g42210D,BnaA08g26790D,BnaC05g22930D,BnaC09g04930D,BnaAnng36430D,BnaA06g26020D,BnaA06g05100D,BnaC09g28060D,BnaC03g…
GO:0005681	spliceosomal complex	cellular_component	31	39262	0.360256	0.458407	1.01986	BnaC06g37910D,BnaC04g06620D,BnaA05g06360D,BnaA03g32720D,BnaCnng61100D,BnaC08g04400D,BnaA08g27340D,BnaC04g45940D,BnaC03g03450D,BnaCnng51390D,BnaA01g10280D,BnaC07g03070D,BnaA05g26100D,BnaA07g01560D,BnaCnng22610D,BnaA01g29940D,BnaA10g23070D,BnaA06g25120D,BnaC08g45770D,BnaC09g47620D,BnaC01g41280D,BnaA04g18070D,BnaC01g37840D,BnaC05g40200D,BnaC03g74600D,BnaA02g18520D,BnaC03g44770D,BnaA09g50970D,BnaA07g…
GO:0048500	signal recognition particle	cellular_component	30	39262	0.000422882	0.000948455	1.29538	BnaA07g24930D,BnaA06g19200D,BnaA05g03460D,BnaC06g28700D,BnaA08g02950D,BnaC03g24370D,BnaC02g02830D,BnaA06g16170D,BnaC04g49120D,BnaCnng77880D,BnaAnng00870D,BnaC05g11610D,BnaA10g26220D,BnaA04g25260D,BnaA07g26580D,BnaA06g03460D,BnaA08g03500D,BnaC06g01660D,BnaAnng26360D,BnaC08g03210D,BnaC08g03850D,BnaCnng10600D,BnaA06g09990D,BnaC06g02320D,BnaC06g26630D,BnaCnng63570D,BnaAnng40040D,BnaA03g20350D,BnaC08g…
GO:0005667	transcription factor complex	cellular_component	29	39262	0.0027375	0.00564674	1.2522	BnaC03g19870D,BnaC03g10740D,BnaC04g09260D,BnaC08g04110D,BnaC05g37870D,BnaA02g02400D,BnaA03g00880D,BnaA03g08420D,BnaA03g54820D,BnaC03g01210D,BnaA03g16490D,BnaA10g27090D,BnaC02g03120D,BnaAnng14930D,BnaC01g43490D,BnaAnng07700D,BnaA10g14120D,BnaA08g03620D,BnaA10g26580D,BnaCnng63530D,BnaC02g05860D,BnaAnng27940D,BnaCnng02820D,BnaC03g00770D,BnaCnng65490D,BnaA05g08240D,BnaCnng03510D,BnaC05g48730D,BnaA05g…
GO:0005779	integral component of peroxisomal membrane	cellular_component	29	39262	0.00913517	0.0175652	1.21426	BnaC05g25550D,BnaA05g17730D,BnaCnng08920D,BnaA03g28570D,BnaC03g25430D,BnaA09g40210D,BnaC08g32960D,BnaA01g26950D,BnaA04g26380D,BnaAnng11100D,BnaCnng15230D,BnaC04g04450D,BnaC01g34440D,BnaA08g03650D,BnaA03g56960D,BnaC03g40420D,BnaC03g69990D,BnaC05g47260D,BnaC04g50420D,BnaC01g18550D,BnaCnng64690D,BnaA06g03610D,BnaA07g18900D,BnaC07g04030D,BnaAnng35490D,BnaC03g33710D,BnaA09g40520D,BnaA05g33000D,BnaCnng…
GO:0005744	mitochondrial inner membrane presequence translocase complex	cellular_component	29	39262	0.238434	0.322091	1.05449	BnaCnng48140D,BnaC06g17250D,BnaA05g07100D,BnaC03g70910D,BnaA09g37660D,BnaA03g03460D,BnaA05g13510D,BnaA09g34530D,BnaC07g27840D,BnaC03g04950D,BnaA02g16120D,BnaA07g18290D,BnaA03g17200D,BnaC07g00350D,BnaC04g23130D,BnaC02g46290D,BnaA08g00200D,BnaAnng20480D,BnaC04g07900D,BnaA09g10320D,BnaC08g48900D,BnaC06g33890D,BnaA04g01690D,BnaA06g28840D,BnaA07g00370D,BnaA06g39090D,BnaC06g11160D,BnaC09g10480D,BnaA07g…
GO:0030118	clathrin coat	cellular_component	29	39262	0.951197	1	0.834803	BnaC08g00120D,BnaC07g10870D,BnaC01g06220D,BnaA02g08290D,BnaA10g11240D,BnaC05g03060D,BnaC02g34010D,BnaA02g25770D,BnaA09g23660D,BnaC05g11150D,BnaC04g37710D,BnaA06g09690D,BnaC09g53320D,BnaC05g50410D,BnaC05g10880D,BnaC07g20930D,BnaAnng36220D,BnaA09g18730D,BnaA04g14860D,BnaC08g33460D,BnaA01g04700D,BnaA01g15110D,BnaAnng12440D,BnaA06g34790D,BnaC01g17840D,BnaC08g08040D,BnaA09g40960D,BnaA07g37210D,BnaC09g…
GO:0030127	COPII vesicle coat	cellular_component	27	39262	0.00101948	0.00220239	1.28645	BnaA06g39000D,BnaA05g30470D,BnaCnng01340D,BnaC04g29030D,BnaA09g43020D,BnaC08g49290D,BnaC05g44870D,BnaC09g00930D,BnaA03g29840D,BnaC03g59930D,BnaC08g01290D,BnaC05g13980D,BnaC03g35080D,BnaC04g16860D,BnaA06g36610D,BnaA08g17130D,BnaA09g00370D,BnaA04g15870D,BnaA08g28280D,BnaA01g04360D,BnaA01g32450D,BnaC07g17260D,BnaC03g74920D,BnaC04g39130D,BnaC01g05820D,BnaA07g13220D,BnaA04g06220D
GO:0042651	thylakoid membrane	cellular_component	27	39262	0.014639	0.0269502	1.20345	BnaC03g50210D,BnaA09g26030D,BnaCnng20740D,BnaC09g00580D,BnaA07g20510D,BnaA02g34830D,BnaC05g23490D,BnaC08g19150D,BnaAnng14750D,BnaC09g08190D,BnaA09g19760D,BnaC06g20160D,BnaC07g14870D,BnaC02g25420D,BnaAnng40550D,BnaC09g21770D,BnaC09g06210D,BnaA06g37650D,BnaA03g25710D,BnaC03g30230D,BnaA09g06690D,BnaC06g39450D,BnaAnng27100D,BnaA09g08030D,BnaC02g42890D,BnaA09g01470D,BnaA06g23190D
GO:0005730	nucleolus	cellular_component	26	39262	0.0184587	0.0330568	1.19751	BnaC02g26240D,BnaA03g04950D,BnaC03g06550D,BnaA08g03640D,BnaC06g01190D,BnaA02g21230D,BnaA03g01910D,BnaA03g25240D,BnaA09g20820D,BnaA05g14810D,BnaC01g13870D,BnaC06g09920D,BnaC06g06010D,BnaC06g09750D,BnaA03g02380D,BnaA06g01710D,BnaC09g47740D,BnaC03g03400D,BnaC09g23090D,BnaAnng06240D,BnaC03g02430D,BnaC03g29670D,BnaA01g12190D,BnaC02g01270D,BnaA10g28620D,BnaA10g23170D
GO:0030132	clathrin coat of coated pit	cellular_component	26	39262	0.0884193	0.135598	1.12267	BnaA04g05890D,BnaC04g05360D,BnaC09g19520D,BnaA03g31580D,BnaC03g37080D,BnaA06g40410D,BnaA01g31170D,BnaA02g36610D,BnaC07g19340D,BnaC06g11400D,BnaC05g42030D,BnaA09g43610D,BnaC02g32570D,BnaA01g31000D,BnaC03g35690D,BnaA04g22660D,BnaA03g18820D,BnaC04g56740D,BnaA05g05580D,BnaC03g72300D,BnaC08g36210D,BnaA03g30360D,BnaA02g36830D,BnaA05g27850D,BnaA09g18080D,BnaC04g28510D
GO:0000502	proteasome complex	cellular_component	25	39262	0.00022279	0.000509412	1.3286	BnaA01g08440D,BnaA07g32250D,BnaA07g00430D,BnaA06g17980D,BnaA08g13700D,BnaCnng26770D,BnaC04g12080D,BnaCnng48550D,BnaA02g18360D,BnaC07g00290D,BnaC08g13070D,BnaC06g36630D,BnaA07g11600D,BnaCnng77420D,BnaCnng07150D,BnaC07g41330D,BnaC08g23210D,BnaC01g09980D,BnaA03g15060D,BnaC04g43310D,BnaC03g18080D,BnaAnng17060D,BnaA03g49280D,BnaA04g19020D,BnaA08g21890D
GO:0005787	signal peptidase complex	cellular_component	25	39262	0.00022279	0.000509412	1.3286	BnaC04g05410D,BnaA02g31150D,BnaA03g56570D,BnaC02g43720D,BnaC03g34180D,BnaA04g22730D,BnaC09g03160D,BnaC01g00920D,BnaC05g27940D,BnaA05g31930D,BnaC04g46750D,BnaC03g22370D,BnaCnng66690D,BnaA01g00010D,BnaC02g39710D,BnaC05g46540D,BnaA09g42640D,BnaA06g28750D,BnaC04g46760D,BnaC04g05400D,BnaA05g05630D,BnaA05g18350D,BnaC08g35120D,BnaA04g22720D,BnaC03g22320D
GO:0015629	actin cytoskeleton	cellular_component	24	39262	0.861282	0.940205	0.87268	BnaC03g11510D,BnaA10g12850D,BnaC05g00330D,BnaA03g39200D,BnaA03g39180D,BnaA05g11500D,BnaC03g11520D,BnaA01g02250D,BnaC04g13550D,BnaC07g45300D,BnaA05g20830D,BnaA06g18240D,BnaC05g33510D,BnaA09g51810D,BnaA03g09180D,BnaCnng02190D,BnaC03g55630D,BnaC03g46510D,BnaA03g09190D,BnaC01g03520D,BnaA02g06680D,BnaA10g00250D,BnaC09g35260D,BnaCnng08860D
GO:0005801	cis-Golgi network	cellular_component	23	39262	0	0	1.38174	BnaCnng03550D,BnaC02g22170D,BnaAnng30560D,BnaA08g02090D,BnaA10g27220D,BnaC03g00670D,BnaA06g02480D,BnaC05g09520D,BnaC06g04400D,BnaC03g25180D,BnaC03g77750D,BnaC02g22180D,BnaC04g50160D,BnaC08g16810D,BnaC06g34370D,BnaC08g38620D,BnaA03g54920D,BnaA06g10560D,BnaA07g30870D,BnaC05g12110D,BnaA03g21120D,BnaA09g56530D,BnaA08g23720D
GO:0009538	photosystem I reaction center	cellular_component	22	39262	0.0167239	0.0302798	1.21593	BnaA09g25260D,BnaA01g28200D,BnaA05g23550D,BnaC01g09730D,BnaA06g01680D,BnaA08g04820D,BnaC06g41070D,BnaA09g01080D,BnaC08g09180D,BnaA07g06900D,BnaC04g55930D,BnaC08g05450D,BnaA08g01590D,BnaC03g69350D,BnaC05g37250D,BnaC05g25250D,BnaA04g07250D,BnaC09g00220D,BnaA01g08150D,BnaC08g13230D,BnaA08g07940D,BnaA08g30780D
GO:0005759	mitochondrial matrix	cellular_component	22	39262	0.793346	0.878531	0.894069	BnaA04g24010D,BnaA10g24520D,BnaA03g01820D,BnaC06g40260D,BnaC04g55580D,BnaA03g51840D,BnaA01g04430D,BnaA07g35360D,BnaCnng03730D,BnaA06g10550D,BnaA05g05770D,BnaA10g27400D,BnaC05g12100D,BnaC01g05870D,BnaC04g05630D,BnaC01g05640D,BnaC07g43600D,BnaC03g00540D,BnaC04g47770D,BnaA03g54960D,BnaA04g03470D,BnaC09g49410D
GO:0031227	intrinsic component of endoplasmic reticulum membrane	cellular_component	21	39262	0.8245	0.907281	0.879291	BnaC08g26760D,BnaA06g32200D,BnaC02g05790D,BnaC07g24190D,BnaC02g28490D,BnaCnng09180D,BnaA08g23440D,BnaC05g12910D,BnaA01g02800D,BnaC02g23210D,BnaAnng15970D,BnaA02g02330D,BnaC05g00060D,BnaA02g28820D,BnaC02g07380D,BnaCnng16160D,BnaA10g00040D,BnaA09g35400D,BnaA02g19840D,BnaA06g11370D,BnaC08g17100D
GO:0005742	mitochondrial outer membrane translocase complex	cellular_component	20	39262	0.00112301	0.00241653	1.31595	BnaA07g08810D,BnaCnng43990D,BnaC09g12290D,BnaC04g33830D,BnaUnng00560D,BnaC09g11950D,BnaA04g11290D,BnaA02g28590D,BnaC06g13590D,BnaA04g11870D,BnaC02g36640D,BnaA08g19020D,BnaCnng11090D,BnaUnng00170D,BnaA09g12040D,BnaA09g27920D,BnaC03g57640D,BnaC07g11430D,BnaC05g21320D,BnaA09g11500D
GO:0005746	mitochondrial respiratory chain	cellular_component	20	39262	0.13905	0.203719	1.10539	BnaC04g00250D,BnaC06g18510D,BnaC08g32200D,BnaA03g58550D,BnaA04g10250D,BnaC03g26030D,BnaA07g19310D,BnaC03g64400D,BnaC07g36560D,BnaC01g12490D,BnaA09g39850D,BnaC08g34980D,BnaC07g31170D,BnaC04g32470D,BnaA03g40110D,BnaC04g51340D,BnaA01g11000D,BnaA03g21760D,BnaC08g26350D,BnaA08g09830D
GO:0042555	MCM complex	cellular_component	19	39262	0.0101303	0.019343	1.25015	BnaC03g31160D,BnaC02g32200D,BnaCnng58270D,BnaA02g24390D,BnaA10g27860D,BnaC06g00930D,BnaAnng10190D,BnaC03g46410D,BnaCnng57480D,BnaA03g26370D,BnaCnng01120D,BnaC08g46630D,BnaCnng62610D,BnaA08g04370D,BnaA09g00540D,BnaA06g36070D,BnaA03g38130D,BnaA03g39110D,BnaC03g74400D
GO:0030130	clathrin coat of trans-Golgi network vesicle	cellular_component	19	39262	0.27195	0.359074	1.05012	BnaA04g05890D,BnaC04g05360D,BnaA03g31580D,BnaC03g37080D,BnaA01g31170D,BnaC06g11400D,BnaC05g42030D,BnaA09g43610D,BnaA01g31000D,BnaC03g35690D,BnaA04g22660D,BnaA03g18820D,BnaC04g56740D,BnaA05g05580D,BnaC03g72300D,BnaC08g36210D,BnaA03g30360D,BnaA05g27850D,BnaC04g28510D
GO:0005853	eukaryotic translation elongation factor 1 complex	cellular_component	19	39262	0.394355	0.487826	1.00974	BnaA09g26350D,BnaC09g44570D,BnaCnng34540D,BnaC08g42630D,BnaC08g13770D,BnaC03g09630D,BnaA08g17480D,BnaC09g38180D,BnaC02g08760D,BnaA10g15620D,BnaA09g26340D,BnaA02g04260D,BnaA08g26240D,BnaCnng17800D,BnaA10g20560D,BnaCnng19790D,BnaA09g48380D,BnaA06g05540D,BnaA03g07610D
GO:0070461	SAGA-type complex	cellular_component	18	39262	0.0134065	0.0247088	1.24357	BnaA08g12470D,BnaA01g05800D,BnaA03g38720D,BnaC08g33970D,BnaC01g07070D,BnaC07g15900D,BnaA04g14420D,BnaA09g07370D,BnaC03g45530D,BnaA03g51500D,BnaC07g04750D,BnaA03g50700D,BnaA09g41350D,BnaC03g67600D,BnaC04g36380D,BnaCnng22340D,BnaC07g44580D,BnaC09g07290D
GO:0005680	anaphase-promoting complex	cellular_component	18	39262	0.0445296	0.0733533	1.18435	BnaA06g28240D,BnaAnng01380D,BnaAnng14950D,BnaA06g16860D,BnaCnng59940D,BnaA01g11370D,BnaC03g02160D,BnaC02g02260D,BnaC01g12830D,BnaC06g01420D,BnaA07g00700D,BnaCnng12060D,BnaC07g28650D,BnaCnng69880D,BnaA06g25330D,BnaC07g00040D,BnaAnng14940D,BnaA03g01610D
GO:0005887	integral component of plasma membrane	cellular_component	18	39262	0.312543	0.40398	1.03631	BnaA07g23350D,BnaC07g13570D,BnaC08g42460D,BnaA02g26600D,BnaA07g29680D,BnaC02g20830D,BnaA09g30430D,BnaA09g57200D,BnaA06g05900D,BnaC06g32880D,BnaC05g17970D,BnaC05g49240D,BnaC02g34840D,BnaA02g15620D,BnaA07g10320D,BnaC07g21980D,BnaCnng07770D,BnaA06g33960D
GO:0005956	protein kinase CK2 complex	cellular_component	17	39262	0	0	1.38174	BnaA05g04230D,BnaC03g24910D,BnaA09g38340D,BnaC07g34490D,BnaA01g08530D,BnaA03g20850D,BnaC06g42820D,BnaC04g05080D,BnaC02g33100D,BnaA04g10920D,BnaA03g43190D,BnaA06g35590D,BnaCnng44870D,BnaC08g30500D,BnaC07g19930D,BnaA02g24960D,BnaC01g10230D
GO:0009317	acetyl-CoA carboxylase complex	cellular_component	17	39262	0.00296374	0.00600788	1.30498	BnaA03g17570D,BnaC06g34180D,BnaA03g06000D,BnaC02g06560D,BnaA10g18680D,BnaC03g07000D,BnaC05g37990D,BnaAnng22560D,BnaA03g05470D,BnaA05g06620D,BnaC03g21010D,BnaC09g42420D,BnaC04g07230D,BnaC09g27620D,BnaA10g13960D,BnaC09g27690D,BnaC03g07750D
GO:0005960	glycine cleavage complex	cellular_component	17	39262	0.0177073	0.031815	1.2363	BnaA07g21510D,BnaA09g24310D,BnaAnng15720D,BnaC05g24600D,BnaA03g16100D,BnaC06g36620D,BnaC05g28570D,BnaC06g22020D,BnaC03g19300D,BnaA07g32240D,BnaC03g10880D,BnaC04g10230D,BnaA05g08820D,BnaA01g36150D,BnaA05g18150D,BnaAnng37640D,BnaC08g07440D
GO:0005740	mitochondrial envelope	cellular_component	17	39262	0.0564145	0.0903071	1.17448	BnaA04g05280D,BnaA05g23920D,BnaC05g37720D,BnaAnng26290D,BnaC01g35930D,BnaC03g39200D,BnaA05g23900D,BnaCnng60170D,BnaC08g23930D,BnaA01g37030D,BnaC01g35940D,BnaC03g39210D,BnaA05g23910D,BnaC05g37710D,BnaA05g23890D,BnaC04g27940D,BnaA09g33140D
GO:0005669	transcription factor TFIID complex	cellular_component	17	39262	0.127724	0.187648	1.11855	BnaC05g13560D,BnaA06g11720D,BnaA09g45000D,BnaC02g30110D,BnaC08g37750D,BnaA02g36640D,BnaAnng35590D,BnaA06g36870D,BnaA02g36700D,BnaA01g31990D,BnaC05g42960D,BnaA06g00420D,BnaC07g16890D,BnaA07g36550D,BnaA05g13850D,BnaAnng16580D,BnaC06g07180D
GO:0005795	Golgi stack	cellular_component	17	39262	0.231174	0.314351	1.06771	BnaA10g27620D,BnaA05g29310D,BnaA04g21840D,BnaA05g06500D,BnaA01g30130D,BnaC04g07170D,BnaCnng24210D,BnaC01g38080D,BnaAnng27210D,BnaA03g38040D,BnaC01g38090D,BnaCnng03910D,BnaC01g39240D,BnaC03g74310D,BnaCnng18920D,BnaC03g76900D,BnaCnng55220D
GO:0032040	small-subunit processome	cellular_component	17	39262	0.231174	0.314351	1.06771	BnaCnng40370D,BnaA03g25610D,BnaC02g27370D,BnaC09g52780D,BnaC03g30050D,BnaA02g36530D,BnaCnng40350D,BnaA02g03250D,BnaC08g30590D,BnaA02g35820D,BnaA04g27370D,BnaA09g38450D,BnaC02g06840D,BnaA10g17720D,BnaC04g55100D,BnaC09g41090D,BnaC02g21500D
GO:0005886	plasma membrane	cellular_component	17	39262	0.356947	0.454548	1.02129	BnaA10g29800D,BnaC04g15380D,BnaC09g09190D,BnaA07g03250D,BnaA09g32350D,BnaA10g29810D,BnaA02g01840D,BnaA03g04470D,BnaC08g23120D,BnaA06g29260D,BnaA09g08920D,BnaC03g06010D,BnaA02g22910D,BnaC09g02780D,BnaC07g27450D,BnaC02g04980D,BnaA09g03480D
GO:0031461	cullin-RING ubiquitin ligase complex	cellular_component	17	39262	0.984408	1	0.734051	BnaAnng00170D,BnaC03g30850D,BnaA03g26120D,BnaA09g17890D,BnaCnng12340D,BnaC09g19210D,BnaC04g32030D,BnaC07g18980D,BnaA09g00890D,BnaA06g36120D,BnaC04g26900D,BnaC02g32140D,BnaA02g24350D,BnaC09g00020D,BnaC05g50950D,BnaA08g19930D,BnaA09g29300D
GO:0009331	glycerol-3-phosphate dehydrogenase complex	cellular_component	16	39262	0.0233376	0.0407725	1.22822	BnaA05g29950D,BnaC01g38650D,BnaA03g19520D,BnaA07g35610D,BnaA04g23450D,BnaC05g44270D,BnaC04g01960D,BnaC06g42250D,BnaA05g02270D,BnaC04g32730D,BnaC04g47330D,BnaC05g42730D,BnaC03g23410D,BnaA05g28450D,BnaA01g31820D,BnaA07g15060D
GO:0000922	spindle pole	cellular_component	16	39262	0.66452	0.762367	0.921162	BnaCnng60160D,BnaAnng01810D,BnaC02g11680D,BnaC03g08450D,BnaC02g23240D,BnaA10g24280D,BnaC03g57230D,BnaC02g22120D,BnaC08g24770D,BnaA10g17310D,BnaA06g17130D,BnaA03g06600D,BnaA09g33980D,BnaC06g19080D,BnaC02g01880D,BnaA02g19880D
GO:0005815	microtubule organizing center	cellular_component	16	39262	0.66452	0.762367	0.921162	BnaCnng60160D,BnaAnng01810D,BnaC02g11680D,BnaC03g08450D,BnaC02g23240D,BnaA10g24280D,BnaC03g57230D,BnaC02g22120D,BnaC08g24770D,BnaA10g17310D,BnaA06g17130D,BnaA03g06600D,BnaA09g33980D,BnaC06g19080D,BnaC02g01880D,BnaA02g19880D
GO:0017119	Golgi transport complex	cellular_component	15	39262	0.00565973	0.0111432	1.29538	BnaC03g05220D,BnaAnng25250D,BnaC09g27840D,BnaC06g29100D,BnaA07g26710D,BnaA09g25150D,BnaA09g24960D,BnaC06g00500D,BnaA10g08010D,BnaC02g04160D,BnaA02g11250D,BnaA03g03730D,BnaC02g15820D,BnaC06g26230D,BnaA10g07980D
GO:0030915	Smc5-Smc6 complex	cellular_component	15	39262	0.00565973	0.0111432	1.29538	BnaC05g38470D,BnaA10g14460D,BnaA06g02500D,BnaA05g24440D,BnaA03g05760D,BnaC02g01490D,BnaAnng27900D,BnaC06g04350D,BnaC03g07480D,BnaAnng06390D,BnaCnng35070D,BnaAnng27890D,BnaA03g40230D,BnaC07g49890D,BnaA05g15490D
GO:0035267	NuA4 histone acetyltransferase complex	cellular_component	15	39262	0.00565973	0.0111432	1.29538	BnaC06g20180D,BnaC06g39430D,BnaA04g26950D,BnaC02g25410D,BnaC02g02630D,BnaA07g38490D,BnaA07g34590D,BnaA05g00690D,BnaA03g01340D,BnaAnng01010D,BnaC03g01690D,BnaC04g52380D,BnaA02g36220D,BnaC04g51430D,BnaC04g27420D
GO:0019867	outer membrane	cellular_component	15	39262	0.0306855	0.0521147	1.21919	BnaA03g31550D,BnaC03g37050D,BnaC03g56080D,BnaA10g24940D,BnaA10g15530D,BnaA06g17900D,BnaC09g49870D,BnaA01g19970D,BnaC01g24790D,BnaC05g42070D,BnaA05g27880D,BnaC09g38070D,BnaA10g15540D,BnaC03g54580D,BnaA06g38920D
GO:0005834	heterotrimeric G-protein complex	cellular_component	14	39262	0	0	1.38174	BnaA10g14860D,BnaA03g36890D,BnaA01g24300D,BnaAnng12540D,BnaC03g10200D,BnaCnng55440D,BnaC08g32820D,BnaC04g20670D,BnaC03g43060D,BnaC09g37230D,BnaC03g21630D,BnaA03g56070D,BnaA02g05000D,BnaA09g40380D
GO:0031966	mitochondrial membrane	cellular_component	14	39262	0	0	1.38174	BnaC04g49670D,BnaA02g07340D,BnaC06g42530D,BnaCnng68140D,BnaA08g17120D,BnaA07g16280D,BnaA04g04340D,BnaA10g29330D,BnaA04g25760D,BnaC09g34250D,BnaA08g07650D,BnaC08g24950D,BnaA09g34030D,BnaC02g10400D
GO:0000228	nuclear chromosome	cellular_component	14	39262	0.040242	0.0667586	1.20903	BnaA02g03030D,BnaC04g23000D,BnaC05g35950D,BnaA03g05900D,BnaA10g18050D,BnaC02g06490D,BnaC08g29760D,BnaA05g22680D,BnaA04g10640D,BnaA09g37900D,BnaC06g13250D,BnaC03g07660D,BnaC09g41550D,BnaC04g32940D
GO:0043231	intracellular membrane-bounded organelle	cellular_component	14	39262	0.040242	0.0667586	1.20903	BnaA09g51510D,BnaC06g31170D,BnaC01g28440D,BnaA07g09080D,BnaA10g07790D,BnaA01g22040D,BnaC07g12860D,BnaA07g28560D,BnaC09g28080D,BnaA10g00730D,BnaCnng19750D,BnaC08g46110D,BnaC05g00810D,BnaA09g29700D
GO:0000439	core TFIIH complex	cellular_component	14	39262	0.224145	0.305551	1.07469	BnaC08g01210D,BnaA08g28170D,BnaC05g09430D,BnaCnng26250D,BnaC05g14080D,BnaA04g11110D,BnaA02g14670D,BnaA06g12490D,BnaA01g18010D,BnaA06g08180D,BnaC08g17910D,BnaCnng34010D,BnaA08g22660D,BnaC01g21290D
GO:0000015	phosphopyruvate hydratase complex	cellular_component	13	39262	0.0108079	0.0202835	1.28305	BnaC08g24110D,BnaA05g07770D,BnaC04g08780D,BnaC03g20200D,BnaA05g12480D,BnaA07g17450D,BnaC06g34880D,BnaA05g34310D,BnaA03g16750D,BnaAnng30290D,BnaAnng21140D,BnaC04g54450D,BnaA07g31190D
GO:0005971	ribonucleoside-diphosphate reductase complex	cellular_component	13	39262	0.416968	0.514636	0.997926	BnaCnng78700D,BnaC07g48980D,BnaC02g36630D,BnaA06g32440D,BnaC07g18690D,BnaA08g16560D,BnaA07g06360D,BnaAnng05810D,BnaC03g60540D,BnaA01g18560D,BnaA02g28570D,BnaC07g07940D,BnaC08g37570D
GO:0005885	Arp2/3 protein complex	cellular_component	12	39262	0	0	1.38174	BnaA09g14200D,BnaC03g56850D,BnaA09g01850D,BnaA06g07560D,BnaC07g49030D,BnaC04g29040D,BnaC09g14740D,BnaA04g06240D,BnaC05g09010D,BnaA06g32490D,BnaA08g24380D,BnaC09g01290D
GO:0008352	katanin complex	cellular_component	12	39262	0.014935	0.0271907	1.27546	BnaA09g47720D,BnaC07g30810D,BnaC02g07280D,BnaC08g42170D,BnaA02g03560D,BnaA01g35940D,BnaC03g03550D,BnaC01g29290D,BnaA07g32880D,BnaCnng04090D,BnaA06g26170D,BnaA03g55700D
GO:0031012	extracellular matrix	cellular_component	12	39262	0.0685885	0.107904	1.18435	BnaA09g14350D,BnaA05g04520D,BnaA07g23960D,BnaA09g29750D,BnaC09g14910D,BnaC04g03940D,BnaC06g24850D,BnaA01g17120D,BnaC05g19230D,BnaA07g28710D,BnaC06g31300D,BnaA03g42770D
GO:0009360	DNA polymerase III complex	cellular_component	12	39262	0.315754	0.405233	1.03631	BnaA03g46930D,BnaAnng16990D,BnaA01g09650D,BnaC07g18620D,BnaC07g21790D,BnaAnng05750D,BnaC09g18610D,BnaC07g39110D,BnaA06g09290D,BnaA06g34110D,BnaC01g11310D,BnaC05g10740D
GO:0009579	thylakoid	cellular_component	12	39262	0.315754	0.405233	1.03631	BnaC05g32150D,BnaC09g27670D,BnaC09g27640D,BnaA10g13980D,BnaC04g15560D,BnaC09g27530D,BnaC01g21770D,BnaC04g15570D,BnaC05g32140D,BnaC09g27540D,BnaA10g14010D,BnaA05g00900D
GO:0005750	mitochondrial respiratory chain complex III	cellular_component	11	39262	0	0	1.38174	BnaA04g05280D,BnaA01g04540D,BnaA08g12190D,BnaC01g06030D,BnaC08g23930D,BnaC02g40580D,BnaAnng34010D,BnaC03g67290D,BnaC04g27940D,BnaA09g33140D,BnaA02g31990D
GO:0030173	integral component of Golgi membrane	cellular_component	11	39262	0.211996	0.290192	1.08566	BnaA06g04720D,BnaA06g19100D,BnaC08g43040D,BnaC01g25790D,BnaC05g05950D,BnaA01g26730D,BnaA09g48780D,BnaC01g34130D,BnaA05g21680D,BnaC05g34730D,BnaC03g52740D
GO:0005672	transcription factor TFIIA complex	cellular_component	11	39262	0.679912	0.778395	0.894069	BnaC07g38900D,BnaC08g11660D,BnaA09g49410D,BnaA08g28950D,BnaC05g05210D,BnaA08g14710D,BnaC08g45360D,BnaA01g35130D,BnaC08g02230D,BnaA03g46710D,BnaC01g41540D
GO:0016471	vacuolar proton-transporting V-type ATPase complex	cellular_component	11	39262	0.679912	0.778395	0.894069	BnaA08g31200D,BnaC02g21910D,BnaA03g27500D,BnaA05g33890D,BnaA03g58730D,BnaCnng05660D,BnaC01g15530D,BnaC07g38430D,BnaC05g48790D,BnaC03g32500D,BnaC07g01020D
GO:0032777	Piccolo NuA4 histone acetyltransferase complex	cellular_component	10	39262	0	0	1.38174	BnaC06g20180D,BnaC06g39430D,BnaC02g25410D,BnaC02g02630D,BnaA07g38490D,BnaA07g34590D,BnaA03g01340D,BnaAnng01010D,BnaC03g01690D,BnaA02g36220D
GO:0005852	eukaryotic translation initiation factor 3 complex	cellular_component	10	39262	0.115206	0.169968	1.15145	BnaC07g44180D,BnaC01g04940D,BnaA03g52440D,BnaC08g27050D,BnaA08g11850D,BnaA02g11620D,BnaA01g03600D,BnaC04g55530D,BnaC03g66710D,BnaA09g35610D
GO:0031011	Ino80 complex	cellular_component	10	39262	0.115206	0.169968	1.15145	BnaA03g08480D,BnaC02g09460D,BnaC03g48680D,BnaA02g05570D,BnaC05g38040D,BnaC03g55710D,BnaC03g10810D,BnaC09g07130D,BnaA06g24900D,BnaA10g14040D
GO:0046540	U4/U6 x U5 tri-snRNP complex	cellular_component	10	39262	0.597412	0.696063	0.921162	BnaCnng08830D,BnaA08g18640D,BnaCnng16430D,BnaC01g43100D,BnaCnng78220D,BnaCnng56480D,BnaC03g58240D,BnaCnng56490D,BnaC04g18530D,BnaA01g22230D
GO:0005819	spindle	cellular_component	9	39262	0.313798	0.40398	1.03631	BnaA04g08060D,BnaC05g02060D,BnaC04g34530D,BnaA09g50840D,BnaA02g02650D,BnaC08g45490D,BnaC02g06090D,BnaA10g02140D,BnaUnng00060D
GO:0008250	oligosaccharyltransferase complex	cellular_component	9	39262	0.660935	0.759845	0.888263	BnaC03g64370D,BnaA05g16320D,BnaC03g10490D,BnaA03g58520D,BnaA09g24550D,BnaC07g36590D,BnaA01g11060D,BnaC01g12560D,BnaCnng43870D
GO:0005849	mRNA cleavage factor complex	cellular_component	9	39262	0.787982	0.875433	0.829046	BnaA03g47500D,BnaC01g08640D,BnaA01g14790D,BnaA01g07160D,BnaC07g39750D,BnaC08g47260D,BnaC07g08330D,BnaC01g17430D,BnaA08g30980D
GO:0000785	chromatin	cellular_component	8	39262	0	0	1.38174	BnaC08g03490D,BnaC01g34520D,BnaA06g34780D,BnaC05g25770D,BnaC06g02150D,BnaC07g20940D,BnaA08g03140D,BnaA09g18740D
GO:0005664	nuclear origin of replication recognition complex	cellular_component	8	39262	0	0	1.38174	BnaA08g19940D,BnaA09g29310D,BnaC05g16180D,BnaA09g23030D,BnaCnng12350D,BnaC05g50940D,BnaA10g17810D,BnaC09g41200D
GO:0009707	chloroplast outer membrane	cellular_component	8	39262	0	0	1.38174	BnaA10g25270D,BnaA10g00950D,BnaC03g01900D,BnaA09g51430D,BnaC09g50250D,BnaA03g55090D,BnaC05g01070D,BnaC08g49740D
GO:0030904	retromer complex	cellular_component	8	39262	0	0	1.38174	BnaC01g20340D,BnaA02g10230D,BnaC01g44450D,BnaA06g03740D,BnaCnng76240D,BnaC02g14200D,BnaA10g06820D,BnaAnng13820D
GO:0045252	oxoglutarate dehydrogenase complex	cellular_component	8	39262	0	0	1.38174	BnaC02g13370D,BnaA02g09300D,BnaA03g11590D,BnaA08g25090D,BnaA10g09340D,BnaC09g31840D,BnaC03g14380D,BnaC08g15120D
GO:0009521	photosystem	cellular_component	8	39262	0.0544558	0.0874271	1.22822	BnaC05g32120D,BnaC03g60960D,BnaC09g27520D,BnaC04g24900D,BnaC04g29390D,BnaC05g32130D,BnaA06g19420D,BnaA06g19430D
GO:0005794	Golgi apparatus	cellular_component	8	39262	0.376979	0.471389	1.0049	BnaC07g12940D,BnaA09g54620D,BnaC05g19050D,BnaC05g35000D,BnaA07g09750D,BnaAnng26940D,BnaA05g21820D,BnaC05g25800D
GO:0000808	origin recognition complex	cellular_component	8	39262	0.566525	0.666213	0.921162	BnaA07g17160D,BnaCnng40110D,BnaA06g35140D,BnaCnng47480D,BnaA09g20750D,BnaA05g06960D,BnaCnng67410D,BnaC07g48740D
GO:0005778	peroxisomal membrane	cellular_component	7	39262	0	0	1.38174	BnaC03g51450D,BnaA09g06240D,BnaA10g22990D,BnaCnng39220D,BnaA09g34620D,BnaA06g22290D,BnaC09g50920D
GO:0005798	Golgi-associated vesicle	cellular_component	7	39262	0	0	1.38174	BnaC01g03930D,BnaC03g29080D,BnaC07g05510D,BnaA07g03550D,BnaA08g11170D,BnaA01g02670D,BnaC03g66090D
GO:0031429	box H/ACA snoRNP complex	cellular_component	7	39262	0.0752482	0.116049	1.20903	BnaA03g06930D,BnaA01g33870D,BnaC01g40380D,BnaC02g48350D,BnaC03g08830D,BnaC02g07930D,BnaA02g04000D
GO:0042720	mitochondrial inner membrane peptidase complex	cellular_component	7	39262	0.0752482	0.116049	1.20903	BnaA10g25390D,BnaC09g50420D,BnaC07g09330D,BnaC09g45470D,BnaA03g03210D,BnaA10g21360D,BnaA05g29340D
GO:0005850	eukaryotic translation initiation factor 2 complex	cellular_component	6	39262	0	0	1.38174	BnaA05g05450D,BnaA04g22420D,BnaA03g19010D,BnaC03g72650D,BnaC04g04870D,BnaC04g46940D
GO:0008290	F-actin capping protein complex	cellular_component	6	39262	0	0	1.38174	BnaAnng02650D,BnaC06g32760D,BnaA07g29570D,BnaA03g29040D,BnaAnng02460D,BnaC03g34290D
GO:0009316	3-isopropylmalate dehydratase complex	cellular_component	6	39262	0	0	1.38174	BnaC03g24020D,BnaC04g52970D,BnaA05g34460D,BnaA05g34440D,BnaA03g20030D,BnaC04g52960D
GO:0016442	RISC complex	cellular_component	6	39262	0	0	1.38174	BnaC02g01650D,BnaA06g21290D,BnaCnng59840D,BnaC03g03000D,BnaAnng13680D,BnaA03g02010D
GO:0045254	pyruvate dehydrogenase complex	cellular_component	6	39262	0	0	1.38174	BnaA05g25500D,BnaC06g07040D,BnaA06g00560D,BnaC03g38230D,BnaCnng28440D,BnaA03g33170D
GO:0042765	GPI-anchor transamidase complex	cellular_component	6	39262	0.103979	0.155542	1.18435	BnaCnng09260D,BnaA05g30440D,BnaA05g30390D,BnaC09g38460D,BnaA10g15910D,BnaC05g44830D
GO:0005615	extracellular space	cellular_component	6	39262	0.996291	1	0.518154	BnaA09g37510D,BnaA10g22090D,BnaC02g00510D,BnaA02g00360D,BnaC01g11000D,BnaA01g09410D
GO:0000178	exosome (RNase complex)	cellular_component	5	39262	0	0	1.38174	BnaA08g30610D,BnaA10g01850D,BnaA07g25550D,BnaC05g01900D,BnaC06g27350D
GO:0016585	chromatin remodeling complex	cellular_component	5	39262	0	0	1.38174	BnaC02g08260D,BnaA05g30940D,BnaAnng03220D,BnaC05g45420D,BnaC09g39190D
GO:0030076	light-harvesting complex	cellular_component	5	39262	0	0	1.38174	BnaC05g32120D,BnaC03g60960D,BnaC09g27520D,BnaC05g32130D,BnaC06g14690D
GO:0030122	AP-2 adaptor complex	cellular_component	5	39262	0	0	1.38174	BnaA09g53440D,BnaC04g17890D,BnaC06g40760D,BnaCnng41930D,BnaA10g05040D
GO:0031519	PcG protein complex	cellular_component	5	39262	0	0	1.38174	BnaA10g10150D,BnaCnng01170D,BnaC04g35880D,BnaA09g00500D,BnaA04g13630D
GO:0070985	TFIIK complex	cellular_component	5	39262	0	0	1.38174	BnaC09g03240D,BnaA06g28650D,BnaA02g31220D,BnaA09g03810D,BnaC07g28080D
GO:0000796	condensin complex	cellular_component	5	39262	0.143678	0.206836	1.15145	BnaC04g30270D,BnaCnng15200D,BnaA06g17360D,BnaC03g74950D,BnaA06g21840D
GO:0030123	AP-3 adaptor complex	cellular_component	5	39262	0.143678	0.206836	1.15145	BnaC08g22250D,BnaC07g31900D,BnaC08g26310D,BnaA03g41000D,BnaA09g35060D
GO:0031361	integral component of thylakoid membrane	cellular_component	5	39262	0.612215	0.71029	0.863589	BnaC07g11900D,BnaC01g21760D,BnaA10g13990D,BnaC09g27660D,BnaC04g29460D
GO:0005938	cell cortex	cellular_component	5	39262	0.887407	0.955401	0.690872	BnaC02g04320D,BnaA02g01230D,BnaC09g44380D,BnaC03g09600D,BnaA10g20350D
GO:0000124	SAGA complex	cellular_component	4	39262	0	0	1.38174	BnaC06g33590D,BnaA02g15970D,BnaC02g21390D,BnaA07g30150D
GO:0005666	DNA-directed RNA polymerase III complex	cellular_component	4	39262	0	0	1.38174	BnaA10g22580D,BnaA01g14530D,BnaC01g17110D,BnaC09g47140D
GO:0005758	mitochondrial intermembrane space	cellular_component	4	39262	0	0	1.38174	BnaA01g28840D,BnaC06g06070D,BnaA06g01220D,BnaC01g36110D
GO:0005761	mitochondrial ribosome	cellular_component	4	39262	0	0	1.38174	BnaC08g43520D,BnaA09g49220D,BnaC05g05510D,BnaA06g04330D
GO:0005785	signal recognition particle receptor complex	cellular_component	4	39262	0	0	1.38174	BnaC01g07800D,BnaA01g06530D,BnaC07g42770D,BnaA03g50330D
GO:0005788	endoplasmic reticulum lumen	cellular_component	4	39262	0	0	1.38174	BnaA09g01190D,BnaC09g00360D,BnaA03g25890D,BnaC03g30470D
GO:0005829	cytosol	cellular_component	4	39262	0	0	1.38174	BnaC06g17620D,BnaA07g18600D,BnaC08g30190D,BnaA09g38220D
GO:0009349	riboflavin synthase complex	cellular_component	4	39262	0	0	1.38174	BnaC04g49410D,BnaA04g25520D,BnaC03g24640D,BnaA03g20600D
GO:0030176	integral component of endoplasmic reticulum membrane	cellular_component	4	39262	0	0	1.38174	BnaC03g72270D,BnaC06g35260D,BnaA07g31470D,BnaA02g16890D
GO:0030880	RNA polymerase complex	cellular_component	4	39262	0	0	1.38174	BnaC04g26910D,BnaC09g01670D,BnaC04g32020D,BnaA09g02260D
GO:0030896	checkpoint clamp complex	cellular_component	4	39262	0	0	1.38174	BnaA05g14810D,BnaC06g09750D,BnaA05g31740D,BnaC05g46310D
GO:0043564	Ku70:Ku80 complex	cellular_component	4	39262	0	0	1.38174	BnaC05g13070D,BnaA06g11440D,BnaA08g29690D,BnaC08g03910D
GO:0044431	Golgi apparatus part	cellular_component	4	39262	0	0	1.38174	BnaC07g12940D,BnaA09g54620D,BnaC05g19050D,BnaA07g09750D
GO:0070652	HAUS complex	cellular_component	4	39262	0	0	1.38174	BnaC07g26540D,BnaA03g19440D,BnaA06g30180D,BnaC03g23320D
GO:0005846	nuclear cap binding complex	cellular_component	4	39262	0.472808	0.569068	0.921162	BnaC09g08560D,BnaA06g36240D,BnaA03g38370D,BnaC07g17720D
GO:0030532	small nuclear ribonucleoprotein complex	cellular_component	4	39262	0.472808	0.569068	0.921162	BnaC04g21170D,BnaC08g32520D,BnaA04g00350D,BnaC06g18620D
GO:0043626	PCNA complex	cellular_component	4	39262	0.472808	0.569068	0.921162	BnaC08g45280D,BnaC04g54440D,BnaA05g12470D,BnaA09g49520D
GO:0043189	H4/H2A histone acetyltransferase complex	cellular_component	4	39262	0.92767	0.987113	0.614108	BnaA07g09500D,BnaA09g28940D,BnaC05g20330D,BnaC07g12260D
GO:0005674	transcription factor TFIIF complex	cellular_component	4	39262	0.994517	1	0.460581	BnaA07g21660D,BnaA02g17270D,BnaC02g24370D,BnaCnng67730D
GO:0012511	monolayer-surrounded lipid storage body	cellular_component	4	39262	1	1	0.102351	BnaC08g03140D,BnaA06g03370D,BnaC06g02430D,BnaA05g21590D
GO:0005838	proteasome regulatory particle	cellular_component	3	39262	0	0	1.38174	BnaCnng39010D,BnaAnng30740D,BnaA09g12190D
GO:0032389	MutLalpha complex	cellular_component	3	39262	0	0	1.38174	BnaC02g27290D,BnaA02g20560D,BnaCnng68560D
GO:0045239	tricarboxylic acid cycle enzyme complex	cellular_component	3	39262	0	0	1.38174	BnaC04g51900D,BnaC04g51220D,BnaA05g00440D
GO:0005751	mitochondrial respiratory chain complex IV	cellular_component	3	39262	0.274329	0.359074	1.03631	BnaA04g28190D,BnaA08g15810D,BnaC01g01190D
GO:0072546	ER membrane protein complex	cellular_component	3	39262	0.958576	1	0.518154	BnaA10g20960D,BnaCnng59410D,BnaCnng57230D
GO:0000172	ribonuclease MRP complex	cellular_component	2	39262	0	0	1.38174	BnaC04g02780D,BnaA05g03220D
GO:0000445	THO complex part of transcription export complex	cellular_component	2	39262	0	0	1.38174	BnaCnng06090D,BnaA05g32250D
GO:0005639	integral component of nuclear inner membrane	cellular_component	2	39262	0	0	1.38174	BnaA06g35950D,BnaC07g19240D
GO:0005655	nucleolar ribonuclease P complex	cellular_component	2	39262	0	0	1.38174	BnaC04g02780D,BnaA05g03220D
GO:0005663	DNA replication factor C complex	cellular_component	2	39262	0	0	1.38174	BnaA02g05420D,BnaC08g49560D
GO:0005764	lysosome	cellular_component	2	39262	0	0	1.38174	BnaC07g32480D,BnaA03g57960D
GO:0005847	mRNA cleavage and polyadenylation specificity factor complex	cellular_component	2	39262	0	0	1.38174	BnaC07g30520D,BnaA06g26440D
GO:0005952	cAMP-dependent protein kinase complex	cellular_component	2	39262	0	0	1.38174	BnaC07g00870D,BnaA07g00650D
GO:0009341	beta-galactosidase complex	cellular_component	2	39262	0	0	1.38174	BnaC04g26310D,BnaA04g04110D
GO:0019008	molybdopterin synthase complex	cellular_component	2	39262	0	0	1.38174	BnaA03g14790D,BnaC03g17830D
GO:0030096	plasma membrane-derived thylakoid photosystem II	cellular_component	2	39262	0	0	1.38174	BnaC01g21750D,BnaC04g29450D
GO:0030677	ribonuclease P complex	cellular_component	2	39262	0	0	1.38174	BnaC04g02780D,BnaA05g03220D
GO:0030870	Mre11 complex	cellular_component	2	39262	0	0	1.38174	BnaC03g17840D,BnaA03g14800D
GO:0032039	integrator complex	cellular_component	2	39262	0	0	1.38174	BnaC05g44430D,BnaA05g30100D
GO:0032301	MutSalpha complex	cellular_component	2	39262	0	0	1.38174	BnaCnng23780D,BnaA03g34810D
GO:0032302	MutSbeta complex	cellular_component	2	39262	0	0	1.38174	BnaCnng23780D,BnaA03g34810D
GO:0032783	ELL-EAF complex	cellular_component	2	39262	0	0	1.38174	BnaA07g29120D,BnaC06g32230D
GO:0042597	periplasmic space	cellular_component	2	39262	0	0	1.38174	BnaA07g06870D,BnaCnng19450D
GO:0043240	Fanconi anaemia nuclear complex	cellular_component	2	39262	0	0	1.38174	BnaA06g24690D,BnaCnng13320D
GO:0070531	BRCA1-A complex	cellular_component	2	39262	0	0	1.38174	BnaC07g44040D,BnaA03g52280D
GO:0070552	BRISC complex	cellular_component	2	39262	0	0	1.38174	BnaC07g44040D,BnaA03g52280D
GO:0071203	WASH complex	cellular_component	2	39262	0	0	1.38174	BnaC06g32760D,BnaA07g29570D
GO:0009539	photosystem II reaction center	cellular_component	2	39262	0.379061	0.471389	0.921162	BnaC01g21750D,BnaC04g29450D
GO:0031515	tRNA (m1A) methyltransferase complex	cellular_component	2	39262	0.379061	0.471389	0.921162	BnaC09g42900D,BnaA10g19210D
GO:0033588	Elongator holoenzyme complex	cellular_component	2	39262	0.379061	0.471389	0.921162	BnaA05g27780D,BnaC05g41960D
GO:0005673	transcription factor TFIIE complex	cellular_component	2	39262	0.693255	0.787093	0.690872	BnaC02g28890D,BnaA02g21830D
GO:0005965	protein farnesyltransferase complex	cellular_component	2	39262	0.693255	0.787093	0.690872	BnaC04g32260D,BnaA04g10140D
GO:0031305	integral component of mitochondrial inner membrane	cellular_component	2	39262	0.693255	0.787093	0.690872	BnaC03g76330D,BnaA08g16330D
GO:0009512	cytochrome b6f complex	cellular_component	2	39262	0.946802	1	0.460581	BnaA09g40450D,BnaC08g32890D
GO:0000799	nuclear condensin complex	cellular_component	1	39262	0	0	1.38174	BnaA03g42240D
GO:0009536	plastid	cellular_component	1	39262	0	0	1.38174	BnaC06g14700D
GO:0005515	protein binding	molecular_function	7720	39262	0.935666	0.994334	0.991823	BnaA05g17810D,BnaCnng64260D,BnaCnng38640D,BnaA02g23350D,BnaC03g56410D,BnaA03g21700D,BnaA01g30210D,BnaC08g19400D,BnaC05g06700D,BnaC08g01210D,BnaCnng46620D,BnaA09g29620D,BnaC02g02250D,BnaC08g43170D,BnaC07g45790D,BnaA09g01440D,BnaC02g15980D,BnaC09g39890D,BnaC09g41520D,BnaC05g07300D,BnaA09g53230D,BnaA08g24640D,BnaAnng02520D,BnaC03g09560D,BnaA01g27170D,BnaA08g14650D,BnaA03g00470D,BnaC04g43520D,BnaC02g…
GO:0005524	ATP binding	molecular_function	4891	39262	2.07992e-17	5.40189e-17	1.0601	BnaA05g33440D,BnaCnng48630D,BnaA10g08090D,BnaC01g39300D,BnaC03g41960D,BnaC03g31970D,BnaA09g29620D,BnaC03g67000D,BnaA07g26130D,BnaC01g15460D,BnaC01g18070D,BnaA08g27250D,BnaA02g15690D,BnaAnng31880D,BnaA07g14290D,BnaC03g14930D,BnaC09g19110D,BnaAnng18700D,BnaC09g09120D,BnaA01g09530D,BnaC03g07550D,BnaC08g03540D,BnaA03g19260D,BnaCnng23380D,BnaA06g37490D,BnaA01g33140D,BnaC03g31160D,BnaC09g33860D,BnaC03g…
GO:0003677	DNA binding	molecular_function	3132	39262	1	1	0.919596	BnaA09g47260D,BnaA03g55680D,BnaC01g01290D,BnaA03g04490D,BnaA05g31430D,BnaC03g67000D,BnaA08g26650D,BnaC03g03210D,BnaC09g34140D,BnaC07g17030D,BnaC03g16940D,BnaA01g34550D,BnaA03g16650D,BnaC09g40110D,BnaC06g28390D,BnaC03g31160D,BnaC05g09630D,BnaA07g10270D,BnaAnng04850D,BnaA01g02900D,BnaA08g21220D,BnaCnng47540D,BnaC01g35600D,BnaA02g35830D,BnaC02g11150D,BnaA04g01750D,BnaA03g19580D,BnaA10g18560D,BnaA02g…
GO:0008270	zinc ion binding	molecular_function	3105	39262	5.72405e-08	1.4215e-07	1.04846	BnaA01g30210D,BnaC07g23810D,BnaA09g52630D,BnaC08g01210D,BnaC09g07920D,BnaC09g36150D,BnaA06g32550D,BnaC03g54400D,BnaC05g10490D,BnaA09g53230D,BnaC03g16940D,BnaC06g11450D,BnaA08g24640D,BnaAnng02520D,BnaA08g14650D,BnaA02g35510D,BnaC09g03900D,BnaC07g25010D,BnaA01g35150D,BnaC03g33170D,BnaA03g16650D,BnaC01g16060D,BnaA03g24630D,BnaC04g47860D,BnaC09g49070D,BnaA06g38090D,BnaA01g31130D,BnaA03g12630D,BnaC03g…
GO:0003824	catalytic activity	molecular_function	2734	39262	2.42952e-08	6.07934e-08	1.05345	BnaA09g57250D,BnaC08g09570D,BnaC07g23810D,BnaA08g00480D,BnaA07g25530D,BnaC07g45790D,BnaA01g29180D,BnaA09g48990D,BnaC04g33690D,BnaAnng34490D,BnaC03g30560D,BnaAnng03120D,BnaA03g19260D,BnaC02g14570D,BnaA04g07780D,BnaC07g13010D,BnaA01g04910D,BnaC01g11440D,BnaC08g04140D,BnaC08g30890D,BnaC04g22290D,BnaC04g45850D,BnaC03g03530D,BnaA04g03760D,BnaC03g14120D,BnaA05g04720D,BnaC09g09440D,BnaC02g01160D,BnaAnng…
GO:0000166	nucleotide binding	molecular_function	2660	39262	1.33358e-25	3.48001e-25	1.1044	BnaA03g21700D,BnaC03g41960D,BnaC01g24850D,BnaA01g29180D,BnaA09g48990D,BnaC07g24410D,BnaA01g08930D,BnaC01g28060D,BnaA10g17640D,BnaC02g03980D,BnaA02g15690D,BnaC07g02580D,BnaA05g07010D,BnaAnng18700D,BnaC07g00570D,BnaA09g55560D,BnaC09g05100D,BnaC04g45850D,BnaA08g21220D,BnaC01g15780D,BnaC01g28380D,BnaA06g36080D,BnaCnng45530D,BnaC09g46780D,BnaA08g16170D,BnaA02g34420D,BnaA05g03310D,BnaA07g26770D,BnaC04g…
GO:0004672	protein kinase activity	molecular_function	2569	39262	0.0294775	0.0503229	1.01886	BnaCnng48630D,BnaA10g08090D,BnaC01g39300D,BnaC03g31970D,BnaA09g29620D,BnaA07g26130D,BnaC01g15460D,BnaC01g18070D,BnaAnng31880D,BnaA07g14290D,BnaC03g14930D,BnaC09g19110D,BnaC09g09120D,BnaA01g09530D,BnaC08g03540D,BnaA03g19260D,BnaCnng23380D,BnaA06g37490D,BnaA01g33140D,BnaC09g33860D,BnaC03g18140D,BnaC03g54720D,BnaA06g25490D,BnaC04g19100D,BnaA10g11610D,BnaA05g16720D,BnaA03g23220D,BnaC03g50700D,BnaC09g…
GO:0004713	protein tyrosine kinase activity	molecular_function	2371	39262	3.55737e-09	8.99742e-09	1.06126	BnaCnng48630D,BnaA10g08090D,BnaC01g39300D,BnaC03g31970D,BnaA09g29620D,BnaC01g15460D,BnaC01g18070D,BnaAnng31880D,BnaA07g14290D,BnaC03g14930D,BnaC09g19110D,BnaC09g09120D,BnaA01g09530D,BnaC08g03540D,BnaA03g19260D,BnaCnng23380D,BnaA06g37490D,BnaA01g33140D,BnaC09g33860D,BnaC03g18140D,BnaC03g54720D,BnaA06g25490D,BnaC04g19100D,BnaA10g11610D,BnaA05g16720D,BnaA03g23220D,BnaC03g50700D,BnaC09g35060D,BnaA05g…
GO:0004674	protein serine/threonine kinase activity	molecular_function	1955	39262	0.000278163	0.00063163	1.04016	BnaCnng48630D,BnaA10g08090D,BnaC01g39300D,BnaC03g31970D,BnaC01g15460D,BnaC01g18070D,BnaAnng31880D,BnaC09g09120D,BnaA01g09530D,BnaA03g19260D,BnaCnng23380D,BnaA01g33140D,BnaC09g33860D,BnaC03g18140D,BnaC03g54720D,BnaA06g25490D,BnaC04g19100D,BnaA10g11610D,BnaA05g16720D,BnaA03g23220D,BnaC03g50700D,BnaC09g35060D,BnaA07g30410D,BnaC05g33560D,BnaC03g09070D,BnaA02g22580D,BnaA10g00690D,BnaC05g06530D,BnaA05g…
GO:0003676	nucleic acid binding	molecular_function	1920	39262	9.96e-07	2.44e-06	1.05611	BnaC02g01650D,BnaA03g21700D,BnaA09g52630D,BnaC09g36150D,BnaC02g02250D,BnaC03g54400D,BnaC03g67000D,BnaA01g08930D,BnaA10g17640D,BnaC02g19190D,BnaA05g07010D,BnaC03g33170D,BnaAnng09470D,BnaA09g55560D,BnaA03g12630D,BnaC06g14380D,BnaA08g27570D,BnaA06g36080D,BnaCnng45530D,BnaC03g57650D,BnaA05g03310D,BnaC09g47380D,BnaA09g54470D,BnaA01g09040D,BnaA06g34390D,BnaC07g23640D,BnaC03g02440D,BnaC03g41790D,BnaA05g…
GO:0016491	oxidoreductase activity	molecular_function	1537	39262	5.88e-09	1.48e-08	1.07586	BnaA08g20300D,BnaC06g11450D,BnaC07g46390D,BnaC02g03980D,BnaA02g36110D,BnaA01g32860D,BnaA06g31460D,BnaC03g05860D,BnaC09g36790D,BnaC01g12360D,BnaA09g17130D,BnaC04g40420D,BnaA09g51860D,BnaAnng03760D,BnaCnng30110D,BnaC03g12430D,BnaA09g01270D,BnaC06g36850D,BnaA03g25870D,BnaA04g24820D,BnaA09g26030D,BnaA03g27070D,BnaC09g54110D,BnaC09g00310D,BnaC03g01350D,BnaCnng09750D,BnaC08g26120D,BnaC03g61120D,BnaA03g…
GO:0003700	sequence-specific DNA binding transcription factor activity	molecular_function	1404	39262	0.904637	0.971284	0.981765	BnaC01g01290D,BnaA03g04490D,BnaC06g23450D,BnaAnng01920D,BnaA01g34550D,BnaC09g03900D,BnaA01g35150D,BnaCnng64580D,BnaA04g12020D,BnaA07g10270D,BnaA01g02900D,BnaCnng47540D,BnaC02g00560D,BnaC03g19870D,BnaA02g35830D,BnaA06g21470D,BnaA09g00350D,BnaA03g19580D,BnaA09g54470D,BnaC09g45370D,BnaAnng00020D,BnaC04g08020D,BnaC02g27650D,BnaA04g02670D,BnaA02g31000D,BnaC08g04780D,BnaC01g20660D,BnaC03g10740D,BnaA04g…
GO:0003735	structural constituent of ribosome	molecular_function	1185	39262	1.97e-42	5.16e-42	1.20839	BnaA04g01110D,BnaC02g11640D,BnaC08g42570D,BnaAnng03930D,BnaC08g45180D,BnaC07g26420D,BnaA09g55240D,BnaA05g34040D,BnaC03g08960D,BnaC03g13200D,BnaA08g17260D,BnaC09g06510D,BnaAnng02840D,BnaA03g29570D,BnaC08g32090D,BnaA02g21980D,BnaC01g37930D,BnaAnng28200D,BnaA02g30400D,BnaC02g12070D,BnaC04g42750D,BnaA08g29090D,BnaA04g28840D,BnaC05g07130D,BnaA10g10840D,BnaC03g13350D,BnaC02g00390D,BnaC03g58890D,BnaC01g…
GO:0043565	sequence-specific DNA binding	molecular_function	933	39262	0.000176245	0.000406378	1.06104	BnaAnng01920D,BnaA01g34550D,BnaC09g03900D,BnaA01g35150D,BnaA04g12020D,BnaA10g01780D,BnaC02g00560D,BnaC01g35600D,BnaA06g21470D,BnaA09g00350D,BnaC09g45370D,BnaAnng00020D,BnaC04g08020D,BnaC02g27650D,BnaA04g02670D,BnaA02g31000D,BnaC08g04780D,BnaA04g23410D,BnaA09g16360D,BnaA03g34610D,BnaC03g29850D,BnaA01g01640D,BnaC08g24430D,BnaA06g16420D,BnaC03g61760D,BnaC04g01540D,BnaA09g12980D,BnaA03g39060D,BnaC06g…
GO:0009055	electron carrier activity	molecular_function	884	39262	1	1	0.8506	BnaCnng23060D,BnaC09g05910D,BnaA05g19010D,BnaA05g32350D,BnaA05g09340D,BnaA06g20870D,BnaC05g39590D,BnaA09g02360D,BnaA09g16530D,BnaAnng01430D,BnaC04g16810D,BnaCnng05900D,BnaA09g04690D,BnaA03g20930D,BnaA02g23180D,BnaA08g16490D,BnaA01g05020D,BnaC01g22670D,BnaA08g21860D,BnaC07g15980D,BnaC07g35800D,BnaA03g36300D,BnaA01g01320D,BnaC04g17240D,BnaA10g27940D,BnaA07g34580D,BnaC03g61440D,BnaA10g23920D,BnaC07g…
GO:0016787	hydrolase activity	molecular_function	801	39262	5.63e-05	0.00013325	1.07142	BnaC05g47900D,BnaA07g22920D,BnaA06g22560D,BnaC02g10230D,BnaCnng38960D,BnaA09g48180D,BnaA08g17580D,BnaC07g10720D,BnaA10g16550D,BnaC01g35920D,BnaC01g38530D,BnaC03g19380D,BnaA03g29080D,BnaC05g04840D,BnaA05g28710D,BnaC06g06720D,BnaA05g16060D,BnaA03g35530D,BnaA05g14050D,BnaC07g23790D,BnaA05g28220D,BnaC09g15880D,BnaA09g45400D,BnaA03g43830D,BnaC05g14820D,BnaA10g12190D,BnaC06g06550D,BnaC07g30520D,BnaC07g…
GO:0005488	binding	molecular_function	791	39262	8.65e-11	2.22e-10	1.11983	BnaCnng64260D,BnaC09g40920D,BnaC02g15980D,BnaC07g21800D,BnaC03g09560D,BnaAnng00510D,BnaA02g33500D,BnaC01g17790D,BnaC01g22030D,BnaC04g30270D,BnaA07g29060D,BnaA07g37040D,BnaC02g11150D,BnaA06g22070D,BnaA09g50130D,BnaA10g11930D,BnaA01g08440D,BnaC07g27660D,BnaC06g37130D,BnaAnng08380D,BnaA01g34380D,BnaC05g02510D,BnaCnng58610D,BnaAnng04680D,BnaC07g15170D,BnaA10g15780D,BnaC01g31410D,BnaC06g33750D,BnaC05g…
GO:0020037	heme binding	molecular_function	766	39262	1	1	0.879082	BnaA10g15310D,BnaA05g19010D,BnaA09g08390D,BnaC08g43490D,BnaA05g09340D,BnaA06g20870D,BnaC08g44090D,BnaC05g39590D,BnaC03g33490D,BnaC01g21750D,BnaA03g53180D,BnaAnng01430D,BnaC04g56600D,BnaA02g23180D,BnaA04g27110D,BnaAnng29930D,BnaA08g16490D,BnaC01g22670D,BnaC07g15980D,BnaC07g35800D,BnaA01g01320D,BnaA04g22000D,BnaC04g17240D,BnaC03g61440D,BnaAnng19770D,BnaC06g32660D,BnaC07g24390D,BnaC02g35940D,BnaA04g…
GO:0046983	protein dimerization activity	molecular_function	750	39262	1	1	0.825743	BnaCnng74250D,BnaA06g24570D,BnaA01g20220D,BnaA03g04490D,BnaA05g31430D,BnaC03g57010D,BnaA07g13690D,BnaA08g15250D,BnaC07g19360D,BnaA01g02900D,BnaA02g35830D,BnaA10g02380D,BnaC05g03920D,BnaC03g61610D,BnaA09g25430D,BnaA04g27430D,BnaC05g44630D,BnaC01g36030D,BnaA03g36940D,BnaCnng54100D,BnaA04g13090D,BnaA01g00230D,BnaC07g22060D,BnaA07g20890D,BnaC05g02660D,BnaA01g03160D,BnaA04g26980D,BnaA06g13320D,BnaA01g…
GO:0003723	RNA binding	molecular_function	741	39262	4.71e-08	1.17e-07	1.10331	BnaA06g37170D,BnaC07g16750D,BnaC01g17790D,BnaC07g27340D,BnaA06g36080D,BnaC02g11150D,BnaA05g36690D,BnaA01g04100D,BnaC09g08030D,BnaAnng28200D,BnaA03g49710D,BnaC07g23640D,BnaC03g08790D,BnaC05g04520D,BnaC02g26240D,BnaA02g20890D,BnaA09g22010D,BnaA06g06110D,BnaC04g42260D,BnaA07g36590D,BnaC04g03230D,BnaC06g36680D,BnaC08g10420D,BnaC03g73600D,BnaAnng23730D,BnaC08g29370D,BnaC03g28760D,BnaA06g19350D,BnaA03g…
GO:0005506	iron ion binding	molecular_function	738	39262	1	1	0.859803	BnaCnng38640D,BnaA05g19010D,BnaA05g09340D,BnaA06g20870D,BnaC05g39590D,BnaA06g31460D,BnaAnng01430D,BnaC01g12360D,BnaA02g23180D,BnaAnng03760D,BnaCnng30110D,BnaA09g01270D,BnaA08g16490D,BnaC01g22670D,BnaC07g15980D,BnaC07g35800D,BnaA04g24820D,BnaA01g01320D,BnaC03g64860D,BnaC04g17240D,BnaC03g61440D,BnaC07g24390D,BnaC02g35940D,BnaC09g54260D,BnaA03g46760D,BnaA04g24160D,BnaC04g10440D,BnaA09g22480D,BnaAnng…
GO:0003682	chromatin binding	molecular_function	715	39262	0.944863	1	0.968575	BnaA03g55680D,BnaC03g03210D,BnaC09g34140D,BnaC09g40110D,BnaA02g36430D,BnaA01g31450D,BnaC06g25290D,BnaC05g36490D,BnaC04g08340D,BnaC04g45680D,BnaCnng70380D,BnaA02g35660D,BnaA01g16900D,BnaA01g33290D,BnaA01g02240D,BnaA06g11800D,BnaC03g68390D,BnaA08g22290D,BnaA05g27620D,BnaCnng06970D,BnaA03g58600D,BnaC04g07080D,BnaAnng15260D,BnaA06g05660D,BnaC01g02200D,BnaC04g52240D,BnaA03g58920D,BnaA08g19900D,BnaAnng…
GO:0005525	GTP binding	molecular_function	686	39262	1.69e-12	4.36e-12	1.14064	BnaC09g37880D,BnaAnng41710D,BnaC07g16750D,BnaA06g35480D,BnaC08g17710D,BnaC05g07620D,BnaA10g04390D,BnaC09g44450D,BnaC03g09880D,BnaA10g19160D,BnaC09g08030D,BnaA03g18170D,BnaC06g24690D,BnaC09g50900D,BnaA02g31320D,BnaC01g07800D,BnaC09g09590D,BnaA05g13450D,BnaA08g30110D,BnaC01g32650D,BnaC08g21330D,BnaA08g02800D,BnaC03g75120D,BnaC08g35500D,BnaC08g38110D,BnaA08g08340D,BnaC06g00520D,BnaC07g05820D,BnaA10g…
GO:0017111	nucleoside-triphosphatase activity	molecular_function	658	39262	1.38e-09	3.51e-09	1.12245	BnaA02g15690D,BnaAnng18700D,BnaA09g55560D,BnaA08g21220D,BnaC01g15780D,BnaA08g16170D,BnaA02g34420D,BnaA02g20570D,BnaA01g30040D,BnaA01g33780D,BnaC04g06010D,BnaC01g33100D,BnaC03g15360D,BnaAnng27110D,BnaC07g37000D,BnaA06g04910D,BnaC01g07800D,BnaA03g27390D,BnaC08g11510D,BnaA05g28710D,BnaC09g12630D,BnaC09g18980D,BnaCnng47690D,BnaC04g40250D,BnaA10g14690D,BnaC03g20400D,BnaC02g25790D,BnaCnng10610D,BnaC05g…
GO:0005509	calcium ion binding	molecular_function	649	39262	0.000160812	0.000371834	1.07395	BnaC07g44060D,BnaC08g43170D,BnaC07g45790D,BnaC01g15460D,BnaA06g25490D,BnaC09g16820D,BnaC09g40430D,BnaC09g02810D,BnaA04g23900D,BnaC07g29990D,BnaC07g36400D,BnaC06g08410D,BnaC09g09270D,BnaA10g16380D,BnaC07g39330D,BnaCnng11700D,BnaC09g08180D,BnaC01g38680D,BnaA06g15010D,BnaA03g41500D,BnaA09g36820D,BnaC01g32650D,BnaA06g17340D,BnaC09g02790D,BnaC02g33120D,BnaA06g02240D,BnaA06g15970D,BnaA09g33230D,BnaC07g…
GO:0046872	metal ion binding	molecular_function	595	39262	5.53e-05	0.000130931	1.08318	BnaCnng38640D,BnaC03g41960D,BnaC02g03980D,BnaC07g02580D,BnaC03g01200D,BnaC04g20280D,BnaC01g28380D,BnaC01g21750D,BnaC03g16450D,BnaA09g51860D,BnaA01g06430D,BnaA03g13550D,BnaA09g47090D,BnaC05g32150D,BnaA10g11120D,BnaC02g39810D,BnaA03g27070D,BnaC05g49250D,BnaA06g07520D,BnaC01g39770D,BnaA03g14790D,BnaC01g20170D,BnaA05g07480D,BnaA03g49860D,BnaC04g51000D,BnaC07g33620D,BnaA03g30100D,BnaA02g18610D,BnaA09g…
GO:0005215	transporter activity	molecular_function	569	39262	0.175441	0.248427	1.01973	BnaC02g17990D,BnaA04g02840D,BnaC07g01980D,BnaCnng63980D,BnaA07g29870D,BnaC06g25780D,BnaC09g20290D,BnaA07g20100D,BnaA10g29800D,BnaA05g06730D,BnaA03g21210D,BnaA03g14960D,BnaCnng06500D,BnaA07g32740D,BnaC07g20220D,BnaC03g25510D,BnaC04g04640D,BnaA06g18430D,BnaA02g36580D,BnaA05g10840D,BnaA07g03530D,BnaA03g11690D,BnaC05g45870D,BnaC09g19090D,BnaA03g08820D,BnaA10g29780D,BnaC02g38550D,BnaAnng22640D,BnaC02g…
GO:0003924	GTPase activity	molecular_function	475	39262	3.72e-15	9.66e-15	1.189	BnaC09g37880D,BnaAnng41710D,BnaA06g35480D,BnaC08g17710D,BnaC05g07620D,BnaA10g04390D,BnaC09g44450D,BnaA08g11230D,BnaC03g09880D,BnaA03g18170D,BnaC09g50900D,BnaA02g31320D,BnaC01g07800D,BnaC09g09590D,BnaC01g32650D,BnaA08g02800D,BnaC03g75120D,BnaC08g35500D,BnaC08g38110D,BnaA08g08340D,BnaC06g00520D,BnaC07g05820D,BnaA08g04640D,BnaC09g00290D,BnaC02g31750D,BnaC05g29420D,BnaC02g42340D,BnaA08g02950D,BnaA05g…
GO:0008168	methyltransferase activity	molecular_function	456	39262	0.00172169	0.0036428	1.07156	BnaC02g02250D,BnaC09g45860D,BnaCnng20770D,BnaCnng13390D,BnaC02g03490D,BnaA08g27890D,BnaC03g13030D,BnaC05g04520D,BnaA04g10650D,BnaC02g00070D,BnaC01g32820D,BnaA10g28220D,BnaA01g21290D,BnaC01g07310D,BnaC02g26390D,BnaC07g22380D,BnaC02g45930D,BnaA03g48770D,BnaA04g23880D,BnaCnng01050D,BnaC09g21520D,BnaA06g23300D,BnaA08g06160D,BnaC01g06690D,BnaC07g45440D,BnaC08g09540D,BnaA09g04020D,BnaA01g08900D,BnaA05g…
GO:0043531	ADP binding	molecular_function	347	39262	0.719793	0.809397	0.98251	BnaC08g40560D,BnaC09g39890D,BnaA07g12280D,BnaA01g09850D,BnaCnng64090D,BnaC07g18270D,BnaA01g33780D,BnaC07g37000D,BnaC08g11510D,BnaC09g12630D,BnaC09g18980D,BnaA09g16680D,BnaC01g40310D,BnaC07g35950D,BnaC05g19440D,BnaC06g40800D,BnaC03g63280D,BnaA06g08270D,BnaC09g10770D,BnaC02g47450D,BnaC08g37660D,BnaA02g23810D,BnaA01g10040D,BnaA05g24990D,BnaA03g44090D,BnaC03g18920D,BnaA07g26100D,BnaC01g18040D,BnaC05g…
GO:0004386	helicase activity	molecular_function	345	39262	9.96e-09	2.5e-08	1.15986	BnaC03g67000D,BnaC06g14380D,BnaC09g47380D,BnaC07g23640D,BnaC09g46290D,BnaC02g25790D,BnaA09g14990D,BnaC05g03580D,BnaAnng15580D,BnaA09g36650D,BnaA06g00550D,BnaA03g08650D,BnaC02g42020D,BnaC03g48730D,BnaA09g48000D,BnaA06g35130D,BnaC04g26280D,BnaA08g25530D,BnaA03g29860D,BnaC07g16550D,BnaA09g18980D,BnaC09g51300D,BnaC04g01510D,BnaC07g41400D,BnaA10g25240D,BnaC05g52240D,BnaC09g50360D,BnaC03g38220D,BnaCnng…
GO:0030170	pyridoxal phosphate binding	molecular_function	301	39262	0.00118872	0.00255125	1.09161	BnaA07g25530D,BnaA01g04910D,BnaC09g09440D,BnaC08g07070D,BnaC03g56240D,BnaA08g15890D,BnaA04g28670D,BnaC07g43610D,BnaA01g00870D,BnaAnng37410D,BnaC07g38390D,BnaC03g76360D,BnaC06g40630D,BnaA09g31220D,BnaC01g09790D,BnaA10g25590D,BnaA03g40560D,BnaC09g24770D,BnaAnng06510D,BnaAnng08840D,BnaC03g46060D,BnaA09g06670D,BnaC03g58220D,BnaC09g32740D,BnaC01g01090D,BnaA02g11150D,BnaC05g48620D,BnaC08g06270D,BnaC04g…
GO:0016887	ATPase activity	molecular_function	300	39262	0.0476714	0.0779819	1.04943	BnaA02g15690D,BnaC07g02580D,BnaA08g16170D,BnaA02g34420D,BnaA01g30040D,BnaC04g06010D,BnaCnng47690D,BnaC03g20400D,BnaCnng10610D,BnaA02g06130D,BnaA03g31830D,BnaA09g12170D,BnaA01g03480D,BnaC07g06910D,BnaA07g03040D,BnaC05g42770D,BnaC08g25990D,BnaA03g31340D,BnaC07g35780D,BnaC09g38300D,BnaC03g36730D,BnaA03g02620D,BnaA06g12060D,BnaC06g29130D,BnaC08g33960D,BnaA06g26550D,BnaA05g36020D,BnaC08g30540D,BnaC06g…
GO:0050660	flavin adenine dinucleotide binding	molecular_function	291	39262	0.6054	0.704871	0.990363	BnaC03g49190D,BnaA02g37030D,BnaA03g12950D,BnaA09g17130D,BnaA09g26030D,BnaC03g01350D,BnaA03g44600D,BnaA05g01130D,BnaC05g04350D,BnaCnng54420D,BnaA07g07060D,BnaA09g45720D,BnaC07g07510D,BnaC08g39840D,BnaC03g48410D,BnaC06g03450D,BnaCnng22600D,BnaA06g26720D,BnaAnng34630D,BnaA09g04510D,BnaA07g29200D,BnaC01g12500D,BnaA09g52600D,BnaC07g08090D,BnaC01g12330D,BnaC02g01450D,BnaA09g04980D,BnaAnng19740D,BnaA06g…
GO:0030246	carbohydrate binding	molecular_function	276	39262	0.999022	1	0.903699	BnaC01g39300D,BnaC07g23810D,BnaA05g12700D,BnaC03g51620D,BnaC03g13350D,BnaC09g02640D,BnaA02g06450D,BnaC01g41550D,BnaC06g30160D,BnaC08g20240D,BnaC04g49200D,BnaC04g27370D,BnaA04g04820D,BnaA07g16270D,BnaC08g34880D,BnaA01g35120D,BnaC03g46870D,BnaC03g69300D,BnaA03g24600D,BnaA03g00760D,BnaA01g32830D,BnaA02g13970D,BnaA10g13100D,BnaC09g35670D,BnaA07g38250D,BnaA04g27230D,BnaC02g28690D,BnaA06g17140D,BnaA05g…
GO:0000287	magnesium ion binding	molecular_function	272	39262	0.519229	0.617657	0.996908	BnaC07g23000D,BnaC04g22290D,BnaC03g65310D,BnaC01g28380D,BnaAnng05280D,BnaA06g07520D,BnaA04g04190D,BnaC08g24110D,BnaC03g03680D,BnaA08g09430D,BnaC03g50680D,BnaA03g40240D,BnaA01g29320D,BnaA08g30580D,BnaA09g33870D,BnaC03g48240D,BnaC02g42660D,BnaAnng37560D,BnaC03g38570D,BnaA03g14610D,BnaCnng60530D,BnaC04g23180D,BnaA03g10910D,BnaC02g27940D,BnaA03g36910D,BnaA08g14280D,BnaA05g07770D,BnaCnng02920D,BnaCnng…
GO:0008026	ATP-dependent helicase activity	molecular_function	258	39262	8.37e-12	2.15e-11	1.22086	BnaC03g67000D,BnaC06g14380D,BnaC09g47380D,BnaC07g23640D,BnaC09g46290D,BnaC02g25790D,BnaA09g14990D,BnaAnng15580D,BnaA06g00550D,BnaC02g42020D,BnaC03g48730D,BnaC04g24120D,BnaA06g35130D,BnaA08g25530D,BnaCnng49030D,BnaC09g51300D,BnaC04g01510D,BnaC06g33870D,BnaC05g52240D,BnaC09g50360D,BnaC03g38220D,BnaCnng28430D,BnaC02g05610D,BnaC07g30960D,BnaC02g47890D,BnaA04g19720D,BnaC01g03560D,BnaAnng06800D,BnaA07g…
GO:0004601	peroxidase activity	molecular_function	249	39262	0.0538597	0.0872368	1.05215	BnaA10g15310D,BnaA09g08390D,BnaC08g43490D,BnaC08g44090D,BnaC03g33490D,BnaC04g56600D,BnaAnng29930D,BnaA04g22000D,BnaC07g39330D,BnaAnng19770D,BnaC06g32660D,BnaC02g07500D,BnaC02g37290D,BnaA07g12740D,BnaC03g08610D,BnaC02g09490D,BnaA10g03270D,BnaA05g33880D,BnaC09g48590D,BnaA01g20660D,BnaA02g21780D,BnaAnng16320D,BnaA09g21850D,BnaC09g54550D,BnaC01g39080D,BnaC05g46590D,BnaC01g01400D,BnaA02g04560D,BnaA04g…
GO:0051082	unfolded protein binding	molecular_function	243	39262	2.67e-14	6.9e-14	1.25285	BnaA05g33440D,BnaC08g43170D,BnaA05g09020D,BnaA09g05780D,BnaC03g07550D,BnaA09g26520D,BnaA05g37290D,BnaAnng22000D,BnaC01g39280D,BnaA09g43710D,BnaAnng24970D,BnaC01g01110D,BnaC01g16200D,BnaC02g12700D,BnaA01g13780D,BnaA04g12800D,BnaAnng09440D,BnaA01g26860D,BnaA08g26940D,BnaA06g27790D,BnaC01g25250D,BnaA03g28450D,BnaC05g21040D,BnaA03g13030D,BnaC02g12680D,BnaA06g33590D,BnaA02g31930D,BnaC03g13470D,BnaC01g…
GO:0015035	protein disulfide oxidoreductase activity	molecular_function	239	39262	0.0119545	0.02234	1.07569	BnaCnng23060D,BnaC09g05910D,BnaA09g02360D,BnaCnng05900D,BnaA03g36300D,BnaA10g27940D,BnaC05g43860D,BnaA07g14600D,BnaA08g04320D,BnaC04g26940D,BnaA04g20460D,BnaAnng12480D,BnaA06g02880D,BnaA09g49730D,BnaC06g15930D,BnaC04g32420D,BnaC01g25910D,BnaC08g42050D,BnaC02g02860D,BnaA05g00500D,BnaC08g25810D,BnaC07g50790D,BnaA05g33390D,BnaA02g04900D,BnaA10g14980D,BnaC06g30940D,BnaA09g50890D,BnaC03g23300D,BnaC03g…
GO:0004842	ubiquitin-protein transferase activity	molecular_function	238	39262	2.64e-05	6.33e-05	1.13791	BnaCnng64260D,BnaA10g08090D,BnaA02g35510D,BnaAnng00510D,BnaA02g33500D,BnaA07g29060D,BnaC06g37130D,BnaCnng58610D,BnaAnng04680D,BnaA04g28030D,BnaA03g10450D,BnaC07g15170D,BnaA04g02180D,BnaA04g20950D,BnaC04g40080D,BnaC06g32170D,BnaA03g54900D,BnaA06g19180D,BnaC04g50550D,BnaA07g19050D,BnaA06g28240D,BnaC02g43580D,BnaAnng35870D,BnaA10g16520D,BnaC02g03460D,BnaA06g24690D,BnaA01g27290D,BnaC05g44600D,BnaC04g…
GO:0005507	copper ion binding	molecular_function	228	39262	1	1	0.797563	BnaC07g46390D,BnaC09g36790D,BnaA09g04690D,BnaA03g20930D,BnaA01g05020D,BnaA08g21860D,BnaA10g23920D,BnaC07g24070D,BnaCnng57030D,BnaCnng02950D,BnaC01g01920D,BnaA10g26680D,BnaA06g38550D,BnaA05g21570D,BnaC08g43140D,BnaC03g06920D,BnaC07g50320D,BnaAnng08030D,BnaA01g33260D,BnaA02g31610D,BnaC04g07220D,BnaAnng08180D,BnaC04g05360D,BnaC09g03680D,BnaA01g16530D,BnaC08g49630D,BnaC04g14580D,BnaA02g30180D,BnaC04g…
GO:0046982	protein heterodimerization activity	molecular_function	214	39262	4.71e-08	1.17e-07	1.19231	BnaAnng04850D,BnaC01g35600D,BnaC03g55640D,BnaA10g01290D,BnaA09g53380D,BnaC08g24430D,BnaA06g16420D,BnaCnng08660D,BnaC03g26430D,BnaA06g18260D,BnaCnng55660D,BnaA06g05170D,BnaA03g32260D,BnaC02g08740D,BnaC05g13560D,BnaA09g05430D,BnaCnng71120D,BnaA08g28140D,BnaA03g18140D,BnaA07g14090D,BnaC09g46260D,BnaC03g04250D,BnaA02g06910D,BnaC08g25320D,BnaCnng17200D,BnaCnng10730D,BnaA02g04240D,BnaC02g44320D,BnaC06g…
GO:0030599	pectinesterase activity	molecular_function	195	39262	1	1	0.620829	BnaCnng61650D,BnaA02g21340D,BnaC03g66720D,BnaA03g22940D,BnaA05g07650D,BnaA06g21790D,BnaA05g31580D,BnaA06g09680D,BnaA02g04440D,BnaA10g06710D,BnaC08g20880D,BnaC03g49650D,BnaC02g00700D,BnaUnng03540D,BnaC01g25100D,BnaC04g33340D,BnaA09g06030D,BnaCnng48920D,BnaA01g29470D,BnaA01g03620D,BnaC03g51740D,BnaA04g12290D,BnaC07g39450D,BnaAnng29070D,BnaA06g17460D,BnaC08g44200D,BnaCnng78530D,BnaA10g01400D,BnaCnng…
GO:0050662	coenzyme binding	molecular_function	194	39262	0.790432	0.877428	0.967719	BnaA01g29180D,BnaA09g48990D,BnaC06g37280D,BnaA05g29950D,BnaAnng20950D,BnaC06g16700D,BnaC05g13730D,BnaC05g38810D,BnaA03g29710D,BnaC08g38580D,BnaA10g19130D,BnaA09g56450D,BnaA07g30700D,BnaC03g12060D,BnaC07g40800D,BnaC08g24550D,BnaA05g24320D,BnaA02g30990D,BnaC07g42640D,BnaA05g30610D,BnaC05g13850D,BnaA01g10650D,BnaA03g19520D,BnaC04g27170D,BnaA06g29280D,BnaA09g54730D,BnaA03g50170D,BnaA10g11850D,BnaC04g…
GO:0022857	transmembrane transporter activity	molecular_function	193	39262	0.9948	1	0.903988	BnaC07g01980D,BnaCnng06500D,BnaA07g32740D,BnaA07g23350D,BnaCnng37060D,BnaC08g16940D,BnaC02g46700D,BnaA07g03530D,BnaC05g45870D,BnaC04g06480D,BnaA02g03350D,BnaCnng76720D,BnaC06g22500D,BnaA09g48640D,BnaA09g16500D,BnaC05g06500D,BnaA05g06210D,BnaC08g19520D,BnaC02g26360D,BnaC01g32940D,BnaA05g03260D,BnaAnng20110D,BnaC08g36710D,BnaA06g14680D,BnaAnng38770D,BnaC09g39020D,BnaC07g46160D,BnaA05g36140D,BnaA07g…
GO:0016881	acid-amino acid ligase activity	molecular_function	192	39262	6.09e-07	1.5e-06	1.18435	BnaA03g12310D,BnaC05g49100D,BnaC06g36210D,BnaA09g19140D,BnaC03g13840D,BnaC05g32470D,BnaC07g13160D,BnaA04g00170D,BnaC05g51200D,BnaC06g39290D,BnaA02g33480D,BnaC03g36410D,BnaC06g06060D,BnaA09g34960D,BnaC03g43940D,BnaA04g19750D,BnaA08g23200D,BnaC03g04740D,BnaCnng21490D,BnaA09g04490D,BnaC08g12720D,BnaC01g44130D,BnaA07g03330D,BnaC09g11660D,BnaC04g37650D,BnaCnng48400D,BnaC03g04710D,BnaA07g10040D,BnaC03g…
GO:0004190	aspartic-type endopeptidase activity	molecular_function	191	39262	0.99987	1	0.865288	BnaA06g36890D,BnaCnng63170D,BnaA10g15950D,BnaC09g12780D,BnaA08g07080D,BnaC07g32190D,BnaA06g33440D,BnaA10g15920D,BnaC09g21180D,BnaCnng34100D,BnaAnng08670D,BnaA08g25040D,BnaC08g43290D,BnaA05g19130D,BnaA07g35150D,BnaA03g42710D,BnaC04g17360D,BnaC08g28570D,BnaA03g41300D,BnaC08g15160D,BnaAnng18480D,BnaA10g21540D,BnaA06g25580D,BnaCnng73250D,BnaC06g17080D,BnaC08g00210D,BnaC06g38140D,BnaC03g02850D,BnaAnng…
GO:0004252	serine-type endopeptidase activity	molecular_function	190	39262	0.999999	1	0.82557	BnaA09g47580D,BnaA09g25920D,BnaCnng74080D,BnaA04g15270D,BnaC07g28090D,BnaA02g07220D,BnaC05g15740D,BnaC07g34050D,BnaA03g42890D,BnaA02g26740D,BnaCnng24440D,BnaA03g57660D,BnaA08g26620D,BnaA09g52920D,BnaA06g28390D,BnaA10g00170D,BnaAnng25710D,BnaC07g18390D,BnaC01g37240D,BnaC01g10790D,BnaAnng10120D,BnaA06g02850D,BnaC01g08350D,BnaA09g37860D,BnaCnng54050D,BnaC06g03570D,BnaA03g07680D,BnaA09g33990D,BnaA05g…
GO:0004857	enzyme inhibitor activity	molecular_function	168	39262	1	1	0.688822	BnaA02g21340D,BnaC03g66720D,BnaA03g22940D,BnaA06g21790D,BnaA05g31580D,BnaA06g09680D,BnaA10g06710D,BnaC08g20880D,BnaC03g49650D,BnaC02g00700D,BnaUnng03540D,BnaC01g25100D,BnaA09g06030D,BnaCnng48920D,BnaA01g29470D,BnaA01g03620D,BnaC03g51740D,BnaC07g39450D,BnaAnng29070D,BnaA06g17460D,BnaCnng78530D,BnaA10g01400D,BnaCnng69780D,BnaAnng30240D,BnaC03g51710D,BnaC03g27610D,BnaA01g14640D,BnaA03g55910D,BnaA09g…
GO:0015238	drug transmembrane transporter activity	molecular_function	163	39262	0.877888	0.95013	0.950313	BnaC03g18950D,BnaC03g64710D,BnaCnng41510D,BnaC03g59980D,BnaCnng48780D,BnaC03g68880D,BnaC01g41400D,BnaC01g09320D,BnaA09g13580D,BnaC03g49010D,BnaC07g41750D,BnaC06g00030D,BnaA01g14870D,BnaA07g29670D,BnaC05g25060D,BnaA07g23640D,BnaC09g40230D,BnaC01g30610D,BnaA02g04410D,BnaC08g39000D,BnaA08g10090D,BnaA08g31640D,BnaA03g02910D,BnaA10g05100D,BnaA10g07430D,BnaCnng68540D,BnaC06g27730D,BnaC08g40820D,BnaC07g…
GO:0015297	antiporter activity	molecular_function	163	39262	0.877888	0.95013	0.950313	BnaC03g18950D,BnaC03g64710D,BnaCnng41510D,BnaC03g59980D,BnaCnng48780D,BnaC03g68880D,BnaC01g41400D,BnaC01g09320D,BnaA09g13580D,BnaC03g49010D,BnaC07g41750D,BnaC06g00030D,BnaA01g14870D,BnaA07g29670D,BnaC05g25060D,BnaA07g23640D,BnaC09g40230D,BnaC01g30610D,BnaA02g04410D,BnaC08g39000D,BnaA08g10090D,BnaA08g31640D,BnaA03g02910D,BnaA10g05100D,BnaA10g07430D,BnaCnng68540D,BnaC06g27730D,BnaC08g40820D,BnaC07g…
GO:0003777	microtubule motor activity	molecular_function	159	39262	1e-09	2.56e-09	1.24828	BnaC02g21300D,BnaA04g21400D,BnaA02g34890D,BnaA01g16240D,BnaA09g11080D,BnaC08g22570D,BnaA07g06290D,BnaC01g28200D,BnaA03g02940D,BnaC01g23900D,BnaA01g23610D,BnaC05g17090D,BnaA06g38870D,BnaC02g41890D,BnaA05g21080D,BnaC03g54520D,BnaAnng07580D,BnaC07g28380D,BnaA03g39840D,BnaC03g60320D,BnaC08g21620D,BnaA09g44600D,BnaC08g37310D,BnaA05g28490D,BnaC01g16000D,BnaC01g24300D,BnaA05g22780D,BnaA06g37260D,BnaC05g…
GO:0019829	cation-transporting ATPase activity	molecular_function	150	39262	0.330247	0.42317	1.01599	BnaC03g41960D,BnaC07g02580D,BnaC01g28380D,BnaA01g06430D,BnaA10g11120D,BnaC05g49250D,BnaA06g07520D,BnaA03g49860D,BnaC03g48240D,BnaC08g33960D,BnaA09g49240D,BnaC08g30540D,BnaA01g24360D,BnaC03g68040D,BnaC08g28250D,BnaA09g46440D,BnaC08g40500D,BnaC08g45440D,BnaC04g20690D,BnaC02g11560D,BnaC04g18740D,BnaA09g52060D,BnaAnng10900D,BnaC05g05360D,BnaC05g44550D,BnaAnng27350D,BnaA09g05200D,BnaC07g17730D,BnaC03g…
GO:0051536	iron-sulfur cluster binding	molecular_function	149	39262	9.98e-06	2.41e-05	1.18322	BnaC04g16810D,BnaA03g14790D,BnaC03g64860D,BnaA07g34580D,BnaC09g14790D,BnaA03g35360D,BnaC07g35780D,BnaA09g08530D,BnaA09g06520D,BnaAnng23390D,BnaC01g13740D,BnaC03g17830D,BnaA03g26440D,BnaC07g21920D,BnaA04g15880D,BnaA01g09970D,BnaA01g31570D,BnaC01g12480D,BnaA06g20180D,BnaA05g03090D,BnaC01g02320D,BnaC09g50680D,BnaC03g46520D,BnaCnng27340D,BnaC05g12760D,BnaA08g25500D,BnaA03g31290D,BnaA09g00610D,BnaA03g…
GO:0005198	structural molecule activity	molecular_function	146	39262	4.01e-06	9.74e-06	1.1937	BnaC08g01360D,BnaA03g46120D,BnaC01g03930D,BnaA03g33990D,BnaC04g23840D,BnaC09g46600D,BnaA07g18770D,BnaC02g33270D,BnaC01g00490D,BnaA04g01230D,BnaA04g05890D,BnaA10g15260D,BnaCnng57320D,BnaCnng06450D,BnaC04g05360D,BnaA06g05140D,BnaA06g40470D,BnaC03g46520D,BnaA08g16430D,BnaA08g26740D,BnaC08g42980D,BnaC03g67560D,BnaA09g48730D,BnaA03g31580D,BnaAnng36560D,BnaCnng28060D,BnaC07g47050D,BnaA06g35540D,BnaC03g…
GO:0051287	NAD binding	molecular_function	139	39262	5.79e-05	0.000136775	1.17111	BnaC02g03980D,BnaC03g65310D,BnaA07g26770D,BnaA09g51860D,BnaC09g42760D,BnaA03g28480D,BnaA03g27070D,BnaA07g19710D,BnaA05g29950D,BnaA08g30580D,BnaC07g44840D,BnaA10g18700D,BnaC07g29000D,BnaC08g41130D,BnaC01g04190D,BnaC08g40850D,BnaA09g47060D,BnaCnng33820D,BnaA07g23150D,BnaA08g24270D,BnaC09g32890D,BnaC05g20270D,BnaCnng02920D,BnaC02g22980D,BnaA10g26650D,BnaA08g04610D,BnaA06g07790D,BnaC09g51280D,BnaA03g…
GO:0050661	NADP binding	molecular_function	137	39262	0.0411775	0.0682417	1.07556	BnaC01g28060D,BnaA03g28480D,BnaA09g26030D,BnaC07g07510D,BnaA09g04510D,BnaC08g40850D,BnaC02g01450D,BnaCnng21170D,BnaA01g34990D,BnaA08g24270D,BnaC05g49050D,BnaA10g23400D,BnaC07g11270D,BnaA08g04610D,BnaA06g07790D,BnaC08g40330D,BnaA02g34830D,BnaA09g53150D,BnaC03g05780D,BnaC05g23490D,BnaC09g13320D,BnaC08g19150D,BnaAnng14750D,BnaAnng12250D,BnaAnng31940D,BnaC08g41540D,BnaA01g35850D,BnaA09g25320D,BnaC02g…
GO:0003779	actin binding	molecular_function	137	39262	0.0897157	0.136315	1.05754	BnaA05g31750D,BnaA03g12630D,BnaC03g11510D,BnaC03g14440D,BnaAnng06370D,BnaA10g12850D,BnaC04g13710D,BnaC04g19570D,BnaC05g00330D,BnaC06g31250D,BnaA10g23430D,BnaC05g19270D,BnaC03g23480D,BnaC08g36570D,BnaAnng05100D,BnaC01g11730D,BnaC07g01460D,BnaC03g13000D,BnaC09g33660D,BnaA03g39200D,BnaC09g33170D,BnaC04g02110D,BnaA08g13190D,BnaA03g39180D,BnaC03g48530D,BnaC01g03880D,BnaA08g11150D,BnaC04g14870D,BnaC02g…
GO:0004812	aminoacyl-tRNA ligase activity	molecular_function	136	39262	0.737213	0.825598	0.968645	BnaA03g25380D,BnaC09g03560D,BnaA07g08470D,BnaC04g38130D,BnaA03g28620D,BnaA09g56940D,BnaUnng00270D,BnaA10g17760D,BnaC03g75900D,BnaC03g50160D,BnaC03g73230D,BnaC06g18340D,BnaA06g28360D,BnaC05g39850D,BnaC04g31130D,BnaC03g59920D,BnaC05g20730D,BnaC04g33290D,BnaC08g26210D,BnaC08g15130D,BnaCnng19820D,BnaC03g75530D,BnaA07g17620D,BnaA05g27370D,BnaAnng09530D,BnaC07g43190D,BnaA01g33520D,BnaA10g30390D,BnaC04g…
GO:0003899	DNA-directed RNA polymerase activity	molecular_function	132	39262	0.759328	0.847478	0.965027	BnaA10g18560D,BnaC09g46780D,BnaA09g54470D,BnaA07g07550D,BnaC04g01050D,BnaA02g02750D,BnaA02g00250D,BnaA05g12500D,BnaA01g36190D,BnaC09g05860D,BnaA07g24390D,BnaC07g36840D,BnaC04g26910D,BnaC09g01670D,BnaC09g14590D,BnaC04g36730D,BnaA05g22140D,BnaAnng33830D,BnaAnng35030D,BnaCnng17670D,BnaA07g27630D,BnaC03g72290D,BnaC01g20920D,BnaA09g08480D,BnaA04g14120D,BnaC01g27060D,BnaC07g27260D,BnaC07g30610D,BnaA03g…
GO:0008234	cysteine-type peptidase activity	molecular_function	127	39262	1	1	0.363315	BnaC09g14810D,BnaC09g08350D,BnaCnng09430D,BnaA06g18920D,BnaA10g29630D,BnaA08g06330D,BnaC04g11360D,BnaC02g34040D,BnaC01g41380D,BnaA05g20650D,BnaA03g09080D,BnaC01g00170D,BnaAnng18500D,BnaC08g13810D,BnaA02g06420D,BnaA06g05630D,BnaCnng05360D,BnaC03g11290D,BnaA03g08940D,BnaC06g42120D,BnaA06g05780D,BnaA06g06380D,BnaC01g32280D,BnaC05g11990D,BnaC07g15110D,BnaA02g21750D,BnaA01g26170D,BnaCnng45130D,BnaA09g…
GO:0008565	protein transporter activity	molecular_function	125	39262	9.45e-08	2.34e-07	1.24257	BnaC09g40920D,BnaC01g22030D,BnaA07g37040D,BnaC07g38240D,BnaC09g10130D,BnaA06g05340D,BnaC08g22250D,BnaC07g33450D,BnaA03g12600D,BnaA03g03370D,BnaAnng03410D,BnaA06g32030D,BnaA02g10870D,BnaA05g31550D,BnaA04g18170D,BnaC07g31900D,BnaAnng24940D,BnaA10g30440D,BnaA03g42370D,BnaA10g17560D,BnaC02g15090D,BnaA01g33380D,BnaCnng06740D,BnaA05g29380D,BnaA07g00990D,BnaC07g50410D,BnaA09g53440D,BnaC01g20230D,BnaC07g…
GO:0004222	metalloendopeptidase activity	molecular_function	119	39262	3.23e-09	8.19e-09	1.27463	BnaC01g15780D,BnaA09g14350D,BnaC04g40250D,BnaCnng29060D,BnaC04g38280D,BnaC09g34110D,BnaA10g07780D,BnaA09g49390D,BnaA10g04190D,BnaA05g04520D,BnaA07g23960D,BnaC06g09300D,BnaC03g56360D,BnaA05g11730D,BnaC03g78020D,BnaA09g36770D,BnaC08g33120D,BnaC05g36750D,BnaA06g23570D,BnaC08g01940D,BnaC04g43120D,BnaA06g37090D,BnaCnng02060D,BnaC06g26610D,BnaC07g48950D,BnaC06g28770D,BnaA04g15330D,BnaC09g33260D,BnaC05g…
GO:0022891	substrate-specific transmembrane transporter activity	molecular_function	118	39262	0.9312	0.990228	0.926396	BnaC07g01980D,BnaCnng06500D,BnaA07g03530D,BnaC05g45870D,BnaA02g03350D,BnaCnng76720D,BnaC06g22500D,BnaA09g48640D,BnaC05g06500D,BnaC02g26360D,BnaC01g32940D,BnaA05g03260D,BnaC08g36710D,BnaA06g14680D,BnaC07g46160D,BnaA05g36140D,BnaA07g11770D,BnaC04g48870D,BnaA05g19250D,BnaA05g31990D,BnaC01g33830D,BnaC04g02870D,BnaC03g73840D,BnaA08g26710D,BnaA03g29310D,BnaC02g06970D,BnaC08g42140D,BnaC07g15720D,BnaC08g…
GO:0004722	protein serine/threonine phosphatase activity	molecular_function	117	39262	6.51e-08	1.61e-07	1.25321	BnaAnng03120D,BnaA05g09980D,BnaA10g24200D,BnaC01g06710D,BnaC07g32210D,BnaA06g40990D,BnaC04g14780D,BnaA06g04080D,BnaA10g30150D,BnaC07g40980D,BnaC05g36140D,BnaA04g03880D,BnaC01g23390D,BnaA05g12330D,BnaC04g44070D,BnaC05g04960D,BnaA10g26970D,BnaC04g25820D,BnaC08g33610D,BnaC02g17610D,BnaA03g51750D,BnaC03g67410D,BnaC03g16540D,BnaA01g30450D,BnaA04g28120D,BnaC03g22500D,BnaC07g43530D,BnaA01g05090D,BnaCnng…
GO:0003743	translation initiation factor activity	molecular_function	117	39262	0.00114203	0.00245425	1.14655	BnaC06g10680D,BnaC03g08790D,BnaA09g22010D,BnaC07g37640D,BnaC08g12430D,BnaA03g48450D,BnaA02g21800D,BnaC07g17810D,BnaA08g14130D,BnaC07g44180D,BnaCnng05700D,BnaA09g17080D,BnaC07g30320D,BnaC07g37590D,BnaCnng36550D,BnaA03g50490D,BnaA09g26760D,BnaC09g19990D,BnaA02g05130D,BnaC01g04940D,BnaC03g71830D,BnaA06g11550D,BnaA07g03280D,BnaA06g26640D,BnaCnng00690D,BnaA07g20800D,BnaA07g29270D,BnaA05g12740D,BnaC08g…
GO:0016791	phosphatase activity	molecular_function	117	39262	0.00194454	0.00409848	1.13848	BnaAnng00980D,BnaA03g40730D,BnaC08g23490D,BnaC04g09400D,BnaA10g18040D,BnaA01g07320D,BnaA06g05800D,BnaC01g05100D,BnaC08g26880D,BnaC01g08990D,BnaC08g42510D,BnaA10g20770D,BnaC04g44700D,BnaA08g23000D,BnaC07g19130D,BnaC02g02660D,BnaA05g08340D,BnaA09g18460D,BnaC05g03030D,BnaA09g35500D,BnaA07g04540D,BnaC06g43820D,BnaC01g08960D,BnaC04g25620D,BnaC04g44820D,BnaA01g23680D,BnaC03g00320D,BnaC05g50000D,BnaC04g…
GO:0005543	phospholipid binding	molecular_function	114	39262	0.208472	0.286084	1.03631	BnaA09g53230D,BnaC05g07620D,BnaC08g00120D,BnaC07g10870D,BnaA06g40030D,BnaA10g20500D,BnaC01g06220D,BnaA05g23110D,BnaC03g26260D,BnaA01g00060D,BnaA02g08290D,BnaA08g25850D,BnaA10g11240D,BnaA02g36060D,BnaC03g64980D,BnaC05g03060D,BnaC02g34010D,BnaA06g06060D,BnaA10g21860D,BnaC03g05800D,BnaA03g59470D,BnaA02g25770D,BnaC01g11530D,BnaA03g21940D,BnaC09g43770D,BnaAnng02760D,BnaA07g30650D,BnaC04g15960D,BnaA09g…
GO:0004871	signal transducer activity	molecular_function	106	39262	0.000337028	0.000757968	1.17172	BnaA08g16660D,BnaA08g11230D,BnaA06g34070D,BnaA10g14860D,BnaA07g38280D,BnaC04g51810D,BnaC03g39830D,BnaA10g21570D,BnaCnng19880D,BnaA10g01920D,BnaC06g43070D,BnaA05g16520D,BnaC06g11890D,BnaC07g21260D,BnaC01g04010D,BnaA03g36890D,BnaA05g22950D,BnaA06g34500D,BnaA05g30760D,BnaC05g24110D,BnaC08g42660D,BnaA07g25770D,BnaA10g29230D,BnaA07g08880D,BnaC04g35930D,BnaA09g48410D,BnaA01g24300D,BnaC03g04510D,BnaC09g…
GO:0019901	protein kinase binding	molecular_function	105	39262	9.76e-05	0.000227182	1.18921	BnaC09g47870D,BnaA05g04550D,BnaC09g03240D,BnaC06g19140D,BnaA06g23620D,BnaC02g07160D,BnaA03g21010D,BnaA05g17760D,BnaA02g30350D,BnaAnng23850D,BnaA07g18740D,BnaA02g03470D,BnaC07g45730D,BnaA03g57140D,BnaC03g58020D,BnaA04g25830D,BnaC06g37050D,BnaA06g14500D,BnaC04g05160D,BnaC01g44890D,BnaA06g28650D,BnaA10g21170D,BnaC07g26630D,BnaAnng02560D,BnaC09g12990D,BnaA01g10100D,BnaC06g00240D,BnaCnng52280D,BnaC08g…
GO:0004650	polygalacturonase activity	molecular_function	103	39262	1	1	0.652842	BnaA01g03500D,BnaC08g18630D,BnaC07g38560D,BnaC06g01610D,BnaC05g01250D,BnaA05g23750D,BnaAnng25080D,BnaA01g13460D,BnaC03g34870D,BnaC07g49290D,BnaC05g37550D,BnaA07g25330D,BnaA05g03600D,BnaC09g42880D,BnaC05g18810D,BnaC06g31540D,BnaC03g24540D,BnaA05g02490D,BnaCnng27510D,BnaA09g31020D,BnaA05g23060D,BnaC08g32030D,BnaC01g04770D,BnaC03g39260D,BnaC05g46700D,BnaC09g33090D,BnaA03g20480D,BnaA04g25430D,BnaC06g…
GO:0004221	ubiquitin thiolesterase activity	molecular_function	102	39262	0.0462525	0.0758873	1.08414	BnaC07g39010D,BnaA06g17020D,BnaC07g43120D,BnaA03g58110D,BnaC04g47510D,BnaC09g33510D,BnaC02g01940D,BnaC08g01010D,BnaA01g05140D,BnaCnng60820D,BnaA02g00690D,BnaC01g00780D,BnaC05g32240D,BnaC02g11070D,BnaA08g28090D,BnaC01g06800D,BnaA03g43110D,BnaA03g09980D,BnaC03g41700D,BnaA08g16550D,BnaA09g41280D,BnaC03g67850D,BnaC03g12640D,BnaA10g14260D,BnaA03g32000D,BnaC01g07520D,BnaC03g60560D,BnaA03g05930D,BnaAnng…
GO:0016740	transferase activity	molecular_function	101	39262	0.00714363	0.0139645	1.12545	BnaA03g25550D,BnaA08g11060D,BnaC09g21840D,BnaA05g33900D,BnaC08g20390D,BnaC03g70970D,BnaC07g16720D,BnaA08g29550D,BnaA01g07320D,BnaA07g04740D,BnaC03g29970D,BnaC01g02320D,BnaA06g16370D,BnaA01g16360D,BnaC01g08990D,BnaA05g26160D,BnaA04g17370D,BnaC06g33200D,BnaC05g27190D,BnaC09g42360D,BnaC09g33290D,BnaC03g16690D,BnaC08g18870D,BnaA09g19840D,BnaC06g11170D,BnaA06g40730D,BnaC02g48920D,BnaC01g19510D,BnaA10g…
GO:0000156	phosphorelay response regulator activity	molecular_function	101	39262	0.970605	1	0.900362	BnaA07g31820D,BnaC05g36490D,BnaCnng03230D,BnaA10g21570D,BnaC07g43590D,BnaC07g29960D,BnaC09g14930D,BnaC08g27330D,BnaC07g21260D,BnaC08g27970D,BnaC03g48210D,BnaA06g34500D,BnaC03g23280D,BnaCnng27490D,BnaC06g35700D,BnaA04g14760D,BnaA07g25770D,BnaCnng47460D,BnaA04g26750D,BnaA05g02140D,BnaA07g08880D,BnaCnng17810D,BnaA02g25910D,BnaC03g39750D,BnaA03g40160D,BnaC03g04510D,BnaA03g19150D,BnaCnng49440D,BnaA08g…
GO:0004185	serine-type carboxypeptidase activity	molecular_function	100	39262	0.955766	1	0.909042	BnaC03g55150D,BnaA10g23110D,BnaC04g35520D,BnaA04g20780D,BnaC04g29380D,BnaA07g22720D,BnaCnng47980D,BnaC02g41710D,BnaC05g42570D,BnaC03g36530D,BnaC01g07580D,BnaC09g47000D,BnaA04g16130D,BnaC01g26460D,BnaC06g24780D,BnaC08g14700D,BnaA08g12880D,BnaA01g30770D,BnaC06g34270D,BnaC05g51120D,BnaC05g44060D,BnaC06g23660D,BnaA01g06320D,BnaA06g06810D,BnaA07g30770D,BnaC05g48510D,BnaA03g31200D,BnaA04g20790D,BnaC05g…
GO:0016779	nucleotidyltransferase activity	molecular_function	93	39262	0.0307735	0.0522101	1.09831	BnaA01g04100D,BnaAnng05280D,BnaA05g08890D,BnaA05g30810D,BnaA08g25700D,BnaA04g26310D,BnaC03g27000D,BnaA09g27560D,BnaA05g01740D,BnaA07g04740D,BnaA02g04240D,BnaC08g37460D,BnaC08g33440D,BnaA06g30310D,BnaA03g18750D,BnaC03g14040D,BnaC09g32370D,BnaA03g50310D,BnaA07g22000D,BnaA03g24520D,BnaA04g15160D,BnaA06g40730D,BnaC08g14330D,BnaA10g03820D,BnaA09g35770D,BnaC06g17980D,BnaA06g35980D,BnaC04g33380D,BnaA10g…
GO:0010181	FMN binding	molecular_function	93	39262	0.0621393	0.0993745	1.07985	BnaC05g30780D,BnaC03g14590D,BnaA03g46760D,BnaAnng10960D,BnaC08g48890D,BnaA02g17670D,BnaC01g16350D,BnaA08g26450D,BnaC08g08280D,BnaC05g47530D,BnaC03g38540D,BnaCnng16580D,BnaA05g19910D,BnaA04g09880D,BnaC01g36930D,BnaA10g29720D,BnaA08g30520D,BnaC07g38970D,BnaCnng67910D,BnaC07g42440D,BnaA01g29410D,BnaA05g37200D,BnaA01g29560D,BnaC06g35970D,BnaC01g32220D,BnaA06g16140D,BnaA05g25330D,BnaC03g45030D,BnaA06g…
GO:0008081	phosphoric diester hydrolase activity	molecular_function	92	39262	0.84204	0.922698	0.941632	BnaA04g10820D,BnaA02g36750D,BnaA01g15810D,BnaAnng36640D,BnaCnng67650D,BnaA02g12730D,BnaC06g13430D,BnaC04g32250D,BnaA08g16950D,BnaC03g12400D,BnaC08g02740D,BnaC09g33980D,BnaCnng75290D,BnaA04g10130D,BnaAnng13690D,BnaA02g12680D,BnaA07g22350D,BnaC07g51190D,BnaA09g21970D,BnaA09g35480D,BnaA04g06750D,BnaA05g07540D,BnaC09g33580D,BnaAnng41260D,BnaC06g35160D,BnaA05g29670D,BnaA08g02520D,BnaC09g34000D,BnaC02g…
GO:0008375	acetylglucosaminyltransferase activity	molecular_function	90	39262	0.801488	0.886707	0.949289	BnaC09g32940D,BnaC07g15830D,BnaA08g13240D,BnaC07g50350D,BnaA03g48620D,BnaCnng42580D,BnaCnng43180D,BnaA02g15340D,BnaC03g30210D,BnaA03g59990D,BnaA04g09760D,BnaC06g34640D,BnaC07g39940D,BnaC01g36150D,BnaA03g47650D,BnaA03g03510D,BnaCnng49150D,BnaA08g14080D,BnaC01g30240D,BnaA01g28790D,BnaA05g06940D,BnaA06g40900D,BnaA03g20010D,BnaA10g11330D,BnaC01g27640D,BnaA07g27060D,BnaC03g13040D,BnaC02g20540D,BnaC01g…
GO:0008762	UDP-N-acetylmuramate dehydrogenase activity	molecular_function	89	39262	0.246727	0.332748	1.0334	BnaA09g17130D,BnaA03g44600D,BnaA05g01130D,BnaCnng54420D,BnaA07g07060D,BnaCnng22600D,BnaC01g12500D,BnaC01g12330D,BnaAnng19740D,BnaA03g49660D,BnaC02g47420D,BnaC08g32840D,BnaA09g00610D,BnaA05g35540D,BnaAnng31480D,BnaC09g18430D,BnaCnng46690D,BnaC04g00690D,BnaC08g41860D,BnaA09g25810D,BnaA01g02300D,BnaAnng09190D,BnaC05g20360D,BnaA07g07120D,BnaA09g28890D,BnaCnng41060D,BnaA04g20350D,BnaUnng02510D,BnaA01g…
GO:0047134	protein-disulfide reductase activity	molecular_function	87	39262	0.992392	1	0.864832	BnaA01g07200D,BnaA04g10160D,BnaA01g05980D,BnaCnng44590D,BnaA07g15030D,BnaC07g01630D,BnaA09g00810D,BnaA09g00640D,BnaA04g25710D,BnaC03g11460D,BnaC03g23620D,BnaA04g25690D,BnaA07g13310D,BnaCnng23320D,BnaCnng33300D,BnaC04g03640D,BnaA06g14820D,BnaC03g24830D,BnaAnng38420D,BnaA03g16220D,BnaA01g08650D,BnaA05g06770D,BnaA09g51580D,BnaCnng42150D,BnaCnng22640D,BnaA03g17430D,BnaCnng42120D,BnaA05g16070D,BnaCnng…
GO:0004298	threonine-type endopeptidase activity	molecular_function	85	39262	8.63e-05	0.000201835	1.21081	BnaA05g17000D,BnaC04g18160D,BnaA02g19190D,BnaC05g09110D,BnaA08g24440D,BnaA01g05950D,BnaC04g17530D,BnaA04g01060D,BnaA03g22250D,BnaA06g15450D,BnaA09g31830D,BnaA08g03990D,BnaA09g15700D,BnaC04g18910D,BnaC03g57740D,BnaAnng29850D,BnaC08g22660D,BnaC04g38540D,BnaC06g41960D,BnaA06g32120D,BnaC03g67700D,BnaC03g56940D,BnaA05g14110D,BnaC09g17140D,BnaA03g60760D,BnaA07g20430D,BnaAnng21900D,BnaA01g18920D,BnaC07g…
GO:0004806	triglyceride lipase activity	molecular_function	85	39262	0.218575	0.298949	1.03936	BnaC03g32080D,BnaC08g23660D,BnaA04g05420D,BnaAnng30760D,BnaA01g20340D,BnaC01g25570D,BnaC01g10960D,BnaA10g28020D,BnaA09g26150D,BnaA07g07350D,BnaA01g29610D,BnaC08g46040D,BnaC02g41370D,BnaA04g00580D,BnaC04g17650D,BnaA01g34930D,BnaA03g05120D,BnaA05g30210D,BnaA03g27100D,BnaC09g42620D,BnaC04g41200D,BnaA09g51230D,BnaC05g23260D,BnaC03g62710D,BnaA02g20580D,BnaC08g01510D,BnaA01g20350D,BnaA04g24630D,BnaC08g…
GO:0046873	metal ion transmembrane transporter activity	molecular_function	84	39262	0.00213917	0.00446872	1.16066	BnaC01g12040D,BnaA09g55390D,BnaC02g25960D,BnaA07g04620D,BnaA06g10710D,BnaC05g40440D,BnaC04g48600D,BnaCnng27370D,BnaA04g18660D,BnaC01g33220D,BnaC07g36030D,BnaC05g34100D,BnaA03g31110D,BnaA05g10760D,BnaC01g05220D,BnaC02g09920D,BnaAnng21960D,BnaA03g44180D,BnaA06g23540D,BnaCnng47920D,BnaA07g26830D,BnaCnng46020D,BnaC03g63510D,BnaA04g24710D,BnaC04g12510D,BnaA09g13960D,BnaCnng30470D,BnaA05g26420D,BnaA08g…
GO:0016853	isomerase activity	molecular_function	84	39262	0.08357	0.128401	1.07469	BnaC09g52570D,BnaAnng12480D,BnaA05g00500D,BnaC08g25810D,BnaA06g17140D,BnaA06g33410D,BnaA07g12540D,BnaA09g55010D,BnaA03g46210D,BnaC03g12990D,BnaC01g34580D,BnaC03g57220D,BnaAnng10700D,BnaC01g17820D,BnaC09g15740D,BnaC07g14260D,BnaA10g13460D,BnaC06g09170D,BnaA09g49740D,BnaA03g07570D,BnaC06g38200D,BnaA09g28980D,BnaA08g21180D,BnaC09g52550D,BnaC04g51940D,BnaC04g26110D,BnaC03g26070D,BnaA03g04930D,BnaA07g…
GO:0030145	manganese ion binding	molecular_function	83	39262	0.161252	0.22992	1.05215	BnaA01g07350D,BnaC05g01100D,BnaAnng02990D,BnaA09g39580D,BnaC08g09710D,BnaA08g26300D,BnaC08g31950D,BnaC03g30360D,BnaA06g05460D,BnaA09g48900D,BnaC02g46770D,BnaC08g47570D,BnaC06g13030D,BnaA07g37570D,BnaA01g31980D,BnaC06g05520D,BnaA02g01720D,BnaCnng52940D,BnaA02g04970D,BnaC03g34440D,BnaA09g41570D,BnaC06g26560D,BnaC05g45900D,BnaC08g43180D,BnaA08g26980D,BnaC01g38860D,BnaA05g29640D,BnaA08g30120D,BnaC05g…
GO:0016762	xyloglucan:xyloglucosyl transferase activity	molecular_function	81	39262	0.000945707	0.00206199	1.17812	BnaC03g67960D,BnaA01g06750D,BnaA01g15000D,BnaC07g42520D,BnaA06g07180D,BnaA08g06970D,BnaA03g50050D,BnaA09g01390D,BnaC07g02990D,BnaAnng03530D,BnaC07g39910D,BnaA03g10220D,BnaA03g47620D,BnaA02g35260D,BnaA07g01590D,BnaC01g11500D,BnaC04g08400D,BnaA10g11500D,BnaA02g22470D,BnaA03g25760D,BnaC01g08120D,BnaC03g55190D,BnaA03g38180D,BnaA03g43870D,BnaCnng62600D,BnaC02g11500D,BnaC02g11480D,BnaC03g67970D,BnaCnng…
GO:0008483	transaminase activity	molecular_function	81	39262	0.0107423	0.0202835	1.13052	BnaA01g04910D,BnaA04g28670D,BnaC07g43610D,BnaC07g38390D,BnaC03g76360D,BnaC03g46060D,BnaA09g06670D,BnaC09g32740D,BnaC04g41630D,BnaA03g46070D,BnaA01g24820D,BnaC01g15060D,BnaA02g09960D,BnaC01g06460D,BnaA06g36140D,BnaAnng31450D,BnaC02g13860D,BnaC03g04830D,BnaA03g56490D,BnaA08g10670D,BnaC04g54310D,BnaC02g46570D,BnaC01g00550D,BnaC01g10040D,BnaA02g04300D,BnaA01g05670D,BnaCnng33690D,BnaA09g10660D,BnaA03g…
GO:0008080	N-acetyltransferase activity	molecular_function	79	39262	0.00266139	0.00550356	1.16125	BnaA04g04040D,BnaA03g18310D,BnaC04g42720D,BnaC03g13320D,BnaA05g06530D,BnaA04g27720D,BnaA05g10960D,BnaC04g29990D,BnaC05g29050D,BnaA03g54190D,BnaA05g10930D,BnaA05g16470D,BnaC03g27760D,BnaC06g05060D,BnaC05g38560D,BnaA09g29830D,BnaA03g23430D,BnaA10g17680D,BnaA08g22670D,BnaC05g50810D,BnaCnng53710D,BnaA07g04340D,BnaA10g21140D,BnaA03g10630D,BnaC03g21820D,BnaA03g54100D,BnaC07g46690D,BnaC04g42730D,BnaA05g…
GO:0008146	sulfotransferase activity	molecular_function	79	39262	0.911193	0.975896	0.917292	BnaA03g01880D,BnaA09g14840D,BnaA09g10820D,BnaAnng15430D,BnaC06g34990D,BnaA06g12720D,BnaC09g22120D,BnaA03g40880D,BnaA07g22400D,BnaC03g02410D,BnaC03g02390D,BnaA02g27290D,BnaC06g34930D,BnaAnng27200D,BnaA09g53470D,BnaA07g31250D,BnaC09g15480D,BnaA06g04490D,BnaCnng14860D,BnaA03g55570D,BnaA08g18560D,BnaC03g56620D,BnaC06g24260D,BnaAnng33290D,BnaA09g12870D,BnaA09g31260D,BnaA03g01890D,BnaA09g14040D,BnaCnng…
GO:0015078	hydrogen ion transmembrane transporter activity	molecular_function	78	39262	0.0100126	0.0192073	1.13448	BnaA01g04740D,BnaC09g10940D,BnaA09g46810D,BnaC04g10930D,BnaC08g12260D,BnaC04g28140D,BnaC04g33510D,BnaC04g28290D,BnaA09g02330D,BnaA01g34180D,BnaC03g67270D,BnaC07g32820D,BnaCnng12890D,BnaC07g33080D,BnaA01g04510D,BnaC09g01810D,BnaC08g23600D,BnaA01g15410D,BnaA02g09150D,BnaA03g41740D,BnaC01g18940D,BnaUnng03950D,BnaCnng42810D,BnaA06g07880D,BnaA01g15850D,BnaC04g35070D,BnaA03g22140D,BnaA01g07360D,BnaC07g…
GO:0016301	kinase activity	molecular_function	77	39262	0.0190724	0.0341186	1.11994	BnaC08g00590D,BnaC09g25860D,BnaA10g02520D,BnaC08g07850D,BnaA06g32350D,BnaC09g32570D,BnaA07g12860D,BnaA07g29470D,BnaC09g03160D,BnaCnng08580D,BnaCnng22200D,BnaCnng27780D,BnaAnng25950D,BnaC05g42340D,BnaA02g04650D,BnaA08g19620D,BnaC03g70860D,BnaA09g08890D,BnaC02g48400D,BnaC06g32670D,BnaA02g31160D,BnaA10g10190D,BnaA02g16610D,BnaA01g35130D,BnaC03g32380D,BnaA02g31620D,BnaA03g07860D,BnaCnng29680D,BnaA08g…
GO:0004175	endopeptidase activity	molecular_function	76	39262	3.8e-09	9.6e-09	1.32927	BnaA05g17000D,BnaC04g18160D,BnaA02g19190D,BnaC05g09110D,BnaA08g24440D,BnaA01g05950D,BnaC04g17530D,BnaA04g01060D,BnaA03g22250D,BnaA06g15450D,BnaA09g31830D,BnaA08g03990D,BnaA09g15700D,BnaAnng29850D,BnaC08g22660D,BnaC04g38540D,BnaC06g41960D,BnaA06g32120D,BnaC03g67700D,BnaC03g56940D,BnaA05g14110D,BnaC09g17140D,BnaA07g20430D,BnaAnng21900D,BnaA01g18920D,BnaC07g04250D,BnaC06g39610D,BnaA07g34730D,BnaA07g…
GO:0008171	O-methyltransferase activity	molecular_function	76	39262	0.749335	0.838032	0.954659	BnaA03g48770D,BnaC07g45440D,BnaC01g20310D,BnaC09g30560D,BnaA01g10820D,BnaA08g19210D,BnaCnng11480D,BnaA08g11640D,BnaA02g09810D,BnaA01g15410D,BnaC01g18300D,BnaC02g17730D,BnaA08g10840D,BnaA07g11080D,BnaA07g33060D,BnaAnng16070D,BnaC03g77170D,BnaC05g16380D,BnaC06g21620D,BnaC05g16350D,BnaC08g07370D,BnaC08g19680D,BnaA03g11990D,BnaA09g39560D,BnaA01g10830D,BnaAnng10770D,BnaC08g10380D,BnaA10g07270D,BnaC02g…
GO:0016597	amino acid binding	molecular_function	74	39262	5.28e-05	0.00012531	1.23192	BnaCnng23380D,BnaA05g18730D,BnaC04g46450D,BnaC07g44840D,BnaC01g04190D,BnaA03g27210D,BnaA07g27660D,BnaCnng21170D,BnaC07g22520D,BnaA01g34990D,BnaA02g35780D,BnaA06g27610D,BnaA01g12490D,BnaC07g29440D,BnaA08g11320D,BnaA07g21750D,BnaC06g42410D,BnaAnng32540D,BnaA02g27260D,BnaA08g25130D,BnaC03g35390D,BnaA07g33230D,BnaA09g25320D,BnaA07g02330D,BnaA06g08160D,BnaC08g15080D,BnaA05g29990D,BnaC03g59990D,BnaC05g…
GO:0003755	peptidyl-prolyl cis-trans isomerase activity	molecular_function	74	39262	0.010808	0.0202835	1.1361	BnaCnng08980D,BnaC01g03590D,BnaC01g21230D,BnaC04g41460D,BnaC08g48540D,BnaA08g16920D,BnaC04g41430D,BnaC01g03530D,BnaC03g71020D,BnaA08g07170D,BnaC08g08050D,BnaA05g08140D,BnaA10g29520D,BnaC04g45890D,BnaA03g04200D,BnaC01g05170D,BnaA03g21710D,BnaA08g08200D,BnaA02g07550D,BnaA04g22160D,BnaAnng15590D,BnaC03g25990D,BnaC07g47630D,BnaA08g10930D,BnaC03g12390D,BnaA01g17950D,BnaC03g60160D,BnaA09g35540D,BnaC08g…
GO:0003993	acid phosphatase activity	molecular_function	73	39262	0.994137	1	0.847624	BnaA09g16850D,BnaA09g08700D,BnaC08g23980D,BnaC03g46400D,BnaC08g40040D,BnaA08g27690D,BnaA06g05800D,BnaA09g33200D,BnaC04g38420D,BnaA09g46120D,BnaC09g38910D,BnaC08g42510D,BnaC03g32510D,BnaC07g41870D,BnaC03g06720D,BnaA09g50710D,BnaC08g08080D,BnaA08g13480D,BnaC02g28490D,BnaA01g07590D,BnaUnng02540D,BnaC05g44840D,BnaC04g05450D,BnaC01g16730D,BnaA03g17920D,BnaA03g15100D,BnaC03g46270D,BnaCnng46140D,BnaCnng…
GO:0005216	ion channel activity	molecular_function	72	39262	0.0374599	0.0630984	1.10539	BnaA04g14030D,BnaA03g50250D,BnaA03g28160D,BnaA06g32380D,BnaC04g16000D,BnaC08g33320D,BnaC04g36270D,BnaA09g17910D,BnaA03g57170D,BnaA07g15180D,BnaA04g11860D,BnaC06g07440D,BnaC06g16330D,BnaA01g06670D,BnaC04g37620D,BnaA09g41300D,BnaCnng16060D,BnaA02g28670D,BnaC03g31050D,BnaCnng47090D,BnaC07g42730D,BnaA05g22550D,BnaC04g38170D,BnaC04g33870D,BnaA04g14530D,BnaA10g18740D,BnaA06g36090D,BnaC09g00810D,BnaC03g…
GO:0008233	peptidase activity	molecular_function	70	39262	0.000129952	0.000301752	1.22433	BnaC04g05410D,BnaA02g31150D,BnaA01g28550D,BnaA03g56570D,BnaAnng32770D,BnaC07g37760D,BnaC08g25470D,BnaC02g43720D,BnaC06g42930D,BnaA10g25390D,BnaA07g38220D,BnaC03g34180D,BnaC01g35840D,BnaA04g22730D,BnaC09g03160D,BnaC01g00920D,BnaCnng02060D,BnaC02g08980D,BnaA04g03970D,BnaC04g05300D,BnaC06g09860D,BnaA05g23810D,BnaC05g27940D,BnaA05g31930D,BnaC09g50420D,BnaA03g26940D,BnaA07g25020D,BnaC04g46750D,BnaC06g…
GO:0008378	galactosyltransferase activity	molecular_function	70	39262	0.231735	0.314853	1.04002	BnaC09g32770D,BnaC03g51620D,BnaA10g27620D,BnaA05g29310D,BnaC08g20240D,BnaC07g40490D,BnaA01g32830D,BnaA10g06690D,BnaC06g38340D,BnaC05g51320D,BnaA04g21840D,BnaCnng29350D,BnaC04g38250D,BnaA05g06500D,BnaC01g12450D,BnaA08g14250D,BnaC06g22770D,BnaA01g30130D,BnaC04g07170D,BnaCnng24210D,BnaA05g24590D,BnaA01g04800D,BnaA07g33720D,BnaA07g09130D,BnaC01g38080D,BnaA05g10880D,BnaC05g19620D,BnaC02g14380D,BnaA03g…
GO:0008236	serine-type peptidase activity	molecular_function	67	39262	0.355798	0.454493	1.01733	BnaA03g14320D,BnaC05g15740D,BnaC04g51960D,BnaC08g45000D,BnaA06g24710D,BnaC07g34690D,BnaA01g28550D,BnaA06g02850D,BnaC06g03570D,BnaA10g25390D,BnaC03g17310D,BnaA04g17540D,BnaC01g35840D,BnaC05g04270D,BnaCnng28400D,BnaA07g05460D,BnaA08g30180D,BnaAnng08440D,BnaCnng24190D,BnaA01g06150D,BnaA01g19230D,BnaA09g07650D,BnaC08g01690D,BnaC09g50420D,BnaC04g51330D,BnaC09g04490D,BnaC06g36830D,BnaC01g39260D,BnaA07g…
GO:0042802	identical protein binding	molecular_function	62	39262	1	1	0.639314	BnaA09g25920D,BnaA02g07220D,BnaA02g26740D,BnaA03g57660D,BnaA09g52920D,BnaA10g00170D,BnaAnng25710D,BnaC01g37240D,BnaAnng10120D,BnaC01g08350D,BnaA05g25390D,BnaC02g29110D,BnaA09g24110D,BnaA01g10620D,BnaA05g25190D,BnaC07g01060D,BnaC04g38660D,BnaC09g24660D,BnaC07g04280D,BnaAnng14520D,BnaC09g01070D,BnaC02g10210D,BnaC07g02390D,BnaC09g18640D,BnaC06g32960D,BnaC07g15930D,BnaC05g39370D,BnaC02g29120D,BnaA03g…
GO:0019843	rRNA binding	molecular_function	58	39262	0.000251465	0.000573383	1.23294	BnaA02g21980D,BnaC06g08730D,BnaA03g34930D,BnaC05g12790D,BnaC03g48390D,BnaC09g17540D,BnaC05g03230D,BnaA03g06760D,BnaC03g07320D,BnaA02g03760D,BnaC02g30260D,BnaC02g41170D,BnaA10g16930D,BnaC09g24510D,BnaC05g19970D,BnaA10g18910D,BnaA09g12200D,BnaA06g19360D,BnaA01g27320D,BnaA02g22240D,BnaC03g40680D,BnaC08g17030D,BnaA05g21400D,BnaC02g06220D,BnaC02g05940D,BnaCnng39020D,BnaA09g50400D,BnaC09g40040D,BnaA10g…
GO:0004725	protein tyrosine phosphatase activity	molecular_function	58	39262	0.0037697	0.00759483	1.17855	BnaAnng00980D,BnaA03g40730D,BnaC04g09400D,BnaC09g52050D,BnaC04g44700D,BnaC02g02660D,BnaA05g08340D,BnaC05g03030D,BnaA07g04540D,BnaC04g25620D,BnaC03g00320D,BnaC03g04490D,BnaC04g11740D,BnaA10g25650D,BnaC09g22970D,BnaA04g19120D,BnaC03g19530D,BnaC03g33150D,BnaCnng24280D,BnaC01g33400D,BnaC09g33180D,BnaA01g31580D,BnaCnng41960D,BnaAnng12460D,BnaCnng56880D,BnaA07g29650D,BnaA03g16260D,BnaC09g41450D,BnaC04g…
GO:0003746	translation elongation factor activity	molecular_function	57	39262	0.00915022	0.0175735	1.15823	BnaA09g26350D,BnaC09g00290D,BnaC09g44570D,BnaC03g30500D,BnaCnng74170D,BnaCnng34540D,BnaC07g12330D,BnaA03g24550D,BnaA02g06370D,BnaC08g42630D,BnaC05g37640D,BnaC04g03930D,BnaA07g09420D,BnaA05g29470D,BnaC09g26150D,BnaC04g13200D,BnaC08g43440D,BnaA10g27720D,BnaA09g29060D,BnaC01g09420D,BnaC08g13770D,BnaA08g19830D,BnaC03g09630D,BnaA08g17480D,BnaA09g22060D,BnaA09g01140D,BnaC09g38180D,BnaC05g05630D,BnaC07g…
GO:0000976	transcription regulatory region sequence-specific DNA binding	molecular_function	56	39262	0.0342198	0.0578779	1.12141	BnaA02g34710D,BnaCnng68370D,BnaCnng05820D,BnaC01g02120D,BnaCnng70120D,BnaA09g52670D,BnaA06g39210D,BnaCnng61510D,BnaC07g16610D,BnaC05g20010D,BnaA09g42630D,BnaA07g37510D,BnaA07g24100D,BnaC06g30800D,BnaAnng23540D,BnaC04g00750D,BnaC07g34350D,BnaC01g00960D,BnaAnng04800D,BnaA02g14550D,BnaC09g07850D,BnaC02g43700D,BnaA10g18950D,BnaC08g35090D,BnaA08g20030D,BnaC03g61830D,BnaCnng67720D,BnaC06g25160D,BnaC06g…
GO:0008324	cation transmembrane transporter activity	molecular_function	56	39262	0.0342198	0.0578779	1.12141	BnaA03g21530D,BnaC04g00620D,BnaA09g37250D,BnaA04g28640D,BnaC05g00300D,BnaCnng57000D,BnaA05g01080D,BnaC05g00280D,BnaC04g40510D,BnaC04g06080D,BnaC05g12410D,BnaC04g06050D,BnaC08g28980D,BnaC03g37860D,BnaC03g28940D,BnaA03g41510D,BnaA03g32760D,BnaC02g06740D,BnaC08g38410D,BnaA04g21850D,BnaC04g26920D,BnaA05g26020D,BnaC06g39900D,BnaA07g37950D,BnaC06g11060D,BnaA04g23020D,BnaA04g26760D,BnaA05g06490D,BnaC04g…
GO:0016829	lyase activity	molecular_function	54	39262	1	1	0.606619	BnaC07g23000D,BnaA08g09430D,BnaA03g40240D,BnaA01g29320D,BnaC03g38570D,BnaCnng60530D,BnaA04g01030D,BnaA10g11530D,BnaC06g39870D,BnaC09g18750D,BnaC04g51900D,BnaAnng04280D,BnaA03g33440D,BnaC08g43060D,BnaC09g30970D,BnaA03g22980D,BnaAnng31910D,BnaA06g33330D,BnaA08g30440D,BnaC03g38580D,BnaA06g05000D,BnaC04g50190D,BnaC05g39050D,BnaC03g68510D,BnaA04g27040D,BnaC07g49880D,BnaC09g05320D,BnaC03g27100D,BnaC09g…
GO:0009982	pseudouridine synthase activity	molecular_function	52	39262	5.6e-07	1.38e-06	1.33057	BnaC06g36680D,BnaCnng07570D,BnaA03g59520D,BnaA06g14390D,BnaAnng31530D,BnaC08g42540D,BnaC05g07250D,BnaA03g06930D,BnaC03g34990D,BnaA01g33870D,BnaA07g32340D,BnaC07g32770D,BnaC01g40380D,BnaC07g15400D,BnaCnng52450D,BnaA03g41690D,BnaC03g16800D,BnaA05g06100D,BnaCnng63670D,BnaC09g43050D,BnaA09g23260D,BnaC05g15750D,BnaA03g28800D,BnaC01g13110D,BnaA03g13850D,BnaC04g06310D,BnaA10g19290D,BnaA01g11600D,BnaC02g…
GO:0005200	structural constituent of cytoskeleton	molecular_function	52	39262	0.00249624	0.00518814	1.19751	BnaC09g37880D,BnaC09g44450D,BnaA02g31320D,BnaC03g75120D,BnaA06g17780D,BnaA10g15400D,BnaCnng62490D,BnaC02g29260D,BnaA05g09090D,BnaA10g20420D,BnaC02g31030D,BnaA03g44640D,BnaC04g54460D,BnaCnng51680D,BnaC03g09740D,BnaC03g68420D,BnaC05g50610D,BnaA07g32090D,BnaC04g10450D,BnaA03g07740D,BnaA08g02320D,BnaA06g20530D,BnaA09g17090D,BnaC02g09000D,BnaA08g09560D,BnaA05g12490D,BnaA10g15410D,BnaA05g16010D,BnaC02g…
GO:0003712	transcription cofactor activity	molecular_function	52	39262	0.0373855	0.0630377	1.12267	BnaA03g51980D,BnaA02g33650D,BnaC05g49890D,BnaA09g05430D,BnaC03g51080D,BnaAnng24420D,BnaA06g11230D,BnaC08g01420D,BnaA08g28380D,BnaA06g25030D,BnaA03g54130D,BnaAnng06230D,BnaA10g03480D,BnaA06g22570D,BnaA06g16600D,BnaA06g10400D,BnaC06g33590D,BnaA08g23530D,BnaC08g16750D,BnaA01g00360D,BnaA03g32560D,BnaC08g38240D,BnaC03g48540D,BnaC05g12770D,BnaC06g39410D,BnaC07g25920D,BnaC02g01260D,BnaC07g46630D,BnaA09g…
GO:0004177	aminopeptidase activity	molecular_function	51	39262	0.00123662	0.00264026	1.21498	BnaA01g07350D,BnaC02g26390D,BnaC07g32530D,BnaA03g41480D,BnaA10g25560D,BnaC03g27790D,BnaA02g17790D,BnaA05g04640D,BnaA03g23460D,BnaA09g46410D,BnaA08g24360D,BnaC06g05520D,BnaC01g01810D,BnaA09g41570D,BnaC07g22880D,BnaC09g50740D,BnaC02g31590D,BnaC03g24720D,BnaC04g54870D,BnaA03g38590D,BnaA06g33420D,BnaA04g14130D,BnaC04g04100D,BnaC08g15780D,BnaA03g20690D,BnaC02g01380D,BnaA09g38240D,BnaC08g34140D,BnaA09g…
GO:0004568	chitinase activity	molecular_function	51	39262	0.105503	0.157535	1.08414	BnaA09g15440D,BnaCnng01370D,BnaC04g48920D,BnaA05g03430D,BnaA04g25220D,BnaC03g31740D,BnaA10g03880D,BnaCnng39650D,BnaC03g24340D,BnaC05g03990D,BnaC05g40680D,BnaC03g37570D,BnaA03g20330D,BnaC03g24310D,BnaC05g01140D,BnaC03g24290D,BnaC08g01540D,BnaC08g25210D,BnaA03g56430D,BnaA04g25230D,BnaC03g37600D,BnaA03g20340D,BnaC09g51720D,BnaA08g31740D,BnaA08g09330D,BnaC04g49100D,BnaA03g20310D,BnaA01g30550D,BnaA03g…
GO:0030247	polysaccharide binding	molecular_function	51	39262	0.980035	1	0.849023	BnaA06g08440D,BnaA06g15010D,BnaC05g16490D,BnaC05g07910D,BnaA09g56450D,BnaA05g22800D,BnaC05g16460D,BnaA08g28110D,BnaC03g32660D,BnaAnng18620D,BnaC08g38520D,BnaA02g12620D,BnaC07g14600D,BnaC05g09810D,BnaA03g23400D,BnaC03g57020D,BnaCnng03730D,BnaC07g43130D,BnaA07g11020D,BnaCnng71280D,BnaA05g22790D,BnaA09g56430D,BnaA10g27400D,BnaA09g54890D,BnaA04g29690D,BnaC08g38530D,BnaAnng18600D,BnaC05g36070D,BnaC08g…
GO:0048037	cofactor binding	molecular_function	50	39262	0.000551983	0.0012263	1.2337	BnaA07g26770D,BnaC09g42760D,BnaA07g19710D,BnaC07g44840D,BnaA03g02450D,BnaC08g41130D,BnaC01g04190D,BnaA09g47060D,BnaCnng33820D,BnaA07g23150D,BnaA10g23060D,BnaA07g35930D,BnaA08g11320D,BnaC06g33840D,BnaC09g47610D,BnaA09g03340D,BnaC05g00510D,BnaC05g03440D,BnaAnng06200D,BnaA09g47070D,BnaC08g17520D,BnaC08g41110D,BnaC03g40970D,BnaA03g50990D,BnaA02g30820D,BnaC03g03460D,BnaA06g08050D,BnaC02g01230D,BnaA10g…
GO:0042578	phosphoric ester hydrolase activity	molecular_function	50	39262	0.0297782	0.0507836	1.13258	BnaAnng15110D,BnaA08g20770D,BnaA05g10520D,BnaA06g11630D,BnaA08g29520D,BnaA07g10360D,BnaA04g03360D,BnaC08g29950D,BnaA08g29810D,BnaC05g52190D,BnaC06g17540D,BnaC02g44270D,BnaC05g13480D,BnaA07g18510D,BnaAnng19630D,BnaC08g37840D,BnaC09g08330D,BnaC05g17900D,BnaC08g26740D,BnaC08g37810D,BnaC03g28890D,BnaAnng13060D,BnaA09g37990D,BnaA09g08140D,BnaC04g25260D,BnaA09g32010D,BnaA01g29510D,BnaCnng58290D,BnaA10g…
GO:0003774	motor activity	molecular_function	50	39262	0.119162	0.175226	1.07949	BnaC09g51820D,BnaA09g44950D,BnaA03g52400D,BnaC07g00690D,BnaC05g06330D,BnaCnng51610D,BnaC07g44150D,BnaC04g23790D,BnaUnng05320D,BnaA02g10320D,BnaA06g05060D,BnaA09g16710D,BnaC03g10110D,BnaC08g00770D,BnaC02g14400D,BnaA08g26800D,BnaC03g41300D,BnaA03g35510D,BnaC01g40760D,BnaA06g02860D,BnaA02g04890D,BnaC01g04980D,BnaC08g43760D,BnaC09g30710D,BnaA04g02130D,BnaC07g17450D,BnaC08g07170D,BnaUnng05330D,BnaA06g…
GO:0045735	nutrient reservoir activity	molecular_function	50	39262	1	1	0.580564	BnaC05g01100D,BnaAnng02990D,BnaA09g39580D,BnaC08g09710D,BnaA08g26300D,BnaC08g31950D,BnaCnng38930D,BnaA06g05460D,BnaC08g47570D,BnaC06g13030D,BnaA07g37570D,BnaA01g31980D,BnaCnng52940D,BnaA02g04970D,BnaC03g34440D,BnaA10g02240D,BnaC05g45900D,BnaC01g38860D,BnaA08g30120D,BnaC05g14660D,BnaC08g09720D,BnaCnng19890D,BnaC09g16800D,BnaA10g00990D,BnaA03g40540D,BnaC03g48220D,BnaC08g42670D,BnaA01g22650D,BnaA09g…
GO:0015299	solute:proton antiporter activity	molecular_function	50	39262	1	1	0.539743	BnaA07g35030D,BnaA08g15080D,BnaA07g20250D,BnaC05g46790D,BnaC05g00300D,BnaA06g09480D,BnaC04g27020D,BnaC05g00280D,BnaUnng03660D,BnaC02g04030D,BnaC04g19510D,BnaC03g62130D,BnaA07g01120D,BnaC06g19720D,BnaC01g15520D,BnaA04g27810D,BnaA03g08710D,BnaC08g36630D,BnaC09g52290D,BnaC07g38420D,BnaA09g03600D,BnaA05g32130D,BnaA05g06980D,BnaA07g01130D,BnaCnng08900D,BnaA09g20220D,BnaA01g13360D,BnaC06g39970D,BnaC09g…
GO:0005484	SNAP receptor activity	molecular_function	49	39262	0.187922	0.263877	1.0579	BnaC06g39950D,BnaC05g06210D,BnaC09g41030D,BnaC07g32850D,BnaCnng54570D,BnaA05g27280D,BnaCnng36920D,BnaA07g05660D,BnaA06g10830D,BnaA03g41770D,BnaA03g43290D,BnaA03g06240D,BnaA09g01500D,BnaC03g08040D,BnaC08g31380D,BnaAnng02730D,BnaA06g04950D,BnaC08g38470D,BnaA01g23010D,BnaA02g24770D,BnaC09g00640D,BnaC02g06890D,BnaA05g31560D,BnaA03g31960D,BnaCnng50850D,BnaA08g18280D,BnaC05g46100D,BnaA03g37320D,BnaA02g…
GO:0031072	heat shock protein binding	molecular_function	48	39262	0.000883026	0.00193302	1.22822	BnaA05g09020D,BnaA09g05780D,BnaAnng24970D,BnaA04g12800D,BnaC04g34720D,BnaA05g06650D,BnaC02g23550D,BnaC04g37450D,BnaCnng47600D,BnaC04g55720D,BnaA03g08370D,BnaA01g20230D,BnaA07g35850D,BnaA08g18500D,BnaC03g58400D,BnaC09g05380D,BnaCnng22560D,BnaC03g57110D,BnaA06g30470D,BnaC02g38330D,BnaCnng03650D,BnaA01g27880D,BnaA10g15210D,BnaC03g10640D,BnaA02g05430D,BnaA06g17240D,BnaA05g22410D,BnaC07g49210D,BnaC09g…
GO:0003725	double-stranded RNA binding	molecular_function	48	39262	0.0056582	0.0111432	1.18435	BnaC04g39710D,BnaC04g15870D,BnaA06g10540D,BnaA06g35130D,BnaA03g00440D,BnaC02g46500D,BnaA02g19500D,BnaA01g10820D,BnaC09g50360D,BnaA10g00800D,BnaA06g05600D,BnaA10g25360D,BnaA03g44810D,BnaC05g00860D,BnaA03g08860D,BnaC07g48750D,BnaC05g47910D,BnaC05g07140D,BnaC03g64030D,BnaA01g10830D,BnaC06g02170D,BnaC05g31650D,BnaA06g03600D,BnaA04g16430D,BnaC03g00330D,BnaC09g54010D,BnaA08g26200D,BnaC01g12400D,BnaC09g…
GO:0015095	magnesium ion transmembrane transporter activity	molecular_function	48	39262	0.0119853	0.02234	1.16357	BnaA09g55390D,BnaC02g25960D,BnaC02g20850D,BnaA06g10710D,BnaA10g20650D,BnaC07g23760D,BnaC01g33220D,BnaAnng21200D,BnaC03g60150D,BnaC05g34100D,BnaAnng21960D,BnaC08g36020D,BnaA06g23540D,BnaCnng47920D,BnaCnng30470D,BnaA06g32730D,BnaA07g35210D,BnaA02g19370D,BnaC06g06680D,BnaA02g15640D,BnaA08g16930D,BnaA10g13720D,BnaA04g06610D,BnaC09g44670D,BnaA04g11960D,BnaC09g06390D,BnaC05g12220D,BnaA06g39860D,BnaC02g…
GO:0004519	endonuclease activity	molecular_function	47	39262	9.35e-05	0.000218353	1.27337	BnaA08g12640D,BnaA01g11450D,BnaAnng33860D,BnaC01g12910D,BnaC01g02590D,BnaC08g44470D,BnaC03g03250D,BnaA04g23940D,BnaC03g77020D,BnaA07g26950D,BnaC07g24890D,BnaCnng63000D,BnaA01g11460D,BnaA05g07800D,BnaC04g08810D,BnaA09g15890D,BnaA09g47700D,BnaC06g29430D,BnaC09g29510D,BnaC09g30690D,BnaC05g46570D,BnaA08g09680D,BnaA06g31700D,BnaA03g02230D,BnaCnng15150D,BnaA03g19480D,BnaA09g50180D,BnaC08g37070D,BnaA10g…
GO:0003887	DNA-directed DNA polymerase activity	molecular_function	47	39262	0.0476022	0.0779463	1.11969	BnaC03g67000D,BnaAnng05280D,BnaA03g46930D,BnaAnng16990D,BnaAnng15090D,BnaA08g25700D,BnaC04g48110D,BnaA01g09650D,BnaA06g04690D,BnaA06g23100D,BnaA02g13280D,BnaC03g50300D,BnaA08g12070D,BnaC02g17390D,BnaC05g32360D,BnaA03g38520D,BnaC08g14330D,BnaA03g22490D,BnaA01g04290D,BnaC07g18620D,BnaA05g15640D,BnaC07g21790D,BnaAnng05750D,BnaA09g54770D,BnaCnng36760D,BnaA04g24310D,BnaC05g26940D,BnaC09g18610D,BnaC07g…
GO:0008237	metallopeptidase activity	molecular_function	46	39262	3.49e-06	8.5e-06	1.32417	BnaC03g19380D,BnaA09g14350D,BnaA03g56420D,BnaA05g04520D,BnaA07g23960D,BnaCnng34250D,BnaA03g44400D,BnaA07g31100D,BnaC06g26610D,BnaC06g28770D,BnaC04g20490D,BnaC06g01820D,BnaA06g40880D,BnaC02g00250D,BnaAnng17940D,BnaA02g00600D,BnaA07g24910D,BnaA09g29750D,BnaA06g24520D,BnaC09g14910D,BnaC06g34770D,BnaC03g66770D,BnaC04g03940D,BnaA08g11910D,BnaA10g19840D,BnaA02g01700D,BnaC07g36250D,BnaC01g05150D,BnaC06g…
GO:0004707	MAP kinase activity	molecular_function	46	39262	2.5e-05	6e-05	1.29715	BnaA05g03140D,BnaA07g22580D,BnaCnng17720D,BnaA02g26910D,BnaC06g06380D,BnaA05g22170D,BnaC03g55440D,BnaC03g31910D,BnaA09g18630D,BnaC07g20800D,BnaCnng35780D,BnaA05g03550D,BnaA07g01930D,BnaC03g23890D,BnaC03g09450D,BnaC02g47660D,BnaA05g14400D,BnaA06g18440D,BnaC01g28210D,BnaA01g21880D,BnaA09g21830D,BnaA06g12330D,BnaA09g09520D,BnaC09g24030D,BnaC09g38840D,BnaC08g37390D,BnaC05g38860D,BnaC08g43500D,BnaC04g…
GO:0031418	L-ascorbic acid binding	molecular_function	46	39262	0.0172654	0.0311574	1.15564	BnaA06g31460D,BnaCnng30110D,BnaA04g24820D,BnaA06g25630D,BnaC03g47960D,BnaA03g29370D,BnaC02g08370D,BnaA08g20710D,BnaA05g31030D,BnaC09g08270D,BnaA09g11660D,BnaA08g04730D,BnaC03g40440D,BnaC05g18240D,BnaC09g38980D,BnaA08g21870D,BnaC09g52920D,BnaC07g06600D,BnaAnng18690D,BnaC07g39800D,BnaC09g01700D,BnaC05g45530D,BnaA07g02890D,BnaC08g47290D,BnaA06g14340D,BnaC03g34650D,BnaA05g34430D,BnaC05g35150D,BnaC03g…
GO:0048038	quinone binding	molecular_function	46	39262	0.407095	0.503206	1.00889	BnaC03g05050D,BnaC04g05360D,BnaA03g19840D,BnaC03g72290D,BnaC03g69740D,BnaA06g21880D,BnaA07g31740D,BnaC03g23740D,BnaA07g14840D,BnaCnng48520D,BnaA08g04210D,BnaA03g54620D,BnaCnng13080D,BnaC06g35620D,BnaA08g07750D,BnaAnng24490D,BnaA03g18810D,BnaC08g47490D,BnaC01g22650D,BnaCnng45980D,BnaAnng10300D,BnaC08g04880D,BnaA06g20480D,BnaC04g48360D,BnaC04g20180D,BnaA09g10720D,BnaA02g34960D,BnaA06g22110D,BnaC09g…
GO:0016874	ligase activity	molecular_function	45	39262	0.000159147	0.000368505	1.26895	BnaA03g17570D,BnaAnng01550D,BnaCnng49180D,BnaA06g28850D,BnaC08g06560D,BnaC05g37990D,BnaA06g06030D,BnaA03g37290D,BnaC02g02140D,BnaA05g06620D,BnaC03g02330D,BnaA09g50980D,BnaC09g49420D,BnaC03g66410D,BnaA09g11110D,BnaA10g24530D,BnaC03g21010D,BnaC07g44680D,BnaC01g38830D,BnaC04g07230D,BnaC05g07580D,BnaC03g43600D,BnaC05g26620D,BnaC01g04490D,BnaA03g50840D,BnaA08g11650D,BnaA03g01800D,BnaA09g48250D,BnaA08g…
GO:0003684	damaged DNA binding	molecular_function	45	39262	0.00176498	0.00372959	1.21919	BnaAnng05280D,BnaA10g14690D,BnaC05g12320D,BnaC05g13070D,BnaA04g08670D,BnaA05g14830D,BnaA06g25920D,BnaC02g16350D,BnaC03g10310D,BnaCnng32650D,BnaA01g02130D,BnaC02g13830D,BnaA02g09880D,BnaC04g30910D,BnaC03g33000D,BnaA07g14440D,BnaA02g03190D,BnaCnng36760D,BnaA07g20230D,BnaA06g11440D,BnaC09g37020D,BnaC05g46570D,BnaA06g10810D,BnaC03g27770D,BnaC05g17040D,BnaA09g56400D,BnaC03g00010D,BnaA03g23440D,BnaC06g…
GO:0008601	protein phosphatase type 2A regulator activity	molecular_function	45	39262	0.0206466	0.0362638	1.15145	BnaC01g31410D,BnaC03g35810D,BnaA06g03480D,BnaA05g28660D,BnaA07g16560D,BnaA06g08530D,BnaC06g08970D,BnaC05g43110D,BnaA08g22990D,BnaA01g18630D,BnaC07g23190D,BnaC06g04750D,BnaA09g44840D,BnaC06g15500D,BnaA05g15320D,BnaAnng00670D,BnaC04g27230D,BnaA01g24050D,BnaA02g31940D,BnaA06g11930D,BnaA08g01840D,BnaA06g27770D,BnaC05g09900D,BnaC05g30730D,BnaC05g49990D,BnaC07g32950D,BnaC02g35870D,BnaA06g02170D,BnaA02g…
GO:0004970	ionotropic glutamate receptor activity	molecular_function	45	39262	0.913943	0.977569	0.888263	BnaA03g14960D,BnaA05g10840D,BnaC02g38550D,BnaA02g00890D,BnaC04g23810D,BnaC09g02410D,BnaA10g26130D,BnaA04g16910D,BnaA01g33670D,BnaC04g37100D,BnaA09g32030D,BnaA06g30230D,BnaCnng22760D,BnaC08g44070D,BnaA09g02980D,BnaC05g03240D,BnaCnng51940D,BnaA09g02950D,BnaC04g12400D,BnaA09g50380D,BnaA04g16920D,BnaC08g05620D,BnaCnng32830D,BnaC07g26470D,BnaA05g13030D,BnaA02g30130D,BnaAnng26240D,BnaA09g03000D,BnaA01g…
GO:0005234	extracellular-glutamate-gated ion channel activity	molecular_function	45	39262	0.913943	0.977569	0.888263	BnaA03g14960D,BnaA05g10840D,BnaC02g38550D,BnaA02g00890D,BnaC04g23810D,BnaC09g02410D,BnaA10g26130D,BnaA04g16910D,BnaA01g33670D,BnaC04g37100D,BnaA09g32030D,BnaA06g30230D,BnaCnng22760D,BnaC08g44070D,BnaA09g02980D,BnaC05g03240D,BnaCnng51940D,BnaA09g02950D,BnaC04g12400D,BnaA09g50380D,BnaA04g16920D,BnaC08g05620D,BnaCnng32830D,BnaC07g26470D,BnaA05g13030D,BnaA02g30130D,BnaAnng26240D,BnaA09g03000D,BnaA01g…
GO:0008289	lipid binding	molecular_function	45	39262	0.994191	1	0.807512	BnaC02g10060D,BnaC04g51000D,BnaA10g03120D,BnaC04g45500D,BnaC03g36390D,BnaA03g17860D,BnaA02g34050D,BnaA05g29430D,BnaA03g09540D,BnaA09g32110D,BnaC03g50130D,BnaC07g32300D,BnaCnng42990D,BnaA04g22070D,BnaC05g31760D,BnaA03g31060D,BnaC01g23300D,BnaAnng27610D,BnaC08g22920D,BnaA01g19350D,BnaC05g02990D,BnaC04g45800D,BnaA04g21650D,BnaA04g22080D,BnaA06g23230D,BnaA05g18780D,BnaA02g07120D,BnaA03g38500D,BnaA04g…
GO:0004518	nuclease activity	molecular_function	44	39262	0.00221552	0.00461052	1.21593	BnaA08g22780D,BnaA09g20790D,BnaC05g15250D,BnaC09g35520D,BnaAnng33860D,BnaC06g28680D,BnaCnng56400D,BnaC04g33140D,BnaA07g07810D,BnaCnng09520D,BnaC07g09760D,BnaC01g02590D,BnaC08g27100D,BnaA04g23940D,BnaC08g40100D,BnaA01g20550D,BnaC07g24890D,BnaA06g13820D,BnaCnng53830D,BnaA09g42800D,BnaC08g35310D,BnaC07g28700D,BnaC08g40020D,BnaCnng08930D,BnaC03g11270D,BnaA06g31700D,BnaC01g25840D,BnaA03g19480D,BnaA01g…
GO:0008137	NADH dehydrogenase (ubiquinone) activity	molecular_function	44	39262	0.115277	0.169968	1.08566	BnaA05g32350D,BnaC03g05050D,BnaC09g20920D,BnaC01g19130D,BnaC07g21920D,BnaA01g16040D,BnaC09g29190D,BnaC09g16420D,BnaA06g09280D,BnaAnng22240D,BnaC04g49930D,BnaA02g26170D,BnaC08g16170D,BnaC07g33020D,BnaA02g26460D,BnaCnng12800D,BnaCnng18330D,BnaC09g27560D,BnaA06g34370D,BnaC07g21440D,BnaC02g18050D,BnaC02g34290D,BnaA08g14230D,BnaA01g34280D,BnaA02g34960D,BnaCnng06230D,BnaC09g26850D,BnaC02g34580D,BnaC09g…
GO:0018024	histone-lysine N-methyltransferase activity	molecular_function	44	39262	0.305779	0.397078	1.03045	BnaC03g06140D,BnaA07g33020D,BnaC03g01840D,BnaC04g43670D,BnaA05g03780D,BnaA03g18800D,BnaC06g43880D,BnaA07g33460D,BnaA05g32760D,BnaC06g37540D,BnaC09g50300D,BnaC06g43300D,BnaC07g17530D,BnaC04g03390D,BnaA03g04610D,BnaC02g02520D,BnaA04g13850D,BnaA07g22850D,BnaA04g13190D,BnaC03g72270D,BnaA08g12860D,BnaC09g50310D,BnaC05g48060D,BnaC08g24970D,BnaC05g47290D,BnaC02g30730D,BnaC04g10170D,BnaA09g34050D,BnaA04g…
GO:0004197	cysteine-type endopeptidase activity	molecular_function	44	39262	0.550253	0.64847	0.980592	BnaC01g05300D,BnaCnng10270D,BnaC06g39720D,BnaA02g36200D,BnaCnng45130D,BnaA07g34810D,BnaA09g52180D,BnaA09g10690D,BnaC05g06340D,BnaA07g20380D,BnaC03g49950D,BnaC08g38390D,BnaC06g39730D,BnaAnng17710D,BnaA09g10600D,BnaC06g39700D,BnaA07g34820D,BnaA01g04000D,BnaCnng01440D,BnaA06g05070D,BnaC08g33220D,BnaC07g07560D,BnaAnng16050D,BnaC09g10960D,BnaCnng73810D,BnaC08g44710D,BnaCnng10260D,BnaC06g39740D,BnaC09g…
GO:0008017	microtubule binding	molecular_function	43	39262	0.0521298	0.0847689	1.12104	BnaC05g21560D,BnaC09g31680D,BnaA09g47720D,BnaA10g09470D,BnaC07g16060D,BnaC03g74810D,BnaC07g30810D,BnaA03g11490D,BnaAnng21840D,BnaC01g18970D,BnaA09g27700D,BnaC02g07280D,BnaC08g42170D,BnaA01g15880D,BnaA04g15970D,BnaC04g55380D,BnaA02g03560D,BnaA09g07480D,BnaA08g14310D,BnaA01g35940D,BnaA06g21940D,BnaC03g57140D,BnaA02g33430D,BnaC09g07360D,BnaC02g13200D,BnaA06g34430D,BnaC03g03550D,BnaC08g12300D,BnaA06g…
GO:0005516	calmodulin binding	molecular_function	43	39262	0.130951	0.192218	1.08027	BnaC03g41960D,BnaA10g11120D,BnaC03g50210D,BnaA03g49860D,BnaCnng10440D,BnaC08g28250D,BnaC02g42140D,BnaC04g31420D,BnaC09g48040D,BnaA03g54160D,BnaC03g58140D,BnaC04g06540D,BnaC03g61330D,BnaC07g42210D,BnaC03g21650D,BnaA09g36660D,BnaA01g25310D,BnaA03g36090D,BnaA10g23390D,BnaC07g46660D,BnaA01g07100D,BnaC02g11860D,BnaC03g03260D,BnaA05g06290D,BnaCnng07470D,BnaA07g17260D,BnaC09g06210D,BnaC01g32200D,BnaA02g…
GO:0016760	cellulose synthase (UDP-forming) activity	molecular_function	43	39262	0.998634	1	0.771623	BnaC07g50180D,BnaA06g36370D,BnaA09g06990D,BnaA10g17590D,BnaA03g06610D,BnaC07g17610D,BnaC09g06600D,BnaC09g40960D,BnaC01g06090D,BnaA03g55860D,BnaA01g04600D,BnaC06g11110D,BnaAnng01240D,BnaC05g01400D,BnaA05g32300D,BnaA03g58390D,BnaC03g02050D,BnaA05g13550D,BnaC05g28920D,BnaA10g01360D,BnaC03g49550D,BnaC02g02440D,BnaC02g44220D,BnaCnng06180D,BnaA03g55200D,BnaA08g04980D,BnaC02g43280D,BnaC03g08460D,BnaC03g…
GO:0052716	hydroquinone:oxygen oxidoreductase activity	molecular_function	42	39262	0.00347135	0.00700234	1.20903	BnaCnng57030D,BnaCnng02950D,BnaA10g26680D,BnaAnng08030D,BnaC04g07220D,BnaC04g14580D,BnaC02g03260D,BnaA05g05410D,BnaA04g21810D,BnaC08g17780D,BnaA04g27180D,BnaC09g49940D,BnaA10g25010D,BnaA03g09140D,BnaA03g00500D,BnaC04g45660D,BnaA05g12170D,BnaA02g06580D,BnaC09g47160D,BnaA04g17380D,BnaC02g02320D,BnaC03g00480D,BnaC04g54790D,BnaCnng24340D,BnaC09g48310D,BnaC04g50890D,BnaC02g03650D,BnaC04g41010D,BnaA08g…
GO:0000155	phosphorelay sensor kinase activity	molecular_function	42	39262	0.0180989	0.0324478	1.16066	BnaA08g16660D,BnaA06g34070D,BnaC04g51810D,BnaC03g39830D,BnaA10g21570D,BnaCnng19880D,BnaC07g21260D,BnaA05g22950D,BnaA06g34500D,BnaC08g42660D,BnaA07g25770D,BnaA10g29230D,BnaA07g08880D,BnaA09g48410D,BnaC03g04510D,BnaA01g08940D,BnaC01g40810D,BnaC07g06920D,BnaA07g03050D,BnaAnng24980D,BnaA02g07840D,BnaA06g05470D,BnaCnng17850D,BnaC03g44990D,BnaA03g37960D,BnaCnng68200D,BnaC09g45760D,BnaC05g36390D,BnaA05g…
GO:0004427	inorganic diphosphatase activity	molecular_function	41	39262	0.000454541	0.00101255	1.25892	BnaA09g33870D,BnaAnng37560D,BnaC02g27940D,BnaA08g14280D,BnaA06g10340D,BnaC08g49780D,BnaCnng66360D,BnaA10g22430D,BnaA09g51600D,BnaC09g46990D,BnaC06g39350D,BnaC05g11930D,BnaA02g00090D,BnaA04g26810D,BnaCnng64390D,BnaC08g38730D,BnaA10g00790D,BnaC04g51570D,BnaCnng43100D,BnaC06g40530D,BnaAnng33120D,BnaA09g56670D,BnaCnng01560D,BnaA02g20410D,BnaC04g00590D,BnaC08g16730D,BnaA09g51480D,BnaA07g01950D,BnaA03g…
GO:0008235	metalloexopeptidase activity	molecular_function	41	39262	0.0103592	0.0197113	1.18024	BnaC02g26390D,BnaC07g32530D,BnaA03g41480D,BnaA02g17790D,BnaA05g04640D,BnaA09g46410D,BnaA08g24360D,BnaC06g05520D,BnaC01g01810D,BnaA09g41570D,BnaC07g22880D,BnaC02g31590D,BnaC03g24720D,BnaA06g33420D,BnaA04g14130D,BnaC04g04100D,BnaC08g15780D,BnaA03g20690D,BnaC02g01380D,BnaA09g38240D,BnaC08g34140D,BnaA09g32360D,BnaA04g01450D,BnaC01g07500D,BnaA01g18590D,BnaC06g17640D,BnaC01g23260D,BnaA07g18610D,BnaC08g…
GO:0019904	protein domain specific binding	molecular_function	40	39262	0.259565	0.348631	1.04283	BnaC07g13820D,BnaC05g20320D,BnaC08g01530D,BnaC09g06980D,BnaA07g10560D,BnaC09g46090D,BnaA03g56710D,BnaA02g00540D,BnaC06g38800D,BnaC03g32980D,BnaA07g34180D,BnaA07g10500D,BnaC03g48970D,BnaA09g52470D,BnaC05g17440D,BnaCnng72220D,BnaA04g08680D,BnaC06g20480D,BnaC03g23800D,BnaA09g28950D,BnaC04g02240D,BnaC01g43490D,BnaA03g27950D,BnaA07g14450D,BnaA05g33430D,BnaAnng29600D,BnaC07g13790D,BnaA03g02930D,BnaCnng…
GO:0004129	cytochrome-c oxidase activity	molecular_function	40	39262	0.339931	0.435239	1.02351	BnaA05g23920D,BnaC05g37720D,BnaAnng26290D,BnaA03g58550D,BnaC01g20600D,BnaC04g21290D,BnaA03g48980D,BnaC03g64400D,BnaC01g35930D,BnaC03g39200D,BnaC07g36560D,BnaA04g28190D,BnaCnng12780D,BnaC01g12490D,BnaA05g23900D,BnaA01g16860D,BnaAnng38290D,BnaCnng60170D,BnaCnng12720D,BnaA08g15810D,BnaC08g34980D,BnaC07g41190D,BnaC01g01190D,BnaA01g37030D,BnaC01g35940D,BnaC03g39210D,BnaA01g11000D,BnaA05g23910D,BnaC05g…
GO:0015450	P-P-bond-hydrolysis-driven protein transmembrane transporter activity	molecular_function	39	39262	0.0154368	0.0280731	1.17148	BnaCnng48140D,BnaA10g25270D,BnaA01g18890D,BnaA03g47010D,BnaA10g00950D,BnaA05g07100D,BnaC08g20330D,BnaA03g03460D,BnaC03g01900D,BnaC01g16760D,BnaA09g51430D,BnaC03g27880D,BnaA01g14270D,BnaC07g27840D,BnaC03g04950D,BnaA02g11680D,BnaC03g56080D,BnaA06g16430D,BnaC09g50250D,BnaA02g16120D,BnaC02g16070D,BnaA03g17200D,BnaC07g00350D,BnaC02g46290D,BnaA03g55090D,BnaA06g17900D,BnaC04g07900D,BnaA09g10320D,BnaC06g…
GO:0016844	strictosidine synthase activity	molecular_function	39	39262	0.210975	0.289277	1.05663	BnaA07g31160D,BnaC04g24610D,BnaA03g19400D,BnaA01g19460D,BnaAnng33490D,BnaC04g01800D,BnaC05g06130D,BnaC08g22830D,BnaC03g23250D,BnaA07g17130D,BnaA09g36370D,BnaCnng49900D,BnaA07g22440D,BnaC06g34850D,BnaA04g01590D,BnaA07g31170D,BnaA09g32000D,BnaC04g24620D,BnaA04g02970D,BnaC04g39030D,BnaA09g37870D,BnaCnng26110D,BnaA04g02940D,BnaC08g27950D,BnaC04g01790D,BnaA05g02120D,BnaA10g14270D,BnaC02g22590D,BnaC04g…
GO:0008138	protein tyrosine/serine/threonine phosphatase activity	molecular_function	39	39262	0.286803	0.375103	1.03631	BnaC01g10990D,BnaA03g40730D,BnaC08g23490D,BnaC04g09400D,BnaC04g44700D,BnaA05g08340D,BnaA07g04540D,BnaC04g25620D,BnaA03g27450D,BnaA01g23680D,BnaC03g00320D,BnaA05g27980D,BnaC03g19530D,BnaCnng24280D,BnaC09g33180D,BnaCnng41960D,BnaA03g16260D,BnaA05g29240D,BnaC03g32470D,BnaC07g07900D,BnaC07g31660D,BnaA01g09400D,BnaA09g32650D,BnaA04g03750D,BnaAnng19930D,BnaC05g45710D,BnaCnng19400D,BnaA05g20640D,BnaA03g…
GO:0004743	pyruvate kinase activity	molecular_function	39	39262	0.458284	0.560163	0.997926	BnaC04g22290D,BnaC03g03680D,BnaC03g50680D,BnaC02g42660D,BnaC04g23180D,BnaA03g10910D,BnaA03g36910D,BnaCnng32880D,BnaC03g43100D,BnaA06g22820D,BnaC09g42190D,BnaC09g29010D,BnaC03g13590D,BnaA10g10590D,BnaC08g24180D,BnaA01g24280D,BnaC09g06060D,BnaA10g22870D,BnaA05g35800D,BnaC09g47410D,BnaA10g00550D,BnaC02g44850D,BnaC04g22270D,BnaC06g14360D,BnaC05g28630D,BnaA10g06350D,BnaA07g15940D,BnaA03g52820D,BnaCnng…
GO:0030955	potassium ion binding	molecular_function	39	39262	0.458284	0.560163	0.997926	BnaC04g22290D,BnaC03g03680D,BnaC03g50680D,BnaC02g42660D,BnaC04g23180D,BnaA03g10910D,BnaA03g36910D,BnaCnng32880D,BnaC03g43100D,BnaA06g22820D,BnaC09g42190D,BnaC09g29010D,BnaC03g13590D,BnaA10g10590D,BnaC08g24180D,BnaA01g24280D,BnaC09g06060D,BnaA10g22870D,BnaA05g35800D,BnaC09g47410D,BnaA10g00550D,BnaC02g44850D,BnaC04g22270D,BnaC06g14360D,BnaC05g28630D,BnaA10g06350D,BnaA07g15940D,BnaA03g52820D,BnaCnng…
GO:0051087	chaperone binding	molecular_function	38	39262	0	0	1.38174	BnaA08g24960D,BnaA03g09910D,BnaA02g33160D,BnaC03g02590D,BnaA03g48280D,BnaA08g14300D,BnaA10g09440D,BnaC09g33630D,BnaC09g48390D,BnaA01g15900D,BnaC08g23110D,BnaCnng57590D,BnaA10g17040D,BnaC02g45010D,BnaC08g47050D,BnaA08g29730D,BnaA02g33140D,BnaC08g15310D,BnaC04g01000D,BnaC09g49140D,BnaC02g07400D,BnaC09g31720D,BnaA03g12820D,BnaA02g11050D,BnaC05g41030D,BnaC07g32520D,BnaA03g41470D,BnaC09g40220D,BnaC03g…
GO:0004012	phospholipid-translocating ATPase activity	molecular_function	38	39262	0.000984723	0.00213855	1.25015	BnaC01g28380D,BnaA06g07520D,BnaC03g48240D,BnaA09g46440D,BnaC08g40500D,BnaC04g18740D,BnaC07g17730D,BnaA06g31810D,BnaA02g27550D,BnaA09g48190D,BnaCnng48470D,BnaC06g30340D,BnaA06g36230D,BnaA03g01540D,BnaA02g16070D,BnaC06g33850D,BnaC07g24800D,BnaC06g25680D,BnaA07g37090D,BnaC08g37730D,BnaA06g33510D,BnaAnng32350D,BnaC07g11980D,BnaCnng76100D,BnaA07g30400D,BnaC03g01830D,BnaA07g27360D,BnaC06g10670D,BnaC05g…
GO:0004527	exonuclease activity	molecular_function	38	39262	0.315756	0.405233	1.02953	BnaC07g16090D,BnaA02g17350D,BnaC07g28400D,BnaC06g36330D,BnaA10g24000D,BnaA09g15880D,BnaC09g00260D,BnaA06g37110D,BnaA06g27880D,BnaC07g29070D,BnaCnng37390D,BnaA01g34700D,BnaC09g48620D,BnaC05g38480D,BnaC02g23590D,BnaC04g51770D,BnaC09g30690D,BnaA05g24450D,BnaAnng09050D,BnaC07g46920D,BnaA08g16210D,BnaAnng03800D,BnaC06g35310D,BnaA07g31520D,BnaC01g00700D,BnaC03g71760D,BnaA07g11990D,BnaC03g60660D,BnaA06g…
GO:0015079	potassium ion transmembrane transporter activity	molecular_function	37	39262	0.078161	0.120428	1.1114	BnaA08g08020D,BnaUnng04310D,BnaC06g15440D,BnaC04g14750D,BnaA05g12300D,BnaA04g23330D,BnaC01g41320D,BnaC03g76940D,BnaC04g01430D,BnaA03g44320D,BnaA07g16500D,BnaA01g13320D,BnaC06g31400D,BnaC03g16580D,BnaC01g04660D,BnaC02g19780D,BnaCnng46720D,BnaA01g10310D,BnaCnng05490D,BnaC01g15360D,BnaC07g36130D,BnaA01g03380D,BnaC04g47240D,BnaC07g36080D,BnaC01g43090D,BnaA01g22220D,BnaA07g38760D,BnaA03g13690D,BnaC02g…
GO:0004497	monooxygenase activity	molecular_function	37	39262	0.818547	0.901334	0.912937	BnaA02g23180D,BnaA01g01320D,BnaAnng01230D,BnaC08g07160D,BnaA04g11490D,BnaA06g07270D,BnaC04g34320D,BnaC07g07550D,BnaC07g51130D,BnaC07g24420D,BnaC05g39080D,BnaCnng41000D,BnaAnng21530D,BnaA08g31650D,BnaC02g29610D,BnaC06g34300D,BnaA09g16780D,BnaA05g00950D,BnaCnng18080D,BnaA07g30800D,BnaA04g20210D,BnaA01g18640D,BnaC08g34800D,BnaC02g38080D,BnaA08g16480D,BnaC07g10050D,BnaAnng19730D,BnaC03g41400D,BnaA08g…
GO:0046914	transition metal ion binding	molecular_function	36	39262	0.00163626	0.00346651	1.24357	BnaA01g32860D,BnaC03g24420D,BnaA09g35560D,BnaA07g17040D,BnaA05g27910D,BnaC04g03030D,BnaC06g15730D,BnaC07g48980D,BnaC05g48250D,BnaC09g41590D,BnaC02g36630D,BnaA05g33500D,BnaA06g32440D,BnaA03g28050D,BnaCnng20460D,BnaA10g18080D,BnaA03g20420D,BnaC03g01650D,BnaC05g42110D,BnaC08g27800D,BnaC04g48390D,BnaA07g16710D,BnaA03g01310D,BnaC03g00160D,BnaA07g06360D,BnaA08g28530D,BnaA10g18090D,BnaA09g35550D,BnaA02g…
GO:0015171	amino acid transmembrane transporter activity	molecular_function	36	39262	0.0527322	0.0854948	1.13052	BnaA03g42910D,BnaA06g34530D,BnaA01g26050D,BnaC05g39680D,BnaA09g12110D,BnaC02g33700D,BnaA09g45150D,BnaA10g24900D,BnaCnng65210D,BnaA03g42920D,BnaCnng50730D,BnaA05g25770D,BnaA09g53040D,BnaA06g35110D,BnaC09g49830D,BnaA05g32770D,BnaA03g58530D,BnaCnng25140D,BnaC03g01740D,BnaAnng23630D,BnaC07g34120D,BnaA09g24850D,BnaA04g20450D,BnaC08g37970D,BnaC09g12080D,BnaA02g27130D,BnaAnng19530D,BnaC05g48070D,BnaC01g…
GO:0005385	zinc ion transmembrane transporter activity	molecular_function	35	39262	0.00210399	0.00440631	1.24003	BnaC01g12040D,BnaC05g40440D,BnaA04g18660D,BnaC07g36030D,BnaA05g10760D,BnaC01g05220D,BnaCnng46020D,BnaC04g12510D,BnaA09g13960D,BnaA05g26420D,BnaA08g07950D,BnaA03g44150D,BnaC05g49110D,BnaA09g47880D,BnaCnng21180D,BnaA08g08320D,BnaC07g36010D,BnaA05g12290D,BnaA03g44160D,BnaC01g28910D,BnaA01g35020D,BnaCnng67060D,BnaA09g25300D,BnaA01g23170D,BnaA10g03460D,BnaCnng65140D,BnaC08g09190D,BnaC04g14740D,BnaC07g…
GO:0004869	cysteine-type endopeptidase inhibitor activity	molecular_function	35	39262	0.811549	0.894226	0.912472	BnaC03g17860D,BnaC03g01960D,BnaA03g36740D,BnaA01g05780D,BnaA05g26650D,BnaA02g01140D,BnaC09g44540D,BnaA07g37080D,BnaC02g04270D,BnaA03g19270D,BnaA10g03130D,BnaA06g35460D,BnaA09g18350D,BnaA05g26660D,BnaA01g17290D,BnaC04g47470D,BnaA03g36720D,BnaC09g22220D,BnaC05g40690D,BnaCnng62150D,BnaA10g29010D,BnaA09g19480D,BnaC01g38380D,BnaAnng38350D,BnaC09g20280D,BnaC07g11630D,BnaC07g33590D,BnaA03g55150D,BnaAnng…
GO:0019205	nucleobase-containing compound kinase activity	molecular_function	34	39262	0.000712476	0.00157223	1.26971	BnaA05g06070D,BnaA05g12040D,BnaA06g22680D,BnaC04g06280D,BnaC03g50940D,BnaA09g38260D,BnaA06g30580D,BnaA03g17110D,BnaC03g32260D,BnaC07g48060D,BnaC08g47170D,BnaAnng32580D,BnaA04g29220D,BnaA03g23470D,BnaA08g07200D,BnaA05g12090D,BnaA04g21280D,BnaA03g27260D,BnaC02g48410D,BnaA09g04210D,BnaC08g47180D,BnaA02g31630D,BnaC07g26210D,BnaC03g27800D,BnaA09g02790D,BnaCnng15820D,BnaA01g14660D,BnaC01g17230D,BnaC07g…
GO:0003697	single-stranded DNA binding	molecular_function	34	39262	0.0191773	0.0342317	1.17448	BnaAnng27110D,BnaA05g13130D,BnaC04g12130D,BnaAnng33860D,BnaC06g20150D,BnaC03g18260D,BnaA09g22130D,BnaC07g36180D,BnaC08g36690D,BnaC04g43270D,BnaC06g43010D,BnaC07g43850D,BnaA03g44350D,BnaC03g35730D,BnaC07g01720D,BnaC01g34060D,BnaCnng54460D,BnaCnng36790D,BnaAnng05290D,BnaC07g24890D,BnaA05g21580D,BnaA01g26670D,BnaA06g31700D,BnaC03g00130D,BnaCnng11030D,BnaA09g44130D,BnaA03g30390D,BnaA07g35950D,BnaC02g…
GO:0004402	histone acetyltransferase activity	molecular_function	34	39262	0.0734898	0.114955	1.11855	BnaA02g33650D,BnaC03g13320D,BnaC03g51080D,BnaAnng24420D,BnaA06g11230D,BnaC08g01420D,BnaA08g28380D,BnaA06g25030D,BnaA03g54130D,BnaA10g03480D,BnaA06g22570D,BnaA03g10630D,BnaA06g16600D,BnaA08g23530D,BnaA01g00360D,BnaA03g32560D,BnaC08g38240D,BnaC03g48540D,BnaC05g12770D,BnaC06g39410D,BnaC07g46630D,BnaC09g33270D,BnaC02g42410D,BnaA09g56200D,BnaCnng09450D,BnaA07g34570D,BnaC08g17010D,BnaA01g30150D,BnaC03g…
GO:0015116	sulfate transmembrane transporter activity	molecular_function	34	39262	0.835023	0.917632	0.903447	BnaC09g00110D,BnaC01g35550D,BnaC05g37350D,BnaC01g44250D,BnaA07g35730D,BnaA05g23640D,BnaC09g43540D,BnaC07g13290D,BnaC02g08870D,BnaC02g14670D,BnaC06g38470D,BnaA09g32410D,BnaC05g18450D,BnaA03g04410D,BnaA02g18690D,BnaC07g32580D,BnaA07g10140D,BnaA07g33850D,BnaC06g40650D,BnaA10g19810D,BnaC02g24710D,BnaA02g00410D,BnaA09g30120D,BnaC03g09670D,BnaC06g38480D,BnaC03g39450D,BnaC03g05940D,BnaA02g04350D,BnaA01g…
GO:0005388	calcium-transporting ATPase activity	molecular_function	33	39262	0.0478379	0.0780989	1.13994	BnaC03g41960D,BnaA10g11120D,BnaA03g49860D,BnaA01g24360D,BnaC08g28250D,BnaC04g20690D,BnaA03g54160D,BnaC03g58140D,BnaC03g61330D,BnaC07g42210D,BnaA09g36660D,BnaA01g25310D,BnaC08g42380D,BnaA03g36090D,BnaC07g46660D,BnaC03g15290D,BnaC01g31340D,BnaA01g07100D,BnaC02g11860D,BnaC04g47760D,BnaCnng07470D,BnaA07g17260D,BnaC01g17980D,BnaC01g32200D,BnaA02g08330D,BnaC05g07470D,BnaA08g15730D,BnaA04g24000D,BnaC09g…
GO:0005089	Rho guanyl-nucleotide exchange factor activity	molecular_function	33	39262	0.804166	0.887282	0.91195	BnaC08g26610D,BnaCnng02310D,BnaC06g41060D,BnaA10g15580D,BnaA09g25030D,BnaA07g05950D,BnaC04g12050D,BnaAnng34400D,BnaC02g08830D,BnaA03g07650D,BnaA09g51920D,BnaC09g26350D,BnaA09g35280D,BnaA05g15000D,BnaA10g27430D,BnaC09g38110D,BnaC03g09660D,BnaC06g18960D,BnaCnng03770D,BnaA02g04310D,BnaA07g19700D,BnaC07g07300D,BnaC04g04580D,BnaC08g09010D,BnaC09g49470D,BnaC06g09410D,BnaA10g24580D,BnaA09g54200D,BnaA05g…
GO:0016307	phosphatidylinositol phosphate kinase activity	molecular_function	33	39262	0.804166	0.887282	0.91195	BnaA08g21050D,BnaC08g20070D,BnaC02g20500D,BnaC03g35590D,BnaA02g15290D,BnaC01g39540D,BnaCnng01950D,BnaC08g42290D,BnaA09g40500D,BnaA10g04100D,BnaA07g29040D,BnaC01g37100D,BnaCnng58420D,BnaC09g14450D,BnaC06g32150D,BnaA03g33330D,BnaC01g04950D,BnaA09g23120D,BnaC05g08390D,BnaC05g43070D,BnaA03g30270D,BnaA09g00140D,BnaA01g03610D,BnaA06g06710D,BnaA02g36050D,BnaC02g24660D,BnaC01g05410D,BnaA09g47830D,BnaA05g…
GO:0001104	RNA polymerase II transcription cofactor activity	molecular_function	32	39262	0.00122604	0.00262107	1.26331	BnaA10g15290D,BnaC05g47070D,BnaA03g07970D,BnaAnng18420D,BnaCnng05620D,BnaC05g12530D,BnaA07g13720D,BnaC03g32110D,BnaA07g09420D,BnaA10g26710D,BnaCnng02320D,BnaC09g37710D,BnaA06g00390D,BnaC05g20130D,BnaC05g51820D,BnaA05g36640D,BnaC02g03270D,BnaC07g12340D,BnaC03g10030D,BnaA09g51930D,BnaC06g07220D,BnaA03g27110D,BnaA05g13810D,BnaC05g48810D,BnaA02g04580D,BnaA05g33870D,BnaAnng10600D,BnaC06g10880D,BnaC04g…
GO:0003872	6-phosphofructokinase activity	molecular_function	32	39262	0.0044246	0.0087957	1.22822	BnaA08g21540D,BnaA07g32860D,BnaC01g05570D,BnaA03g40360D,BnaA01g07610D,BnaAnng29210D,BnaC01g35030D,BnaA03g10690D,BnaA06g35220D,BnaC02g36920D,BnaC05g50320D,BnaC07g31330D,BnaA01g04110D,BnaC08g41630D,BnaC09g33200D,BnaA06g38560D,BnaC01g09280D,BnaA09g42580D,BnaA01g15420D,BnaA06g08370D,BnaC02g12110D,BnaC03g13370D,BnaC09g22950D,BnaC07g20530D,BnaA10g10800D,BnaC05g09740D,BnaC06g37390D,BnaC07g09630D,BnaC01g…
GO:0008061	chitin binding	molecular_function	32	39262	0.237905	0.321641	1.05276	BnaA09g15440D,BnaC04g48920D,BnaA05g03430D,BnaA04g25220D,BnaC03g24340D,BnaC05g40680D,BnaC03g37570D,BnaA03g20330D,BnaC03g24290D,BnaC08g25210D,BnaA03g56430D,BnaA03g28780D,BnaA04g25230D,BnaC03g37600D,BnaC03g33900D,BnaA03g20340D,BnaC04g49100D,BnaA03g20310D,BnaA03g20290D,BnaC03g24270D,BnaA03g32280D,BnaC03g19370D,BnaA09g15430D,BnaA09g34290D,BnaA05g03420D,BnaA05g26640D,BnaC03g24360D,BnaC03g24330D,BnaA03g…
GO:0008889	glycerophosphodiester phosphodiesterase activity	molecular_function	32	39262	0.974456	1	0.818811	BnaA04g10820D,BnaA02g36750D,BnaA01g15810D,BnaA02g12730D,BnaC06g13430D,BnaCnng75290D,BnaA07g22350D,BnaC09g33580D,BnaAnng41260D,BnaC06g35160D,BnaC02g11010D,BnaC03g41620D,BnaC09g31980D,BnaC07g40640D,BnaC06g23230D,BnaCnng05510D,BnaA07g22360D,BnaC06g23200D,BnaA10g09570D,BnaC09g52640D,BnaA07g29250D,BnaA07g31350D,BnaC04g33210D,BnaC03g21170D,BnaA03g48410D,BnaA03g35790D,BnaC06g32420D,BnaA03g48210D,BnaCnng…
GO:0010333	terpene synthase activity	molecular_function	32	39262	1	1	0.455833	BnaC07g23000D,BnaA08g09430D,BnaA03g40240D,BnaA01g29320D,BnaC03g38570D,BnaCnng60530D,BnaA10g11530D,BnaC06g39870D,BnaC09g18750D,BnaAnng04280D,BnaA03g33440D,BnaC09g30970D,BnaA03g22980D,BnaAnng31910D,BnaA06g33330D,BnaA08g30440D,BnaC03g38580D,BnaC05g39050D,BnaC07g49880D,BnaC09g05320D,BnaC03g27100D,BnaC09g30980D,BnaA06g33340D,BnaA07g34940D,BnaA09g17640D,BnaA03g24650D,BnaC02g31080D,BnaA10g08490D,BnaA03g…
GO:0004143	diacylglycerol kinase activity	molecular_function	31	39262	0.267036	0.356916	1.04473	BnaA06g22880D,BnaC01g08060D,BnaC03g03330D,BnaC04g04760D,BnaC07g30790D,BnaC03g16020D,BnaA05g05360D,BnaC09g51050D,BnaA09g10340D,BnaA04g26670D,BnaC04g50730D,BnaA03g13210D,BnaA03g02290D,BnaA03g44730D,BnaAnng06320D,BnaA01g06700D,BnaA06g26190D,BnaC02g01400D,BnaC07g03080D,BnaC08g36120D,BnaA02g32870D,BnaA09g43530D,BnaA08g09710D,BnaA09g09730D,BnaC03g64130D,BnaC03g50590D,BnaC09g10500D,BnaC07g36750D,BnaA07g…
GO:0004866	endopeptidase inhibitor activity	molecular_function	31	39262	1	1	0.603296	BnaC06g34200D,BnaA07g22750D,BnaA07g30730D,BnaAnng30440D,BnaC06g31860D,BnaC06g23690D,BnaC05g13820D,BnaA02g35870D,BnaC06g33470D,BnaC06g34210D,BnaA07g30740D,BnaC06g34190D,BnaA07g30710D,BnaA09g03380D,BnaC06g34250D,BnaC08g17590D,BnaCnng44800D,BnaA07g30750D,BnaA06g12080D,BnaA07g30720D,BnaC06g34170D,BnaA09g03390D,BnaA08g22890D,BnaC06g34290D,BnaC02g46470D,BnaC06g23700D,BnaAnng20080D,BnaA07g30790D,BnaA02g…
GO:0008312	7S RNA binding	molecular_function	30	39262	4.42e-05	0.000105137	1.33717	BnaA07g24930D,BnaA06g19200D,BnaA05g03460D,BnaC06g28700D,BnaA08g02950D,BnaC03g24370D,BnaC02g02830D,BnaA06g16170D,BnaC04g49120D,BnaCnng77880D,BnaAnng00870D,BnaC05g11610D,BnaA10g26220D,BnaA04g25260D,BnaA07g26580D,BnaA06g03460D,BnaA08g03500D,BnaC06g01660D,BnaAnng26360D,BnaC08g03210D,BnaC08g03850D,BnaCnng10600D,BnaA06g09990D,BnaC06g02320D,BnaC06g26630D,BnaCnng63570D,BnaAnng40040D,BnaA03g20350D,BnaC08g…
GO:0003678	DNA helicase activity	molecular_function	30	39262	0.00209773	0.00440631	1.25613	BnaC03g31160D,BnaC02g32200D,BnaCnng58270D,BnaA03g08480D,BnaA02g24390D,BnaC05g23690D,BnaA09g25870D,BnaC02g09460D,BnaC03g48680D,BnaA10g27860D,BnaC06g00930D,BnaA02g05570D,BnaAnng10190D,BnaC05g38040D,BnaC03g46410D,BnaCnng57480D,BnaC03g10810D,BnaA03g26370D,BnaCnng01120D,BnaC08g46630D,BnaCnng62610D,BnaA08g04370D,BnaA09g00540D,BnaC09g07130D,BnaA06g24900D,BnaA06g36070D,BnaA10g14040D,BnaA03g38130D,BnaA03g…
GO:0008173	RNA methyltransferase activity	molecular_function	29	39262	0.000567546	0.00125917	1.2926	BnaA05g36690D,BnaC09g14790D,BnaA03g35360D,BnaA01g10820D,BnaA07g13920D,BnaC07g33050D,BnaC01g01030D,BnaC03g38170D,BnaA01g08500D,BnaC09g42480D,BnaA01g00120D,BnaC04g15760D,BnaA01g18460D,BnaA03g41950D,BnaA01g10830D,BnaCnng27790D,BnaC03g41050D,BnaC04g05780D,BnaA03g33080D,BnaC01g12400D,BnaC07g01190D,BnaA07g00910D,BnaA05g05920D,BnaA01g10810D,BnaA09g14260D,BnaA10g18760D,BnaC01g12390D,BnaCnng31380D,BnaC01g…
GO:0016161	beta-amylase activity	molecular_function	29	39262	0.00913517	0.0175652	1.21426	BnaA08g00480D,BnaC03g14120D,BnaA03g07240D,BnaA01g17940D,BnaC03g43570D,BnaC03g78310D,BnaC09g21440D,BnaC09g39140D,BnaCnng71190D,BnaA03g11260D,BnaA03g37260D,BnaC03g71580D,BnaC07g34180D,BnaC02g12830D,BnaCnng71250D,BnaA02g08900D,BnaC03g78320D,BnaC01g21190D,BnaC04g04570D,BnaA07g05790D,BnaA08g05660D,BnaA02g36650D,BnaA05g05170D,BnaCnng02280D,BnaC03g09200D,BnaA10g16290D,BnaC02g31510D,BnaA09g51890D,BnaA03g…
GO:0004435	phosphatidylinositol phospholipase C activity	molecular_function	29	39262	0.0953373	0.144723	1.11307	BnaAnng36640D,BnaCnng67650D,BnaC03g12400D,BnaC09g33980D,BnaA09g35480D,BnaA04g06750D,BnaA05g07540D,BnaA05g29670D,BnaA04g02700D,BnaC09g34000D,BnaC05g44000D,BnaA06g40820D,BnaAnng32110D,BnaUnng04440D,BnaC08g26860D,BnaAnng17370D,BnaC02g10620D,BnaC09g34010D,BnaA10g29500D,BnaA02g07560D,BnaA06g40830D,BnaA02g07530D,BnaCnng14930D,BnaC04g56690D,BnaA04g22580D,BnaA06g17100D,BnaA10g29510D,BnaC01g39480D,BnaA10g…
GO:0008271	secondary active sulfate transmembrane transporter activity	molecular_function	29	39262	0.788102	0.875433	0.910694	BnaC01g35550D,BnaC05g37350D,BnaA05g23640D,BnaC09g43540D,BnaC07g13290D,BnaC02g08870D,BnaC02g14670D,BnaC06g38470D,BnaA09g32410D,BnaC05g18450D,BnaA03g04410D,BnaA02g18690D,BnaC07g32580D,BnaA07g10140D,BnaA07g33850D,BnaA10g19810D,BnaC02g24710D,BnaA02g00410D,BnaA09g30120D,BnaC03g09670D,BnaC06g38480D,BnaC03g39450D,BnaC03g05940D,BnaA02g04350D,BnaA01g28310D,BnaA09g01000D,BnaC02g00440D,BnaA07g33860D,BnaA03g…
GO:0005545	1-phosphatidylinositol binding	molecular_function	29	39262	0.951197	1	0.834803	BnaC08g00120D,BnaC07g10870D,BnaC01g06220D,BnaA02g08290D,BnaA10g11240D,BnaC05g03060D,BnaC02g34010D,BnaA02g25770D,BnaA09g23660D,BnaC05g11150D,BnaC04g37710D,BnaA06g09690D,BnaC09g53320D,BnaC05g50410D,BnaC05g10880D,BnaC07g20930D,BnaAnng36220D,BnaA09g18730D,BnaA04g14860D,BnaC08g33460D,BnaA01g04700D,BnaA01g15110D,BnaAnng12440D,BnaA06g34790D,BnaC01g17840D,BnaC08g08040D,BnaA09g40960D,BnaA07g37210D,BnaC09g…
GO:0030276	clathrin binding	molecular_function	29	39262	0.951197	1	0.834803	BnaC08g00120D,BnaC07g10870D,BnaC01g06220D,BnaA02g08290D,BnaA10g11240D,BnaC05g03060D,BnaC02g34010D,BnaA02g25770D,BnaA09g23660D,BnaC05g11150D,BnaC04g37710D,BnaA06g09690D,BnaC09g53320D,BnaC05g50410D,BnaC05g10880D,BnaC07g20930D,BnaAnng36220D,BnaA09g18730D,BnaA04g14860D,BnaC08g33460D,BnaA01g04700D,BnaA01g15110D,BnaAnng12440D,BnaA06g34790D,BnaC01g17840D,BnaC08g08040D,BnaA09g40960D,BnaA07g37210D,BnaC09g…
GO:0019201	nucleotide kinase activity	molecular_function	28	39262	0	0	1.38174	BnaA05g06070D,BnaA06g22680D,BnaC04g06280D,BnaC03g50940D,BnaA09g38260D,BnaA06g30580D,BnaA03g17110D,BnaC07g48060D,BnaC08g47170D,BnaAnng32580D,BnaA04g29220D,BnaA03g23470D,BnaA08g07200D,BnaA04g21280D,BnaC02g48410D,BnaA09g04210D,BnaA02g31630D,BnaC07g26210D,BnaC03g27800D,BnaA09g02790D,BnaCnng15820D,BnaA01g14660D,BnaC01g17230D,BnaC07g28830D,BnaC09g03640D,BnaA06g39400D,BnaC03g20630D,BnaA09g06550D
GO:0016615	malate dehydrogenase activity	molecular_function	28	39262	0.000761018	0.00167261	1.28963	BnaC03g12430D,BnaA02g00100D,BnaA04g13230D,BnaC09g33800D,BnaA03g09800D,BnaCnng15110D,BnaC02g00740D,BnaA10g02560D,BnaA10g10850D,BnaC03g78200D,BnaC04g35330D,BnaCnng29330D,BnaA05g14590D,BnaA06g01050D,BnaA09g16400D,BnaC05g02530D,BnaA02g07730D,BnaCnng55040D,BnaA08g27880D,BnaA06g08600D,BnaC06g06220D,BnaC02g10780D,BnaC09g17480D,BnaA10g11990D,BnaA10g22420D,BnaC09g33250D,BnaA06g38600D,BnaA08g01250D
GO:0016831	carboxy-lyase activity	molecular_function	28	39262	0.748218	0.837352	0.921162	BnaA07g25530D,BnaC01g09790D,BnaAnng06510D,BnaC03g58220D,BnaA06g19240D,BnaA08g04700D,BnaC06g27330D,BnaA02g26140D,BnaC07g00580D,BnaA09g15450D,BnaC05g51500D,BnaC03g54190D,BnaA07g00240D,BnaC04g12030D,BnaC02g34260D,BnaC09g40620D,BnaC08g05570D,BnaA03g06510D,BnaA08g18660D,BnaAnng27540D,BnaA07g00220D,BnaC04g12040D,BnaC03g08350D,BnaC09g51700D,BnaA09g18890D,BnaA03g06520D,BnaC09g52280D,BnaCnng71810D
GO:0008121	ubiquinol-cytochrome-c reductase activity	molecular_function	27	39262	0	0	1.38174	BnaC03g05860D,BnaC08g39030D,BnaA08g31320D,BnaA02g01630D,BnaC09g00580D,BnaA10g19910D,BnaC03g05870D,BnaA03g04320D,BnaA02g27180D,BnaC09g43660D,BnaC02g33570D,BnaA08g02760D,BnaC09g43630D,BnaC09g49950D,BnaAnng23750D,BnaC05g11420D,BnaA03g04330D,BnaC02g04740D,BnaA03g25710D,BnaC03g30230D,BnaA02g01620D,BnaA03g55270D,BnaA10g25030D,BnaA06g38290D,BnaC08g16500D,BnaA09g01470D,BnaC02g04750D
GO:0030234	enzyme regulator activity	molecular_function	27	39262	0.00101948	0.00220239	1.28645	BnaA01g08440D,BnaA03g26470D,BnaA07g32250D,BnaA07g00430D,BnaA06g17980D,BnaA08g13700D,BnaCnng26770D,BnaC04g12080D,BnaCnng48550D,BnaA02g18360D,BnaC07g00290D,BnaC08g13070D,BnaC06g36630D,BnaA07g11600D,BnaCnng77420D,BnaCnng07150D,BnaC07g41330D,BnaC08g23210D,BnaC01g09980D,BnaA03g15060D,BnaC04g43310D,BnaC03g18080D,BnaAnng17060D,BnaA03g49280D,BnaA04g19020D,BnaA08g21890D,BnaC03g31330D
GO:0002161	aminoacyl-tRNA editing activity	molecular_function	27	39262	0.0360607	0.0608663	1.16585	BnaAnng27600D,BnaA03g25380D,BnaA09g56940D,BnaUnng00270D,BnaA10g17760D,BnaC03g75900D,BnaCnng19820D,BnaA09g48390D,BnaA03g45240D,BnaC03g29830D,BnaC09g41130D,BnaC08g39450D,BnaC08g42640D,BnaA10g27840D,BnaC06g41300D,BnaC08g48000D,BnaC06g00890D,BnaC02g38910D,BnaC05g10820D,BnaC07g27010D,BnaA02g30540D,BnaA06g09440D,BnaA06g29730D,BnaC08g46640D,BnaA08g04380D,BnaA04g11450D,BnaC07g37200D
GO:0004089	carbonate dehydratase activity	molecular_function	27	39262	0.92541	0.987113	0.847888	BnaC03g49820D,BnaC01g27750D,BnaC03g66520D,BnaC08g23920D,BnaA09g13030D,BnaCnng45250D,BnaC07g13050D,BnaA03g14190D,BnaC04g16040D,BnaCnng63520D,BnaA06g04110D,BnaC03g17150D,BnaCnng31770D,BnaA09g33130D,BnaCnng45230D,BnaA07g38790D,BnaA01g21620D,BnaA09g29930D,BnaA03g52570D,BnaA08g11540D,BnaC01g04640D,BnaC07g44310D,BnaA02g14850D,BnaAnng15140D,BnaA01g03360D,BnaC09g12980D,BnaA07g13710D
GO:0016866	intramolecular transferase activity	molecular_function	27	39262	0.968586	1	0.811023	BnaAnng16810D,BnaA02g02720D,BnaC08g49140D,BnaC06g39380D,BnaC02g06160D,BnaA05g06100D,BnaA03g38150D,BnaC04g06310D,BnaC09g42220D,BnaA03g27800D,BnaC03g07130D,BnaC09g41420D,BnaC03g36310D,BnaA09g42350D,BnaA07g06500D,BnaA01g33130D,BnaA10g17950D,BnaA06g11130D,BnaC03g32850D,BnaA07g34540D,BnaCnng76020D,BnaC05g48410D,BnaC06g20260D,BnaC07g08020D,BnaA10g18590D,BnaC03g74380D,BnaA03g05580D
GO:0042803	protein homodimerization activity	molecular_function	26	39262	0.000161209	0.00037223	1.33057	BnaC03g39830D,BnaA03g48280D,BnaCnng19880D,BnaA08g14300D,BnaC06g11890D,BnaA10g09440D,BnaA05g22950D,BnaC08g42660D,BnaA01g15900D,BnaA09g48410D,BnaA10g17040D,BnaA04g20180D,BnaC08g47050D,BnaC01g40810D,BnaA08g29730D,BnaC06g42250D,BnaC05g36390D,BnaA05g12750D,BnaC02g07400D,BnaC09g31720D,BnaC04g32730D,BnaC09g40220D,BnaAnng15980D,BnaC08g12310D,BnaC07g40540D,BnaA07g15060D
GO:0030983	mismatched DNA binding	molecular_function	26	39262	0.0442417	0.0730255	1.15888	BnaCnng46130D,BnaC06g05430D,BnaC03g31100D,BnaA05g20450D,BnaC02g16350D,BnaC07g39740D,BnaA08g08260D,BnaC01g30070D,BnaA02g11900D,BnaA03g26360D,BnaC03g28480D,BnaC07g08470D,BnaC02g13830D,BnaA02g09880D,BnaC02g27290D,BnaC06g05440D,BnaA01g22970D,BnaCnng35120D,BnaC07g45660D,BnaA02g20560D,BnaA07g05700D,BnaCnng68560D,BnaCnng23780D,BnaA03g23940D,BnaA03g53380D,BnaA03g34810D
GO:0005249	voltage-gated potassium channel activity	molecular_function	26	39262	0.808687	0.891671	0.898133	BnaA04g14030D,BnaA03g50250D,BnaA03g28160D,BnaC04g16000D,BnaC08g33320D,BnaC04g36270D,BnaA09g17910D,BnaC07g43880D,BnaC04g37620D,BnaA09g41300D,BnaCnng47090D,BnaC07g42730D,BnaA04g14530D,BnaA06g36090D,BnaCnng40090D,BnaC04g36890D,BnaA01g04350D,BnaA07g13760D,BnaC08g33890D,BnaA04g14740D,BnaC07g04630D,BnaA09g41750D,BnaC03g33190D,BnaC01g05810D,BnaA07g03930D,BnaA03g52140D
GO:0042393	histone binding	molecular_function	26	39262	0.998295	1	0.718506	BnaC03g06140D,BnaC03g01840D,BnaC04g43670D,BnaC06g43880D,BnaA09g42540D,BnaA07g24970D,BnaC09g50300D,BnaC06g43300D,BnaA02g25050D,BnaC06g26680D,BnaA03g04610D,BnaC02g33250D,BnaC02g02520D,BnaA07g22850D,BnaA04g13190D,BnaC09g50310D,BnaC08g24970D,BnaC04g10170D,BnaA09g34050D,BnaA04g19330D,BnaA07g30600D,BnaA10g25310D,BnaA03g01550D,BnaC08g35000D,BnaC04g35290D,BnaA05g08770D
GO:0004124	cysteine synthase activity	molecular_function	24	39262	0.000307893	0.000695297	1.32647	BnaAnng27260D,BnaC05g46930D,BnaC09g02930D,BnaC04g21780D,BnaA05g03520D,BnaAnng11450D,BnaA01g34070D,BnaC04g22760D,BnaC09g02940D,BnaC05g46910D,BnaA03g28870D,BnaC04g49280D,BnaC08g09930D,BnaC01g22710D,BnaA04g00700D,BnaC02g39510D,BnaC01g40620D,BnaC04g03050D,BnaA04g25390D,BnaA09g03560D,BnaA04g01540D,BnaAnng10750D,BnaCnng62620D,BnaC08g31370D
GO:0008242	omega peptidase activity	molecular_function	24	39262	0.000307893	0.000695297	1.32647	BnaCnng51760D,BnaA08g18590D,BnaC05g32240D,BnaC06g39060D,BnaC04g40660D,BnaC03g41700D,BnaC03g58290D,BnaC04g26510D,BnaA03g05930D,BnaA07g25370D,BnaA03g35860D,BnaC04g15040D,BnaA05g20290D,BnaA07g34300D,BnaA05g12400D,BnaC03g07690D,BnaA04g04320D,BnaC06g39080D,BnaA02g19000D,BnaC08g24980D,BnaA09g34060D,BnaA07g34310D,BnaC02g25180D,BnaC06g27150D
GO:0008276	protein methyltransferase activity	molecular_function	24	39262	0.000307893	0.000695297	1.32647	BnaC01g32820D,BnaCnng01050D,BnaA06g23300D,BnaC02g15920D,BnaC02g13910D,BnaA01g35410D,BnaAnng36410D,BnaA02g11410D,BnaA02g10000D,BnaC07g01550D,BnaC05g39940D,BnaC05g32500D,BnaC01g09010D,BnaC03g50020D,BnaC03g41340D,BnaC01g19790D,BnaA01g07340D,BnaA05g19120D,BnaC03g16070D,BnaC07g41980D,BnaC01g37640D,BnaA03g13260D,BnaA03g49570D,BnaA03g35560D
GO:0003950	NAD+ ADP-ribosyltransferase activity	molecular_function	24	39262	0.0658802	0.104544	1.14351	BnaAnng34290D,BnaA02g33450D,BnaC04g13660D,BnaA08g06940D,BnaC05g50870D,BnaC03g30970D,BnaA02g36520D,BnaC03g74760D,BnaA03g26210D,BnaCnng53220D,BnaC05g28860D,BnaC04g09610D,BnaC05g24350D,BnaA09g30950D,BnaC04g44420D,BnaA05g11420D,BnaC02g27380D,BnaA07g09920D,BnaC08g21790D,BnaA06g22030D,BnaA05g08530D,BnaCnng35940D,BnaC07g48280D,BnaC03g16480D
GO:0017089	glycolipid transporter activity	molecular_function	24	39262	0.0658802	0.104544	1.14351	BnaC02g32320D,BnaC07g14510D,BnaA05g19740D,BnaA06g15100D,BnaA05g10120D,BnaC06g30250D,BnaA04g19520D,BnaCnng62630D,BnaCnng41400D,BnaA07g27260D,BnaCnng54400D,BnaC02g32330D,BnaA07g37290D,BnaC06g04810D,BnaA01g25230D,BnaC04g43910D,BnaA03g15950D,BnaC04g10510D,BnaA08g16360D,BnaC03g19080D,BnaA02g24550D,BnaC05g16620D,BnaAnng34100D,BnaA07g27250D
GO:0051861	glycolipid binding	molecular_function	24	39262	0.0658802	0.104544	1.14351	BnaC02g32320D,BnaC07g14510D,BnaA05g19740D,BnaA06g15100D,BnaA05g10120D,BnaC06g30250D,BnaA04g19520D,BnaCnng62630D,BnaCnng41400D,BnaA07g27260D,BnaCnng54400D,BnaC02g32330D,BnaA07g37290D,BnaC06g04810D,BnaA01g25230D,BnaC04g43910D,BnaA03g15950D,BnaC04g10510D,BnaA08g16360D,BnaC03g19080D,BnaA02g24550D,BnaC05g16620D,BnaAnng34100D,BnaA07g27250D
GO:0004721	phosphoprotein phosphatase activity	molecular_function	24	39262	0.632659	0.733492	0.947481	BnaC03g30360D,BnaA10g29380D,BnaA09g48900D,BnaC02g46770D,BnaA01g17890D,BnaC01g21150D,BnaC08g43180D,BnaA08g26980D,BnaA05g10040D,BnaA02g20870D,BnaC04g48530D,BnaA07g22500D,BnaC04g52600D,BnaC04g54120D,BnaC09g33530D,BnaA03g25860D,BnaAnng14650D,BnaC06g23390D,BnaC08g13460D,BnaA03g09970D,BnaC03g12630D,BnaA05g03020D,BnaCnng32470D,BnaA04g24680D
GO:0004176	ATP-dependent peptidase activity	molecular_function	24	39262	0.938654	0.996865	0.829046	BnaA09g40760D,BnaA06g28390D,BnaCnng58730D,BnaC08g33270D,BnaA03g22860D,BnaC08g37110D,BnaC02g24440D,BnaC06g08620D,BnaC07g19860D,BnaC05g14340D,BnaA06g35630D,BnaA02g31450D,BnaA09g56110D,BnaA06g13910D,BnaC05g12420D,BnaAnng02080D,BnaC07g28450D,BnaC03g26910D,BnaC02g48360D,BnaA06g28380D,BnaA06g12830D,BnaC05g15330D,BnaC07g28460D,BnaA02g17230D
GO:0016298	lipase activity	molecular_function	24	39262	1	1	0.502452	BnaC06g06720D,BnaA07g32220D,BnaA02g09320D,BnaA09g27190D,BnaAnng34060D,BnaC06g22050D,BnaA06g14250D,BnaC06g06700D,BnaC03g38380D,BnaA05g25220D,BnaA03g11610D,BnaC05g21950D,BnaC06g36580D,BnaA06g00620D,BnaA07g21530D,BnaC06g22060D,BnaC03g71610D,BnaC05g39430D,BnaA07g32210D,BnaC02g13410D,BnaA03g11620D,BnaC04g55740D,BnaC06g36590D,BnaC03g71620D
GO:0000062	fatty-acyl-CoA binding	molecular_function	23	39262	0.000425501	0.000953029	1.32417	BnaC02g39790D,BnaC02g44810D,BnaAnng25690D,BnaCnng15340D,BnaC07g38820D,BnaA05g36060D,BnaA02g10270D,BnaC03g34240D,BnaAnng02620D,BnaC01g20440D,BnaA03g46540D,BnaA01g16660D,BnaA08g07670D,BnaA03g29000D,BnaAnng02420D,BnaC05g46370D,BnaA03g48810D,BnaC07g40970D,BnaA09g24910D,BnaA02g31230D,BnaA01g13710D,BnaC01g16110D,BnaA05g31780D
GO:0003978	UDP-glucose 4-epimerase activity	molecular_function	23	39262	0.0129996	0.0240128	1.22231	BnaA01g10650D,BnaC07g18040D,BnaC07g18010D,BnaC09g26030D,BnaC09g12180D,BnaA05g09030D,BnaC01g15760D,BnaA09g25900D,BnaAnng39400D,BnaC05g23640D,BnaC09g18390D,BnaA09g17150D,BnaA09g22180D,BnaA06g38100D,BnaC01g12180D,BnaA08g24600D,BnaCnng22570D,BnaAnng10090D,BnaA09g12250D,BnaA01g13540D,BnaC07g38610D,BnaC08g15730D,BnaC05g49280D
GO:0004784	superoxide dismutase activity	molecular_function	23	39262	0.0129996	0.0240128	1.22231	BnaA05g28020D,BnaC09g04910D,BnaC04g39580D,BnaC07g39340D,BnaA06g05150D,BnaA04g16310D,BnaA06g26040D,BnaA05g28000D,BnaA03g47140D,BnaA01g31350D,BnaC05g06430D,BnaA01g14450D,BnaC01g17020D,BnaCnng69530D,BnaC02g42190D,BnaC03g16120D,BnaC05g42240D,BnaC08g42970D,BnaA03g13310D,BnaA09g05370D,BnaA09g48720D,BnaC09g39740D,BnaA10g16720D
GO:0004861	cyclin-dependent protein serine/threonine kinase inhibitor activity	molecular_function	23	39262	0.0129996	0.0240128	1.22231	BnaA03g15040D,BnaCnng42870D,BnaC03g18060D,BnaAnng16120D,BnaA05g21020D,BnaA03g37600D,BnaA04g19000D,BnaA03g40890D,BnaC04g12110D,BnaC03g40820D,BnaC09g02570D,BnaA09g41990D,BnaC06g02810D,BnaC04g43290D,BnaA06g29930D,BnaC05g33790D,BnaC08g22010D,BnaA03g35120D,BnaC07g31840D,BnaC03g73980D,BnaA06g37540D,BnaA09g03160D,BnaC07g26770D
GO:0004747	ribokinase activity	molecular_function	23	39262	0.237411	0.321238	1.05934	BnaA07g25850D,BnaC04g42400D,BnaA05g16180D,BnaC09g52860D,BnaAnng30390D,BnaA10g07720D,BnaA06g36460D,BnaA04g01640D,BnaA04g18320D,BnaC05g26130D,BnaA03g14420D,BnaC03g17470D,BnaC06g43510D,BnaC05g13340D,BnaA07g18380D,BnaC06g17380D,BnaC05g04100D,BnaA10g03980D,BnaC07g50370D,BnaCnng30740D,BnaC07g17460D,BnaA05g11350D,BnaC04g23060D
GO:0030060	L-malate dehydrogenase activity	molecular_function	23	39262	0.237411	0.321238	1.05934	BnaA02g00100D,BnaA04g13230D,BnaCnng15110D,BnaC02g00740D,BnaA10g02560D,BnaA10g10850D,BnaC03g78200D,BnaC04g35330D,BnaCnng29330D,BnaA05g14590D,BnaA06g01050D,BnaA09g16400D,BnaC03g65500D,BnaC05g02530D,BnaCnng55040D,BnaA08g27880D,BnaC06g06220D,BnaC07g14970D,BnaC09g17480D,BnaA10g22420D,BnaC09g33250D,BnaA06g38600D,BnaA08g01250D
GO:0003918	DNA topoisomerase type II (ATP-hydrolyzing) activity	molecular_function	23	39262	0.458243	0.560163	0.993128	BnaA01g07960D,BnaA05g28510D,BnaA05g20130D,BnaC09g31620D,BnaC03g01590D,BnaCnng10360D,BnaC03g70890D,BnaC05g42830D,BnaA10g26080D,BnaC02g13170D,BnaA03g31350D,BnaC03g36740D,BnaAnng17740D,BnaC05g31500D,BnaA10g26920D,BnaC03g01570D,BnaC01g09540D,BnaA03g55060D,BnaA10g09510D,BnaCnng03220D,BnaA01g07750D,BnaA02g09140D,BnaA03g55070D
GO:0005247	voltage-gated chloride channel activity	molecular_function	22	39262	0	0	1.38174	BnaA06g32380D,BnaA07g15180D,BnaA04g11860D,BnaC06g07440D,BnaA02g28670D,BnaC04g33870D,BnaC02g36720D,BnaC01g03130D,BnaC03g27500D,BnaC02g16210D,BnaC07g49590D,BnaA08g00400D,BnaA06g28170D,BnaA03g23270D,BnaA06g00250D,BnaC06g13300D,BnaA02g11800D,BnaC08g08120D,BnaC07g24030D,BnaA01g01990D,BnaA08g07280D,BnaC03g70680D
GO:0004525	ribonuclease III activity	molecular_function	22	39262	0.000588028	0.00129935	1.32167	BnaA10g00800D,BnaA03g41890D,BnaC05g00860D,BnaC05g47910D,BnaC07g11160D,BnaC03g70170D,BnaC01g01410D,BnaC03g54010D,BnaC05g31650D,BnaA09g28140D,BnaC09g37430D,BnaA08g00670D,BnaA05g32540D,BnaA06g19710D,BnaA01g00420D,BnaC05g21090D,BnaC05g39580D,BnaA10g15080D,BnaC07g32960D,BnaA05g25670D,BnaA05g36100D,BnaA01g18620D
GO:0004003	ATP-dependent DNA helicase activity	molecular_function	22	39262	0.00432615	0.00863131	1.2666	BnaC05g13070D,BnaCnng49030D,BnaC02g47890D,BnaA06g34940D,BnaA07g19750D,BnaA04g11110D,BnaA02g26290D,BnaC06g19000D,BnaA08g27380D,BnaA06g11440D,BnaC07g20790D,BnaC08g00170D,BnaA06g14600D,BnaC07g39350D,BnaCnng72550D,BnaA08g29690D,BnaCnng33790D,BnaA03g47150D,BnaA01g18010D,BnaC08g03910D,BnaCnng34010D,BnaC01g21290D
GO:0008094	DNA-dependent ATPase activity	molecular_function	22	39262	0.0167239	0.0302798	1.21593	BnaAnng27110D,BnaA10g14690D,BnaC06g20150D,BnaA04g16480D,BnaC04g39830D,BnaC08g36690D,BnaC03g35730D,BnaC07g01720D,BnaC03g10310D,BnaCnng55870D,BnaA01g24420D,BnaC09g37020D,BnaC04g04170D,BnaCnng14320D,BnaA05g04710D,BnaA09g44130D,BnaA03g30390D,BnaA07g35950D,BnaC02g25430D,BnaAnng26450D,BnaA03g08120D,BnaA07g20500D
GO:0004356	glutamate-ammonia ligase activity	molecular_function	22	39262	0.0452766	0.0743604	1.16917	BnaA07g15990D,BnaC05g35690D,BnaC04g29670D,BnaC06g14440D,BnaCnng57900D,BnaCnng23850D,BnaC04g30250D,BnaAnng27730D,BnaA10g17910D,BnaA04g08160D,BnaC02g06690D,BnaC03g40250D,BnaA03g34780D,BnaC08g24280D,BnaA02g12430D,BnaA04g07450D,BnaC09g41340D,BnaA02g03140D,BnaA05g22420D,BnaA09g33460D,BnaC08g07930D,BnaA08g29950D
GO:0004372	glycine hydroxymethyltransferase activity	molecular_function	22	39262	0.0452766	0.0743604	1.16917	BnaA08g15890D,BnaAnng08840D,BnaC01g01090D,BnaA08g06130D,BnaA04g06460D,BnaC06g32430D,BnaC08g06530D,BnaA07g23560D,BnaCnng19300D,BnaC03g67280D,BnaA01g04520D,BnaC01g06000D,BnaCnng17010D,BnaC05g17330D,BnaC08g20110D,BnaAnng04180D,BnaA08g21010D,BnaA01g00170D,BnaCnng62500D,BnaA07g29260D,BnaA08g12180D,BnaC03g61150D
GO:0004602	glutathione peroxidase activity	molecular_function	22	39262	0.271796	0.359074	1.04822	BnaCnng27540D,BnaA04g06510D,BnaA01g37280D,BnaA05g11240D,BnaC08g33590D,BnaCnng08430D,BnaCnng04410D,BnaC03g17600D,BnaA09g21570D,BnaA07g19550D,BnaA03g51760D,BnaC07g43540D,BnaC06g18790D,BnaC04g20960D,BnaA02g21680D,BnaC09g11240D,BnaCnng67520D,BnaA09g10960D,BnaA03g14580D,BnaAnng31150D,BnaA03g20200D,BnaC03g24130D
GO:0008408	3'-5' exonuclease activity	molecular_function	22	39262	0.271796	0.359074	1.04822	BnaAnng09470D,BnaCnng48290D,BnaCnng51120D,BnaA04g18800D,BnaA02g37120D,BnaC05g32360D,BnaC05g41420D,BnaC09g51690D,BnaA05g15640D,BnaCnng11710D,BnaCnng71620D,BnaC04g43010D,BnaA04g15250D,BnaC05g26940D,BnaA05g20400D,BnaCnng19290D,BnaC01g42510D,BnaA09g15460D,BnaC06g11900D,BnaA04g06480D,BnaC01g44900D,BnaA05g12760D
GO:0035091	phosphatidylinositol binding	molecular_function	21	39262	0	0	1.38174	BnaA10g23580D,BnaA10g30470D,BnaC03g02880D,BnaC07g43680D,BnaC09g48300D,BnaA10g11910D,BnaA03g51930D,BnaA07g36340D,BnaC09g49290D,BnaA06g09920D,BnaAnng01620D,BnaC07g05320D,BnaC05g11540D,BnaA01g28370D,BnaA09g56730D,BnaCnng31920D,BnaC01g06300D,BnaC08g38980D,BnaC01g35630D,BnaA01g04770D,BnaA03g55530D
GO:0004664	prephenate dehydratase activity	molecular_function	21	39262	0.00081263	0.00178128	1.31894	BnaCnng34620D,BnaC03g53780D,BnaA09g48960D,BnaA06g19810D,BnaC04g39340D,BnaC08g43260D,BnaA08g25130D,BnaC03g35390D,BnaC08g15080D,BnaA05g29990D,BnaC05g44320D,BnaA06g07360D,BnaA03g30110D,BnaC06g39560D,BnaA02g05780D,BnaC09g36370D,BnaC08g43250D,BnaC05g08770D,BnaA10g13820D,BnaAnng42020D,BnaA04g16070D
GO:0043169	cation binding	molecular_function	21	39262	0.00575387	0.011315	1.26159	BnaC01g22960D,BnaA10g26450D,BnaA07g28350D,BnaA05g07860D,BnaA10g25820D,BnaA05g36120D,BnaC05g31620D,BnaCnng02680D,BnaA05g05660D,BnaA03g23880D,BnaCnng67200D,BnaCnng20610D,BnaC05g01880D,BnaC06g36810D,BnaA07g32360D,BnaA01g19130D,BnaAnng07370D,BnaC04g08890D,BnaC06g30880D,BnaC04g05440D,BnaA10g01800D
GO:0005544	calcium-dependent phospholipid binding	molecular_function	21	39262	0.116151	0.171104	1.11602	BnaC06g08410D,BnaC09g46400D,BnaC05g27530D,BnaC03g21590D,BnaC04g45910D,BnaA04g22190D,BnaAnng37420D,BnaC03g49290D,BnaA08g06260D,BnaC04g45920D,BnaC09g44350D,BnaA03g18070D,BnaC08g06690D,BnaC01g16910D,BnaC02g43450D,BnaA06g23960D,BnaAnng04520D,BnaA10g22010D,BnaC03g21600D,BnaA03g18080D,BnaA04g22180D
GO:0043022	ribosome binding	molecular_function	21	39262	0.309478	0.401565	1.03631	BnaA09g35240D,BnaC07g44180D,BnaCnng74170D,BnaC07g12330D,BnaC01g04940D,BnaA03g52440D,BnaA06g35980D,BnaA04g03450D,BnaA07g09420D,BnaA08g11850D,BnaC08g26570D,BnaC07g19140D,BnaA01g03600D,BnaA09g29060D,BnaA08g19830D,BnaC07g21160D,BnaC03g66710D,BnaC04g25350D,BnaA07g27940D,BnaC05g20200D,BnaC03g57360D
GO:0004084	branched-chain-amino-acid transaminase activity	molecular_function	21	39262	0.65576	0.75548	0.93602	BnaA09g57250D,BnaA06g15650D,BnaA08g02290D,BnaC08g13960D,BnaC08g48510D,BnaC03g68450D,BnaA02g12300D,BnaAnng29280D,BnaC08g42400D,BnaA06g37960D,BnaC08g13970D,BnaC03g41100D,BnaCnng26670D,BnaC05g07810D,BnaA08g26000D,BnaA06g37970D,BnaC06g03270D,BnaC05g33030D,BnaC03g68440D,BnaA01g20890D,BnaA08g26010D
GO:0008725	DNA-3-methyladenine glycosylase activity	molecular_function	20	39262	0	0	1.38174	BnaA09g56480D,BnaA01g30360D,BnaC02g20480D,BnaC01g38620D,BnaA02g22810D,BnaAnng32020D,BnaC02g31120D,BnaC02g46050D,BnaC06g35890D,BnaA07g35250D,BnaC08g16840D,BnaC05g40490D,BnaA07g20120D,BnaC06g40160D,BnaA08g23690D,BnaC08g38570D,BnaC05g49360D,BnaA05g26470D,BnaC06g19570D,BnaA06g08670D
GO:2001070	starch binding	molecular_function	20	39262	0.00112301	0.00241653	1.31595	BnaC08g15040D,BnaA05g01890D,BnaCnng18120D,BnaCnng00540D,BnaC04g01600D,BnaC02g48400D,BnaA03g00450D,BnaA02g31620D,BnaC08g45130D,BnaC09g03660D,BnaC05g04910D,BnaA09g04240D,BnaA07g04640D,BnaAnng15770D,BnaA10g04550D,BnaC08g01990D,BnaA06g07310D,BnaA08g25180D,BnaC03g00340D,BnaA08g28830D
GO:0030151	molybdenum ion binding	molecular_function	20	39262	0.00764103	0.0149014	1.25613	BnaA02g18610D,BnaC09g24770D,BnaA02g25010D,BnaC09g18290D,BnaA09g22770D,BnaCnng18210D,BnaC05g12650D,BnaA09g17260D,BnaC05g11700D,BnaA07g20840D,BnaA06g38330D,BnaC06g20690D,BnaA09g17270D,BnaC09g18300D,BnaAnng05210D,BnaC06g38300D,BnaCnng60930D,BnaA07g33690D,BnaC02g33150D,BnaA06g10080D
GO:0003989	acetyl-CoA carboxylase activity	molecular_function	20	39262	0.0274563	0.0477147	1.20152	BnaA03g17570D,BnaC06g34180D,BnaA03g06000D,BnaC02g06560D,BnaA10g18680D,BnaC03g07000D,BnaC08g06560D,BnaC05g37990D,BnaAnng22560D,BnaA03g05470D,BnaA05g06620D,BnaC03g21010D,BnaC09g42420D,BnaC04g07230D,BnaC09g27620D,BnaA10g13960D,BnaA08g06180D,BnaC09g27690D,BnaC03g07750D,BnaAnng41100D
GO:0004540	ribonuclease activity	molecular_function	20	39262	0.0274563	0.0477147	1.20152	BnaC04g02780D,BnaC03g47810D,BnaA06g25800D,BnaA10g27250D,BnaCnng11330D,BnaC05g49020D,BnaCnng00540D,BnaC07g30070D,BnaA09g09170D,BnaC08g45620D,BnaA07g04640D,BnaA06g26890D,BnaA10g29620D,BnaA02g06610D,BnaC09g09400D,BnaA02g18230D,BnaC09g35310D,BnaA10g02780D,BnaA05g03220D,BnaCnng03580D
GO:0004849	uridine kinase activity	molecular_function	20	39262	0.0274563	0.0477147	1.20152	BnaA06g32350D,BnaC09g32570D,BnaCnng22200D,BnaA08g19620D,BnaC03g70860D,BnaA02g16610D,BnaCnng29680D,BnaA08g00260D,BnaA02g28680D,BnaC04g32990D,BnaC02g36730D,BnaA07g37030D,BnaC02g22530D,BnaC07g24060D,BnaA01g15630D,BnaA02g26900D,BnaA10g10140D,BnaC07g12180D,BnaC01g18640D,BnaA04g10680D
GO:0005351	sugar:proton symporter activity	molecular_function	20	39262	0.0694395	0.108826	1.15145	BnaA01g02070D,BnaA06g23940D,BnaC07g45560D,BnaA09g07070D,BnaA03g53270D,BnaA04g24910D,BnaC03g49310D,BnaC01g03220D,BnaA04g01650D,BnaUnng00460D,BnaC04g48740D,BnaCnng31630D,BnaA04g11360D,BnaA09g37700D,BnaC09g06770D,BnaC08g48850D,BnaA08g15010D,BnaC03g62270D,BnaC04g23090D,BnaA03g20150D
GO:0046923	ER retention sequence binding	molecular_function	20	39262	0.47312	0.569068	0.986959	BnaAnng21400D,BnaC03g60180D,BnaAnng32910D,BnaA08g17990D,BnaA03g37630D,BnaA09g26900D,BnaC06g36420D,BnaCnng70760D,BnaCnng62290D,BnaA09g43350D,BnaA07g21590D,BnaCnng21930D,BnaC05g22350D,BnaCnng00150D,BnaC06g22200D,BnaC07g47610D,BnaC08g35960D,BnaC06g17760D,BnaA07g05160D,BnaA08g16910D
GO:0003913	DNA photolyase activity	molecular_function	19	39262	0	0	1.38174	BnaC09g25510D,BnaAnng13370D,BnaA09g04780D,BnaC09g04250D,BnaC01g35960D,BnaC08g15570D,BnaC05g02520D,BnaA05g00370D,BnaA08g27870D,BnaC09g04290D,BnaA06g27280D,BnaC07g29710D,BnaA08g24780D,BnaAnng36630D,BnaCnng71870D,BnaC08g00670D,BnaA01g28630D,BnaC01g35950D,BnaA10g02550D
GO:0004345	glucose-6-phosphate dehydrogenase activity	molecular_function	19	39262	0	0	1.38174	BnaC07g11270D,BnaC03g05780D,BnaCnng48180D,BnaA08g30000D,BnaA07g08970D,BnaC09g43980D,BnaA07g15160D,BnaA08g26430D,BnaC07g24170D,BnaA09g01980D,BnaC06g13190D,BnaA08g31100D,BnaCnng06870D,BnaA03g04190D,BnaC09g01420D,BnaCnng78750D,BnaA10g20180D,BnaA06g32220D,BnaAnng27690D
GO:0004506	squalene monooxygenase activity	molecular_function	19	39262	0.0101303	0.019343	1.25015	BnaA02g37030D,BnaA06g26720D,BnaA09g04980D,BnaA04g13320D,BnaC09g04540D,BnaA04g06060D,BnaA09g14650D,BnaC09g15310D,BnaA01g00280D,BnaC07g30250D,BnaC02g41470D,BnaC01g01280D,BnaA02g37020D,BnaA02g32720D,BnaA06g26710D,BnaC02g41390D,BnaC04g28910D,BnaC07g30260D,BnaC04g35400D
GO:0003995	acyl-CoA dehydrogenase activity	molecular_function	19	39262	0.0350235	0.0591763	1.19332	BnaC03g49190D,BnaC05g04350D,BnaC09g06780D,BnaA09g32380D,BnaA10g28090D,BnaA04g05950D,BnaA10g28060D,BnaC03g55280D,BnaC08g23150D,BnaCnng35000D,BnaA09g07080D,BnaC05g04370D,BnaA05g30630D,BnaA06g24040D,BnaA03g16270D,BnaC04g28570D,BnaA06g38800D,BnaA01g18160D,BnaC05g45090D
GO:0004659	prenyltransferase activity	molecular_function	19	39262	0.0854713	0.1312	1.14144	BnaC01g23240D,BnaC04g49670D,BnaC08g23140D,BnaA03g32030D,BnaC05g41280D,BnaA01g22440D,BnaC01g15470D,BnaC07g02590D,BnaC04g03820D,BnaA03g32040D,BnaA07g01280D,BnaA04g25760D,BnaA05g04080D,BnaA05g27150D,BnaC01g28660D,BnaA01g19280D,BnaC07g50260D,BnaA09g32370D,BnaA01g13340D
GO:0004579	dolichyl-diphosphooligosaccharide-protein glycotransferase activity	molecular_function	19	39262	0.519974	0.617657	0.972338	BnaC03g64370D,BnaA09g07760D,BnaA05g16320D,BnaC03g10490D,BnaA03g58520D,BnaA09g24550D,BnaC07g36590D,BnaC06g37140D,BnaA06g34690D,BnaA01g11060D,BnaC09g07890D,BnaA07g12390D,BnaA07g32680D,BnaC02g47730D,BnaC07g21050D,BnaC07g16630D,BnaA02g25880D,BnaC01g12560D,BnaCnng43870D
GO:0032549	ribonucleoside binding	molecular_function	19	39262	0.879214	0.950939	0.846875	BnaA07g07550D,BnaC04g01050D,BnaC07g36840D,BnaA05g22140D,BnaAnng33830D,BnaCnng17670D,BnaC01g27060D,BnaA03g44840D,BnaC07g09390D,BnaA08g10000D,BnaCnng64900D,BnaC03g23920D,BnaC01g13030D,BnaAnng05440D,BnaC07g02860D,BnaA02g06560D,BnaC01g13040D,BnaA01g11530D,BnaCnng72590D
GO:0008107	galactoside 2-alpha-L-fucosyltransferase activity	molecular_function	19	39262	0.990535	1	0.729253	BnaAnng36810D,BnaA08g24120D,BnaA07g03820D,BnaA09g45840D,BnaC06g23050D,BnaC07g22150D,BnaC05g10350D,BnaCnng39570D,BnaA09g45850D,BnaA06g38160D,BnaC08g39910D,BnaA06g33800D,BnaA07g22250D,BnaA08g24090D,BnaC07g22140D,BnaC05g10370D,BnaC08g16010D,BnaCnng39900D,BnaA06g33810D
GO:0004616	phosphogluconate dehydrogenase (decarboxylating) activity	molecular_function	18	39262	0.00214466	0.00446872	1.30902	BnaC05g13730D,BnaA02g35580D,BnaA08g09990D,BnaCnng11100D,BnaC06g01480D,BnaC08g03060D,BnaC05g14020D,BnaC05g48310D,BnaC03g64520D,BnaC09g11930D,BnaA09g11470D,BnaA06g04150D,BnaA01g33010D,BnaA06g12420D,BnaA05g33580D,BnaA06g11890D,BnaA09g11480D,BnaA04g11280D
GO:0005199	structural constituent of cell wall	molecular_function	18	39262	0.00214466	0.00446872	1.30902	BnaA04g19780D,BnaA09g29940D,BnaA04g27750D,BnaA07g21170D,BnaC06g18710D,BnaUnng00730D,BnaA08g19680D,BnaAnng34230D,BnaC04g44160D,BnaAnng39600D,BnaC08g25360D,BnaC06g15300D,BnaA07g37340D,BnaC05g50900D,BnaCnng70250D,BnaC06g34980D,BnaA07g31240D,BnaA08g20330D
GO:0004332	fructose-bisphosphate aldolase activity	molecular_function	18	39262	0.0445296	0.0733533	1.18435	BnaC08g35820D,BnaA02g27140D,BnaA06g37230D,BnaC06g14270D,BnaA07g15900D,BnaC03g60280D,BnaC02g33660D,BnaC01g00070D,BnaA08g16820D,BnaC07g47470D,BnaA04g05120D,BnaC08g24100D,BnaCnng50220D,BnaA04g12130D,BnaC01g18640D,BnaA09g33290D,BnaC04g33570D,BnaAnng07310D
GO:0008374	O-acyltransferase activity	molecular_function	18	39262	0.196237	0.272478	1.08136	BnaC07g36060D,BnaCnng72190D,BnaC01g41270D,BnaC09g43460D,BnaA10g29880D,BnaA03g44190D,BnaC05g02240D,BnaC02g04910D,BnaC05g47870D,BnaA10g02340D,BnaA09g50730D,BnaA02g01770D,BnaCnng52810D,BnaA01g10270D,BnaA07g36000D,BnaA05g32550D,BnaAnng30990D,BnaC08g43660D
GO:0008430	selenium binding	molecular_function	18	39262	0.312543	0.40398	1.03631	BnaC01g07140D,BnaC08g08300D,BnaCnng60210D,BnaA08g07540D,BnaC04g36410D,BnaAnng30070D,BnaA08g07580D,BnaC08g08310D,BnaC03g12410D,BnaA07g06240D,BnaC03g72270D,BnaC08g08320D,BnaA04g06360D,BnaCnng35500D,BnaAnng17380D,BnaC09g33940D,BnaA01g05890D,BnaA04g14400D
GO:0008515	sucrose transmembrane transporter activity	molecular_function	18	39262	0.312543	0.40398	1.03631	BnaA07g23350D,BnaC07g13570D,BnaC08g42460D,BnaA02g26600D,BnaA07g29680D,BnaC02g20830D,BnaA09g30430D,BnaA09g57200D,BnaA06g05900D,BnaC06g32880D,BnaC05g17970D,BnaC05g49240D,BnaC02g34840D,BnaA02g15620D,BnaA07g10320D,BnaC07g21980D,BnaCnng07770D,BnaA06g33960D
GO:0033926	glycopeptide alpha-N-acetylgalactosaminidase activity	molecular_function	18	39262	0.441087	0.542368	0.994855	BnaC08g06790D,BnaC05g17920D,BnaC01g03610D,BnaA08g06300D,BnaC03g28560D,BnaC03g65720D,BnaC05g45320D,BnaA03g24030D,BnaA03g41490D,BnaA05g34980D,BnaA10g13840D,BnaA05g30860D,BnaC09g36460D,BnaA01g02350D,BnaAnng38240D,BnaC04g18190D,BnaA03g59380D,BnaA09g30480D
GO:0004351	glutamate decarboxylase activity	molecular_function	18	39262	0.567929	0.666911	0.956591	BnaA07g25530D,BnaA06g19240D,BnaC06g27330D,BnaA02g26140D,BnaC03g54190D,BnaC04g12030D,BnaA03g06540D,BnaC02g34260D,BnaC09g40620D,BnaA03g06510D,BnaAnng27540D,BnaA03g06580D,BnaC04g12040D,BnaC03g08350D,BnaA09g18890D,BnaA03g06520D,BnaC09g52280D,BnaCnng71810D
GO:0004739	pyruvate dehydrogenase (acetyl-transferring) activity	molecular_function	17	39262	0	0	1.38174	BnaA09g51510D,BnaC03g16370D,BnaC06g31170D,BnaC02g16000D,BnaC01g28440D,BnaA07g09080D,BnaA01g22040D,BnaC07g12860D,BnaA07g28560D,BnaA10g00730D,BnaC08g46110D,BnaC05g00810D,BnaA10g05930D,BnaC09g26770D,BnaA03g13490D,BnaA09g29700D,BnaA02g11520D
GO:0019887	protein kinase regulator activity	molecular_function	17	39262	0	0	1.38174	BnaA05g04230D,BnaC03g24910D,BnaA09g38340D,BnaC07g34490D,BnaA01g08530D,BnaA03g20850D,BnaC06g42820D,BnaC04g05080D,BnaC02g33100D,BnaA04g10920D,BnaA03g43190D,BnaA06g35590D,BnaCnng44870D,BnaC08g30500D,BnaC07g19930D,BnaA02g24960D,BnaC01g10230D
GO:0004550	nucleoside diphosphate kinase activity	molecular_function	17	39262	0.00296374	0.00600788	1.30498	BnaA09g22160D,BnaC02g28980D,BnaC03g51050D,BnaCnng15800D,BnaA01g13520D,BnaC03g70690D,BnaC09g51980D,BnaA09g06530D,BnaA06g22660D,BnaC08g48350D,BnaA08g23130D,BnaC01g15740D,BnaC09g26080D,BnaA08g00390D,BnaCnng73880D,BnaA02g21890D,BnaA09g17360D
GO:0016168	chlorophyll binding	molecular_function	17	39262	0.00296374	0.00600788	1.30498	BnaC05g32120D,BnaC03g60960D,BnaC09g27520D,BnaC04g24900D,BnaC03g59670D,BnaC06g07480D,BnaC04g29390D,BnaC05g32130D,BnaA06g00210D,BnaA08g00380D,BnaA06g19420D,BnaC05g23270D,BnaA05g13640D,BnaA09g26140D,BnaC06g11040D,BnaA06g19430D,BnaC03g70700D
GO:0008831	dTDP-4-dehydrorhamnose reductase activity	molecular_function	17	39262	0.0177073	0.031815	1.2363	BnaA01g29180D,BnaC05g38810D,BnaC01g36590D,BnaCnng31530D,BnaA06g00900D,BnaA06g11470D,BnaC06g38990D,BnaCnng72830D,BnaC02g27520D,BnaA02g36450D,BnaCnng35880D,BnaA09g12970D,BnaC06g06370D,BnaC09g12890D,BnaA05g24780D,BnaA06g08030D,BnaC05g13120D
GO:0008083	growth factor activity	molecular_function	17	39262	0.356947	0.454548	1.02129	BnaCnng02630D,BnaC02g16840D,BnaA01g20950D,BnaC01g26290D,BnaC03g48770D,BnaA09g46190D,BnaC08g40250D,BnaAnng04050D,BnaC01g23910D,BnaA04g13330D,BnaC04g35420D,BnaC08g21380D,BnaA06g08580D,BnaAnng03380D,BnaA06g24820D,BnaA08g15770D,BnaA10g26410D
GO:0008757	S-adenosylmethionine-dependent methyltransferase activity	molecular_function	17	39262	0.356947	0.454548	1.02129	BnaCnng20770D,BnaC09g08990D,BnaC04g03200D,BnaAnng25980D,BnaC01g18770D,BnaA07g32310D,BnaC02g12740D,BnaC04g49360D,BnaA05g03610D,BnaA10g10010D,BnaA04g25470D,BnaCnng74930D,BnaC09g32470D,BnaC04g49370D,BnaC06g36760D,BnaA01g15720D,BnaA04g25480D
GO:0004014	adenosylmethionine decarboxylase activity	molecular_function	17	39262	0.725297	0.813361	0.903447	BnaA10g18360D,BnaC05g48280D,BnaC09g41900D,BnaAnng08590D,BnaC05g22370D,BnaC03g07500D,BnaA05g33510D,BnaA03g07430D,BnaAnng36830D,BnaC03g09400D,BnaC06g00140D,BnaC03g32940D,BnaA03g05780D,BnaA10g16110D,BnaAnng38530D,BnaA03g27900D,BnaC09g38970D
GO:0004834	tryptophan synthase activity	molecular_function	17	39262	0.972542	1	0.75773	BnaA09g34470D,BnaC09g00060D,BnaA09g09540D,BnaA08g25220D,BnaA03g48400D,BnaC04g30980D,BnaC09g31260D,BnaC07g40410D,BnaCnng41850D,BnaA04g08710D,BnaA04g27890D,BnaA09g00950D,BnaA06g13600D,BnaC04g34370D,BnaA10g09090D,BnaA07g14490D,BnaC08g25400D
GO:0031625	ubiquitin protein ligase binding	molecular_function	17	39262	0.984408	1	0.734051	BnaAnng00170D,BnaC03g30850D,BnaA03g26120D,BnaA09g17890D,BnaCnng12340D,BnaC09g19210D,BnaC04g32030D,BnaC07g18980D,BnaA09g00890D,BnaA06g36120D,BnaC04g26900D,BnaC02g32140D,BnaA02g24350D,BnaC09g00020D,BnaC05g50950D,BnaA08g19930D,BnaA09g29300D
GO:0004523	RNA-DNA hybrid ribonuclease activity	molecular_function	17	39262	0.999997	1	0.533855	BnaC02g14220D,BnaC02g12010D,BnaC01g06950D,BnaC09g13610D,BnaC05g50790D,BnaC04g37540D,BnaC02g15320D,BnaA01g11260D,BnaAnng28620D,BnaA03g27460D,BnaCnng72290D,BnaA09g29810D,BnaC06g05480D,BnaA09g55870D,BnaA02g13760D,BnaCnng05640D,BnaC04g51870D
GO:0008967	phosphoglycolate phosphatase activity	molecular_function	16	39262	0	0	1.38174	BnaA04g19290D,BnaCnng36750D,BnaA03g15360D,BnaAnng29390D,BnaA06g09100D,BnaA09g17290D,BnaAnng05260D,BnaC02g14030D,BnaCnng52020D,BnaA04g23780D,BnaC04g47560D,BnaC03g18570D,BnaC09g18280D,BnaA10g07100D,BnaCnng55890D,BnaC05g10540D
GO:0004470	malic enzyme activity	molecular_function	16	39262	0.00409562	0.00820122	1.30046	BnaC02g03980D,BnaA09g51860D,BnaA03g27070D,BnaC07g29000D,BnaCnng60330D,BnaC09g08590D,BnaA07g21550D,BnaC06g22080D,BnaC07g01180D,BnaA06g27940D,BnaCnng02240D,BnaA03g03440D,BnaC03g04930D,BnaA02g35010D,BnaA07g00860D,BnaA09g08320D
GO:0015369	calcium:proton antiporter activity	molecular_function	16	39262	0.00409562	0.00820122	1.30046	BnaC03g37860D,BnaA03g41510D,BnaA03g32760D,BnaA04g21850D,BnaA05g26020D,BnaC06g11060D,BnaA05g06490D,BnaC05g40050D,BnaA08g00350D,BnaC04g45720D,BnaC01g37750D,BnaCnng03980D,BnaC04g07160D,BnaA01g29870D,BnaA10g27650D,BnaC07g32560D
GO:0008641	small protein activating enzyme activity	molecular_function	16	39262	0.0233376	0.0407725	1.22822	BnaA04g17280D,BnaC04g40890D,BnaA10g30270D,BnaC04g33460D,BnaA05g12250D,BnaC09g49100D,BnaC03g16630D,BnaC04g14640D,BnaC09g38430D,BnaA10g15880D,BnaA03g07510D,BnaA04g12210D,BnaC03g09520D,BnaA09g43160D,BnaC08g35680D,BnaA03g13720D
GO:0047800	cysteamine dioxygenase activity	molecular_function	16	39262	0.0233376	0.0407725	1.22822	BnaC03g23820D,BnaA09g55210D,BnaC03g06750D,BnaA03g05200D,BnaA03g56660D,BnaA10g29030D,BnaC08g29380D,BnaC05g14170D,BnaC04g23450D,BnaA04g09690D,BnaA06g12620D,BnaCnng47880D,BnaA05g03130D,BnaA04g01890D,BnaC04g52520D,BnaC05g20060D
GO:0000049	tRNA binding	molecular_function	16	39262	0.0711951	0.111471	1.16357	BnaC03g50160D,BnaC04g01490D,BnaC04g33290D,BnaA07g17620D,BnaA09g38230D,BnaA09g37290D,BnaA09g42950D,BnaC08g29030D,BnaC08g30200D,BnaC06g16310D,BnaA04g12390D,BnaC08g49240D,BnaA06g23200D,BnaA05g01810D,BnaA04g06620D,BnaC04g29310D
GO:0003917	DNA topoisomerase type I activity	molecular_function	16	39262	0.154952	0.221129	1.10539	BnaA04g01750D,BnaC09g31620D,BnaA03g14820D,BnaC02g13170D,BnaC03g17870D,BnaA01g05990D,BnaC02g42810D,BnaC01g14640D,BnaC03g17880D,BnaA10g09510D,BnaA02g33960D,BnaC01g07250D,BnaA02g09140D,BnaC07g43200D,BnaC04g23260D,BnaA03g51370D
GO:0005315	inorganic phosphate transmembrane transporter activity	molecular_function	16	39262	0.154952	0.221129	1.10539	BnaA05g06210D,BnaC04g46050D,BnaC07g23650D,BnaAnng14200D,BnaA04g22280D,BnaA06g32820D,BnaC03g18410D,BnaC03g72240D,BnaA02g22250D,BnaA05g06230D,BnaCnng37050D,BnaC04g06470D,BnaA05g06200D,BnaA03g18250D,BnaC09g01110D,BnaA06g36740D
GO:0008519	ammonium transmembrane transporter activity	molecular_function	16	39262	0.154952	0.221129	1.10539	BnaC04g07100D,BnaA09g00320D,BnaCnng62050D,BnaA05g06450D,BnaA01g23190D,BnaA04g21900D,BnaC04g07090D,BnaUnng02430D,BnaC03g74280D,BnaC04g56650D,BnaA07g05760D,BnaA03g37270D,BnaC06g11810D,BnaC08g08610D,BnaA05g35560D,BnaCnng01740D
GO:0008964	phosphoenolpyruvate carboxylase activity	molecular_function	16	39262	0.270672	0.359074	1.05276	BnaC04g02430D,BnaA03g33640D,BnaC05g38590D,BnaA05g24610D,BnaCnng24040D,BnaC03g69540D,BnaA09g28740D,BnaC05g20500D,BnaC06g09980D,BnaC04g48440D,BnaC01g36480D,BnaA08g01200D,BnaA04g24600D,BnaA05g34260D,BnaC03g38810D,BnaC01g36490D
GO:0030976	thiamine pyrophosphate binding	molecular_function	16	39262	0.66452	0.762367	0.921162	BnaC09g18140D,BnaA10g09270D,BnaCnng03960D,BnaAnng13920D,BnaA01g20380D,BnaA02g14110D,BnaC02g18740D,BnaCnng13340D,BnaC09g31460D,BnaC01g25380D,BnaA10g17340D,BnaA07g37870D,BnaC09g40570D,BnaA06g24700D,BnaA09g17390D,BnaCnng40160D
GO:0080019	fatty-acyl-CoA reductase (alcohol-forming) activity	molecular_function	16	39262	0.996901	1	0.669936	BnaCnng20450D,BnaC03g66380D,BnaC03g53920D,BnaCnng47950D,BnaA06g18840D,BnaA08g11440D,BnaA04g02700D,BnaA07g16940D,BnaA04g02710D,BnaC09g36490D,BnaA07g17030D,BnaCnng38260D,BnaA06g19780D,BnaA10g13850D,BnaC03g54750D,BnaC02g09540D
GO:0004867	serine-type endopeptidase inhibitor activity	molecular_function	16	39262	1	1	0.409405	BnaC01g42640D,BnaCnng69800D,BnaC02g37750D,BnaA04g20550D,BnaC04g53710D,BnaC06g01160D,BnaC08g48750D,BnaAnng03910D,BnaA01g22190D,BnaA10g28610D,BnaC03g21710D,BnaA04g11270D,BnaC04g45990D,BnaA09g11360D,BnaA04g20540D,BnaC02g21010D
GO:0009001	serine O-acetyltransferase activity	molecular_function	15	39262	0.00565973	0.0111432	1.29538	BnaC03g70970D,BnaA05g26160D,BnaC09g33290D,BnaC06g11170D,BnaA08g00140D,BnaC03g13300D,BnaA10g10890D,BnaC04g10980D,BnaC05g40290D,BnaA03g10610D,BnaA06g00050D,BnaCnng25440D,BnaC03g47870D,BnaA06g25690D,BnaA05g13500D
GO:0003747	translation release factor activity	molecular_function	15	39262	0.0306855	0.0521147	1.21919	BnaC06g12020D,BnaA05g00820D,BnaA04g00290D,BnaC09g13000D,BnaAnng27520D,BnaCnng18880D,BnaCnng09320D,BnaC08g32590D,BnaCnng48150D,BnaA09g12670D,BnaA03g59530D,BnaC04g00470D,BnaC08g28120D,BnaA09g23650D,BnaC04g21100D
GO:0008508	bile acid:sodium symporter activity	molecular_function	15	39262	0.0306855	0.0521147	1.21919	BnaA03g24950D,BnaC06g38980D,BnaA07g04860D,BnaA09g21160D,BnaA03g45590D,BnaC03g73000D,BnaC07g37650D,BnaC09g23540D,BnaC04g06630D,BnaA05g06370D,BnaC09g23550D,BnaC04g45930D,BnaCnng00360D,BnaA07g39100D,BnaA04g22200D
GO:0019001	guanyl nucleotide binding	molecular_function	15	39262	0.0894694	0.136066	1.15145	BnaA08g11230D,BnaA05g16520D,BnaC01g04010D,BnaC05g24110D,BnaC04g35930D,BnaA01g02740D,BnaC08g41460D,BnaC03g66160D,BnaC07g45020D,BnaC08g33050D,BnaC05g29120D,BnaA09g40600D,BnaC01g04000D,BnaA04g13660D,BnaA09g24710D
GO:0031683	G-protein beta/gamma-subunit complex binding	molecular_function	15	39262	0.0894694	0.136066	1.15145	BnaA08g11230D,BnaA05g16520D,BnaC01g04010D,BnaC05g24110D,BnaC04g35930D,BnaA01g02740D,BnaC08g41460D,BnaC03g66160D,BnaC07g45020D,BnaC08g33050D,BnaC05g29120D,BnaA09g40600D,BnaC01g04000D,BnaA04g13660D,BnaA09g24710D
GO:0016872	intramolecular lyase activity	molecular_function	15	39262	0.186932	0.263339	1.09085	BnaA10g25120D,BnaC07g45760D,BnaAnng37160D,BnaC08g26010D,BnaC06g06390D,BnaA06g00880D,BnaCnng45660D,BnaC09g50050D,BnaC04g20870D,BnaC08g26020D,BnaA09g55750D,BnaA04g15400D,BnaA04g00080D,BnaA07g37900D,BnaA09g34840D
GO:0016987	sigma factor activity	molecular_function	15	39262	0.314853	0.405023	1.03631	BnaC05g06190D,BnaA02g20170D,BnaC08g13610D,BnaAnng21640D,BnaCnng23900D,BnaC03g20440D,BnaA09g04990D,BnaA04g04490D,BnaA04g21190D,BnaC07g30280D,BnaC09g04550D,BnaA06g04930D,BnaA06g26690D,BnaA08g26880D,BnaC04g26820D
GO:0005452	inorganic anion exchanger activity	molecular_function	15	39262	0.456234	0.558904	0.986959	BnaC03g72490D,BnaA03g21650D,BnaA05g00740D,BnaC03g34730D,BnaC04g51480D,BnaAnng31830D,BnaA02g35930D,BnaA01g04520D,BnaC04g00350D,BnaA03g29440D,BnaC04g21390D,BnaC01g06010D,BnaCnng08280D,BnaA04g26910D,BnaC05g11780D
GO:0003968	RNA-directed RNA polymerase activity	molecular_function	15	39262	0.592952	0.691848	0.942098	BnaC07g01170D,BnaA07g00840D,BnaC08g36490D,BnaA10g12910D,BnaC04g24450D,BnaC07g01150D,BnaC07g01120D,BnaC01g42570D,BnaA06g09600D,BnaCnng57100D,BnaAnng27300D,BnaA07g00770D,BnaA07g00800D,BnaA09g22040D,BnaC05g10980D
GO:0004630	phospholipase D activity	molecular_function	15	39262	0.592952	0.691848	0.942098	BnaC07g45790D,BnaA02g32010D,BnaA03g24870D,BnaC07g29390D,BnaAnng13600D,BnaA03g24880D,BnaAnng08250D,BnaCnng23890D,BnaC06g07140D,BnaA05g23740D,BnaC05g37540D,BnaA10g00160D,BnaA06g00490D,BnaC02g40590D,BnaC01g35830D
GO:0019139	cytokinin dehydrogenase activity	molecular_function	15	39262	0.711665	0.800805	0.901137	BnaA03g49660D,BnaC08g32840D,BnaAnng09190D,BnaCnng41060D,BnaC07g50850D,BnaC06g36220D,BnaA02g05340D,BnaA04g23980D,BnaA03g19500D,BnaC09g36710D,BnaC04g01930D,BnaC03g23380D,BnaA02g08420D,BnaA09g40400D,BnaC04g47740D
GO:0003857	3-hydroxyacyl-CoA dehydrogenase activity	molecular_function	14	39262	0	0	1.38174	BnaA03g29710D,BnaA05g24320D,BnaA05g30610D,BnaC08g13270D,BnaCnng62430D,BnaA01g32550D,BnaC05g45070D,BnaC05g38330D,BnaA01g07910D,BnaA04g11760D,BnaC01g09510D,BnaA08g30740D,BnaC07g41660D,BnaC03g34950D
GO:0003916	DNA topoisomerase activity	molecular_function	14	39262	0	0	1.38174	BnaA04g01750D,BnaC08g39590D,BnaA03g14820D,BnaC03g17870D,BnaA01g05990D,BnaA03g31350D,BnaC03g36740D,BnaC02g42810D,BnaC01g14640D,BnaA02g33960D,BnaC01g07250D,BnaC07g43200D,BnaC04g23260D,BnaA03g51370D
GO:0003999	adenine phosphoribosyltransferase activity	molecular_function	14	39262	0	0	1.38174	BnaC07g37320D,BnaA08g18960D,BnaA09g27900D,BnaA02g00860D,BnaA03g45390D,BnaC09g45400D,BnaA10g21290D,BnaCnng33750D,BnaC05g51080D,BnaA07g35830D,BnaA07g19820D,BnaC03g57700D,BnaCnng53700D,BnaCnng20130D
GO:0004416	hydroxyacylglutathione hydrolase activity	molecular_function	14	39262	0	0	1.38174	BnaC04g02920D,BnaA05g11390D,BnaA09g50050D,BnaCnng46950D,BnaA05g03320D,BnaC04g48930D,BnaC03g24200D,BnaC03g17440D,BnaA04g25070D,BnaA03g20230D,BnaCnng30690D,BnaA03g14380D,BnaC08g44630D,BnaA05g28080D
GO:0004478	methionine adenosyltransferase activity	molecular_function	14	39262	0	0	1.38174	BnaCnng75920D,BnaA05g00770D,BnaA03g26530D,BnaA03g16860D,BnaA09g00390D,BnaA03g34510D,BnaCnng16700D,BnaA01g36920D,BnaC04g08360D,BnaC03g39970D,BnaC04g00410D,BnaC03g31390D,BnaC03g20310D,BnaA05g07530D
GO:0008308	voltage-gated anion channel activity	molecular_function	14	39262	0	0	1.38174	BnaC03g12920D,BnaC03g32540D,BnaA03g27530D,BnaA10g29750D,BnaA02g02470D,BnaC09g32780D,BnaCnng52100D,BnaCnng42590D,BnaA10g11490D,BnaCnng35410D,BnaA05g37480D,BnaCnng35390D,BnaA03g10240D,BnaCnng05760D
GO:0005086	ARF guanyl-nucleotide exchange factor activity	molecular_function	14	39262	0.00782112	0.015127	1.28963	BnaA01g02040D,BnaA07g14720D,BnaCnng11970D,BnaA10g15550D,BnaC05g10230D,BnaCnng09000D,BnaA06g08910D,BnaCnng34260D,BnaA04g01040D,BnaC04g31600D,BnaA04g09370D,BnaC04g55240D,BnaC01g03180D,BnaA06g40870D
GO:0016841	ammonia-lyase activity	molecular_function	14	39262	0.00782112	0.015127	1.28963	BnaA04g21230D,BnaAnng17700D,BnaA05g07370D,BnaA04g21240D,BnaC05g42780D,BnaCnng52250D,BnaA09g33560D,BnaA04g04830D,BnaC08g24360D,BnaA05g28470D,BnaC04g08190D,BnaC06g14510D,BnaA07g16060D,BnaA04g11940D
GO:0033897	ribonuclease T2 activity	molecular_function	14	39262	0.00782112	0.015127	1.28963	BnaA04g07260D,BnaC08g39810D,BnaA09g45670D,BnaC07g12500D,BnaA07g09330D,BnaC04g55920D,BnaA02g26660D,BnaC07g22040D,BnaA09g45680D,BnaCnng39460D,BnaA09g45690D,BnaC08g39800D,BnaA08g24060D,BnaC08g16040D
GO:0047325	inositol tetrakisphosphate 1-kinase activity	molecular_function	14	39262	0.00782112	0.015127	1.28963	BnaC01g04480D,BnaA03g50630D,BnaA01g03220D,BnaA03g38640D,BnaC04g03240D,BnaA10g17710D,BnaC03g07940D,BnaC09g41080D,BnaAnng34680D,BnaC04g03250D,BnaA03g06170D,BnaCnng47190D,BnaC07g44490D,BnaA05g03660D
GO:0004096	catalase activity	molecular_function	14	39262	0.040242	0.0667586	1.20903	BnaA03g53180D,BnaA08g10870D,BnaC07g45360D,BnaA07g11370D,BnaC08g19360D,BnaC01g03420D,BnaC07g15270D,BnaA06g14510D,BnaC03g65530D,BnaA08g21730D,BnaC07g15280D,BnaAnng11640D,BnaC05g15970D,BnaA07g11360D
GO:0009678	hydrogen-translocating pyrophosphatase activity	molecular_function	14	39262	0.040242	0.0667586	1.20903	BnaA06g10340D,BnaCnng66360D,BnaC06g39350D,BnaC05g11930D,BnaCnng64390D,BnaC08g38730D,BnaC06g40530D,BnaAnng33120D,BnaA09g56670D,BnaC08g16730D,BnaA07g35600D,BnaA07g34510D,BnaA08g23780D,BnaAnng30840D
GO:0016157	sucrose synthase activity	molecular_function	14	39262	0.040242	0.0667586	1.20903	BnaC09g37040D,BnaA05g12940D,BnaC07g27090D,BnaC03g10290D,BnaC02g31640D,BnaCnng74430D,BnaC06g34330D,BnaA07g30830D,BnaA07g22680D,BnaA03g08110D,BnaC06g12120D,BnaC06g23590D,BnaCnng23260D,BnaA10g14710D
GO:0030410	nicotianamine synthase activity	molecular_function	14	39262	0.111915	0.166506	1.13791	BnaC01g27290D,BnaA01g35270D,BnaA06g05310D,BnaC02g12500D,BnaC09g50280D,BnaA03g01570D,BnaC03g01850D,BnaA02g35470D,BnaC05g06800D,BnaA10g25290D,BnaC09g32590D,BnaA10g10170D,BnaA09g15990D,BnaC01g18590D
GO:0003883	CTP synthase activity	molecular_function	14	39262	0.224145	0.305551	1.07469	BnaA01g10530D,BnaC05g40560D,BnaA09g54360D,BnaA02g20460D,BnaC05g23810D,BnaC01g12060D,BnaC07g08770D,BnaA07g07050D,BnaA05g26520D,BnaC02g28040D,BnaC07g36340D,BnaA03g44510D,BnaC01g38590D,BnaA01g30410D
GO:0004045	aminoacyl-tRNA hydrolase activity	molecular_function	14	39262	0.224145	0.305551	1.07469	BnaC09g41670D,BnaA07g14400D,BnaC05g14130D,BnaA10g18160D,BnaC09g40990D,BnaC03g04490D,BnaC01g42360D,BnaC01g05340D,BnaA10g17620D,BnaC09g51950D,BnaA01g20640D,BnaAnng15190D,BnaA06g12570D,BnaA03g03070D
GO:0008131	primary amine oxidase activity	molecular_function	14	39262	0.645142	0.744813	0.921162	BnaA03g19840D,BnaC03g69740D,BnaC03g23740D,BnaA03g54620D,BnaA08g07750D,BnaC08g47490D,BnaC01g22650D,BnaAnng10300D,BnaC04g48360D,BnaC02g28390D,BnaA08g07730D,BnaA02g21420D,BnaA04g24530D,BnaC04g54940D
GO:0016790	thiolester hydrolase activity	molecular_function	14	39262	0.645142	0.744813	0.921162	BnaAnng26510D,BnaCnng41490D,BnaC05g06160D,BnaA08g26890D,BnaC03g74210D,BnaA04g07120D,BnaA07g05070D,BnaA03g37700D,BnaA06g04900D,BnaC06g43550D,BnaC08g43130D,BnaA10g29890D,BnaCnng00070D,BnaC08g13600D
GO:0017025	TBP-class protein binding	molecular_function	14	39262	0.99016	1	0.690872	BnaC03g23420D,BnaA05g02290D,BnaC03g36480D,BnaA03g31150D,BnaA03g19530D,BnaC04g00230D,BnaC04g07470D,BnaA03g53510D,BnaA03g30700D,BnaC04g01970D,BnaC07g46150D,BnaC03g36000D,BnaC03g35990D,BnaC07g25820D
GO:0000774	adenyl-nucleotide exchange factor activity	molecular_function	13	39262	0	0	1.38174	BnaA03g48280D,BnaA08g14300D,BnaA10g09440D,BnaA01g15900D,BnaA10g17040D,BnaC08g47050D,BnaA08g29730D,BnaC02g07400D,BnaC09g31720D,BnaC09g40220D,BnaAnng15980D,BnaC08g12310D,BnaC07g40540D
GO:0003871	5-methyltetrahydropteroyltriglutamate-homocysteine S-methyltransferase activity	molecular_function	13	39262	0	0	1.38174	BnaA03g06790D,BnaA10g14580D,BnaC09g39920D,BnaA10g16880D,BnaC09g36890D,BnaA02g03770D,BnaA03g28400D,BnaC03g08690D,BnaC03g33530D,BnaC03g10390D,BnaC02g07610D,BnaC05g48040D,BnaA03g08190D
GO:0004017	adenylate kinase activity	molecular_function	13	39262	0	0	1.38174	BnaA05g12040D,BnaA06g22680D,BnaC03g50940D,BnaA06g30580D,BnaC08g47170D,BnaA03g23470D,BnaA08g07200D,BnaA05g12090D,BnaC07g26210D,BnaC03g27800D,BnaA09g02790D,BnaCnng15820D,BnaA09g06550D
GO:0004618	phosphoglycerate kinase activity	molecular_function	13	39262	0	0	1.38174	BnaC03g37820D,BnaC06g19780D,BnaA07g20290D,BnaC02g46710D,BnaA03g32440D,BnaA02g19260D,BnaC06g19770D,BnaC06g39910D,BnaA01g30320D,BnaA07g34980D,BnaC01g38270D,BnaCnng23600D,BnaCnng66610D
GO:0016836	hydro-lyase activity	molecular_function	13	39262	0	0	1.38174	BnaA08g05070D,BnaA09g42770D,BnaA03g02830D,BnaC04g34640D,BnaA02g14110D,BnaC02g18740D,BnaC03g04180D,BnaCnng15040D,BnaA02g00390D,BnaC08g47120D,BnaC02g00470D,BnaA04g12710D,BnaA04g06890D
GO:0017150	tRNA dihydrouridine synthase activity	molecular_function	13	39262	0	0	1.38174	BnaA07g29200D,BnaA06g15690D,BnaC09g07390D,BnaC08g21260D,BnaC07g49240D,BnaA09g07510D,BnaC07g16130D,BnaC06g32360D,BnaC01g00040D,BnaA06g30500D,BnaA07g12010D,BnaA01g05220D,BnaA06g15700D
GO:0004634	phosphopyruvate hydratase activity	molecular_function	13	39262	0.0108079	0.0202835	1.28305	BnaC08g24110D,BnaA05g07770D,BnaC04g08780D,BnaC03g20200D,BnaA05g12480D,BnaA07g17450D,BnaC06g34880D,BnaA05g34310D,BnaA03g16750D,BnaAnng30290D,BnaAnng21140D,BnaC04g54450D,BnaA07g31190D
GO:0008199	ferric iron binding	molecular_function	13	39262	0.0108079	0.0202835	1.28305	BnaA09g35560D,BnaA05g27910D,BnaC06g15730D,BnaC03g30250D,BnaA09g01420D,BnaC05g42110D,BnaC04g48390D,BnaA07g16710D,BnaC03g00160D,BnaA03g25740D,BnaA09g35550D,BnaA03g00260D,BnaC08g27000D
GO:0015385	sodium:proton antiporter activity	molecular_function	13	39262	0.0108079	0.0202835	1.28305	BnaA07g35030D,BnaA07g20250D,BnaC05g46790D,BnaC06g19720D,BnaA09g03600D,BnaA05g32130D,BnaC06g39970D,BnaA05g30980D,BnaC02g39630D,BnaC02g39600D,BnaA10g09580D,BnaC05g45460D,BnaC09g02990D
GO:0004020	adenylylsulfate kinase activity	molecular_function	13	39262	0.139282	0.203719	1.12267	BnaCnng47170D,BnaA08g16110D,BnaA03g38670D,BnaA06g25000D,BnaC03g48570D,BnaC01g00790D,BnaA01g34620D,BnaC09g08710D,BnaC07g51290D,BnaA03g54400D,BnaA05g37220D,BnaC05g47640D,BnaA09g08410D
GO:0016846	carbon-sulfur lyase activity	molecular_function	13	39262	0.139282	0.203719	1.12267	BnaC08g07070D,BnaA01g14030D,BnaA09g23340D,BnaAnng22040D,BnaC01g16530D,BnaC02g19980D,BnaA02g14990D,BnaA08g06520D,BnaC06g07950D,BnaC06g43720D,BnaA03g06310D,BnaC03g08110D,BnaAnng22030D
GO:0004030	aldehyde dehydrogenase [NAD(P)+] activity	molecular_function	13	39262	0.266994	0.356916	1.05663	BnaA01g02880D,BnaC08g05150D,BnaCnng49760D,BnaC03g61970D,BnaA01g01360D,BnaA08g15200D,BnaC01g04140D,BnaC01g02370D,BnaC07g46060D,BnaA07g05850D,BnaA03g59170D,BnaA08g04430D,BnaC05g25340D
GO:0015018	galactosylgalactosylxylosylprotein 3-beta-glucuronosyltransferase activity	molecular_function	13	39262	0.416968	0.514636	0.997926	BnaC04g08140D,BnaA09g27850D,BnaC07g11560D,BnaA07g37250D,BnaC07g16120D,BnaA05g07340D,BnaA10g05800D,BnaA01g00700D,BnaC03g58000D,BnaA07g12000D,BnaUnng02120D,BnaC01g01690D,BnaA08g18870D
GO:0008200	ion channel inhibitor activity	molecular_function	13	39262	0.87437	0.949667	0.816485	BnaC04g49060D,BnaA05g03400D,BnaC04g02990D,BnaC04g33470D,BnaA05g03390D,BnaA04g25150D,BnaA04g25120D,BnaA04g01570D,BnaC04g49020D,BnaA04g25190D,BnaC04g52990D,BnaA04g25160D,BnaA04g25130D
GO:0005375	copper ion transmembrane transporter activity	molecular_function	13	39262	0.924815	0.987113	0.780985	BnaA02g07170D,BnaA10g12280D,BnaC06g01530D,BnaC09g34470D,BnaC04g07580D,BnaC09g37220D,BnaA02g05020D,BnaA06g17790D,BnaC02g10130D,BnaA05g06720D,BnaA10g14850D,BnaCnng25960D,BnaC01g24930D
GO:0016165	linoleate 13S-lipoxygenase activity	molecular_function	13	39262	0.996699	1	0.641524	BnaCnng38640D,BnaC06g26670D,BnaA07g38540D,BnaCnng70330D,BnaA01g36630D,BnaC05g30190D,BnaA02g13230D,BnaC02g45800D,BnaA01g21450D,BnaC02g21440D,BnaA02g16020D,BnaA07g24960D,BnaC01g31590D
GO:0004072	aspartate kinase activity	molecular_function	12	39262	0	0	1.38174	BnaA10g20010D,BnaC02g13450D,BnaCnng21170D,BnaA01g34990D,BnaA09g25320D,BnaC01g41040D,BnaC09g43800D,BnaC02g04620D,BnaA02g09370D,BnaC03g06220D,BnaA03g04690D,BnaA02g01540D
GO:0004751	ribose-5-phosphate isomerase activity	molecular_function	12	39262	0	0	1.38174	BnaAnng10640D,BnaC05g47040D,BnaC02g33880D,BnaA06g35020D,BnaA02g15350D,BnaA01g33410D,BnaAnng10100D,BnaC07g18020D,BnaC07g20680D,BnaA02g27010D,BnaC01g39900D,BnaC02g20560D
GO:0008097	5S rRNA binding	molecular_function	12	39262	0	0	1.38174	BnaC07g26420D,BnaC03g62190D,BnaC03g44490D,BnaA06g30290D,BnaA03g57870D,BnaA08g15030D,BnaA07g04790D,BnaA01g13300D,BnaC07g47930D,BnaC03g44500D,BnaC01g15340D,BnaA03g57860D
GO:0003997	acyl-CoA oxidase activity	molecular_function	12	39262	0.014935	0.0271907	1.27546	BnaC03g49190D,BnaC05g04350D,BnaC09g06780D,BnaA10g28090D,BnaA10g28060D,BnaCnng35000D,BnaA09g07080D,BnaC05g04370D,BnaA10g28070D,BnaA06g24040D,BnaA03g16270D,BnaA01g18160D
GO:0004965	G-protein coupled GABA receptor activity	molecular_function	12	39262	0.014935	0.0271907	1.27546	BnaA03g14960D,BnaA05g10840D,BnaA08g29720D,BnaC08g46160D,BnaC08g44070D,BnaC05g03240D,BnaCnng51940D,BnaC04g12400D,BnaA03g14950D,BnaA05g10830D,BnaCnng51950D,BnaA10g03230D
GO:0045300	acyl-[acyl-carrier-protein] desaturase activity	molecular_function	12	39262	0.014935	0.0271907	1.27546	BnaA01g32860D,BnaC03g24420D,BnaC04g03030D,BnaC05g48250D,BnaC09g41590D,BnaA05g33500D,BnaA03g28050D,BnaA10g18080D,BnaA03g20420D,BnaA10g18090D,BnaC03g33080D,BnaA05g03490D
GO:0003951	NAD+ kinase activity	molecular_function	12	39262	0.0685885	0.107904	1.18435	BnaC01g32300D,BnaA03g36020D,BnaA02g18940D,BnaA07g34240D,BnaAnng17540D,BnaC05g16930D,BnaC03g41860D,BnaA01g25380D,BnaC02g25050D,BnaC06g39010D,BnaC05g31250D,BnaA06g15350D
GO:0004326	tetrahydrofolylpolyglutamate synthase activity	molecular_function	12	39262	0.0685885	0.107904	1.18435	BnaAnng01550D,BnaC02g02140D,BnaC03g02330D,BnaC09g49420D,BnaA10g24530D,BnaC01g38830D,BnaA03g01800D,BnaA03g37930D,BnaA01g31960D,BnaC07g19030D,BnaC02g46350D,BnaA06g36040D
GO:0004349	glutamate 5-kinase activity	molecular_function	12	39262	0.0685885	0.107904	1.18435	BnaA05g05760D,BnaC04g55460D,BnaC03g72600D,BnaC04g05620D,BnaA04g02330D,BnaA03g18760D,BnaA09g36870D,BnaA04g03460D,BnaA09g35230D,BnaC08g28560D,BnaC08g26550D,BnaC04g55570D
GO:0004826	phenylalanine-tRNA ligase activity	molecular_function	12	39262	0.0685885	0.107904	1.18435	BnaC04g33290D,BnaA07g17620D,BnaA09g37290D,BnaC09g41850D,BnaA09g42950D,BnaC08g29030D,BnaC08g47290D,BnaC06g16310D,BnaA04g12390D,BnaC08g49240D,BnaC09g41860D,BnaA10g18320D
GO:0045430	chalcone isomerase activity	molecular_function	12	39262	0.0685885	0.107904	1.18435	BnaA10g25120D,BnaC07g45760D,BnaC08g26010D,BnaC06g06390D,BnaA06g00880D,BnaCnng45660D,BnaC09g50050D,BnaC04g20870D,BnaC08g26020D,BnaA04g00080D,BnaA07g37900D,BnaA09g34840D
GO:0033743	peptide-methionine (R)-S-oxide reductase activity	molecular_function	12	39262	0.172371	0.245136	1.10539	BnaC07g36930D,BnaA01g11660D,BnaA03g44930D,BnaC07g06580D,BnaC03g30020D,BnaC06g06480D,BnaC03g64610D,BnaA08g10040D,BnaA07g02870D,BnaC01g13210D,BnaA06g00780D,BnaA03g25580D
GO:0004816	asparagine-tRNA ligase activity	molecular_function	12	39262	0.474223	0.569068	0.975348	BnaC09g33230D,BnaC03g35250D,BnaC05g44530D,BnaA03g30000D,BnaCnng18830D,BnaA10g10830D,BnaC03g13340D,BnaC01g21050D,BnaA01g17760D,BnaA03g10650D,BnaA05g30200D,BnaA08g30290D
GO:0004144	diacylglycerol O-acyltransferase activity	molecular_function	12	39262	1	1	0.385603	BnaA06g16100D,BnaC02g04350D,BnaA02g01260D,BnaA03g04000D,BnaC02g32190D,BnaA05g12980D,BnaC03g52610D,BnaC01g25960D,BnaA10g06730D,BnaC06g12160D,BnaA06g39110D,BnaA01g20710D
GO:0003878	ATP citrate synthase activity	molecular_function	11	39262	0	0	1.38174	BnaA03g02450D,BnaA10g23060D,BnaC09g47610D,BnaAnng06200D,BnaA02g30820D,BnaC03g03460D,BnaC02g01230D,BnaC09g02690D,BnaC07g49680D,BnaA03g39510D,BnaAnng28310D
GO:0004106	chorismate mutase activity	molecular_function	11	39262	0	0	1.38174	BnaC06g43480D,BnaA09g02570D,BnaC06g30540D,BnaA07g24300D,BnaC07g25660D,BnaA02g00750D,BnaA06g30990D,BnaCnng69960D,BnaC02g00030D,BnaA07g27910D,BnaC09g02030D
GO:0004775	succinate-CoA ligase (ADP-forming) activity	molecular_function	11	39262	0	0	1.38174	BnaA03g02450D,BnaA10g23060D,BnaC09g47610D,BnaAnng06200D,BnaA02g30820D,BnaC03g03460D,BnaC02g01230D,BnaC09g02690D,BnaC07g49680D,BnaA03g39510D,BnaAnng28310D
GO:0005338	nucleotide-sugar transmembrane transporter activity	molecular_function	11	39262	0	0	1.38174	BnaA01g02070D,BnaC07g45560D,BnaA09g07070D,BnaA03g53270D,BnaA04g24910D,BnaC03g49310D,BnaC01g03220D,BnaUnng00460D,BnaA04g11360D,BnaA08g15010D,BnaC03g62270D
GO:0003854	3-beta-hydroxy-delta5-steroid dehydrogenase activity	molecular_function	11	39262	0.0206381	0.0362638	1.2666	BnaC06g37250D,BnaC04g02920D,BnaA10g05250D,BnaA05g03320D,BnaA09g40620D,BnaC06g00160D,BnaC05g26540D,BnaA03g15520D,BnaC03g18740D,BnaC08g33090D,BnaA07g32770D
GO:0004013	adenosylhomocysteinase activity	molecular_function	11	39262	0.0206381	0.0362638	1.2666	BnaC01g43540D,BnaC07g07790D,BnaA07g06210D,BnaA01g23510D,BnaC08g46780D,BnaC01g37290D,BnaC03g74050D,BnaAnng08830D,BnaCnng19320D,BnaA04g06420D,BnaA03g57570D
GO:0004367	glycerol-3-phosphate dehydrogenase [NAD+] activity	molecular_function	11	39262	0.0206381	0.0362638	1.2666	BnaA05g29950D,BnaA03g19520D,BnaA04g23450D,BnaC05g44270D,BnaC04g01960D,BnaC06g42250D,BnaA05g02270D,BnaC04g32730D,BnaC04g47330D,BnaC03g23410D,BnaA07g15060D
GO:0004781	sulfate adenylyltransferase (ATP) activity	molecular_function	11	39262	0.0206381	0.0362638	1.2666	BnaC07g17320D,BnaC05g15510D,BnaA03g36860D,BnaCnng62800D,BnaCnng69640D,BnaA01g19120D,BnaA06g14140D,BnaC08g19100D,BnaA06g36560D,BnaC01g22950D,BnaA05g16830D
GO:0016209	antioxidant activity	molecular_function	11	39262	0.0206381	0.0362638	1.2666	BnaC03g73430D,BnaC05g16600D,BnaA03g31870D,BnaAnng24020D,BnaAnng25180D,BnaA06g15090D,BnaC03g75340D,BnaA05g27440D,BnaA06g19490D,BnaC05g41590D,BnaA03g31890D
GO:0016756	glutathione gamma-glutamylcysteinyltransferase activity	molecular_function	11	39262	0.0206381	0.0362638	1.2666	BnaC08g43630D,BnaA06g36340D,BnaC09g17830D,BnaA09g16890D,BnaA09g50750D,BnaC09g17840D,BnaA02g22480D,BnaA09g16870D,BnaCnng27040D,BnaC09g17850D,BnaC02g30770D
GO:0047334	diphosphate-fructose-6-phosphate 1-phosphotransferase activity	molecular_function	11	39262	0.0206381	0.0362638	1.2666	BnaA08g21540D,BnaA07g32860D,BnaC05g50320D,BnaC08g41630D,BnaA06g38560D,BnaA06g08370D,BnaC09g22950D,BnaC05g09740D,BnaC06g37390D,BnaA08g25000D,BnaC08g19600D
GO:0004066	asparagine synthase (glutamine-hydrolyzing) activity	molecular_function	11	39262	0.0890752	0.135718	1.16917	BnaA06g17510D,BnaC03g49300D,BnaC09g12810D,BnaA06g23950D,BnaC03g53730D,BnaA09g12410D,BnaC07g22450D,BnaA03g02840D,BnaCnng72260D,BnaC03g04190D,BnaA06g39840D
GO:0004449	isocitrate dehydrogenase (NAD+) activity	molecular_function	11	39262	0.0890752	0.135718	1.16917	BnaC03g65310D,BnaCnng02920D,BnaA10g26650D,BnaA03g00820D,BnaC03g01130D,BnaA08g10700D,BnaC02g03240D,BnaC07g06150D,BnaC05g43210D,BnaA07g03150D,BnaAnng18390D
GO:0019789	SUMO transferase activity	molecular_function	11	39262	0.0890752	0.135718	1.16917	BnaC05g38470D,BnaC08g28860D,BnaA05g24440D,BnaC05g27450D,BnaA04g02190D,BnaA07g17510D,BnaAnng34240D,BnaC06g16140D,BnaC04g21410D,BnaA04g27280D,BnaC04g23980D
GO:0050307	sucrose-phosphate phosphatase activity	molecular_function	11	39262	0.370496	0.46998	1.01328	BnaA04g04190D,BnaC04g44820D,BnaA09g34190D,BnaA03g16340D,BnaC03g19650D,BnaC08g25100D,BnaA04g20850D,BnaCnng46880D,BnaA05g15220D,BnaC06g08810D,BnaC03g68760D
GO:0016308	1-phosphatidylinositol-4-phosphate 5-kinase activity	molecular_function	11	39262	0.53472	0.630616	0.949948	BnaA08g21050D,BnaC08g20070D,BnaC01g39540D,BnaA09g40500D,BnaC09g14450D,BnaC05g08390D,BnaC05g43070D,BnaA02g36050D,BnaC02g24660D,BnaA05g28620D,BnaA09g14090D
GO:0004827	proline-tRNA ligase activity	molecular_function	11	39262	0.793564	0.878531	0.844399	BnaC06g18340D,BnaC04g31570D,BnaA07g19180D,BnaC08g32040D,BnaA09g39700D,BnaA02g10820D,BnaC02g15040D,BnaC09g28510D,BnaC04g31520D,BnaC04g31590D,BnaAnng24040D
GO:0008113	peptide-methionine (S)-S-oxide reductase activity	molecular_function	11	39262	0.989062	1	0.660834	BnaA09g09450D,BnaA03g47160D,BnaA01g14470D,BnaC01g17040D,BnaA03g02050D,BnaCnng27260D,BnaC09g47880D,BnaA10g23900D,BnaA08g20380D,BnaC09g47890D,BnaA10g23910D
GO:0003849	3-deoxy-7-phosphoheptulonate synthase activity	molecular_function	10	39262	0	0	1.38174	BnaC01g00830D,BnaC01g04680D,BnaA09g30660D,BnaCnng59540D,BnaA08g20870D,BnaA01g03400D,BnaC05g17710D,BnaC06g38770D,BnaA07g34140D,BnaA01g34720D
GO:0004348	glucosylceramidase activity	molecular_function	10	39262	0	0	1.38174	BnaC03g27520D,BnaC07g07920D,BnaC01g30560D,BnaC02g29350D,BnaA02g23500D,BnaA09g23550D,BnaA01g23710D,BnaC06g07690D,BnaA03g23280D,BnaA07g06340D
GO:0004462	lactoylglutathione lyase activity	molecular_function	10	39262	0	0	1.38174	BnaC06g28360D,BnaCnng47290D,BnaC08g15100D,BnaA07g26290D,BnaC05g05770D,BnaA06g07360D,BnaA06g04580D,BnaA08g25110D,BnaC05g08770D,BnaC03g51010D
GO:0004564	beta-fructofuranosidase activity	molecular_function	10	39262	0	0	1.38174	BnaC09g13230D,BnaA09g10570D,BnaC09g10830D,BnaC05g09640D,BnaC09g10840D,BnaA09g12880D,BnaA06g08310D,BnaC08g41390D,BnaA09g10560D,BnaA09g47290D
GO:0004575	sucrose alpha-glucosidase activity	molecular_function	10	39262	0	0	1.38174	BnaC09g13230D,BnaA09g10570D,BnaC09g10830D,BnaC05g09640D,BnaC09g10840D,BnaA09g12880D,BnaA06g08310D,BnaC08g41390D,BnaA09g10560D,BnaA09g47290D
GO:0004813	alanine-tRNA ligase activity	molecular_function	10	39262	0	0	1.38174	BnaA05g15950D,BnaA02g05940D,BnaC05g50520D,BnaA08g02200D,BnaUnng00940D,BnaA05g23270D,BnaC06g03380D,BnaC02g45400D,BnaC05g36690D,BnaA06g02930D
GO:0004820	glycine-tRNA ligase activity	molecular_function	10	39262	0	0	1.38174	BnaC06g22570D,BnaA07g07590D,BnaC06g22580D,BnaC07g09420D,BnaA07g21850D,BnaAnng37550D,BnaA09g26600D,BnaC06g22590D,BnaC06g22560D,BnaC05g22820D
GO:0005471	ATP:ADP antiporter activity	molecular_function	10	39262	0	0	1.38174	BnaC05g11870D,BnaA08g23810D,BnaC06g19090D,BnaC08g16710D,BnaC09g50020D,BnaA07g35740D,BnaA06g10210D,BnaA10g25090D,BnaA07g38360D,BnaC06g40660D
GO:0008428	ribonuclease inhibitor activity	molecular_function	10	39262	0	0	1.38174	BnaA03g28100D,BnaA02g08790D,BnaC02g12370D,BnaAnng29540D,BnaC03g13740D,BnaA03g10990D,BnaC03g33130D,BnaC03g07780D,BnaAnng12730D,BnaA03g06030D
GO:0008569	ATP-dependent microtubule motor activity, minus-end-directed	molecular_function	10	39262	0	0	1.38174	BnaC02g21300D,BnaC08g34890D,BnaC09g03220D,BnaC02g39770D,BnaA09g42430D,BnaA02g15880D,BnaA09g03790D,BnaA07g29980D,BnaA02g31200D,BnaC06g33290D
GO:0009011	starch synthase activity	molecular_function	10	39262	0	0	1.38174	BnaC08g15040D,BnaA08g08660D,BnaCnng18120D,BnaC08g11320D,BnaC07g30160D,BnaA06g26820D,BnaC05g48670D,BnaA05g34030D,BnaA06g07310D,BnaA08g25180D
GO:0010277	chlorophyllide a oxygenase [overall] activity	molecular_function	10	39262	0	0	1.38174	BnaC03g26840D,BnaC08g05120D,BnaA10g08760D,BnaA03g22780D,BnaA01g14880D,BnaAnng19090D,BnaC01g17540D,BnaC03g26820D,BnaAnng03490D,BnaC01g24000D
GO:0003896	DNA primase activity	molecular_function	10	39262	0.0285188	0.0489404	1.25613	BnaC06g13750D,BnaC02g14980D,BnaA04g11460D,BnaUnng00250D,BnaA02g10680D,BnaA07g25090D,BnaA02g13060D,BnaC02g45630D,BnaA07g15540D,BnaA10g06620D
GO:0004152	dihydroorotate dehydrogenase activity	molecular_function	10	39262	0.0285188	0.0489404	1.25613	BnaA01g27800D,BnaA06g26030D,BnaA09g05380D,BnaC02g42200D,BnaC01g34640D,BnaC09g04920D,BnaA05g22440D,BnaC03g40220D,BnaC05g35700D,BnaC08g23300D
GO:0004324	ferredoxin-NADP+ reductase activity	molecular_function	10	39262	0.0285188	0.0489404	1.25613	BnaA09g26030D,BnaA02g34830D,BnaC05g23490D,BnaC08g19150D,BnaAnng14750D,BnaC09g08190D,BnaA09g19760D,BnaC07g14870D,BnaC09g21770D,BnaA09g08030D
GO:0004617	phosphoglycerate dehydrogenase activity	molecular_function	10	39262	0.0285188	0.0489404	1.25613	BnaC07g44840D,BnaC01g04190D,BnaA08g11320D,BnaC08g17520D,BnaC03g40970D,BnaA03g50990D,BnaC03g77030D,BnaA03g35260D,BnaA08g22970D,BnaA01g02930D
GO:0004735	pyrroline-5-carboxylate reductase activity	molecular_function	10	39262	0.0285188	0.0489404	1.25613	BnaC04g11450D,BnaC06g16280D,BnaA10g19050D,BnaC04g18800D,BnaC09g42740D,BnaC04g12260D,BnaC03g63470D,BnaC03g06620D,BnaA03g05080D,BnaC04g18790D
GO:0004824	lysine-tRNA ligase activity	molecular_function	10	39262	0.0285188	0.0489404	1.25613	BnaC05g39850D,BnaA05g27370D,BnaAnng09530D,BnaA10g30390D,BnaC05g41490D,BnaA03g31900D,BnaC03g73420D,BnaA03g32860D,BnaAnng09520D,BnaA05g25810D
GO:0008883	glutamyl-tRNA reductase activity	molecular_function	10	39262	0.0285188	0.0489404	1.25613	BnaC01g28060D,BnaA01g35850D,BnaCnng70590D,BnaC01g25600D,BnaA09g14820D,BnaA09g57180D,BnaA01g20360D,BnaC08g42480D,BnaA06g07920D,BnaC09g15440D
GO:0003713	transcription coactivator activity	molecular_function	10	39262	0.115206	0.169968	1.15145	BnaA10g22660D,BnaA03g24640D,BnaAnng05920D,BnaA03g38530D,BnaCnng01760D,BnaC03g29230D,BnaC09g47220D,BnaA09g00310D,BnaC02g00960D,BnaC03g45340D
GO:0004450	isocitrate dehydrogenase (NADP+) activity	molecular_function	10	39262	0.115206	0.169968	1.15145	BnaC06g27300D,BnaA07g25510D,BnaAnng25840D,BnaA07g17800D,BnaC02g24620D,BnaCnng36970D,BnaA03g04970D,BnaC03g06570D,BnaAnng25850D,BnaA02g12320D
GO:0005267	potassium channel activity	molecular_function	10	39262	0.115206	0.169968	1.15145	BnaA10g09810D,BnaA03g43630D,BnaA03g11290D,BnaC01g40790D,BnaC09g32260D,BnaC07g35120D,BnaC03g71700D,BnaCnng01330D,BnaA01g08960D,BnaA09g00380D
GO:0016833	oxo-acid-lyase activity	molecular_function	10	39262	0.115206	0.169968	1.15145	BnaC03g02240D,BnaC09g49740D,BnaC03g26270D,BnaA03g01690D,BnaA10g24820D,BnaC01g19110D,BnaA03g21950D,BnaA07g14330D,BnaC04g31470D,BnaCnng46040D
GO:0016992	lipoate synthase activity	molecular_function	10	39262	0.115206	0.169968	1.15145	BnaA02g32880D,BnaC08g36170D,BnaC03g03570D,BnaC02g41630D,BnaC03g03580D,BnaA03g55720D,BnaC02g01120D,BnaA03g55730D,BnaAnng06100D,BnaA09g43570D
GO:0004407	histone deacetylase activity	molecular_function	10	39262	0.258927	0.348058	1.06288	BnaA06g22530D,BnaCnng15690D,BnaC01g40000D,BnaCnng09360D,BnaA01g33500D,BnaC03g51150D,BnaA06g18770D,BnaA06g16760D,BnaC03g54980D,BnaA09g06460D
GO:0008909	isochorismate synthase activity	molecular_function	10	39262	0.258927	0.348058	1.06288	BnaA07g22090D,BnaC06g22820D,BnaC05g14570D,BnaC08g37000D,BnaC06g35540D,BnaC08g48240D,BnaCnng08300D,BnaC08g18420D,BnaA06g13060D,BnaA08g22340D
GO:0008474	palmitoyl-(protein) hydrolase activity	molecular_function	10	39262	0.431007	0.530768	0.986959	BnaC01g20980D,BnaA03g43090D,BnaA07g18630D,BnaCnng05050D,BnaC01g33520D,BnaAnng23510D,BnaA09g18240D,BnaC01g20970D,BnaC06g42800D,BnaC07g34360D
GO:0008878	glucose-1-phosphate adenylyltransferase activity	molecular_function	10	39262	0.431007	0.530768	0.986959	BnaA07g04740D,BnaA06g30310D,BnaA06g40730D,BnaC04g33380D,BnaCnng00430D,BnaA04g12270D,BnaCnng59960D,BnaA09g27810D,BnaC05g21440D,BnaC07g47330D
GO:0043682	copper-transporting ATPase activity	molecular_function	10	39262	0.431007	0.530768	0.986959	BnaC03g31370D,BnaAnng05310D,BnaC04g20290D,BnaC09g11230D,BnaA09g53530D,BnaA09g10950D,BnaA02g23620D,BnaA10g06240D,BnaC07g18200D,BnaC03g31360D
GO:0017057	6-phosphogluconolactonase activity	molecular_function	10	39262	0.597412	0.696063	0.921162	BnaA06g39320D,BnaA09g46150D,BnaAnng18330D,BnaC07g49670D,BnaC07g30010D,BnaA01g20810D,BnaA09g04900D,BnaA06g39290D,BnaA06g26920D,BnaC07g49660D
GO:0003984	acetolactate synthase activity	molecular_function	10	39262	0.735335	0.824057	0.863589	BnaA03g14730D,BnaC03g17780D,BnaC02g06500D,BnaA05g11160D,BnaA01g20380D,BnaA02g03040D,BnaC04g42560D,BnaA04g18470D,BnaC01g25380D,BnaC04g12850D
GO:0003840	gamma-glutamyltransferase activity	molecular_function	10	39262	0.999977	1	0.476463	BnaA01g05660D,BnaA01g05630D,BnaA09g02940D,BnaC07g41840D,BnaA03g49430D,BnaC01g00520D,BnaA01g07620D,BnaA03g49440D,BnaC01g09290D,BnaC01g00540D
GO:0004047	aminomethyltransferase activity	molecular_function	9	39262	0	0	1.38174	BnaAnng18080D,BnaA08g25100D,BnaA09g21100D,BnaA06g07360D,BnaC08g15110D,BnaC01g43290D,BnaC08g41790D,BnaA09g47510D,BnaC09g23440D
GO:0004310	farnesyl-diphosphate farnesyltransferase activity	molecular_function	9	39262	0	0	1.38174	BnaA08g11060D,BnaC07g45160D,BnaC01g03770D,BnaA01g02510D,BnaC01g03780D,BnaC03g65910D,BnaA01g02520D,BnaA03g52950D,BnaC07g45150D
GO:0004392	heme oxygenase (decyclizing) activity	molecular_function	9	39262	0	0	1.38174	BnaA09g27040D,BnaC06g17920D,BnaC07g16850D,BnaA07g12810D,BnaC06g27630D,BnaA09g14830D,BnaCnng72350D,BnaC05g24860D,BnaA09g24220D
GO:0004594	pantothenate kinase activity	molecular_function	9	39262	0	0	1.38174	BnaA09g14200D,BnaC01g06290D,BnaC04g47550D,BnaC05g34630D,BnaA04g20900D,BnaC09g14740D,BnaA01g04760D,BnaA08g30620D,BnaA01g22340D
GO:0004611	phosphoenolpyruvate carboxykinase activity	molecular_function	9	39262	0	0	1.38174	BnaC02g43920D,BnaA03g54330D,BnaA06g24600D,BnaA01g00210D,BnaC07g46800D,BnaA06g24610D,BnaAnng05000D,BnaCnng13230D,BnaC01g01140D
GO:0004612	phosphoenolpyruvate carboxykinase (ATP) activity	molecular_function	9	39262	0	0	1.38174	BnaC02g43920D,BnaA03g54330D,BnaA06g24600D,BnaA01g00210D,BnaC07g46800D,BnaA06g24610D,BnaAnng05000D,BnaCnng13230D,BnaC01g01140D
GO:0004649	poly(ADP-ribose) glycohydrolase activity	molecular_function	9	39262	0	0	1.38174	BnaCnng33160D,BnaCnng76200D,BnaA04g18140D,BnaA05g11130D,BnaA04g18150D,BnaC04g42210D,BnaA04g18560D,BnaCnng33150D,BnaA04g18570D
GO:0004765	shikimate kinase activity	molecular_function	9	39262	0	0	1.38174	BnaC04g44410D,BnaCnng13770D,BnaA09g08890D,BnaA04g12570D,BnaC01g00420D,BnaA06g32580D,BnaC09g09150D,BnaA01g05540D,BnaC07g23990D
GO:0009881	photoreceptor activity	molecular_function	9	39262	0	0	1.38174	BnaC03g39830D,BnaCnng19880D,BnaC06g11890D,BnaA05g22950D,BnaC08g42660D,BnaA09g48410D,BnaC01g40810D,BnaC05g36390D,BnaA05g12750D
GO:0016538	cyclin-dependent protein serine/threonine kinase regulator activity	molecular_function	9	39262	0	0	1.38174	BnaC09g03240D,BnaA04g16160D,BnaC03g77050D,BnaA06g28650D,BnaC04g39400D,BnaA08g11330D,BnaA02g31220D,BnaA09g03810D,BnaC07g28080D
GO:0016972	thiol oxidase activity	molecular_function	9	39262	0	0	1.38174	BnaC07g20660D,BnaA06g09770D,BnaA02g27030D,BnaC02g33860D,BnaC05g11330D,BnaC08g39100D,BnaC03g68350D,BnaA09g45290D,BnaA08g02340D
GO:0017069	snRNA binding	molecular_function	9	39262	0	0	1.38174	BnaA07g37330D,BnaC06g40580D,BnaC04g51850D,BnaC05g16550D,BnaC07g14580D,BnaA05g00380D,BnaA05g12150D,BnaA06g15070D,BnaC04g14490D
GO:0017076	purine nucleotide binding	molecular_function	9	39262	0	0	1.38174	BnaC02g43920D,BnaA03g54330D,BnaA06g24600D,BnaA01g00210D,BnaC07g46800D,BnaA06g24610D,BnaAnng05000D,BnaCnng13230D,BnaC01g01140D
GO:0070008	serine-type exopeptidase activity	molecular_function	9	39262	0	0	1.38174	BnaC05g15740D,BnaA06g02850D,BnaCnng28400D,BnaC06g36830D,BnaA07g32380D,BnaC06g29920D,BnaA06g14380D,BnaA07g27650D,BnaCnng64630D
GO:0004619	phosphoglycerate mutase activity	molecular_function	9	39262	0.0394084	0.0657074	1.24357	BnaA05g29640D,BnaA08g26140D,BnaA02g18710D,BnaA07g33900D,BnaC08g13860D,BnaC06g38530D,BnaAnng14300D,BnaC05g43970D,BnaC02g24750D
GO:0004749	ribose phosphate diphosphokinase activity	molecular_function	9	39262	0.0394084	0.0657074	1.24357	BnaC05g28770D,BnaA05g08630D,BnaC05g08230D,BnaC04g49680D,BnaA06g06560D,BnaC05g24530D,BnaC04g09710D,BnaA04g25770D,BnaA09g24370D
GO:0004791	thioredoxin-disulfide reductase activity	molecular_function	9	39262	0.0394084	0.0657074	1.24357	BnaA03g19550D,BnaC07g45590D,BnaA08g14980D,BnaA09g09110D,BnaA03g53300D,BnaC09g09340D,BnaA05g02330D,BnaC03g23440D,BnaC04g02020D
GO:0008444	CDP-diacylglycerol-glycerol-3-phosphate 3-phosphatidyltransferase activity	molecular_function	9	39262	0.0394084	0.0657074	1.24357	BnaA07g16610D,BnaC06g15590D,BnaC03g22010D,BnaC08g25880D,BnaA03g18520D,BnaA07g07240D,BnaA04g03890D,BnaC04g25830D,BnaA09g54840D
GO:0008649	rRNA methyltransferase activity	molecular_function	9	39262	0.0394084	0.0657074	1.24357	BnaCnng69460D,BnaCnng08920D,BnaA05g00540D,BnaC03g72840D,BnaA03g21780D,BnaC04g51980D,BnaA07g12730D,BnaC03g26050D,BnaCnng46850D
GO:0070402	NADPH binding	molecular_function	9	39262	0.0394084	0.0657074	1.24357	BnaA03g20590D,BnaA04g25510D,BnaA06g22280D,BnaC03g24630D,BnaC03g51460D,BnaC03g15660D,BnaC09g50930D,BnaC04g49400D,BnaA09g06230D
GO:0008198	ferrous iron binding	molecular_function	9	39262	0.148305	0.212937	1.13052	BnaC06g11450D,BnaC08g10100D,BnaAnng27720D,BnaC01g27350D,BnaA08g05620D,BnaC06g11460D,BnaC08g10030D,BnaCnng45580D,BnaAnng27710D
GO:0043141	ATP-dependent 5'-3' DNA helicase activity	molecular_function	9	39262	0.148305	0.212937	1.13052	BnaA03g08480D,BnaC02g09460D,BnaC03g48680D,BnaA02g05570D,BnaC05g38040D,BnaC03g10810D,BnaC09g07130D,BnaA06g24900D,BnaA10g14040D
GO:0030515	snoRNA binding	molecular_function	9	39262	0.313798	0.40398	1.03631	BnaA03g06930D,BnaA01g33870D,BnaC01g40380D,BnaCnng43190D,BnaC02g48350D,BnaC03g08830D,BnaC02g07930D,BnaA10g01980D,BnaA02g04000D
GO:0050113	inositol oxygenase activity	molecular_function	9	39262	0.313798	0.40398	1.03631	BnaA01g23900D,BnaC07g01430D,BnaC05g49660D,BnaA03g47910D,BnaA09g10050D,BnaC09g10140D,BnaAnng22250D,BnaC07g40160D,BnaA07g00980D
GO:0004559	alpha-mannosidase activity	molecular_function	9	39262	0.496701	0.591293	0.956591	BnaC07g23810D,BnaA03g05150D,BnaC02g05850D,BnaC03g06150D,BnaA02g02390D,BnaC03g06700D,BnaA06g32690D,BnaC01g30310D,BnaA03g04620D
GO:0004576	oligosaccharyl transferase activity	molecular_function	9	39262	0.496701	0.591293	0.956591	BnaC03g09700D,BnaA03g07700D,BnaA05g18450D,BnaA09g23290D,BnaA10g15480D,BnaC09g38000D,BnaCnng71800D,BnaC09g37990D,BnaC06g08000D
GO:0008318	protein prenyltransferase activity	molecular_function	9	39262	0.496701	0.591293	0.956591	BnaC01g41870D,BnaC07g38940D,BnaAnng10040D,BnaA01g18430D,BnaA09g17110D,BnaA03g46740D,BnaC01g41500D,BnaC07g17910D,BnaAnng40160D
GO:0009916	alternative oxidase activity	molecular_function	9	39262	0.496701	0.591293	0.956591	BnaC01g13770D,BnaA03g36620D,BnaCnng63430D,BnaC09g06270D,BnaC05g30210D,BnaA05g17260D,BnaCnng60000D,BnaA05g35970D,BnaA01g12080D
GO:0004830	tryptophan-tRNA ligase activity	molecular_function	9	39262	0.660935	0.759845	0.888263	BnaC04g38130D,BnaA03g28620D,BnaC03g73230D,BnaC03g33750D,BnaA01g33520D,BnaA03g12530D,BnaA04g15180D,BnaC03g15410D,BnaC01g40020D
[truncated: 391 more rows]
